# Supplementary material for: Splicing across adipocyte differentiation is highly dynamic and impacted by metabolic phenotype
Source: Research Square preprint supplement (doi:10.21203/rs.3.rs-3487148/v1), 2023-10-31
Supplement: Supplementary file 1 [file 4178c7d49659142d88eddafb.xlsx]

## Sheet: BMI lean conf vs day 3
exon_chr	exon_start	exon_end	exon_name	snp_chr	snp_start	snp_end	snp_name
chr4	139890966	140152861	chr4_MAML3-:E004:downstream	chr4	139943602	139943603	rs10000502
chr4	30731215	30786728	chr4_PCDH7+:E005:downstream	chr4	30766513	30766514	rs10008728
chr4	30731215	30786728	chr4_PCDH7+:E005:downstream	chr4	30746922	30746923	rs10024115
chr4	139730666	139889358	chr4_MAML3-:E004:upstream	chr4	139843192	139843193	rs10024138
chr14	78988140	79279340	chr14_NRXN3+:E025:upstream	chr14	78992268	78992269	rs10131645
chr14	78988140	79279340	chr14_NRXN3+:E025:upstream	chr14	79032995	79032996	rs10133874
chr14	78988140	79279340	chr14_NRXN3+:E025:upstream	chr14	79035328	79035329	rs10135754
chr14	78988140	79279340	chr14_NRXN3+:E025:upstream	chr14	79035403	79035404	rs10135769
chr14	78988140	79279340	chr14_NRXN3+:E025:upstream	chr14	79040003	79040004	rs10139460
chr14	78988140	79279340	chr14_NRXN3+:E025:upstream	chr14	79113515	79113516	rs10141828
chr14	79280537	79467222	chr14_NRXN3+:E025:downstream	chr14	79404466	79404467	rs10144614
chr14	78988140	79279340	chr14_NRXN3+:E025:upstream	chr14	79042355	79042356	rs10146180
chr14	78988140	79279340	chr14_NRXN3+:E025:upstream	chr14	79033506	79033507	rs10146527
chr14	78988140	79279340	chr14_NRXN3+:E025:upstream	chr14	79035494	79035495	rs10146542
chr14	79280537	79467222	chr14_NRXN3+:E025:downstream	chr14	79424112	79424113	rs10146690
chr14	78988140	79279340	chr14_NRXN3+:E025:upstream	chr14	79060358	79060359	rs10147558
chr14	78988140	79279340	chr14_NRXN3+:E025:upstream	chr14	79047809	79047810	rs10147940
chr14	78988140	79279340	chr14_NRXN3+:E025:upstream	chr14	79036395	79036396	rs10150011
chr14	79280537	79467222	chr14_NRXN3+:E025:downstream	chr14	79425538	79425539	rs10150482
chr14	78988140	79279340	chr14_NRXN3+:E025:upstream	chr14	79039991	79039992	rs10151590
chr7	69599961	69824666	chr7_AUTS2+:E002:downstream	chr7	69816124	69816125	rs10259748
chr7	1816227	1898201	chr7_MAD1L1-:E002:downstream	chr7	1897624	1897625	rs10267593
chr15	51782827	51798198	chr15_TMOD2+:E009:upstream	chr15	51790560	51790561	rs10444823
chr14	79280537	79467222	chr14_NRXN3+:E025:downstream	chr14	79382629	79382630	rs10450934
chr1	174969386	174976079	chr1_RABGAP1L+:E045:downstream	chr1	174975275	174975276	rs10489333
chr5	154191024	154294817	chr5_GALNT10+:E001:downstream	chr5	154198957	154198958	rs10515706
chr10	63269222	63380319	chr10_JMJD1C-:E030:downstream	chr10	63341446	63341447	rs10740118
chr10	21929140	22003214	chr10_DNAJC1-:E014:upstream	chr10	21980917	21980918	rs10740997
chr10	63264763	63268664	chr10_JMJD1C-:E030:upstream	chr10	63267849	63267850	rs10761731
chr10	63269222	63380319	chr10_JMJD1C-:E030:downstream	chr10	63302247	63302248	rs10761739
chr10	63269222	63380319	chr10_JMJD1C-:E030:downstream	chr10	63306425	63306426	rs10761741
chr10	63269222	63380319	chr10_JMJD1C-:E030:downstream	chr10	63325287	63325288	rs10761742
chr10	21929140	22003214	chr10_DNAJC1-:E014:upstream	chr10	21997421	21997422	rs10764330
chr11	13277922	13309988	chr11_ARNTL+:E006:downstream	chr11	13296416	13296417	rs10766073
chr11	13277922	13309988	chr11_ARNTL+:E006:downstream	chr11	13297018	13297019	rs10766074
chr11	13277922	13309988	chr11_ARNTL+:E006:downstream	chr11	13297039	13297040	rs10766075
chr12	110715146	110719809	chr12_PPP1CC-:E004:upstream	chr12	110718141	110718142	rs10774603
chr15	51782827	51798198	chr15_TMOD2+:E009:upstream	chr15	51784843	51784844	rs10775145
chr10	63269222	63380319	chr10_JMJD1C-:E030:downstream	chr10	63364337	63364338	rs10822163
chr11	13277922	13309988	chr11_ARNTL+:E006:downstream	chr11	13299795	13299796	rs10832020
chr11	13277922	13309988	chr11_ARNTL+:E006:downstream	chr11	13302982	13302983	rs10832021
chr1	8656440	8703056	chr1_RERE-:E026:upstream	chr1	8664462	8664463	rs10864360
chr1	8656440	8703056	chr1_RERE-:E026:upstream	chr1	8666661	8666662	rs10864361
chr14	79280537	79467222	chr14_NRXN3+:E025:downstream	chr14	79402264	79402265	rs10873321
chr10	102645186	102654654	chr10_TRIM8+:E001:downstream	chr10	102652291	102652292	rs10883759
chr1	225519564	225530555	chr1_ENAH-:E014:downstream	chr1	225523484	225523485	rs10915846
chr9	33817933	33886882	chr9_UBE2R2+:E002:downstream	chr9	33820939	33820940	rs10971712
chr9	33817933	33886882	chr9_UBE2R2+:E002:downstream	chr9	33827154	33827155	rs10971720
chr9	33817933	33886882	chr9_UBE2R2+:E002:downstream	chr9	33827695	33827696	rs10971721
chr9	33817933	33886882	chr9_UBE2R2+:E002:downstream	chr9	33829603	33829604	rs10971723
chr9	33817933	33886882	chr9_UBE2R2+:E002:downstream	chr9	33834634	33834635	rs10971728
chr9	33817933	33886882	chr9_UBE2R2+:E002:downstream	chr9	33851800	33851801	rs10971735
chr9	33817933	33886882	chr9_UBE2R2+:E002:downstream	chr9	33855466	33855467	rs10971739
chr9	33817933	33886882	chr9_UBE2R2+:E002:downstream	chr9	33869782	33869783	rs10971750
chr9	33817933	33886882	chr9_UBE2R2+:E002:downstream	chr9	33870158	33870159	rs10971752
chr9	33817933	33886882	chr9_UBE2R2+:E002:downstream	chr9	33871713	33871714	rs10971754
chr9	33817933	33886882	chr9_UBE2R2+:E002:downstream	chr9	33876070	33876071	rs10971758
chr9	33912097	33917019	chr9_UBE2R2+:E006:upstream	chr9	33914413	33914414	rs10971787
chr9	33912097	33917019	chr9_UBE2R2+:E006:upstream	chr9	33915559	33915560	rs10971789
chr9	33912097	33917019	chr9_UBE2R2+:E006:upstream	chr9	33915669	33915670	rs10971790
chr11	13277922	13309988	chr11_ARNTL+:E006:downstream	chr11	13286046	13286047	rs11022750
chr11	13277922	13309988	chr11_ARNTL+:E006:downstream	chr11	13289306	13289307	rs11022753
chr11	13277922	13309988	chr11_ARNTL+:E006:downstream	chr11	13291695	13291696	rs11022754
chr11	13277922	13309988	chr11_ARNTL+:E006:downstream	chr11	13293501	13293502	rs11022755
chr11	13277922	13309988	chr11_ARNTL+:E006:downstream	chr11	13293891	13293892	rs11022756
chr11	27412859	27472119	chr11_LGR4-:E018:upstream	chr11	27455388	27455389	rs11030012
chr11	27412859	27472119	chr11_LGR4-:E018:upstream	chr11	27459279	27459280	rs11030014
chr11	27412859	27472119	chr11_LGR4-:E018:upstream	chr11	27466444	27466445	rs11030016
chr12	754323	813643	chr12_WNK1+:E004:downstream	chr12	780735	780736	rs11064524
chr12	110715146	110719809	chr12_PPP1CC-:E004:upstream	chr12	110717725	110717726	rs11065706
chr12	112419124	112446277	chr12_PTPN11+:E003:downstream	chr12	112433567	112433568	rs11066301
chr15	41669957	41696076	chr15_MGA+:E014:upstream	chr15	41684090	41684091	rs11070347
chr4	139730666	139889358	chr4_MAML3-:E004:upstream	chr4	139848768	139848769	rs11100308
chr1	8656440	8703056	chr1_RERE-:E026:upstream	chr1	8673068	8673069	rs11121215
chr3	47622340	47635191	chr3_SMARCC1-:E006:upstream	chr3	47626443	47626444	rs11130144
chr3	49674620	49675184	chr3_APEH+:E018:downstream	chr3	49674863	49674864	rs11130213
chr14	78988140	79279340	chr14_NRXN3+:E025:upstream	chr14	79073407	79073408	rs11159395
chr14	78988140	79279340	chr14_NRXN3+:E025:upstream	chr14	79144463	79144464	rs11159396
chr14	79280537	79467222	chr14_NRXN3+:E025:downstream	chr14	79401789	79401790	rs11159407
chr14	79280537	79467222	chr14_NRXN3+:E025:downstream	chr14	79408014	79408015	rs11159408
chr11	85380378	85598658	chr11_DLG2-:E057:upstream	chr11	85528943	85528944	rs11234359
chr1	39159019	39204303	chr1_MACF1+:E009:upstream	chr1	39174071	39174072	rs1126313
chr1	6604646	6612693	chr1_LOC107984913-:E002:upstream	chr1	6612668	6612669	rs11583755
chr1	6604646	6612693	chr1_LOC107984913-:E001:downstream	chr1	6612668	6612669	rs11583755
chr11	13277922	13309988	chr11_ARNTL+:E006:downstream	chr11	13296976	13296977	rs11605776
chr11	85598787	85626588	chr11_DLG2-:E057:downstream	chr11	85607475	85607476	rs11606688
chr14	78988140	79279340	chr14_NRXN3+:E025:upstream	chr14	79116436	79116437	rs11625343
chr14	79280537	79467222	chr14_NRXN3+:E025:downstream	chr14	79434939	79434940	rs11625620
chr14	79280537	79467222	chr14_NRXN3+:E025:downstream	chr14	79435121	79435122	rs11625769
chr14	78988140	79279340	chr14_NRXN3+:E025:upstream	chr14	79090274	79090275	rs11627661
chr14	78988140	79279340	chr14_NRXN3+:E025:upstream	chr14	79038652	79038653	rs11627905
chr14	78988140	79279340	chr14_NRXN3+:E025:upstream	chr14	78990320	78990321	rs11627971
chr2	46699448	46758520	chr2_SOCS5+:E002:downstream	chr2	46702733	46702734	rs11676737
chr2	46699448	46758520	chr2_SOCS5+:E002:downstream	chr2	46751209	46751210	rs11695058
chr7	1816227	1898201	chr7_MAD1L1-:E002:downstream	chr7	1852086	1852087	rs11764124
chr7	1816227	1898201	chr7_MAD1L1-:E002:downstream	chr7	1852672	1852673	rs11764337
chr7	1816227	1898201	chr7_MAD1L1-:E002:downstream	chr7	1818830	1818831	rs11765458
chr7	1816227	1898201	chr7_MAD1L1-:E002:downstream	chr7	1848414	1848415	rs11766944
chr7	1816227	1898201	chr7_MAD1L1-:E002:downstream	chr7	1859810	1859811	rs11770148
chr7	99392875	99394030	chr7_ARPC1B+:E014:downstream	chr7	99393557	99393558	rs11978089
chr1	6599451	6601798	chr1_KLHL21-:E005:upstream	chr1	6601671	6601672	rs12028517
chr11	85380378	85598658	chr11_DLG2-:E057:upstream	chr11	85509728	85509729	rs1213257
chr1	243552942	243563721	chr1_AKT3-:E012:upstream	chr1	243559911	243559912	rs12144559
chr14	78988140	79279340	chr14_NRXN3+:E025:upstream	chr14	79214959	79214960	rs12147298
chr14	78988140	79279340	chr14_NRXN3+:E025:upstream	chr14	79040387	79040388	rs12147468
chr14	103629493	103654565	chr14_KLC1+:E001:downstream	chr14	103633870	103633871	rs12147645
chr14	78988140	79279340	chr14_NRXN3+:E025:upstream	chr14	79056049	79056050	rs12147740
chr5	154191024	154294817	chr5_GALNT10+:E001:downstream	chr5	154214373	154214374	rs12187228
chr11	13277922	13309988	chr11_ARNTL+:E006:downstream	chr11	13292759	13292760	rs12290622
chr14	78988140	79279340	chr14_NRXN3+:E025:upstream	chr14	79095255	79095256	rs12323794
chr10	63269222	63380319	chr10_JMJD1C-:E030:downstream	chr10	63361804	63361805	rs12355784
chr9	33817933	33886882	chr9_UBE2R2+:E002:downstream	chr9	33837173	33837174	rs12378261
chr9	33817933	33886882	chr9_UBE2R2+:E002:downstream	chr9	33847587	33847588	rs12380143
chr11	117163891	117167422	chr11_PAFAH1B2+:E009:upstream	chr11	117164602	117164603	rs12420127
chr11	117145137	117152442	chr11_PAFAH1B2+:E004:upstream	chr11	117146813	117146814	rs12420725
chr11	85380378	85598658	chr11_DLG2-:E057:upstream	chr11	85566825	85566826	rs12420907
chr14	78988140	79279340	chr14_NRXN3+:E025:upstream	chr14	79091715	79091716	rs12431671
chr14	78988140	79279340	chr14_NRXN3+:E025:upstream	chr14	79067141	79067142	rs12434809
chr14	78988140	79279340	chr14_NRXN3+:E025:upstream	chr14	79041972	79041973	rs12435865
chr15	41669957	41696076	chr15_MGA+:E014:upstream	chr15	41692339	41692340	rs12441249
chr2	203280112	203285613	chr2_CYP20A1+:E013:upstream	chr2	203282498	203282499	rs12470569
chr4	139890966	140152861	chr4_MAML3-:E004:downstream	chr4	139988638	139988639	rs12504594
chr4	139890966	140152861	chr4_MAML3-:E004:downstream	chr4	139985235	139985236	rs12505942
chr4	76195863	76213428	chr4_SCARB2-:E012:upstream	chr4	76206617	76206618	rs12508946
chr4	139890966	140152861	chr4_MAML3-:E004:downstream	chr4	140016473	140016474	rs12509820
chr4	139730666	139889358	chr4_MAML3-:E004:upstream	chr4	139864360	139864361	rs12512994
chr10	21929140	22003214	chr10_DNAJC1-:E014:upstream	chr10	21998792	21998793	rs12571634
chr14	78988140	79279340	chr14_NRXN3+:E025:upstream	chr14	79061928	79061929	rs12586394
chr15	58787962	58802314	chr15_MINDY2+:E005:upstream	chr15	58792068	58792069	rs12591310
chr20	25339350	25390514	chr20_ABHD12-:E018:upstream	chr20	25346063	25346064	rs12625748
chr4	139890966	140152861	chr4_MAML3-:E004:downstream	chr4	140015561	140015562	rs12645862
chr5	154191024	154294817	chr5_GALNT10+:E001:downstream	chr5	154205590	154205591	rs12652187
chr2	203285731	203289766	chr2_CYP20A1+:E013:downstream	chr2	203287809	203287810	rs12693984
chr10	63269222	63380319	chr10_JMJD1C-:E030:downstream	chr10	63358084	63358085	rs12772006
chr10	63269222	63380319	chr10_JMJD1C-:E030:downstream	chr10	63331349	63331350	rs12783001
chr11	27412859	27472119	chr11_LGR4-:E018:upstream	chr11	27451157	27451158	rs12789402
chr14	78988140	79279340	chr14_NRXN3+:E025:upstream	chr14	79140836	79140837	rs12879491
chr14	78988140	79279340	chr14_NRXN3+:E025:upstream	chr14	79134026	79134027	rs12880107
chr14	78988140	79279340	chr14_NRXN3+:E025:upstream	chr14	79134090	79134091	rs12880289
chr14	78988140	79279340	chr14_NRXN3+:E025:upstream	chr14	79120137	79120138	rs12881434
chr14	78988140	79279340	chr14_NRXN3+:E025:upstream	chr14	79147529	79147530	rs12884914
chr14	79280537	79467222	chr14_NRXN3+:E025:downstream	chr14	79382161	79382162	rs12888940
chr14	78988140	79279340	chr14_NRXN3+:E025:upstream	chr14	79139348	79139349	rs12890392
chr14	78988140	79279340	chr14_NRXN3+:E025:upstream	chr14	79096516	79096517	rs12894123
chr14	78988140	79279340	chr14_NRXN3+:E025:upstream	chr14	79070098	79070099	rs12895916
chr15	51782827	51798198	chr15_TMOD2+:E009:upstream	chr15	51797113	51797114	rs12903707
chr15	41669957	41696076	chr15_MGA+:E014:upstream	chr15	41694440	41694441	rs12915325
chr15	41669957	41696076	chr15_MGA+:E014:upstream	chr15	41682928	41682929	rs12916992
chr16	19861972	19871817	chr16_GPRC5B-:E004:upstream	chr16	19869620	19869621	rs1292637
chr16	19872845	19882133	chr16_GPRC5B-:E004:downstream	chr16	19876150	19876151	rs1292641
chr16	28835757	28835934	chr16_ATXN2L+:E026:downstream	chr16	28835924	28835925	rs12928404
chr19	4013348	4024037	chr19_PIAS4+:E003:downstream	chr19	4020371	4020372	rs12982708
chr2	160367390	160407465	chr2_RBMS1-:E017:upstream	chr2	160385783	160385784	rs12998587
chr2	46699448	46758520	chr2_SOCS5+:E002:downstream	chr2	46711596	46711597	rs12999586
chr2	160367390	160407465	chr2_RBMS1-:E017:upstream	chr2	160396055	160396056	rs13005826
chr2	46699448	46758520	chr2_SOCS5+:E002:downstream	chr2	46711649	46711650	rs13025984
chr3	93928796	93973675	chr3_PROS1-:E016:upstream	chr3	93969666	93969667	rs13062355
chr3	81705612	81761376	chr3_GBE1-:E016:upstream	chr3	81727090	81727091	rs13072957
chr3	93928796	93973675	chr3_PROS1-:E016:upstream	chr3	93940943	93940944	rs13085785
chr4	30731215	30786728	chr4_PCDH7+:E005:downstream	chr4	30734678	30734679	rs13105058
chr4	139890966	140152861	chr4_MAML3-:E004:downstream	chr4	139992167	139992168	rs13109433
chr4	139890966	140152861	chr4_MAML3-:E004:downstream	chr4	139965808	139965809	rs13109980
chr4	30731215	30786728	chr4_PCDH7+:E005:downstream	chr4	30740773	30740774	rs13121800
chr4	139890966	140152861	chr4_MAML3-:E004:downstream	chr4	139995854	139995855	rs13143388
chr4	139890966	140152861	chr4_MAML3-:E004:downstream	chr4	140012349	140012350	rs13150296
chr1	11069729	11070901	chr1_EXOSC10-:E007:upstream	chr1	11070360	11070361	rs1318348
chr7	74658067	74689125	chr7_GTF2I+:E001:downstream	chr7	74680385	74680386	rs13227433
chr7	74658067	74689125	chr7_GTF2I+:E001:downstream	chr7	74662155	74662156	rs13238568
chr3	107526397	107599076	chr3_BBX+:E014:upstream	chr3	107561393	107561394	rs13317489
chr2	69374112	69382925	chr2_GFPT1-:E022:upstream	chr2	69379203	69379204	rs13422656
chr4	30731215	30786728	chr4_PCDH7+:E005:downstream	chr4	30777797	30777798	rs1348921
chr1	243552942	243563721	chr1_AKT3-:E012:upstream	chr1	243554379	243554380	rs1352162
chr11	85380378	85598658	chr11_DLG2-:E057:upstream	chr11	85525287	85525288	rs1354397
chr4	139890966	140152861	chr4_MAML3-:E004:downstream	chr4	139966338	139966339	rs1355334
chr4	52051790	52060420	chr4_SPATA18+:E003:downstream	chr4	52058269	52058270	rs1380853
chr14	78988140	79279340	chr14_NRXN3+:E025:upstream	chr14	78988328	78988329	rs1405474
chr11	85380378	85598658	chr11_DLG2-:E057:upstream	chr11	85576899	85576900	rs1425223
chr4	101197387	101346740	chr4_PPP3CA-:E017:upstream	chr4	101288202	101288203	rs1441433
chr4	30731215	30786728	chr4_PCDH7+:E005:downstream	chr4	30778284	30778285	rs1447364
chr5	154191024	154294817	chr5_GALNT10+:E001:downstream	chr5	154202438	154202439	rs1465416
chr11	13277922	13309988	chr11_ARNTL+:E006:downstream	chr11	13289170	13289171	rs1481891
chr11	13277922	13309988	chr11_ARNTL+:E006:downstream	chr11	13280373	13280374	rs1481892
chr4	139890966	140152861	chr4_MAML3-:E004:downstream	chr4	140016961	140016962	rs1510719
chr14	78988140	79279340	chr14_NRXN3+:E025:upstream	chr14	79028842	79028843	rs1532728
chr1	39159019	39204303	chr1_MACF1+:E009:upstream	chr1	39173980	39173981	rs1537817
chr14	78988140	79279340	chr14_NRXN3+:E025:upstream	chr14	78988175	78988176	rs154325
chr14	78988140	79279340	chr14_NRXN3+:E025:upstream	chr14	79047027	79047028	rs1547533
chr14	78988140	79279340	chr14_NRXN3+:E025:upstream	chr14	79060696	79060697	rs1566675
chr16	19882220	19884728	chr16_GPRC5B-:E006:upstream	chr16	19882298	19882299	rs1634675
chr1	39159019	39204303	chr1_MACF1+:E009:upstream	chr1	39177709	39177710	rs16825887
chr1	39159019	39204303	chr1_MACF1+:E009:upstream	chr1	39196835	39196836	rs16825939
chr1	39292842	39293459	chr1_MACF1+:E031:upstream	chr1	39292961	39292962	rs16826038
chr1	39292842	39293459	chr1_MACF1+:E030:downstream	chr1	39292961	39292962	rs16826038
chr1	39324733	39327219	chr1_MACF1+:E049:upstream	chr1	39326203	39326204	rs16826068
chr1	39324733	39327219	chr1_MACF1+:E048:downstream	chr1	39326203	39326204	rs16826068
chr1	39231242	39250015	chr1_MACF1+:E015:upstream	chr1	39238174	39238175	rs16837533
chr1	39231242	39250015	chr1_MACF1+:E014:downstream	chr1	39238174	39238175	rs16837533
chr16	19882220	19884728	chr16_GPRC5B-:E006:upstream	chr16	19882461	19882462	rs1690400
chr16	19872845	19882133	chr16_GPRC5B-:E004:downstream	chr16	19878900	19878901	rs1690402
chr4	76195863	76213428	chr4_SCARB2-:E012:upstream	chr4	76208414	76208415	rs17001654
chr14	78988140	79279340	chr14_NRXN3+:E025:upstream	chr14	79050646	79050647	rs17108575
chr14	79280537	79467222	chr14_NRXN3+:E025:downstream	chr14	79379023	79379024	rs17109102
chr14	79280537	79467222	chr14_NRXN3+:E025:downstream	chr14	79443775	79443776	rs17109221
chr4	139730666	139889358	chr4_MAML3-:E004:upstream	chr4	139855770	139855771	rs17289059
chr4	139730666	139889358	chr4_MAML3-:E004:upstream	chr4	139861387	139861388	rs17367750
chr4	139890966	140152861	chr4_MAML3-:E004:downstream	chr4	140012991	140012992	rs17373621
chr4	139890966	140152861	chr4_MAML3-:E004:downstream	chr4	140014109	140014110	rs17373738
chr15	51806520	51808421	chr15_TMOD2+:E011:upstream	chr15	51806703	51806704	rs17526463
chr5	154191024	154294817	chr5_GALNT10+:E001:downstream	chr5	154215731	154215732	rs17537995
chr10	63269222	63380319	chr10_JMJD1C-:E030:downstream	chr10	63378838	63378839	rs17740722
chr3	47622340	47635191	chr3_SMARCC1-:E006:upstream	chr3	47631424	47631425	rs17785248
chr2	46699448	46758520	chr2_SOCS5+:E002:downstream	chr2	46707365	46707366	rs17822019
chr2	46699448	46758520	chr2_SOCS5+:E002:downstream	chr2	46732864	46732865	rs17822294
chr14	79280537	79467222	chr14_NRXN3+:E025:downstream	chr14	79465697	79465698	rs17836088
chr17	16202305	16215363	chr17_NCOR1-:E068:upstream	chr17	16214044	16214045	rs178798
chr17	16202305	16215363	chr17_NCOR1-:E068:upstream	chr17	16210870	16210871	rs178799
chr18	23573573	23586288	chr18_NPC1-:E033:upstream	chr18	23574059	23574060	rs1788826
chr11	85380378	85598658	chr11_DLG2-:E057:upstream	chr11	85551771	85551772	rs1847433
chr11	85380378	85598658	chr11_DLG2-:E057:upstream	chr11	85534727	85534728	rs1863256
chr14	79280537	79467222	chr14_NRXN3+:E025:downstream	chr14	79457323	79457324	rs1865719
chr15	41669957	41696076	chr15_MGA+:E014:upstream	chr15	41671935	41671936	rs1867417
chr14	78988140	79279340	chr14_NRXN3+:E025:upstream	chr14	79046431	79046432	rs1875595
chr6	108664888	108679828	chr6_FOXO3+:E013:upstream	chr6	108678083	108678084	rs1935949
chr6	108664888	108679828	chr6_FOXO3+:E013:upstream	chr6	108677701	108677702	rs1935952
chr3	52550816	52552211	chr3_PBRM1-:E009:downstream	chr3	52551973	52551974	rs1961958
chr3	52550816	52552211	chr3_PBRM1-:E009:downstream	chr3	52551743	52551744	rs1961959
chr15	51829835	51834995	chr15_TMOD3+:E002:downstream	chr15	51832741	51832742	rs1972689
chr14	79280537	79467222	chr14_NRXN3+:E025:downstream	chr14	79381120	79381121	rs1993009
chr14	79280537	79467222	chr14_NRXN3+:E025:downstream	chr14	79410539	79410540	rs1993011
chr14	79280537	79467222	chr14_NRXN3+:E025:downstream	chr14	79414617	79414618	rs1993012
chr14	78988140	79279340	chr14_NRXN3+:E025:upstream	chr14	79050180	79050181	rs1995411
chr1	114720716	114723884	chr1_CSDE1-:E006:upstream	chr1	114723684	114723685	rs2007231
chr14	79280537	79467222	chr14_NRXN3+:E025:downstream	chr14	79444750	79444751	rs2011312
chr15	51829835	51834995	chr15_TMOD3+:E002:downstream	chr15	51830716	51830717	rs2014638
chr1	39439499	39441004	chr1_MACF1+:E090:upstream	chr1	39439915	39439916	rs2018212
chr1	39439499	39441004	chr1_MACF1+:E089:downstream	chr1	39439915	39439916	rs2018212
chr14	78988140	79279340	chr14_NRXN3+:E025:upstream	chr14	79112401	79112402	rs2035284
chr1	77092489	77122276	chr1_PIGK-:E001:downstream	chr1	77092672	77092673	rs2036444
chr5	108367952	108380700	chr5_FBXL17-:E021:upstream	chr5	108377078	108377079	rs2052464
chr14	78988140	79279340	chr14_NRXN3+:E025:upstream	chr14	79044946	79044947	rs2062740
chr14	78988140	79279340	chr14_NRXN3+:E025:upstream	chr14	79045019	79045020	rs2062741
chr14	78988140	79279340	chr14_NRXN3+:E025:upstream	chr14	79045171	79045172	rs2062744
chr14	78988140	79279340	chr14_NRXN3+:E025:upstream	chr14	79069385	79069386	rs2062746
chr6	26159201	26170976	chr6_HIST1H2BD+:E005:upstream	chr6	26168674	26168675	rs2066295
chr6	34287192	34392265	chr6_NUDT3-:E002:upstream	chr6	34381763	34381764	rs206919
chr6	34287192	34392265	chr6_NUDT3-:E001:downstream	chr6	34381763	34381764	rs206919
chr6	34287192	34392265	chr6_NUDT3-:E002:upstream	chr6	34335091	34335092	rs206936
chr6	34287192	34392265	chr6_NUDT3-:E001:downstream	chr6	34335091	34335092	rs206936
chr6	34287192	34392265	chr6_NUDT3-:E002:upstream	chr6	34287698	34287699	rs206942
chr6	34287192	34392265	chr6_NUDT3-:E001:downstream	chr6	34287698	34287699	rs206942
chr14	78988140	79279340	chr14_NRXN3+:E025:upstream	chr14	79073242	79073243	rs2088966
chr14	78988140	79279340	chr14_NRXN3+:E025:upstream	chr14	79073276	79073277	rs2088967
chr12	754323	813643	chr12_WNK1+:E004:downstream	chr12	793912	793913	rs2107614
chr5	154191024	154294817	chr5_GALNT10+:E001:downstream	chr5	154211159	154211160	rs2112689
chr14	78988140	79279340	chr14_NRXN3+:E025:upstream	chr14	79133223	79133224	rs2127450
chr14	78988140	79279340	chr14_NRXN3+:E025:upstream	chr14	79137200	79137201	rs2134366
chr6	108664888	108679828	chr6_FOXO3+:E013:upstream	chr6	108666980	108666981	rs2153960
chr14	79280537	79467222	chr14_NRXN3+:E025:downstream	chr14	79421025	79421026	rs2164434
chr14	79280537	79467222	chr14_NRXN3+:E025:downstream	chr14	79410872	79410873	rs2196443
chr14	79280537	79467222	chr14_NRXN3+:E025:downstream	chr14	79416954	79416955	rs2196446
chr14	79280537	79467222	chr14_NRXN3+:E025:downstream	chr14	79373867	79373868	rs2197988
chr14	79280537	79467222	chr14_NRXN3+:E025:downstream	chr14	79406560	79406561	rs2197990
chr14	79280537	79467222	chr14_NRXN3+:E025:downstream	chr14	79417581	79417582	rs2197993
chr14	78988140	79279340	chr14_NRXN3+:E025:upstream	chr14	79033281	79033282	rs2202167
chr14	78988140	79279340	chr14_NRXN3+:E025:upstream	chr14	79036744	79036745	rs2202168
chr14	78988140	79279340	chr14_NRXN3+:E025:upstream	chr14	79068883	79068884	rs2202171
chr14	78988140	79279340	chr14_NRXN3+:E025:upstream	chr14	79089307	79089308	rs2202175
chr14	78988140	79279340	chr14_NRXN3+:E025:upstream	chr14	78997436	78997437	rs2202185
chr14	79280537	79467222	chr14_NRXN3+:E025:downstream	chr14	79417481	79417482	rs2217887
chr14	79280537	79467222	chr14_NRXN3+:E025:downstream	chr14	79381441	79381442	rs2218783
chr14	78988140	79279340	chr14_NRXN3+:E025:upstream	chr14	79044218	79044219	rs2221297
chr14	78988140	79279340	chr14_NRXN3+:E025:upstream	chr14	79044243	79044244	rs2221298
chr1	39231242	39250015	chr1_MACF1+:E015:upstream	chr1	39237441	39237442	rs2254542
chr1	39231242	39250015	chr1_MACF1+:E014:downstream	chr1	39237441	39237442	rs2254542
chr4	139730666	139889358	chr4_MAML3-:E004:upstream	chr4	139866540	139866541	rs2271391
chr16	19861972	19871817	chr16_GPRC5B-:E004:upstream	chr16	19865850	19865851	rs227760
chr1	39084437	39105380	chr1_MACF1+:E007:upstream	chr1	39103898	39103899	rs2282231
chr1	39084437	39105380	chr1_MACF1+:E006:downstream	chr1	39103898	39103899	rs2282231
chr1	39447586	39447693	chr1_MACF1+:E099:upstream	chr1	39447678	39447679	rs2296173
chr1	39447586	39447693	chr1_MACF1+:E098:downstream	chr1	39447678	39447679	rs2296173
chr11	117145137	117152442	chr11_PAFAH1B2+:E004:upstream	chr11	117145733	117145734	rs2306471
chr16	31091341	31092784	chr16_VKORC1-:E002:downstream	chr16	31092474	31092475	rs2359612
chr16	69910404	69917710	chr16_WWP2+:E022:upstream	chr16	69911628	69911629	rs2362643
chr14	78988140	79279340	chr14_NRXN3+:E025:upstream	chr14	79035871	79035872	rs2370895
chr14	78988140	79279340	chr14_NRXN3+:E025:upstream	chr14	79105687	79105688	rs2370901
chr14	78988140	79279340	chr14_NRXN3+:E025:upstream	chr14	79114481	79114482	rs2370902
chr14	79280537	79467222	chr14_NRXN3+:E025:downstream	chr14	79424333	79424334	rs2370982
chr14	79280537	79467222	chr14_NRXN3+:E025:downstream	chr14	79437032	79437033	rs2370983
chr10	63269222	63380319	chr10_JMJD1C-:E030:downstream	chr10	63375053	63375054	rs2393966
chr11	13277922	13309988	chr11_ARNTL+:E006:downstream	chr11	13281274	13281275	rs2403662
chr20	25339350	25390514	chr20_ABHD12-:E018:upstream	chr20	25374057	25374058	rs2500399
chr20	25339350	25390514	chr20_ABHD12-:E018:upstream	chr20	25380189	25380190	rs2500405
chr7	74658067	74689125	chr7_GTF2I+:E001:downstream	chr7	74684614	74684615	rs2527366
chr7	74658067	74689125	chr7_GTF2I+:E001:downstream	chr7	74684803	74684804	rs2527367
chr14	79280537	79467222	chr14_NRXN3+:E025:downstream	chr14	79412983	79412984	rs2574750
chr14	79280537	79467222	chr14_NRXN3+:E025:downstream	chr14	79418436	79418437	rs2574751
chr4	101197387	101346740	chr4_PPP3CA-:E017:upstream	chr4	101283854	101283855	rs2583400
chr4	101197387	101346740	chr4_PPP3CA-:E017:upstream	chr4	101283371	101283372	rs2583401
chr4	101197387	101346740	chr4_PPP3CA-:E017:upstream	chr4	101247700	101247701	rs2583402
chr4	101197387	101346740	chr4_PPP3CA-:E017:upstream	chr4	101292562	101292563	rs2583406
chr14	79280537	79467222	chr14_NRXN3+:E025:downstream	chr14	79414777	79414778	rs2597087
chr14	79280537	79467222	chr14_NRXN3+:E025:downstream	chr14	79414791	79414792	rs2597088
chr14	79280537	79467222	chr14_NRXN3+:E025:downstream	chr14	79415228	79415229	rs2597090
chr14	79280537	79467222	chr14_NRXN3+:E025:downstream	chr14	79415567	79415568	rs2597091
chr14	79280537	79467222	chr14_NRXN3+:E025:downstream	chr14	79420371	79420372	rs2597092
chr14	79280537	79467222	chr14_NRXN3+:E025:downstream	chr14	79420483	79420484	rs2597093
chr14	78988140	79279340	chr14_NRXN3+:E025:upstream	chr14	79120592	79120593	rs2620398
chr10	21929140	22003214	chr10_DNAJC1-:E014:upstream	chr10	21930626	21930627	rs2666750
chr10	21929140	22003214	chr10_DNAJC1-:E014:upstream	chr10	21954142	21954143	rs2666754
chr10	21929140	22003214	chr10_DNAJC1-:E014:upstream	chr10	21955874	21955875	rs2666756
chr10	21929140	22003214	chr10_DNAJC1-:E014:upstream	chr10	21956369	21956370	rs2666757
chr10	21929140	22003214	chr10_DNAJC1-:E014:upstream	chr10	21966048	21966049	rs2666759
chr10	21929140	22003214	chr10_DNAJC1-:E014:upstream	chr10	21944157	21944158	rs2666772
chr10	21929140	22003214	chr10_DNAJC1-:E014:upstream	chr10	21951369	21951370	rs2666775
chr10	21929140	22003214	chr10_DNAJC1-:E014:upstream	chr10	21953058	21953059	rs2666776
chr1	11069729	11070901	chr1_EXOSC10-:E007:upstream	chr1	11069790	11069791	rs2791653
chr10	21929140	22003214	chr10_DNAJC1-:E014:upstream	chr10	21973442	21973443	rs2807971
chr10	21929140	22003214	chr10_DNAJC1-:E014:upstream	chr10	21929843	21929844	rs2807983
chr10	21929140	22003214	chr10_DNAJC1-:E014:upstream	chr10	21930011	21930012	rs2807984
chr10	21929140	22003214	chr10_DNAJC1-:E014:upstream	chr10	21941544	21941545	rs2807985
chr10	21929140	22003214	chr10_DNAJC1-:E014:upstream	chr10	21944863	21944864	rs2807986
chr10	21929140	22003214	chr10_DNAJC1-:E014:upstream	chr10	21951022	21951023	rs2807987
chr10	21929140	22003214	chr10_DNAJC1-:E014:upstream	chr10	21952282	21952283	rs2807988
chr4	101197387	101346740	chr4_PPP3CA-:E017:upstream	chr4	101277656	101277657	rs2850344
chr4	101197387	101346740	chr4_PPP3CA-:E017:upstream	chr4	101284227	101284228	rs2850350
chr4	101197387	101346740	chr4_PPP3CA-:E017:upstream	chr4	101284240	101284241	rs2850351
chr4	101197387	101346740	chr4_PPP3CA-:E017:upstream	chr4	101287506	101287507	rs2850354
chr4	101197387	101346740	chr4_PPP3CA-:E017:upstream	chr4	101290064	101290065	rs2850355
chr4	101197387	101346740	chr4_PPP3CA-:E017:upstream	chr4	101290764	101290765	rs2850356
chr4	101197387	101346740	chr4_PPP3CA-:E017:upstream	chr4	101255999	101256000	rs2850963
chr4	101197387	101346740	chr4_PPP3CA-:E017:upstream	chr4	101262436	101262437	rs2850969
chr4	101197387	101346740	chr4_PPP3CA-:E017:upstream	chr4	101274290	101274291	rs2850974
chr4	101197387	101346740	chr4_PPP3CA-:E017:upstream	chr4	101281127	101281128	rs2850976
chr10	21929140	22003214	chr10_DNAJC1-:E014:upstream	chr10	21959494	21959495	rs2859622
chr11	85380378	85598658	chr11_DLG2-:E057:upstream	chr11	85516394	85516395	rs286510
chr11	85380378	85598658	chr11_DLG2-:E057:upstream	chr11	85513754	85513755	rs286511
chr11	85380378	85598658	chr11_DLG2-:E057:upstream	chr11	85457525	85457526	rs286515
chr11	85380378	85598658	chr11_DLG2-:E057:upstream	chr11	85495310	85495311	rs286526
chr14	78988140	79279340	chr14_NRXN3+:E025:upstream	chr14	79035675	79035676	rs2887887
chr10	63269222	63380319	chr10_JMJD1C-:E030:downstream	chr10	63375017	63375018	rs2893919
chr15	51893944	51896420	chr15_TMOD3+:E010:upstream	chr15	51893960	51893961	rs2959285
chr15	51896525	51900156	chr15_TMOD3+:E010:downstream	chr15	51898945	51898946	rs2959298
chr1	243489139	243497868	chr1_SDCCAG8+:E034:downstream	chr1	243494096	243494097	rs3006927
chr1	243489139	243497868	chr1_SDCCAG8+:E034:downstream	chr1	243494727	243494728	rs3006928
chr4	139890966	140152861	chr4_MAML3-:E004:downstream	chr4	139963568	139963569	rs3106209
chr19	4117628	4123785	chr19_MAP2K2-:E014:upstream	chr19	4119013	4119014	rs350887
chr19	4117628	4123785	chr19_MAP2K2-:E014:upstream	chr19	4117706	4117707	rs350890
chr2	164800553	164841157	chr2_COBLL1-:E019:upstream	chr2	164829135	164829136	rs355810
chr13	30461687	30462539	chr13_HMGB1-:E006:upstream	chr13	30462504	30462505	rs3742305
chr15	51806520	51808421	chr15_TMOD2+:E011:upstream	chr15	51808093	51808094	rs3751596
chr1	243552942	243563721	chr1_AKT3-:E012:upstream	chr1	243559589	243559590	rs3753549
chr1	39347209	39349479	chr1_MACF1+:E057:upstream	chr1	39349287	39349288	rs3754346
chr1	39347209	39349479	chr1_MACF1+:E056:downstream	chr1	39349287	39349288	rs3754346
chr1	39388657	39422375	chr1_MACF1+:E074:downstream	chr1	39414646	39414647	rs3768302
chr1	39565377	39567752	chr1_PABPC4-:E012:upstream	chr1	39566566	39566567	rs3768320
chr3	81705612	81761376	chr3_GBE1-:E016:upstream	chr3	81759450	81759451	rs3772882
chr3	81705612	81761376	chr3_GBE1-:E016:upstream	chr3	81753650	81753651	rs3772883
chr3	81705612	81761376	chr3_GBE1-:E016:upstream	chr3	81753568	81753569	rs3772884
chr6	108664888	108679828	chr6_FOXO3+:E013:upstream	chr6	108665402	108665403	rs3778586
chr14	103629493	103654565	chr14_KLC1+:E001:downstream	chr14	103652160	103652161	rs3783404
chr15	51798339	51806378	chr15_TMOD2+:E009:downstream	chr15	51798683	51798684	rs3794534
chr15	51798339	51806378	chr15_TMOD2+:E009:downstream	chr15	51798969	51798970	rs3794535
chr4	139730666	139889358	chr4_MAML3-:E004:upstream	chr4	139840122	139840123	rs3796627
chr6	34287192	34392265	chr6_NUDT3-:E002:upstream	chr6	34375788	34375789	rs3798560
chr6	34287192	34392265	chr6_NUDT3-:E001:downstream	chr6	34375788	34375789	rs3798560
chr6	108664888	108679828	chr6_FOXO3+:E013:upstream	chr6	108667391	108667392	rs3800226
chr6	108664888	108679828	chr6_FOXO3+:E013:upstream	chr6	108672957	108672958	rs3800227
chr6	108664888	108679828	chr6_FOXO3+:E013:upstream	chr6	108675759	108675760	rs3800229
chr6	108664888	108679828	chr6_FOXO3+:E013:upstream	chr6	108676924	108676925	rs3800230
chr4	101197387	101346740	chr4_PPP3CA-:E017:upstream	chr4	101222458	101222459	rs3804381
chr1	39282373	39283190	chr1_MACF1+:E021:upstream	chr1	39282598	39282599	rs3818806
chr1	39282373	39283190	chr1_MACF1+:E020:downstream	chr1	39282598	39282599	rs3818806
chr3	81705612	81761376	chr3_GBE1-:E016:upstream	chr3	81709576	81709577	rs3821548
chr3	81705612	81761376	chr3_GBE1-:E016:upstream	chr3	81742960	81742961	rs3849570
chr3	81705612	81761376	chr3_GBE1-:E016:upstream	chr3	81728564	81728565	rs3849571
chr2	164800553	164841157	chr2_COBLL1-:E019:upstream	chr2	164811132	164811133	rs409125
chr11	27412859	27472119	chr11_LGR4-:E018:upstream	chr11	27422969	27422970	rs4128868
chr11	811644	812536	chr11_RPLP2+:E004:upstream	chr11	812187	812188	rs4131364
chr11	13277922	13309988	chr11_ARNTL+:E006:downstream	chr11	13285057	13285058	rs4146388
chr10	21929140	22003214	chr10_DNAJC1-:E014:upstream	chr10	21987889	21987890	rs4146689
chr6	34287192	34392265	chr6_NUDT3-:E002:upstream	chr6	34376875	34376876	rs414739
chr6	34287192	34392265	chr6_NUDT3-:E001:downstream	chr6	34376875	34376876	rs414739
chr14	79280537	79467222	chr14_NRXN3+:E025:downstream	chr14	79388665	79388666	rs4243663
chr10	21929140	22003214	chr10_DNAJC1-:E014:upstream	chr10	21996441	21996442	rs4364959
chr4	30731215	30786728	chr4_PCDH7+:E005:downstream	chr4	30766052	30766053	rs4380480
chr3	81705612	81761376	chr3_GBE1-:E016:upstream	chr3	81753266	81753267	rs4411908
chr11	13277922	13309988	chr11_ARNTL+:E006:downstream	chr11	13284763	13284764	rs4414197
chr15	41669957	41696076	chr15_MGA+:E014:upstream	chr15	41679702	41679703	rs4465584
chr6	26159201	26170976	chr6_HIST1H2BD+:E005:upstream	chr6	26167481	26167482	rs4486004
chr4	30731215	30786728	chr4_PCDH7+:E005:downstream	chr4	30760849	30760850	rs4505780
chr11	27412859	27472119	chr11_LGR4-:E018:upstream	chr11	27434511	27434512	rs4514364
chr11	27412859	27472119	chr11_LGR4-:E018:upstream	chr11	27445561	27445562	rs4536164
chr2	160318226	160367217	chr2_RBMS1-:E014:downstream	chr2	160343753	160343754	rs4597468
chr14	79280537	79467222	chr14_NRXN3+:E025:downstream	chr14	79389373	79389374	rs4603484
chr6	34287192	34392265	chr6_NUDT3-:E002:upstream	chr6	34347301	34347302	rs464553
chr6	34287192	34392265	chr6_NUDT3-:E001:downstream	chr6	34347301	34347302	rs464553
chr1	33349897	33354402	chr1_PHC2-:E008:upstream	chr1	33352812	33352813	rs4652856
chr1	33349897	33354402	chr1_PHC2-:E008:upstream	chr1	33354228	33354229	rs4653081
chr1	39105716	39157947	chr1_MACF1+:E007:downstream	chr1	39112859	39112860	rs4660165
chr1	39105716	39157947	chr1_MACF1+:E007:downstream	chr1	39126106	39126107	rs4660443
chr1	39205130	39213762	chr1_MACF1+:E009:downstream	chr1	39213317	39213318	rs4660543
chr1	39269719	39282209	chr1_MACF1+:E020:upstream	chr1	39270661	39270662	rs4660603
chr2	160318226	160367217	chr2_RBMS1-:E014:downstream	chr2	160327652	160327653	rs4664013
chr3	141438364	141442390	chr3_ZBTB38+:E027:upstream	chr3	141441528	141441529	rs4683404
chr3	141438364	141442390	chr3_ZBTB38+:E026:downstream	chr3	141441528	141441529	rs4683404
chr7	74658067	74689125	chr7_GTF2I+:E001:downstream	chr7	74672168	74672169	rs4717907
chr7	1816227	1898201	chr7_MAD1L1-:E002:downstream	chr7	1841890	1841891	rs4721098
chr7	1816227	1898201	chr7_MAD1L1-:E002:downstream	chr7	1892992	1892993	rs4721164
chr10	21929140	22003214	chr10_DNAJC1-:E014:upstream	chr10	21988389	21988390	rs4748775
chr10	21929140	22003214	chr10_DNAJC1-:E014:upstream	chr10	21988437	21988438	rs4748776
chr10	21929140	22003214	chr10_DNAJC1-:E014:upstream	chr10	21988798	21988799	rs4748777
chr10	21929140	22003214	chr10_DNAJC1-:E014:upstream	chr10	21999202	21999203	rs4748779
chr11	13277922	13309988	chr11_ARNTL+:E006:downstream	chr11	13285547	13285548	rs4757141
chr11	13277922	13309988	chr11_ARNTL+:E006:downstream	chr11	13304147	13304148	rs4757142
chr11	13277922	13309988	chr11_ARNTL+:E006:downstream	chr11	13309678	13309679	rs4757144
chr11	13277922	13309988	chr11_ARNTL+:E006:downstream	chr11	13309776	13309777	rs4757145
chr15	51782827	51798198	chr15_TMOD2+:E009:upstream	chr15	51795712	51795713	rs4775982
chr15	51798339	51806378	chr15_TMOD2+:E009:downstream	chr15	51799587	51799588	rs4775983
chr4	139730666	139889358	chr4_MAML3-:E004:upstream	chr4	139842969	139842970	rs4863692
chr4	139730666	139889358	chr4_MAML3-:E004:upstream	chr4	139886984	139886985	rs4863700
chr14	78988140	79279340	chr14_NRXN3+:E025:upstream	chr14	79125214	79125215	rs4899732
chr14	79280537	79467222	chr14_NRXN3+:E025:downstream	chr14	79382176	79382177	rs4899741
chr14	79280537	79467222	chr14_NRXN3+:E025:downstream	chr14	79408956	79408957	rs4899744
chr14	79280537	79467222	chr14_NRXN3+:E025:downstream	chr14	79458225	79458226	rs4899745
chr14	78988140	79279340	chr14_NRXN3+:E025:upstream	chr14	79059597	79059598	rs4903816
chr14	78988140	79279340	chr14_NRXN3+:E025:upstream	chr14	79067620	79067621	rs4903819
chr14	78988140	79279340	chr14_NRXN3+:E025:upstream	chr14	79067908	79067909	rs4903820
chr14	78988140	79279340	chr14_NRXN3+:E025:upstream	chr14	79069199	79069200	rs4903823
chr14	78988140	79279340	chr14_NRXN3+:E025:upstream	chr14	79100634	79100635	rs4903830
chr14	78988140	79279340	chr14_NRXN3+:E025:upstream	chr14	79119794	79119795	rs4903833
chr14	79280537	79467222	chr14_NRXN3+:E025:downstream	chr14	79388488	79388489	rs4903847
chr14	79280537	79467222	chr14_NRXN3+:E025:downstream	chr14	79388864	79388865	rs4903848
chr14	79280537	79467222	chr14_NRXN3+:E025:downstream	chr14	79404954	79404955	rs4903854
chr11	27412859	27472119	chr11_LGR4-:E018:upstream	chr11	27450048	27450049	rs4923445
chr15	41669957	41696076	chr15_MGA+:E014:upstream	chr15	41687473	41687474	rs4923908
chr11	122066433	122089104	chr11_MIR100HG-:E005:upstream	chr11	122071803	122071804	rs4936671
chr11	122066433	122089104	chr11_MIR100HG-:E004:downstream	chr11	122071803	122071804	rs4936671
chr11	85380378	85598658	chr11_DLG2-:E057:upstream	chr11	85555748	85555749	rs4943923
chr6	108664888	108679828	chr6_FOXO3+:E013:upstream	chr6	108679538	108679539	rs4946935
chr2	46699448	46758520	chr2_SOCS5+:E002:downstream	chr2	46730705	46730706	rs4952843
chr2	46699448	46758520	chr2_SOCS5+:E002:downstream	chr2	46757487	46757488	rs4953418
chr5	108367952	108380700	chr5_FBXL17-:E021:upstream	chr5	108368501	108368502	rs4957755
chr5	108367952	108380700	chr5_FBXL17-:E021:upstream	chr5	108378818	108378819	rs4957756
chr16	69910404	69917710	chr16_WWP2+:E022:upstream	chr16	69914593	69914594	rs4985377
chr16	69910404	69917710	chr16_WWP2+:E022:upstream	chr16	69915045	69915046	rs4985378
chr16	69910404	69917710	chr16_WWP2+:E022:upstream	chr16	69911237	69911238	rs4985452
chr16	69910404	69917710	chr16_WWP2+:E022:upstream	chr16	69915054	69915055	rs4985455
chr16	69917882	69924984	chr16_WWP2+:E022:downstream	chr16	69918753	69918754	rs4985456
chr1	39430907	39432536	chr1_MACF1+:E083:upstream	chr1	39431598	39431599	rs599823
chr1	39430907	39432536	chr1_MACF1+:E082:downstream	chr1	39431598	39431599	rs599823
chr20	25339350	25390514	chr20_ABHD12-:E018:upstream	chr20	25366584	25366585	rs6037097
chr20	25339350	25390514	chr20_ABHD12-:E018:upstream	chr20	25339591	25339592	rs6050544
chr20	25339350	25390514	chr20_ABHD12-:E018:upstream	chr20	25349278	25349279	rs6050559
chr20	25339350	25390514	chr20_ABHD12-:E018:upstream	chr20	25389281	25389282	rs6083828
chr6	34287192	34392265	chr6_NUDT3-:E002:upstream	chr6	34311622	34311623	rs611928
chr6	34287192	34392265	chr6_NUDT3-:E001:downstream	chr6	34311622	34311623	rs611928
chr1	39444834	39447433	chr1_MACF1+:E098:upstream	chr1	39445011	39445012	rs617577
chr1	39444834	39447433	chr1_MACF1+:E097:downstream	chr1	39445011	39445012	rs617577
chr13	75809182	75817162	chr13_LMO7+:E035:upstream	chr13	75811938	75811939	rs629443
chr4	30731215	30786728	chr4_PCDH7+:E005:downstream	chr4	30759906	30759907	rs6448723
chr10	63269222	63380319	chr10_JMJD1C-:E030:downstream	chr10	63367071	63367072	rs6479896
chr11	13277922	13309988	chr11_ARNTL+:E006:downstream	chr11	13298290	13298291	rs6486116
chr11	13277922	13309988	chr11_ARNTL+:E006:downstream	chr11	13302594	13302595	rs6486120
chr16	19861972	19871817	chr16_GPRC5B-:E004:upstream	chr16	19864769	19864770	rs6497415
chr16	19861972	19871817	chr16_GPRC5B-:E004:upstream	chr16	19864822	19864823	rs6497416
chr4	79907466	79976192	chr4_ANTXR2-:E002:downstream	chr4	79907966	79907967	rs6534642
chr4	139890966	140152861	chr4_MAML3-:E004:downstream	chr4	139941516	139941517	rs6536588
chr4	139890966	140152861	chr4_MAML3-:E004:downstream	chr4	139965351	139965352	rs6536603
chr14	78988140	79279340	chr14_NRXN3+:E025:upstream	chr14	79058038	79058039	rs6574478
chr14	78988140	79279340	chr14_NRXN3+:E025:upstream	chr14	79060497	79060498	rs6574480
chr14	78988140	79279340	chr14_NRXN3+:E025:upstream	chr14	79124448	79124449	rs6574492
chr14	78988140	79279340	chr14_NRXN3+:E025:upstream	chr14	79124617	79124618	rs6574493
chr14	78988140	79279340	chr14_NRXN3+:E025:upstream	chr14	79132930	79132931	rs6574495
chr14	79280537	79467222	chr14_NRXN3+:E025:downstream	chr14	79440221	79440222	rs6574507
chr12	110537094	110538145	chr12_PPTC7-:E002:downstream	chr12	110537869	110537870	rs6606689
chr10	21929140	22003214	chr10_DNAJC1-:E014:upstream	chr10	21991499	21991500	rs6650129
chr10	21929140	22003214	chr10_DNAJC1-:E014:upstream	chr10	21991734	21991735	rs6650130
chr2	160367390	160407465	chr2_RBMS1-:E017:upstream	chr2	160387561	160387562	rs6711540
chr2	160367390	160407465	chr2_RBMS1-:E017:upstream	chr2	160375504	160375505	rs6733297
chr3	81705612	81761376	chr3_GBE1-:E016:upstream	chr3	81707115	81707116	rs6795133
chr1	39429325	39429828	chr1_MACF1+:E081:upstream	chr1	39429608	39429609	rs682571
chr1	39429325	39429828	chr1_MACF1+:E080:downstream	chr1	39429608	39429609	rs682571
chr4	30731215	30786728	chr4_PCDH7+:E005:downstream	chr4	30763404	30763405	rs6828872
chr4	76195863	76213428	chr4_SCARB2-:E012:upstream	chr4	76196155	76196156	rs6835324
chr4	139730666	139889358	chr4_MAML3-:E004:upstream	chr4	139841265	139841266	rs6840907
chr4	30731215	30786728	chr4_PCDH7+:E005:downstream	chr4	30767362	30767363	rs6856144
chr5	154191024	154294817	chr5_GALNT10+:E001:downstream	chr5	154197960	154197961	rs6860445
chr6	34287192	34392265	chr6_NUDT3-:E002:upstream	chr6	34387880	34387881	rs6912971
chr6	34287192	34392265	chr6_NUDT3-:E001:downstream	chr6	34387880	34387881	rs6912971
chr6	34287192	34392265	chr6_NUDT3-:E002:upstream	chr6	34322755	34322756	rs6924682
chr6	34287192	34392265	chr6_NUDT3-:E001:downstream	chr6	34322755	34322756	rs6924682
chr6	34287192	34392265	chr6_NUDT3-:E002:upstream	chr6	34302890	34302891	rs6930978
chr6	34287192	34392265	chr6_NUDT3-:E001:downstream	chr6	34302890	34302891	rs6930978
chr7	1816227	1898201	chr7_MAD1L1-:E002:downstream	chr7	1894494	1894495	rs6951956
chr7	74658067	74689125	chr7_GTF2I+:E001:downstream	chr7	74687574	74687575	rs6964833
chr7	74658067	74689125	chr7_GTF2I+:E001:downstream	chr7	74684982	74684983	rs6967152
chr3	136502778	136518249	chr3_STAG1-:E032:upstream	chr3	136505854	136505855	rs699165
chr10	63269222	63380319	chr10_JMJD1C-:E030:downstream	chr10	63310677	63310678	rs7070296
chr10	63269222	63380319	chr10_JMJD1C-:E030:downstream	chr10	63290898	63290899	rs7075195
chr10	63269222	63380319	chr10_JMJD1C-:E030:downstream	chr10	63375911	63375912	rs7076310
chr10	63269222	63380319	chr10_JMJD1C-:E030:downstream	chr10	63288545	63288546	rs7080386
chr10	21929140	22003214	chr10_DNAJC1-:E014:upstream	chr10	21995210	21995211	rs7089656
chr11	13277922	13309988	chr11_ARNTL+:E006:downstream	chr11	13291421	13291422	rs7107287
chr4	52051790	52060420	chr4_SPATA18+:E003:downstream	chr4	52060049	52060050	rs711347
chr11	85380378	85598658	chr11_DLG2-:E057:upstream	chr11	85520430	85520431	rs7119372
chr14	79280537	79467222	chr14_NRXN3+:E025:downstream	chr14	79433110	79433111	rs7141420
chr14	78988140	79279340	chr14_NRXN3+:E025:upstream	chr14	79016035	79016036	rs7142308
chr14	79280537	79467222	chr14_NRXN3+:E025:downstream	chr14	79413329	79413330	rs714276
chr14	78988140	79279340	chr14_NRXN3+:E025:upstream	chr14	79120912	79120913	rs7149325
chr14	78988140	79279340	chr14_NRXN3+:E025:upstream	chr14	79147699	79147700	rs7151651
chr14	78988140	79279340	chr14_NRXN3+:E025:upstream	chr14	79143149	79143150	rs7154545
chr14	79280537	79467222	chr14_NRXN3+:E025:downstream	chr14	79428474	79428475	rs7154797
chr14	78988140	79279340	chr14_NRXN3+:E025:upstream	chr14	79057303	79057304	rs7155818
chr14	78988140	79279340	chr14_NRXN3+:E025:upstream	chr14	79145228	79145229	rs7156473
chr14	78988140	79279340	chr14_NRXN3+:E025:upstream	chr14	79057553	79057554	rs7157779
chr14	79280537	79467222	chr14_NRXN3+:E025:downstream	chr14	79425550	79425551	rs7159565
chr14	78988140	79279340	chr14_NRXN3+:E025:upstream	chr14	79087917	79087918	rs7161610
chr15	58787962	58802314	chr15_MINDY2+:E005:upstream	chr15	58788003	58788004	rs7169205
chr15	41669957	41696076	chr15_MGA+:E014:upstream	chr15	41690004	41690005	rs7169496
chr15	51798339	51806378	chr15_TMOD2+:E009:downstream	chr15	51802981	51802982	rs7170091
chr15	41669957	41696076	chr15_MGA+:E014:upstream	chr15	41679014	41679015	rs7178205
chr11	85380378	85598658	chr11_DLG2-:E057:upstream	chr11	85447622	85447623	rs720496
chr19	4048243	4053972	chr19_ZBTB7A-:E004:upstream	chr19	4053014	4053015	rs7245642
chr16	19872845	19882133	chr16_GPRC5B-:E004:downstream	chr16	19874417	19874418	rs724615
chr19	4013348	4024037	chr19_PIAS4+:E003:downstream	chr19	4016006	4016007	rs7258309
chr11	13277922	13309988	chr11_ARNTL+:E006:downstream	chr11	13307431	13307432	rs7396943
chr1	33371093	33372290	chr1_PHC2-:E014:downstream	chr1	33371194	33371195	rs7545416
chr11	47410394	47411927	chr11_SLC39A13+:E010:upstream	chr11	47410751	47410752	rs755553
chr11	47410394	47411927	chr11_SLC39A13+:E010:upstream	chr11	47410482	47410483	rs755554
chr1	8656440	8703056	chr1_RERE-:E026:upstream	chr1	8681341	8681342	rs7556169
chr4	101197387	101346740	chr4_PPP3CA-:E017:upstream	chr4	101278708	101278709	rs755961
chr2	46699448	46758520	chr2_SOCS5+:E002:downstream	chr2	46749077	46749078	rs7562173
chr16	72960193	73047753	chr16_ZFHX3-:E010:downstream	chr16	72962262	72962263	rs756717
chr2	46699448	46758520	chr2_SOCS5+:E002:downstream	chr2	46746260	46746261	rs7584870
chr2	160367390	160407465	chr2_RBMS1-:E017:upstream	chr2	160402770	160402771	rs7587102
chr2	46699448	46758520	chr2_SOCS5+:E002:downstream	chr2	46708651	46708652	rs7594523
chr3	81705612	81761376	chr3_GBE1-:E016:upstream	chr3	81713635	81713636	rs7620240
chr3	141438364	141442390	chr3_ZBTB38+:E027:upstream	chr3	141442039	141442040	rs7626871
chr3	141438364	141442390	chr3_ZBTB38+:E026:downstream	chr3	141442039	141442040	rs7626871
chr3	81705612	81761376	chr3_GBE1-:E016:upstream	chr3	81749948	81749949	rs7634258
chr3	107526397	107599076	chr3_BBX+:E014:upstream	chr3	107576797	107576798	rs7639376
chr12	754323	813643	chr12_WNK1+:E004:downstream	chr12	799116	799117	rs765250
chr4	30731215	30786728	chr4_PCDH7+:E005:downstream	chr4	30753011	30753012	rs7670155
chr4	30731215	30786728	chr4_PCDH7+:E005:downstream	chr4	30749066	30749067	rs7695488
chr4	139890966	140152861	chr4_MAML3-:E004:downstream	chr4	139956504	139956505	rs769657
chr4	139890966	140152861	chr4_MAML3-:E004:downstream	chr4	139948781	139948782	rs769661
chr4	139890966	140152861	chr4_MAML3-:E004:downstream	chr4	139963038	139963039	rs769669
chr4	139890966	140152861	chr4_MAML3-:E004:downstream	chr4	139962950	139962951	rs769670
chr4	139890966	140152861	chr4_MAML3-:E004:downstream	chr4	139962463	139962464	rs769671
chr4	139890966	140152861	chr4_MAML3-:E004:downstream	chr4	139960809	139960810	rs769674
chr4	139730666	139889358	chr4_MAML3-:E004:upstream	chr4	139846255	139846256	rs7698436
chr5	154191024	154294817	chr5_GALNT10+:E001:downstream	chr5	154213291	154213292	rs7716370
chr7	69599961	69824666	chr7_AUTS2+:E002:downstream	chr7	69822458	69822459	rs7801117
chr4	52051790	52060420	chr4_SPATA18+:E003:downstream	chr4	52055287	52055288	rs784942
chr4	52051790	52060420	chr4_SPATA18+:E003:downstream	chr4	52057038	52057039	rs784943
chr9	33817933	33886882	chr9_UBE2R2+:E002:downstream	chr9	33870941	33870942	rs7856487
chr10	74109155	74111910	chr10_VCL+:E019:upstream	chr10	74109995	74109996	rs7909664
chr10	63269222	63380319	chr10_JMJD1C-:E030:downstream	chr10	63379149	63379150	rs7910927
chr10	63269222	63380319	chr10_JMJD1C-:E030:downstream	chr10	63374061	63374062	rs7923609
chr11	131370887	131581927	chr11_NTM+:E002:downstream	chr11	131579470	131579471	rs7925725
chr11	131370887	131581927	chr11_NTM+:E002:downstream	chr11	131579544	131579545	rs7925748
chr11	85380378	85598658	chr11_DLG2-:E057:upstream	chr11	85573361	85573362	rs7948778
chr11	13277922	13309988	chr11_ARNTL+:E006:downstream	chr11	13298346	13298347	rs7949336
chr11	85380378	85598658	chr11_DLG2-:E057:upstream	chr11	85539960	85539961	rs7949567
chr11	13277922	13309988	chr11_ARNTL+:E006:downstream	chr11	13296883	13296884	rs7951393
chr4	139730666	139889358	chr4_MAML3-:E004:upstream	chr4	139880511	139880512	rs795980
chr4	139890966	140152861	chr4_MAML3-:E004:downstream	chr4	139946359	139946360	rs797090
chr14	78988140	79279340	chr14_NRXN3+:E025:upstream	chr14	79097592	79097593	rs8004582
chr14	78988140	79279340	chr14_NRXN3+:E025:upstream	chr14	79097310	79097311	rs8005334
chr14	78988140	79279340	chr14_NRXN3+:E025:upstream	chr14	79054652	79054653	rs8006615
chr14	78988140	79279340	chr14_NRXN3+:E025:upstream	chr14	79041133	79041134	rs8006983
chr14	78988140	79279340	chr14_NRXN3+:E025:upstream	chr14	79041469	79041470	rs8007813
chr14	78988140	79279340	chr14_NRXN3+:E025:upstream	chr14	79041264	79041265	rs8008393
chr14	78988140	79279340	chr14_NRXN3+:E025:upstream	chr14	79125666	79125667	rs8009383
chr14	78988140	79279340	chr14_NRXN3+:E025:upstream	chr14	79068448	79068449	rs8010365
chr14	78988140	79279340	chr14_NRXN3+:E025:upstream	chr14	79068565	79068566	rs8010673
chr14	78988140	79279340	chr14_NRXN3+:E025:upstream	chr14	79047582	79047583	rs8011832
chr14	78988140	79279340	chr14_NRXN3+:E025:upstream	chr14	79017889	79017890	rs8016232
chr14	78988140	79279340	chr14_NRXN3+:E025:upstream	chr14	79039559	79039560	rs8016756
chr14	78988140	79279340	chr14_NRXN3+:E025:upstream	chr14	79039199	79039200	rs8017018
chr14	79280537	79467222	chr14_NRXN3+:E025:downstream	chr14	79437062	79437063	rs8017403
chr15	51782827	51798198	chr15_TMOD2+:E009:upstream	chr15	51784198	51784199	rs8028922
chr12	89351024	89351641	chr12_DUSP6-:E004:upstream	chr12	89351048	89351049	rs808820
chr3	93928796	93973675	chr3_PROS1-:E016:upstream	chr3	93962644	93962645	rs8178591
chr3	93928796	93973675	chr3_PROS1-:E016:upstream	chr3	93935147	93935148	rs8178607
chr14	103715978	103726793	chr14_ZFYVE21+:E001:downstream	chr14	103716660	103716661	rs861528
chr14	78988140	79279340	chr14_NRXN3+:E025:upstream	chr14	79025566	79025567	rs872483
chr8	15540567	15623081	chr8_TUSC3+:E001:downstream	chr8	15545788	15545789	rs882696
chr5	154191024	154294817	chr5_GALNT10+:E001:downstream	chr5	154194377	154194378	rs890793
chr19	4055513	4064249	chr19_ZBTB7A-:E006:upstream	chr19	4060708	4060709	rs895330
chr2	46699448	46758520	chr2_SOCS5+:E002:downstream	chr2	46721035	46721036	rs897529
chr2	46699448	46758520	chr2_SOCS5+:E002:downstream	chr2	46721010	46721011	rs897530
chr16	69917882	69924984	chr16_WWP2+:E022:downstream	chr16	69924591	69924592	rs904808
chr16	69910404	69917710	chr16_WWP2+:E022:upstream	chr16	69917387	69917388	rs904809
chr16	69910404	69917710	chr16_WWP2+:E022:upstream	chr16	69916752	69916753	rs904810
chr1	11069729	11070901	chr1_EXOSC10-:E007:upstream	chr1	11070585	11070586	rs910660
chr4	101197387	101346740	chr4_PPP3CA-:E017:upstream	chr4	101297557	101297558	rs920559
chr3	107526397	107599076	chr3_BBX+:E014:upstream	chr3	107598090	107598091	rs9288851
chr4	30731215	30786728	chr4_PCDH7+:E005:downstream	chr4	30761288	30761289	rs9291549
chr14	78988140	79279340	chr14_NRXN3+:E025:upstream	chr14	79046382	79046383	rs9323670
chr14	78988140	79279340	chr14_NRXN3+:E025:upstream	chr14	79046829	79046830	rs9323671
chr7	69599961	69824666	chr7_AUTS2+:E002:downstream	chr7	69820990	69820991	rs9332399
chr6	26159201	26170976	chr6_HIST1H2BD+:E005:upstream	chr6	26167384	26167385	rs9366639
chr14	78988140	79279340	chr14_NRXN3+:E025:upstream	chr14	79067943	79067944	rs937648
chr6	108664888	108679828	chr6_FOXO3+:E013:upstream	chr6	108673622	108673623	rs9398172
chr14	79280537	79467222	chr14_NRXN3+:E025:downstream	chr14	79413993	79413994	rs954860
chr3	136518414	136521214	chr3_STAG1-:E032:downstream	chr3	136520017	136520018	rs9812319
chr3	107526397	107599076	chr3_BBX+:E014:upstream	chr3	107538511	107538512	rs9837251
chr3	107526397	107599076	chr3_BBX+:E014:upstream	chr3	107569162	107569163	rs9842211
chr3	107526397	107599076	chr3_BBX+:E014:upstream	chr3	107547575	107547576	rs9857190
chr3	107526397	107599076	chr3_BBX+:E014:upstream	chr3	107549761	107549762	rs9868075
chr3	107526397	107599076	chr3_BBX+:E014:upstream	chr3	107547911	107547912	rs9877739
chr3	136518414	136521214	chr3_STAG1-:E032:downstream	chr3	136518730	136518731	rs9878078
chr3	107526397	107599076	chr3_BBX+:E014:upstream	chr3	107564967	107564968	rs9882331
chr14	78988140	79279340	chr14_NRXN3+:E025:upstream	chr14	79078136	79078137	rs997842
chr17	48908819	48910809	chr17_UBE2Z+:E001:downstream	chr17	48910302	48910303	rs999474
chr17	48908819	48910809	chr17_UBE2Z+:E001:downstream	chr17	48910681	48910682	rs999475
chr4	30731215	30786728	chr4_PCDH7+:E005:downstream	chr4	30770861	30770862	rs9999290

## Sheet: T2D lean conf vs day 3
exon_chr	exon_start	exon_end	exon_name	snp_chr	snp_start	snp_end	snp_name
chr1	120029986	120069335	chr1_NOTCH2-:E035:upstream	chr1	120035492	120035493	1-120578116
chr1	39084437	39105380	chr1_MACF1+:E007:upstream	chr1	39084948	39084949	1-39550621
chr1	39084437	39105380	chr1_MACF1+:E006:downstream	chr1	39084948	39084949	1-39550621
chr1	39084437	39105380	chr1_MACF1+:E007:upstream	chr1	39085815	39085816	1-39551488
chr1	39084437	39105380	chr1_MACF1+:E006:downstream	chr1	39085815	39085816	1-39551488
chr1	39084437	39105380	chr1_MACF1+:E007:upstream	chr1	39087290	39087291	1-39552963
chr1	39084437	39105380	chr1_MACF1+:E006:downstream	chr1	39087290	39087291	1-39552963
chr1	39084437	39105380	chr1_MACF1+:E007:upstream	chr1	39088361	39088362	1-39554034
chr1	39084437	39105380	chr1_MACF1+:E006:downstream	chr1	39088361	39088362	1-39554034
chr1	39084437	39105380	chr1_MACF1+:E007:upstream	chr1	39094577	39094578	1-39560250
chr1	39084437	39105380	chr1_MACF1+:E006:downstream	chr1	39094577	39094578	1-39560250
chr1	39084437	39105380	chr1_MACF1+:E007:upstream	chr1	39096954	39096955	1-39562627
chr1	39084437	39105380	chr1_MACF1+:E006:downstream	chr1	39096954	39096955	1-39562627
chr1	39084437	39105380	chr1_MACF1+:E007:upstream	chr1	39099257	39099258	1-39564930
chr1	39084437	39105380	chr1_MACF1+:E006:downstream	chr1	39099257	39099258	1-39564930
chr1	39084437	39105380	chr1_MACF1+:E007:upstream	chr1	39101093	39101094	1-39566766
chr1	39084437	39105380	chr1_MACF1+:E006:downstream	chr1	39101093	39101094	1-39566766
chr1	39084437	39105380	chr1_MACF1+:E007:upstream	chr1	39103898	39103899	1-39569571
chr1	39084437	39105380	chr1_MACF1+:E006:downstream	chr1	39103898	39103899	1-39569571
chr1	39105716	39157947	chr1_MACF1+:E007:downstream	chr1	39106319	39106320	1-39571992
chr1	39105716	39157947	chr1_MACF1+:E007:downstream	chr1	39107546	39107547	1-39573219
chr1	39105716	39157947	chr1_MACF1+:E007:downstream	chr1	39110309	39110310	1-39575982
chr1	39105716	39157947	chr1_MACF1+:E007:downstream	chr1	39110948	39110949	1-39576621
chr1	39105716	39157947	chr1_MACF1+:E007:downstream	chr1	39112859	39112860	1-39578532
chr1	39105716	39157947	chr1_MACF1+:E007:downstream	chr1	39113313	39113314	1-39578986
chr1	39105716	39157947	chr1_MACF1+:E007:downstream	chr1	39121605	39121606	1-39587278
chr1	39105716	39157947	chr1_MACF1+:E007:downstream	chr1	39121715	39121716	1-39587388
chr1	39105716	39157947	chr1_MACF1+:E007:downstream	chr1	39123294	39123295	1-39588967
chr1	39105716	39157947	chr1_MACF1+:E007:downstream	chr1	39124736	39124737	1-39590409
chr1	39105716	39157947	chr1_MACF1+:E007:downstream	chr1	39126106	39126107	1-39591779
chr1	39105716	39157947	chr1_MACF1+:E007:downstream	chr1	39128429	39128430	1-39594102
chr1	39105716	39157947	chr1_MACF1+:E007:downstream	chr1	39130464	39130465	1-39596137
chr1	39105716	39157947	chr1_MACF1+:E007:downstream	chr1	39137082	39137083	1-39602755
chr1	39105716	39157947	chr1_MACF1+:E007:downstream	chr1	39137541	39137542	1-39603214
chr1	39105716	39157947	chr1_MACF1+:E007:downstream	chr1	39139418	39139419	1-39605091
chr1	39105716	39157947	chr1_MACF1+:E007:downstream	chr1	39144111	39144112	1-39609784
chr1	39105716	39157947	chr1_MACF1+:E007:downstream	chr1	39146567	39146568	1-39612240
chr1	39105716	39157947	chr1_MACF1+:E007:downstream	chr1	39146820	39146821	1-39612493
chr1	39105716	39157947	chr1_MACF1+:E007:downstream	chr1	39146884	39146885	1-39612557
chr1	39105716	39157947	chr1_MACF1+:E007:downstream	chr1	39148139	39148140	1-39613812
chr1	39105716	39157947	chr1_MACF1+:E007:downstream	chr1	39150609	39150610	1-39616282
chr1	39105716	39157947	chr1_MACF1+:E007:downstream	chr1	39151017	39151018	1-39616690
chr1	39105716	39157947	chr1_MACF1+:E007:downstream	chr1	39151407	39151408	1-39617080
chr1	39105716	39157947	chr1_MACF1+:E007:downstream	chr1	39152883	39152884	1-39618556
chr1	39105716	39157947	chr1_MACF1+:E007:downstream	chr1	39155284	39155285	1-39620957
chr1	39105716	39157947	chr1_MACF1+:E007:downstream	chr1	39155879	39155880	1-39621552
chr1	39105716	39157947	chr1_MACF1+:E007:downstream	chr1	39156915	39156916	1-39622588
chr1	39105716	39157947	chr1_MACF1+:E007:downstream	chr1	39157150	39157151	1-39622823
chr1	39105716	39157947	chr1_MACF1+:E007:downstream	chr1	39157634	39157635	1-39623307
chr1	39159019	39204303	chr1_MACF1+:E009:upstream	chr1	39160969	39160970	1-39626642
chr1	39159019	39204303	chr1_MACF1+:E009:upstream	chr1	39162738	39162739	1-39628411
chr1	39159019	39204303	chr1_MACF1+:E009:upstream	chr1	39163207	39163208	1-39628880
chr1	39159019	39204303	chr1_MACF1+:E009:upstream	chr1	39163389	39163390	1-39629062
chr1	39159019	39204303	chr1_MACF1+:E009:upstream	chr1	39165624	39165625	1-39631297
chr1	39159019	39204303	chr1_MACF1+:E009:upstream	chr1	39171228	39171229	1-39636901
chr1	39159019	39204303	chr1_MACF1+:E009:upstream	chr1	39171632	39171633	1-39637305
chr1	39159019	39204303	chr1_MACF1+:E009:upstream	chr1	39173980	39173981	1-39639653
chr1	39159019	39204303	chr1_MACF1+:E009:upstream	chr1	39174071	39174072	1-39639744
chr1	39159019	39204303	chr1_MACF1+:E009:upstream	chr1	39177709	39177710	1-39643382
chr1	39159019	39204303	chr1_MACF1+:E009:upstream	chr1	39177791	39177792	1-39643464
chr1	39159019	39204303	chr1_MACF1+:E009:upstream	chr1	39178039	39178040	1-39643712
chr1	39159019	39204303	chr1_MACF1+:E009:upstream	chr1	39181114	39181115	1-39646787
chr1	39159019	39204303	chr1_MACF1+:E009:upstream	chr1	39181365	39181366	1-39647038
chr1	39159019	39204303	chr1_MACF1+:E009:upstream	chr1	39181947	39181948	1-39647620
chr1	39159019	39204303	chr1_MACF1+:E009:upstream	chr1	39183525	39183526	1-39649198
chr1	39159019	39204303	chr1_MACF1+:E009:upstream	chr1	39187091	39187092	1-39652764
chr1	39159019	39204303	chr1_MACF1+:E009:upstream	chr1	39188321	39188322	1-39653994
chr1	39159019	39204303	chr1_MACF1+:E009:upstream	chr1	39188699	39188700	1-39654372
chr1	39159019	39204303	chr1_MACF1+:E009:upstream	chr1	39190728	39190729	1-39656401
chr1	39159019	39204303	chr1_MACF1+:E009:upstream	chr1	39195174	39195175	1-39660847
chr1	39159019	39204303	chr1_MACF1+:E009:upstream	chr1	39196835	39196836	1-39662508
chr1	39159019	39204303	chr1_MACF1+:E009:upstream	chr1	39196929	39196930	1-39662602
chr1	39159019	39204303	chr1_MACF1+:E009:upstream	chr1	39196945	39196946	1-39662618
chr1	39159019	39204303	chr1_MACF1+:E009:upstream	chr1	39199009	39199010	1-39664682
chr1	39159019	39204303	chr1_MACF1+:E009:upstream	chr1	39202342	39202343	1-39668015
chr1	39159019	39204303	chr1_MACF1+:E009:upstream	chr1	39203009	39203010	1-39668682
chr1	39159019	39204303	chr1_MACF1+:E009:upstream	chr1	39203864	39203865	1-39669537
chr1	39205130	39213762	chr1_MACF1+:E009:downstream	chr1	39205819	39205820	1-39671492
chr1	39205130	39213762	chr1_MACF1+:E009:downstream	chr1	39206872	39206873	1-39672545
chr1	39205130	39213762	chr1_MACF1+:E009:downstream	chr1	39208915	39208916	1-39674588
chr1	39205130	39213762	chr1_MACF1+:E009:downstream	chr1	39209649	39209650	1-39675322
chr1	39205130	39213762	chr1_MACF1+:E009:downstream	chr1	39213317	39213318	1-39678990
chr1	39205130	39213762	chr1_MACF1+:E009:downstream	chr1	39213729	39213730	1-39679402
chr1	39231242	39250015	chr1_MACF1+:E015:upstream	chr1	39233441	39233442	1-39699114
chr1	39231242	39250015	chr1_MACF1+:E014:downstream	chr1	39233441	39233442	1-39699114
chr1	39231242	39250015	chr1_MACF1+:E015:upstream	chr1	39233571	39233572	1-39699244
chr1	39231242	39250015	chr1_MACF1+:E014:downstream	chr1	39233571	39233572	1-39699244
chr1	39231242	39250015	chr1_MACF1+:E015:upstream	chr1	39238174	39238175	1-39703847
chr1	39231242	39250015	chr1_MACF1+:E014:downstream	chr1	39238174	39238175	1-39703847
chr1	39231242	39250015	chr1_MACF1+:E015:upstream	chr1	39239785	39239786	1-39705458
chr1	39231242	39250015	chr1_MACF1+:E014:downstream	chr1	39239785	39239786	1-39705458
chr1	39231242	39250015	chr1_MACF1+:E015:upstream	chr1	39242629	39242630	1-39708302
chr1	39231242	39250015	chr1_MACF1+:E014:downstream	chr1	39242629	39242630	1-39708302
chr1	39231242	39250015	chr1_MACF1+:E015:upstream	chr1	39243030	39243031	1-39708703
chr1	39231242	39250015	chr1_MACF1+:E014:downstream	chr1	39243030	39243031	1-39708703
chr1	39231242	39250015	chr1_MACF1+:E015:upstream	chr1	39244786	39244787	1-39710459
chr1	39231242	39250015	chr1_MACF1+:E014:downstream	chr1	39244786	39244787	1-39710459
chr1	39231242	39250015	chr1_MACF1+:E015:upstream	chr1	39246257	39246258	1-39711930
chr1	39231242	39250015	chr1_MACF1+:E014:downstream	chr1	39246257	39246258	1-39711930
chr1	39231242	39250015	chr1_MACF1+:E015:upstream	chr1	39247440	39247441	1-39713113
chr1	39231242	39250015	chr1_MACF1+:E014:downstream	chr1	39247440	39247441	1-39713113
chr1	39231242	39250015	chr1_MACF1+:E015:upstream	chr1	39247975	39247976	1-39713648
chr1	39231242	39250015	chr1_MACF1+:E014:downstream	chr1	39247975	39247976	1-39713648
chr1	39231242	39250015	chr1_MACF1+:E015:upstream	chr1	39248187	39248188	1-39713860
chr1	39231242	39250015	chr1_MACF1+:E014:downstream	chr1	39248187	39248188	1-39713860
chr1	39231242	39250015	chr1_MACF1+:E015:upstream	chr1	39248565	39248566	1-39714238
chr1	39231242	39250015	chr1_MACF1+:E014:downstream	chr1	39248565	39248566	1-39714238
chr1	39250102	39251847	chr1_MACF1+:E015:downstream	chr1	39251229	39251230	1-39716902
chr1	39250102	39251847	chr1_MACF1+:E015:downstream	chr1	39251583	39251584	1-39717256
chr1	39269719	39282209	chr1_MACF1+:E020:upstream	chr1	39270661	39270662	1-39736334
chr1	39269719	39282209	chr1_MACF1+:E020:upstream	chr1	39275847	39275848	1-39741520
chr1	39269719	39282209	chr1_MACF1+:E020:upstream	chr1	39277196	39277197	1-39742869
chr1	39269719	39282209	chr1_MACF1+:E020:upstream	chr1	39278945	39278946	1-39744618
chr1	39269719	39282209	chr1_MACF1+:E020:upstream	chr1	39279935	39279936	1-39745608
chr1	39282373	39283190	chr1_MACF1+:E021:upstream	chr1	39282598	39282599	1-39748271
chr1	39282373	39283190	chr1_MACF1+:E020:downstream	chr1	39282598	39282599	1-39748271
chr1	39282373	39283190	chr1_MACF1+:E021:upstream	chr1	39282866	39282867	1-39748539
chr1	39282373	39283190	chr1_MACF1+:E020:downstream	chr1	39282866	39282867	1-39748539
chr1	39282373	39283190	chr1_MACF1+:E021:upstream	chr1	39282989	39282990	1-39748662
chr1	39282373	39283190	chr1_MACF1+:E020:downstream	chr1	39282989	39282990	1-39748662
chr1	39287561	39291911	chr1_MACF1+:E029:upstream	chr1	39290644	39290645	1-39756317
chr1	39287561	39291911	chr1_MACF1+:E028:downstream	chr1	39290644	39290645	1-39756317
chr1	39292037	39292767	chr1_MACF1+:E030:upstream	chr1	39292126	39292127	1-39757799
chr1	39292037	39292767	chr1_MACF1+:E029:downstream	chr1	39292126	39292127	1-39757799
chr1	39292842	39293459	chr1_MACF1+:E031:upstream	chr1	39292961	39292962	1-39758634
chr1	39292842	39293459	chr1_MACF1+:E030:downstream	chr1	39292961	39292962	1-39758634
chr1	39292842	39293459	chr1_MACF1+:E031:upstream	chr1	39293282	39293283	1-39758955
chr1	39292842	39293459	chr1_MACF1+:E030:downstream	chr1	39293282	39293283	1-39758955
chr1	39292842	39293459	chr1_MACF1+:E031:upstream	chr1	39293320	39293321	1-39758993
chr1	39292842	39293459	chr1_MACF1+:E030:downstream	chr1	39293320	39293321	1-39758993
chr1	39295881	39297621	chr1_MACF1+:E034:upstream	chr1	39296530	39296531	1-39762203
chr1	39295881	39297621	chr1_MACF1+:E033:downstream	chr1	39296530	39296531	1-39762203
chr1	39295881	39297621	chr1_MACF1+:E034:upstream	chr1	39297216	39297217	1-39762889
chr1	39295881	39297621	chr1_MACF1+:E033:downstream	chr1	39297216	39297217	1-39762889
chr1	39295881	39297621	chr1_MACF1+:E034:upstream	chr1	39297569	39297570	1-39763242
chr1	39295881	39297621	chr1_MACF1+:E033:downstream	chr1	39297569	39297570	1-39763242
chr1	39300361	39302925	chr1_MACF1+:E036:upstream	chr1	39300368	39300369	1-39766041
chr1	39300361	39302925	chr1_MACF1+:E035:downstream	chr1	39300368	39300369	1-39766041
chr1	39300361	39302925	chr1_MACF1+:E036:upstream	chr1	39300382	39300383	1-39766055
chr1	39300361	39302925	chr1_MACF1+:E035:downstream	chr1	39300382	39300383	1-39766055
chr1	39300361	39302925	chr1_MACF1+:E036:upstream	chr1	39300976	39300977	1-39766649
chr1	39300361	39302925	chr1_MACF1+:E035:downstream	chr1	39300976	39300977	1-39766649
chr1	39303077	39309571	chr1_MACF1+:E037:upstream	chr1	39303327	39303328	1-39769000
chr1	39303077	39309571	chr1_MACF1+:E036:downstream	chr1	39303327	39303328	1-39769000
chr1	39303077	39309571	chr1_MACF1+:E037:upstream	chr1	39304554	39304555	1-39770227
chr1	39303077	39309571	chr1_MACF1+:E036:downstream	chr1	39304554	39304555	1-39770227
chr1	39303077	39309571	chr1_MACF1+:E037:upstream	chr1	39304605	39304606	1-39770278
chr1	39303077	39309571	chr1_MACF1+:E036:downstream	chr1	39304605	39304606	1-39770278
chr1	39303077	39309571	chr1_MACF1+:E037:upstream	chr1	39306397	39306398	1-39772070
chr1	39303077	39309571	chr1_MACF1+:E036:downstream	chr1	39306397	39306398	1-39772070
chr1	39310999	39315514	chr1_MACF1+:E040:upstream	chr1	39311486	39311487	1-39777159
chr1	39310999	39315514	chr1_MACF1+:E039:downstream	chr1	39311486	39311487	1-39777159
chr1	39310999	39315514	chr1_MACF1+:E040:upstream	chr1	39314129	39314130	1-39779802
chr1	39310999	39315514	chr1_MACF1+:E039:downstream	chr1	39314129	39314130	1-39779802
chr1	39318614	39319665	chr1_MACF1+:E043:downstream	chr1	39319215	39319216	1-39784888
chr1	39324733	39327219	chr1_MACF1+:E049:upstream	chr1	39326203	39326204	1-39791876
chr1	39324733	39327219	chr1_MACF1+:E048:downstream	chr1	39326203	39326204	1-39791876
chr1	39337330	39340503	chr1_MACF1+:E053:upstream	chr1	39337894	39337895	1-39803567
chr1	39337330	39340503	chr1_MACF1+:E052:downstream	chr1	39337894	39337895	1-39803567
chr1	39340952	39346978	chr1_MACF1+:E055:upstream	chr1	39341345	39341346	1-39807018
chr1	39340952	39346978	chr1_MACF1+:E054:downstream	chr1	39341345	39341346	1-39807018
chr1	39340952	39346978	chr1_MACF1+:E055:upstream	chr1	39341785	39341786	1-39807458
chr1	39340952	39346978	chr1_MACF1+:E054:downstream	chr1	39341785	39341786	1-39807458
chr1	39340952	39346978	chr1_MACF1+:E055:upstream	chr1	39343611	39343612	1-39809284
chr1	39340952	39346978	chr1_MACF1+:E054:downstream	chr1	39343611	39343612	1-39809284
chr1	39340952	39346978	chr1_MACF1+:E055:upstream	chr1	39345532	39345533	1-39811205
chr1	39340952	39346978	chr1_MACF1+:E054:downstream	chr1	39345532	39345533	1-39811205
chr1	39340952	39346978	chr1_MACF1+:E055:upstream	chr1	39346761	39346762	1-39812434
chr1	39340952	39346978	chr1_MACF1+:E054:downstream	chr1	39346761	39346762	1-39812434
chr1	39340952	39346978	chr1_MACF1+:E055:upstream	chr1	39346845	39346846	1-39812518
chr1	39340952	39346978	chr1_MACF1+:E054:downstream	chr1	39346845	39346846	1-39812518
chr1	39347209	39349479	chr1_MACF1+:E057:upstream	chr1	39349287	39349288	1-39814960
chr1	39347209	39349479	chr1_MACF1+:E056:downstream	chr1	39349287	39349288	1-39814960
chr1	39347209	39349479	chr1_MACF1+:E057:upstream	chr1	39349470	39349471	1-39815143
chr1	39347209	39349479	chr1_MACF1+:E056:downstream	chr1	39349470	39349471	1-39815143
chr1	39349626	39350786	chr1_MACF1+:E058:upstream	chr1	39349671	39349672	1-39815344
chr1	39349626	39350786	chr1_MACF1+:E057:downstream	chr1	39349671	39349672	1-39815344
chr1	39351017	39353008	chr1_MACF1+:E059:upstream	chr1	39351268	39351269	1-39816941
chr1	39351017	39353008	chr1_MACF1+:E058:downstream	chr1	39351268	39351269	1-39816941
chr1	39351017	39353008	chr1_MACF1+:E059:upstream	chr1	39352379	39352380	1-39818052
chr1	39351017	39353008	chr1_MACF1+:E058:downstream	chr1	39352379	39352380	1-39818052
chr1	39353230	39357376	chr1_MACF1+:E060:upstream	chr1	39353830	39353831	1-39819503
chr1	39353230	39357376	chr1_MACF1+:E059:downstream	chr1	39353830	39353831	1-39819503
chr1	39353230	39357376	chr1_MACF1+:E060:upstream	chr1	39354465	39354466	1-39820138
chr1	39353230	39357376	chr1_MACF1+:E059:downstream	chr1	39354465	39354466	1-39820138
chr1	39353230	39357376	chr1_MACF1+:E060:upstream	chr1	39354637	39354638	1-39820310
chr1	39353230	39357376	chr1_MACF1+:E059:downstream	chr1	39354637	39354638	1-39820310
chr1	39353230	39357376	chr1_MACF1+:E060:upstream	chr1	39355253	39355254	1-39820926
chr1	39353230	39357376	chr1_MACF1+:E059:downstream	chr1	39355253	39355254	1-39820926
chr1	39353230	39357376	chr1_MACF1+:E060:upstream	chr1	39355290	39355291	1-39820963
chr1	39353230	39357376	chr1_MACF1+:E059:downstream	chr1	39355290	39355291	1-39820963
chr1	39353230	39357376	chr1_MACF1+:E060:upstream	chr1	39356008	39356009	1-39821681
chr1	39353230	39357376	chr1_MACF1+:E059:downstream	chr1	39356008	39356009	1-39821681
chr1	39353230	39357376	chr1_MACF1+:E060:upstream	chr1	39356064	39356065	1-39821737
chr1	39353230	39357376	chr1_MACF1+:E059:downstream	chr1	39356064	39356065	1-39821737
chr1	39358872	39359142	chr1_MACF1+:E062:upstream	chr1	39359045	39359046	1-39824718
chr1	39358872	39359142	chr1_MACF1+:E061:downstream	chr1	39359045	39359046	1-39824718
chr1	39359263	39360794	chr1_MACF1+:E063:upstream	chr1	39359765	39359766	1-39825438
chr1	39359263	39360794	chr1_MACF1+:E062:downstream	chr1	39359765	39359766	1-39825438
chr1	39359263	39360794	chr1_MACF1+:E063:upstream	chr1	39360332	39360333	1-39826005
chr1	39359263	39360794	chr1_MACF1+:E062:downstream	chr1	39360332	39360333	1-39826005
chr1	39361676	39368149	chr1_MACF1+:E065:upstream	chr1	39366095	39366096	1-39831768
chr1	39361676	39368149	chr1_MACF1+:E064:downstream	chr1	39366095	39366096	1-39831768
chr1	39361676	39368149	chr1_MACF1+:E065:upstream	chr1	39366734	39366735	1-39832407
chr1	39361676	39368149	chr1_MACF1+:E064:downstream	chr1	39366734	39366735	1-39832407
chr1	39361676	39368149	chr1_MACF1+:E065:upstream	chr1	39367800	39367801	1-39833473
chr1	39361676	39368149	chr1_MACF1+:E064:downstream	chr1	39367800	39367801	1-39833473
chr1	39361676	39368149	chr1_MACF1+:E065:upstream	chr1	39367830	39367831	1-39833503
chr1	39361676	39368149	chr1_MACF1+:E064:downstream	chr1	39367830	39367831	1-39833503
chr1	39361676	39368149	chr1_MACF1+:E065:upstream	chr1	39367862	39367863	1-39833535
chr1	39361676	39368149	chr1_MACF1+:E064:downstream	chr1	39367862	39367863	1-39833535
chr1	39368313	39370031	chr1_MACF1+:E066:upstream	chr1	39368944	39368945	1-39834617
chr1	39368313	39370031	chr1_MACF1+:E065:downstream	chr1	39368944	39368945	1-39834617
chr1	39368313	39370031	chr1_MACF1+:E066:upstream	chr1	39369867	39369868	1-39835540
chr1	39368313	39370031	chr1_MACF1+:E065:downstream	chr1	39369867	39369868	1-39835540
chr1	39370185	39372480	chr1_MACF1+:E067:upstream	chr1	39371429	39371430	1-39837102
chr1	39370185	39372480	chr1_MACF1+:E066:downstream	chr1	39371429	39371430	1-39837102
chr1	39370185	39372480	chr1_MACF1+:E067:upstream	chr1	39371671	39371672	1-39837344
chr1	39370185	39372480	chr1_MACF1+:E066:downstream	chr1	39371671	39371672	1-39837344
chr1	39370185	39372480	chr1_MACF1+:E067:upstream	chr1	39371954	39371955	1-39837627
chr1	39370185	39372480	chr1_MACF1+:E066:downstream	chr1	39371954	39371955	1-39837627
chr1	39372595	39378462	chr1_MACF1+:E067:downstream	chr1	39374631	39374632	1-39840304
chr1	39372595	39378462	chr1_MACF1+:E067:downstream	chr1	39375095	39375096	1-39840768
chr1	39372595	39378462	chr1_MACF1+:E067:downstream	chr1	39376770	39376771	1-39842443
chr1	39372595	39378462	chr1_MACF1+:E067:downstream	chr1	39377017	39377018	1-39842690
chr1	39372595	39378462	chr1_MACF1+:E067:downstream	chr1	39378285	39378286	1-39843958
chr1	39380372	39381954	chr1_MACF1+:E071:upstream	chr1	39380594	39380595	1-39846267
chr1	39380372	39381954	chr1_MACF1+:E070:downstream	chr1	39380594	39380595	1-39846267
chr1	39380372	39381954	chr1_MACF1+:E071:upstream	chr1	39380816	39380817	1-39846489
chr1	39380372	39381954	chr1_MACF1+:E070:downstream	chr1	39380816	39380817	1-39846489
chr1	39380372	39381954	chr1_MACF1+:E071:upstream	chr1	39380917	39380918	1-39846590
chr1	39380372	39381954	chr1_MACF1+:E070:downstream	chr1	39380917	39380918	1-39846590
chr1	39382151	39385435	chr1_MACF1+:E072:upstream	chr1	39382674	39382675	1-39848347
chr1	39382151	39385435	chr1_MACF1+:E071:downstream	chr1	39382674	39382675	1-39848347
chr1	39385928	39387188	chr1_MACF1+:E074:upstream	chr1	39386469	39386470	1-39852142
chr1	39385928	39387188	chr1_MACF1+:E073:downstream	chr1	39386469	39386470	1-39852142
chr1	39388657	39422375	chr1_MACF1+:E074:downstream	chr1	39389504	39389505	1-39855177
chr1	39388657	39422375	chr1_MACF1+:E074:downstream	chr1	39391519	39391520	1-39857192
chr1	39388657	39422375	chr1_MACF1+:E074:downstream	chr1	39393121	39393122	1-39858794
chr1	39388657	39422375	chr1_MACF1+:E074:downstream	chr1	39393274	39393275	1-39858947
chr1	39388657	39422375	chr1_MACF1+:E074:downstream	chr1	39394265	39394266	1-39859938
chr1	39388657	39422375	chr1_MACF1+:E074:downstream	chr1	39397542	39397543	1-39863215
chr1	39388657	39422375	chr1_MACF1+:E074:downstream	chr1	39401382	39401383	1-39867055
chr1	39388657	39422375	chr1_MACF1+:E074:downstream	chr1	39405120	39405121	1-39870793
chr1	39388657	39422375	chr1_MACF1+:E074:downstream	chr1	39408866	39408867	1-39874539
chr1	39388657	39422375	chr1_MACF1+:E074:downstream	chr1	39414646	39414647	1-39880319
chr1	39388657	39422375	chr1_MACF1+:E074:downstream	chr1	39415367	39415368	1-39881040
chr1	39388657	39422375	chr1_MACF1+:E074:downstream	chr1	39415795	39415796	1-39881468
chr1	39388657	39422375	chr1_MACF1+:E074:downstream	chr1	39418760	39418761	1-39884433
chr1	39388657	39422375	chr1_MACF1+:E074:downstream	chr1	39420090	39420091	1-39885763
chr1	39388657	39422375	chr1_MACF1+:E074:downstream	chr1	39421100	39421101	1-39886773
chr1	39422899	39424029	chr1_MACF1+:E077:upstream	chr1	39424004	39424005	1-39889677
chr1	39422899	39424029	chr1_MACF1+:E076:downstream	chr1	39424004	39424005	1-39889677
chr1	39424193	39427456	chr1_MACF1+:E078:upstream	chr1	39427101	39427102	1-39892774
chr1	39424193	39427456	chr1_MACF1+:E077:downstream	chr1	39427101	39427102	1-39892774
chr1	39424193	39427456	chr1_MACF1+:E078:upstream	chr1	39427420	39427421	1-39893093
chr1	39424193	39427456	chr1_MACF1+:E077:downstream	chr1	39427420	39427421	1-39893093
chr1	39429325	39429828	chr1_MACF1+:E081:upstream	chr1	39429787	39429788	1-39895460
chr1	39429325	39429828	chr1_MACF1+:E080:downstream	chr1	39429787	39429788	1-39895460
chr1	39436489	39437778	chr1_MACF1+:E088:upstream	chr1	39437456	39437457	1-39903129
chr1	39436489	39437778	chr1_MACF1+:E087:downstream	chr1	39437456	39437457	1-39903129
chr1	39438007	39439275	chr1_MACF1+:E089:upstream	chr1	39438939	39438940	1-39904612
chr1	39438007	39439275	chr1_MACF1+:E088:downstream	chr1	39438939	39438940	1-39904612
chr1	39439499	39441004	chr1_MACF1+:E090:upstream	chr1	39439915	39439916	1-39905588
chr1	39439499	39441004	chr1_MACF1+:E089:downstream	chr1	39439915	39439916	1-39905588
chr1	39439499	39441004	chr1_MACF1+:E090:upstream	chr1	39440200	39440201	1-39905873
chr1	39439499	39441004	chr1_MACF1+:E089:downstream	chr1	39440200	39440201	1-39905873
chr1	39442910	39443447	chr1_MACF1+:E096:upstream	chr1	39443053	39443054	1-39908726
chr1	39442910	39443447	chr1_MACF1+:E095:downstream	chr1	39443053	39443054	1-39908726
chr1	39443573	39444663	chr1_MACF1+:E097:upstream	chr1	39443882	39443883	1-39909555
chr1	39443573	39444663	chr1_MACF1+:E096:downstream	chr1	39443882	39443883	1-39909555
chr1	39444834	39447433	chr1_MACF1+:E098:upstream	chr1	39445328	39445329	1-39911001
chr1	39444834	39447433	chr1_MACF1+:E097:downstream	chr1	39445328	39445329	1-39911001
chr1	39447586	39447693	chr1_MACF1+:E099:upstream	chr1	39447678	39447679	1-39913351
chr1	39447586	39447693	chr1_MACF1+:E098:downstream	chr1	39447678	39447679	1-39913351
chr1	39448151	39448595	chr1_MACF1+:E101:upstream	chr1	39448417	39448418	1-39914090
chr1	39448151	39448595	chr1_MACF1+:E100:downstream	chr1	39448417	39448418	1-39914090
chr1	39448762	39451053	chr1_MACF1+:E102:upstream	chr1	39449536	39449537	1-39915209
chr1	39448762	39451053	chr1_MACF1+:E101:downstream	chr1	39449536	39449537	1-39915209
chr1	39455096	39458371	chr1_MACF1+:E107:upstream	chr1	39456138	39456139	1-39921811
chr1	39455096	39458371	chr1_MACF1+:E106:downstream	chr1	39456138	39456139	1-39921811
chr1	39455096	39458371	chr1_MACF1+:E107:upstream	chr1	39456753	39456754	1-39922426
chr1	39455096	39458371	chr1_MACF1+:E106:downstream	chr1	39456753	39456754	1-39922426
chr1	39455096	39458371	chr1_MACF1+:E107:upstream	chr1	39457211	39457212	1-39922884
chr1	39455096	39458371	chr1_MACF1+:E106:downstream	chr1	39457211	39457212	1-39922884
chr1	39455096	39458371	chr1_MACF1+:E107:upstream	chr1	39458059	39458060	1-39923732
chr1	39455096	39458371	chr1_MACF1+:E106:downstream	chr1	39458059	39458060	1-39923732
chr1	39458489	39459087	chr1_MACF1+:E108:upstream	chr1	39458725	39458726	1-39924398
chr1	39458489	39459087	chr1_MACF1+:E107:downstream	chr1	39458725	39458726	1-39924398
chr1	39462036	39463613	chr1_MACF1+:E111:upstream	chr1	39463311	39463312	1-39928984
chr1	39462036	39463613	chr1_MACF1+:E110:downstream	chr1	39463311	39463312	1-39928984
chr1	39462036	39463613	chr1_MACF1+:E111:upstream	chr1	39463567	39463568	1-39929240
chr1	39462036	39463613	chr1_MACF1+:E110:downstream	chr1	39463567	39463568	1-39929240
chr1	39468731	39469548	chr1_MACF1+:E113:downstream	chr1	39469103	39469104	1-39934776
chr1	39469614	39479799	chr1_MACF1+:E115:upstream	chr1	39472023	39472024	1-39937696
chr1	39469614	39479799	chr1_MACF1+:E115:upstream	chr1	39472584	39472585	1-39938257
chr1	39469614	39479799	chr1_MACF1+:E115:upstream	chr1	39474550	39474551	1-39940223
chr1	39469614	39479799	chr1_MACF1+:E115:upstream	chr1	39474826	39474827	1-39940499
chr1	39469614	39479799	chr1_MACF1+:E115:upstream	chr1	39476624	39476625	1-39942297
chr1	39469614	39479799	chr1_MACF1+:E115:upstream	chr1	39478507	39478508	1-39944180
chr1	39469614	39479799	chr1_MACF1+:E115:upstream	chr1	39478576	39478577	1-39944249
chr1	39469614	39479799	chr1_MACF1+:E115:upstream	chr1	39479095	39479096	1-39944768
chr1	39469614	39479799	chr1_MACF1+:E115:upstream	chr1	39479624	39479625	1-39945297
chr1	39481029	39484602	chr1_MACF1+:E117:upstream	chr1	39482551	39482552	1-39948224
chr1	39481029	39484602	chr1_MACF1+:E116:downstream	chr1	39482551	39482552	1-39948224
chr1	39481029	39484602	chr1_MACF1+:E117:upstream	chr1	39482666	39482667	1-39948339
chr1	39481029	39484602	chr1_MACF1+:E116:downstream	chr1	39482666	39482667	1-39948339
chr1	39481029	39484602	chr1_MACF1+:E117:upstream	chr1	39483068	39483069	1-39948741
chr1	39481029	39484602	chr1_MACF1+:E116:downstream	chr1	39483068	39483069	1-39948741
chr1	39481029	39484602	chr1_MACF1+:E117:upstream	chr1	39484407	39484408	1-39950080
chr1	39481029	39484602	chr1_MACF1+:E116:downstream	chr1	39484407	39484408	1-39950080
chr1	39565377	39567752	chr1_PABPC4-:E012:upstream	chr1	39566566	39566567	1-40032239
chr1	39567845	39568803	chr1_PABPC4-:E013:upstream	chr1	39568232	39568233	1-40033905
chr1	39567845	39568803	chr1_PABPC4-:E012:downstream	chr1	39568232	39568233	1-40033905
chr1	39572585	39575760	chr1_PABPC4-:E018:upstream	chr1	39572898	39572899	1-40038571
chr1	39572585	39575760	chr1_PABPC4-:E018:upstream	chr1	39572924	39572925	1-40038597
chr1	39572585	39575760	chr1_PABPC4-:E018:upstream	chr1	39573263	39573264	1-40038936
chr1	39572585	39575760	chr1_PABPC4-:E018:upstream	chr1	39574034	39574035	1-40039707
chr1	50970496	50973894	chr1_CDKN2C+:E004:upstream	chr1	50972692	50972693	1-51438365
chr1	50970496	50973894	chr1_CDKN2C+:E004:upstream	chr1	50973208	50973209	1-51438881
chr2	160313246	160318170	chr2_RBMS1-:E014:upstream	chr2	160313444	160313445	2-161169956
chr2	160313246	160318170	chr2_RBMS1-:E014:upstream	chr2	160313641	160313642	2-161170153
chr2	160313246	160318170	chr2_RBMS1-:E014:upstream	chr2	160314942	160314943	2-161171454
chr2	160313246	160318170	chr2_RBMS1-:E014:upstream	chr2	160315330	160315331	2-161171842
chr2	160318226	160367217	chr2_RBMS1-:E014:downstream	chr2	160319624	160319625	2-161176136
chr2	160318226	160367217	chr2_RBMS1-:E014:downstream	chr2	160319867	160319868	2-161176379
chr2	160318226	160367217	chr2_RBMS1-:E014:downstream	chr2	160322844	160322845	2-161179356
chr2	160318226	160367217	chr2_RBMS1-:E014:downstream	chr2	160322973	160322974	2-161179485
chr2	160318226	160367217	chr2_RBMS1-:E014:downstream	chr2	160324966	160324967	2-161181478
chr2	160318226	160367217	chr2_RBMS1-:E014:downstream	chr2	160327652	160327653	2-161184164
chr2	160318226	160367217	chr2_RBMS1-:E014:downstream	chr2	160335558	160335559	2-161192070
chr2	160318226	160367217	chr2_RBMS1-:E014:downstream	chr2	160336033	160336034	2-161192545
chr2	160318226	160367217	chr2_RBMS1-:E014:downstream	chr2	160337743	160337744	2-161194255
chr2	160318226	160367217	chr2_RBMS1-:E014:downstream	chr2	160342986	160342987	2-161199498
chr2	160318226	160367217	chr2_RBMS1-:E014:downstream	chr2	160343709	160343710	2-161200221
chr2	160318226	160367217	chr2_RBMS1-:E014:downstream	chr2	160343753	160343754	2-161200265
chr2	160318226	160367217	chr2_RBMS1-:E014:downstream	chr2	160346076	160346077	2-161202588
chr2	160318226	160367217	chr2_RBMS1-:E014:downstream	chr2	160352025	160352026	2-161208537
chr2	160318226	160367217	chr2_RBMS1-:E014:downstream	chr2	160353276	160353277	2-161209788
chr2	160318226	160367217	chr2_RBMS1-:E014:downstream	chr2	160354143	160354144	2-161210655
chr2	160318226	160367217	chr2_RBMS1-:E014:downstream	chr2	160357663	160357664	2-161214175
chr2	160318226	160367217	chr2_RBMS1-:E014:downstream	chr2	160360209	160360210	2-161216721
chr2	160318226	160367217	chr2_RBMS1-:E014:downstream	chr2	160362669	160362670	2-161219181
chr2	160318226	160367217	chr2_RBMS1-:E014:downstream	chr2	160363763	160363764	2-161220275
chr2	160367390	160407465	chr2_RBMS1-:E017:upstream	chr2	160367718	160367719	2-161224230
chr2	160367390	160407465	chr2_RBMS1-:E017:upstream	chr2	160368146	160368147	2-161224658
chr2	160367390	160407465	chr2_RBMS1-:E017:upstream	chr2	160368734	160368735	2-161225246
chr2	160367390	160407465	chr2_RBMS1-:E017:upstream	chr2	160375504	160375505	2-161232016
chr2	160367390	160407465	chr2_RBMS1-:E017:upstream	chr2	160385783	160385784	2-161242295
chr2	160367390	160407465	chr2_RBMS1-:E017:upstream	chr2	160387561	160387562	2-161244073
chr2	160367390	160407465	chr2_RBMS1-:E017:upstream	chr2	160393603	160393604	2-161250115
chr2	160367390	160407465	chr2_RBMS1-:E017:upstream	chr2	160396055	160396056	2-161252567
chr2	160367390	160407465	chr2_RBMS1-:E017:upstream	chr2	160397684	160397685	2-161254196
chr2	160367390	160407465	chr2_RBMS1-:E017:upstream	chr2	160402770	160402771	2-161259282
chr2	164800553	164841157	chr2_COBLL1-:E019:upstream	chr2	164805991	164805992	2-165662502
chr2	164800553	164841157	chr2_COBLL1-:E019:upstream	chr2	164811132	164811133	2-165667643
chr2	164800553	164841157	chr2_COBLL1-:E019:upstream	chr2	164818227	164818228	2-165674738
chr2	164800553	164841157	chr2_COBLL1-:E019:upstream	chr2	164819182	164819183	2-165675693
chr2	164800553	164841157	chr2_COBLL1-:E019:upstream	chr2	164829135	164829136	2-165685646
chr2	164800553	164841157	chr2_COBLL1-:E019:upstream	chr2	164830675	164830676	2-165687186
chr2	27387157	27409304	chr2_PPM1G-:E010:upstream	chr2	27388049	27388050	2-27610917
chr2	27387157	27409304	chr2_PPM1G-:E010:upstream	chr2	27388601	27388602	2-27611469
chr2	27387157	27409304	chr2_PPM1G-:E010:upstream	chr2	27390163	27390164	2-27613031
chr2	27387157	27409304	chr2_PPM1G-:E010:upstream	chr2	27391581	27391582	2-27614449
chr2	27387157	27409304	chr2_PPM1G-:E010:upstream	chr2	27392426	27392427	2-27615294
chr2	27387157	27409304	chr2_PPM1G-:E010:upstream	chr2	27392521	27392522	2-27615389
chr2	27387157	27409304	chr2_PPM1G-:E010:upstream	chr2	27393922	27393923	2-27616790
chr2	27387157	27409304	chr2_PPM1G-:E010:upstream	chr2	27396181	27396182	2-27619049
chr2	27387157	27409304	chr2_PPM1G-:E010:upstream	chr2	27397959	27397960	2-27620827
chr2	27387157	27409304	chr2_PPM1G-:E010:upstream	chr2	27402793	27402794	2-27625661
chr2	27387157	27409304	chr2_PPM1G-:E010:upstream	chr2	27403149	27403150	2-27626017
chr2	27387157	27409304	chr2_PPM1G-:E010:upstream	chr2	27404077	27404078	2-27626945
chr2	27387157	27409304	chr2_PPM1G-:E010:upstream	chr2	27404498	27404499	2-27627366
chr2	27387157	27409304	chr2_PPM1G-:E010:upstream	chr2	27408323	27408324	2-27631191
chr2	65088689	65088940	chr2_RAB1A-:E001:downstream	chr2	65088768	65088769	2-65315903
chr2	65098065	65104735	chr2_RAB1A-:E005:upstream	chr2	65100485	65100486	2-65327620
chr2	65104805	65129894	chr2_RAB1A-:E006:upstream	chr2	65108898	65108899	2-65336033
chr2	65104805	65129894	chr2_RAB1A-:E005:downstream	chr2	65108898	65108899	2-65336033
chr2	65104805	65129894	chr2_RAB1A-:E006:upstream	chr2	65111287	65111288	2-65338422
chr2	65104805	65129894	chr2_RAB1A-:E005:downstream	chr2	65111287	65111288	2-65338422
chr2	65104805	65129894	chr2_RAB1A-:E006:upstream	chr2	65118596	65118597	2-65345731
chr2	65104805	65129894	chr2_RAB1A-:E005:downstream	chr2	65118596	65118597	2-65345731
chr2	65104805	65129894	chr2_RAB1A-:E006:upstream	chr2	65128609	65128610	2-65355744
chr2	65104805	65129894	chr2_RAB1A-:E005:downstream	chr2	65128609	65128610	2-65355744
chr3	63839772	63863505	chr3_THOC7-:E007:downstream	chr3	63855718	63855719	3-63841395
chr3	63839772	63863505	chr3_THOC7-:E007:downstream	chr3	63856265	63856266	3-63841942
chr4	152411871	152412481	chr4_FBXW7-:E016:downstream	chr4	152411947	152411948	4-153333100
chr4	17795051	17799779	chr4_DCAF16-:E002:upstream	chr4	17796710	17796711	4-17798334
chr4	6261638	6269851	chr4_WFS1+:E003:upstream	chr4	6262268	6262269	4-6263996
chr4	6261638	6269851	chr4_WFS1+:E003:upstream	chr4	6262511	6262512	4-6264239
chr4	6261638	6269851	chr4_WFS1+:E003:upstream	chr4	6262666	6262667	4-6264394
chr4	6261638	6269851	chr4_WFS1+:E003:upstream	chr4	6262857	6262858	4-6264585
chr4	6261638	6269851	chr4_WFS1+:E003:upstream	chr4	6263037	6263038	4-6264765
chr4	6261638	6269851	chr4_WFS1+:E003:upstream	chr4	6263240	6263241	4-6264968
chr4	6261638	6269851	chr4_WFS1+:E003:upstream	chr4	6263469	6263470	4-6265197
chr4	6261638	6269851	chr4_WFS1+:E003:upstream	chr4	6263523	6263524	4-6265251
chr4	6261638	6269851	chr4_WFS1+:E003:upstream	chr4	6265273	6265274	4-6267001
chr4	6261638	6269851	chr4_WFS1+:E003:upstream	chr4	6265359	6265360	4-6267087
chr4	6261638	6269851	chr4_WFS1+:E003:upstream	chr4	6268328	6268329	4-6270056
chr4	6261638	6269851	chr4_WFS1+:E003:upstream	chr4	6269315	6269316	4-6271043
chr4	6261638	6269851	chr4_WFS1+:E003:upstream	chr4	6269343	6269344	4-6271071
chr4	6261638	6269851	chr4_WFS1+:E003:upstream	chr4	6269422	6269423	4-6271150
chr4	6261638	6269851	chr4_WFS1+:E003:upstream	chr4	6269688	6269689	4-6271416
chr4	6270013	6277452	chr4_WFS1+:E003:downstream	chr4	6270098	6270099	4-6271826
chr4	6270013	6277452	chr4_WFS1+:E003:downstream	chr4	6270578	6270579	4-6272306
chr4	6270013	6277452	chr4_WFS1+:E003:downstream	chr4	6270990	6270991	4-6272718
chr4	6270013	6277452	chr4_WFS1+:E003:downstream	chr4	6271160	6271161	4-6272888
chr4	6270013	6277452	chr4_WFS1+:E003:downstream	chr4	6272074	6272075	4-6273802
chr4	6270013	6277452	chr4_WFS1+:E003:downstream	chr4	6274007	6274008	4-6275735
chr4	6270013	6277452	chr4_WFS1+:E003:downstream	chr4	6274398	6274399	4-6276126
chr4	6270013	6277452	chr4_WFS1+:E003:downstream	chr4	6274853	6274854	4-6276581
chr4	6270013	6277452	chr4_WFS1+:E003:downstream	chr4	6274902	6274903	4-6276630
chr4	6270013	6277452	chr4_WFS1+:E003:downstream	chr4	6275077	6275078	4-6276805
chr4	6270013	6277452	chr4_WFS1+:E003:downstream	chr4	6275321	6275322	4-6277049
chr4	6270013	6277452	chr4_WFS1+:E003:downstream	chr4	6275869	6275870	4-6277597
chr4	6270013	6277452	chr4_WFS1+:E003:downstream	chr4	6276491	6276492	4-6278219
chr4	6270013	6277452	chr4_WFS1+:E003:downstream	chr4	6276523	6276524	4-6278251
chr4	6270013	6277452	chr4_WFS1+:E003:downstream	chr4	6276919	6276920	4-6278647
chr4	6270013	6277452	chr4_WFS1+:E003:downstream	chr4	6277319	6277320	4-6279047
chr4	705969	730631	chr4_PCGF3+:E002:upstream	chr4	709053	709054	4-702843
chr4	705969	730631	chr4_PCGF3+:E001:downstream	chr4	709053	709054	4-702843
chr4	705969	730631	chr4_PCGF3+:E002:upstream	chr4	712244	712245	4-706034
chr4	705969	730631	chr4_PCGF3+:E001:downstream	chr4	712244	712245	4-706034
chr4	705969	730631	chr4_PCGF3+:E002:upstream	chr4	712600	712601	4-706390
chr4	705969	730631	chr4_PCGF3+:E001:downstream	chr4	712600	712601	4-706390
chr4	705969	730631	chr4_PCGF3+:E002:upstream	chr4	713810	713811	4-707600
chr4	705969	730631	chr4_PCGF3+:E001:downstream	chr4	713810	713811	4-707600
chr4	705969	730631	chr4_PCGF3+:E002:upstream	chr4	725078	725079	4-718868
chr4	705969	730631	chr4_PCGF3+:E001:downstream	chr4	725078	725079	4-718868
chr4	705969	730631	chr4_PCGF3+:E002:upstream	chr4	726516	726517	4-720306
chr4	705969	730631	chr4_PCGF3+:E001:downstream	chr4	726516	726517	4-720306
chr4	705969	730631	chr4_PCGF3+:E002:upstream	chr4	726891	726892	4-720681
chr4	705969	730631	chr4_PCGF3+:E001:downstream	chr4	726891	726892	4-720681
chr4	705969	730631	chr4_PCGF3+:E002:upstream	chr4	727550	727551	4-721340
chr4	705969	730631	chr4_PCGF3+:E001:downstream	chr4	727550	727551	4-721340
chr4	705969	730631	chr4_PCGF3+:E002:upstream	chr4	728516	728517	4-722306
chr4	705969	730631	chr4_PCGF3+:E001:downstream	chr4	728516	728517	4-722306
chr6	31269172	31269339	chr6_HLA-C-:E001:downstream	chr6	31269220	31269221	6-31236998
chr6	31270484	31271074	chr6_HLA-C-:E005:downstream	chr6	31270599	31270600	6-31238377
chr7	157139337	157139757	chr7_UBE3C+:E002:downstream	chr7	157139591	157139592	7-156932286
chr8	144291873	144308907	chr8_HSF1+:E003:downstream	chr8	144301593	144301594	8-145525277
chr8	94945598	94949155	chr8_TP53INP1-:E006:upstream	chr8	94946408	94946409	8-95958637
chr8	94945598	94949155	chr8_TP53INP1-:E006:upstream	chr8	94947579	94947580	8-95959808
chr8	94945598	94949155	chr8_TP53INP1-:E006:upstream	chr8	94948282	94948283	8-95960511
chr8	94945598	94949155	chr8_TP53INP1-:E006:upstream	chr8	94948538	94948539	8-95960767
chr8	94945598	94949155	chr8_TP53INP1-:E006:upstream	chr8	94948626	94948627	8-95960855
chr8	94945598	94949155	chr8_TP53INP1-:E006:upstream	chr8	94948657	94948658	8-95960886
chr8	94945598	94949155	chr8_TP53INP1-:E006:upstream	chr8	94948718	94948719	8-95960947
chr8	96494330	96529194	chr8_SDC2+:E002:downstream	chr8	96526350	96526351	8-97538579
chr10	122397973	122400344	chr10_PLEKHA1+:E025:upstream	chr10	122398304	122398305	10-124157821
chr10	122397973	122400344	chr10_PLEKHA1+:E025:upstream	chr10	122398341	122398342	10-124157858
chr10	122400387	122406577	chr10_PLEKHA1+:E025:downstream	chr10	122406098	122406099	10-124165615
chr10	91924089	91935658	chr10_BTAF1+:E005:downstream	chr10	91925676	91925677	10-93685434
chr10	91924089	91935658	chr10_BTAF1+:E005:downstream	chr10	91928292	91928293	10-93688050
chr10	91924089	91935658	chr10_BTAF1+:E005:downstream	chr10	91929745	91929746	10-93689503
chr10	91924089	91935658	chr10_BTAF1+:E005:downstream	chr10	91931698	91931699	10-93691456
chr10	91924089	91935658	chr10_BTAF1+:E005:downstream	chr10	91932082	91932083	10-93691840
chr10	91924089	91935658	chr10_BTAF1+:E005:downstream	chr10	91933261	91933262	10-93693019
chr10	91924089	91935658	chr10_BTAF1+:E005:downstream	chr10	91933445	91933446	10-93693203
chr10	91924089	91935658	chr10_BTAF1+:E005:downstream	chr10	91933547	91933548	10-93693305
chr10	91924089	91935658	chr10_BTAF1+:E005:downstream	chr10	91935135	91935136	10-93694893
chr10	91924089	91935658	chr10_BTAF1+:E005:downstream	chr10	91935139	91935140	10-93694897
chr10	91924089	91935658	chr10_BTAF1+:E005:downstream	chr10	91935552	91935553	10-93695310
chr11	17155628	17168678	chr11_PIK3C2A-:E034:upstream	chr11	17166968	17166969	11-17188516
chr11	17169805	17194390	chr11_PIK3C2A-:E034:downstream	chr11	17171927	17171928	11-17193475
chr11	17169805	17194390	chr11_PIK3C2A-:E034:downstream	chr11	17173036	17173037	11-17194584
chr11	17169805	17194390	chr11_PIK3C2A-:E034:downstream	chr11	17173963	17173964	11-17195511
chr11	17169805	17194390	chr11_PIK3C2A-:E034:downstream	chr11	17178672	17178673	11-17200220
chr11	17169805	17194390	chr11_PIK3C2A-:E034:downstream	chr11	17179343	17179344	11-17200891
chr11	17169805	17194390	chr11_PIK3C2A-:E034:downstream	chr11	17182900	17182901	11-17204448
chr11	17169805	17194390	chr11_PIK3C2A-:E034:downstream	chr11	17184971	17184972	11-17206519
chr11	17169805	17194390	chr11_PIK3C2A-:E034:downstream	chr11	17185192	17185193	11-17206740
chr11	17169805	17194390	chr11_PIK3C2A-:E034:downstream	chr11	17185197	17185198	11-17206745
chr11	17169805	17194390	chr11_PIK3C2A-:E034:downstream	chr11	17187166	17187167	11-17208714
chr11	17169805	17194390	chr11_PIK3C2A-:E034:downstream	chr11	17188414	17188415	11-17209962
chr11	17169805	17194390	chr11_PIK3C2A-:E034:downstream	chr11	17188933	17188934	11-17210481
chr11	17169805	17194390	chr11_PIK3C2A-:E034:downstream	chr11	17190827	17190828	11-17212375
chr11	65444456	65444559	chr11_NEAT1+:E002:downstream	chr11	65444507	65444508	11-65211979
chr11	65539880	65540014	chr11_LTBP3-:E005:upstream	chr11	65539930	65539931	11-65307402
chr11	65539880	65540014	chr11_LTBP3-:E004:downstream	chr11	65539930	65539931	11-65307402
chr11	72781293	72792876	chr11_STARD10-:E007:upstream	chr11	72786416	72786417	11-72497462
chr11	72781293	72792876	chr11_STARD10-:E007:upstream	chr11	72787989	72787990	11-72499035
chr11	72781293	72792876	chr11_STARD10-:E007:upstream	chr11	72789956	72789957	11-72501002
chr12	120866555	120903846	chr12_SPPL3-:E013:upstream	chr12	120868036	120868037	12-121305840
chr12	120866555	120903846	chr12_SPPL3-:E013:upstream	chr12	120871638	120871639	12-121309442
chr12	123261802	123265197	chr12_CDK2AP1-:E002:downstream	chr12	123261809	123261810	12-123746357
chr12	123261802	123265197	chr12_CDK2AP1-:E002:downstream	chr12	123261962	123261963	12-123746510
chr12	27781201	27788040	chr12_KLHL42+:E002:downstream	chr12	27784537	27784538	12-27937471
chr12	27781201	27788040	chr12_KLHL42+:E002:downstream	chr12	27784573	27784574	12-27937507
chr12	27781201	27788040	chr12_KLHL42+:E002:downstream	chr12	27785141	27785142	12-27938075
chr12	27781201	27788040	chr12_KLHL42+:E002:downstream	chr12	27785637	27785638	12-27938571
chr12	27781201	27788040	chr12_KLHL42+:E002:downstream	chr12	27787013	27787014	12-27939947
chr12	27781201	27788040	chr12_KLHL42+:E002:downstream	chr12	27787589	27787590	12-27940523
chr13	30461687	30462539	chr13_HMGB1-:E006:upstream	chr13	30462504	30462505	13-31036642
chr14	78988140	79279340	chr14_NRXN3+:E025:upstream	chr14	79214959	79214960	14-79681303
chr14	78988140	79279340	chr14_NRXN3+:E025:upstream	chr14	79236904	79236905	14-79703248
chr14	78988140	79279340	chr14_NRXN3+:E025:upstream	chr14	79245908	79245909	14-79712252
chr14	78988140	79279340	chr14_NRXN3+:E025:upstream	chr14	79256206	79256207	14-79722550
chr14	79280537	79467222	chr14_NRXN3+:E025:downstream	chr14	79283357	79283358	14-79749701
chr14	79280537	79467222	chr14_NRXN3+:E025:downstream	chr14	79367150	79367151	14-79833494
chr14	79280537	79467222	chr14_NRXN3+:E025:downstream	chr14	79384804	79384805	14-79851148
chr14	79280537	79467222	chr14_NRXN3+:E025:downstream	chr14	79388488	79388489	14-79854832
chr14	79280537	79467222	chr14_NRXN3+:E025:downstream	chr14	79388541	79388542	14-79854885
chr14	79280537	79467222	chr14_NRXN3+:E025:downstream	chr14	79390042	79390043	14-79856386
chr14	79280537	79467222	chr14_NRXN3+:E025:downstream	chr14	79392300	79392301	14-79858644
chr14	79280537	79467222	chr14_NRXN3+:E025:downstream	chr14	79392310	79392311	14-79858654
chr14	79280537	79467222	chr14_NRXN3+:E025:downstream	chr14	79392693	79392694	14-79859037
chr14	79280537	79467222	chr14_NRXN3+:E025:downstream	chr14	79392894	79392895	14-79859238
chr14	79280537	79467222	chr14_NRXN3+:E025:downstream	chr14	79398904	79398905	14-79865248
chr14	79280537	79467222	chr14_NRXN3+:E025:downstream	chr14	79400307	79400308	14-79866651
chr14	79280537	79467222	chr14_NRXN3+:E025:downstream	chr14	79401840	79401841	14-79868184
chr14	79280537	79467222	chr14_NRXN3+:E025:downstream	chr14	79402264	79402265	14-79868608
chr14	79280537	79467222	chr14_NRXN3+:E025:downstream	chr14	79404466	79404467	14-79870810
chr14	79280537	79467222	chr14_NRXN3+:E025:downstream	chr14	79404954	79404955	14-79871298
chr14	79280537	79467222	chr14_NRXN3+:E025:downstream	chr14	79406560	79406561	14-79872904
chr14	79280537	79467222	chr14_NRXN3+:E025:downstream	chr14	79408856	79408857	14-79875200
chr14	79280537	79467222	chr14_NRXN3+:E025:downstream	chr14	79408956	79408957	14-79875300
chr14	79280537	79467222	chr14_NRXN3+:E025:downstream	chr14	79417581	79417582	14-79883925
chr14	79280537	79467222	chr14_NRXN3+:E025:downstream	chr14	79420483	79420484	14-79886827
chr14	79280537	79467222	chr14_NRXN3+:E025:downstream	chr14	79424112	79424113	14-79890456
chr14	79280537	79467222	chr14_NRXN3+:E025:downstream	chr14	79424333	79424334	14-79890677
chr14	79280537	79467222	chr14_NRXN3+:E025:downstream	chr14	79425538	79425539	14-79891882
chr14	79280537	79467222	chr14_NRXN3+:E025:downstream	chr14	79427702	79427703	14-79894046
chr14	79280537	79467222	chr14_NRXN3+:E025:downstream	chr14	79443775	79443776	14-79910119
chr14	79280537	79467222	chr14_NRXN3+:E025:downstream	chr14	79464300	79464301	14-79930644
chr14	79280537	79467222	chr14_NRXN3+:E025:downstream	chr14	79465697	79465698	14-79932041
chr14	79280537	79467222	chr14_NRXN3+:E025:downstream	chr14	79466479	79466480	14-79932823
chr14	91490801	91509507	chr14_PPP4R3A-:E021:upstream	chr14	91491040	91491041	14-91957385
chr14	91490801	91509507	chr14_PPP4R3A-:E021:upstream	chr14	91493878	91493879	14-91960223
chr14	91490801	91509507	chr14_PPP4R3A-:E021:upstream	chr14	91494439	91494440	14-91960784
chr14	91490801	91509507	chr14_PPP4R3A-:E021:upstream	chr14	91494527	91494528	14-91960872
chr14	91490801	91509507	chr14_PPP4R3A-:E021:upstream	chr14	91494843	91494844	14-91961188
chr14	91490801	91509507	chr14_PPP4R3A-:E021:upstream	chr14	91496181	91496182	14-91962526
chr14	91490801	91509507	chr14_PPP4R3A-:E021:upstream	chr14	91497377	91497378	14-91963722
chr14	91490801	91509507	chr14_PPP4R3A-:E021:upstream	chr14	91498529	91498530	14-91964874
chr14	91490801	91509507	chr14_PPP4R3A-:E021:upstream	chr14	91500286	91500287	14-91966631
chr14	91490801	91509507	chr14_PPP4R3A-:E021:upstream	chr14	91501321	91501322	14-91967666
chr14	91490801	91509507	chr14_PPP4R3A-:E021:upstream	chr14	91501782	91501783	14-91968127
chr14	91490801	91509507	chr14_PPP4R3A-:E021:upstream	chr14	91501968	91501969	14-91968313
chr14	91490801	91509507	chr14_PPP4R3A-:E021:upstream	chr14	91504920	91504921	14-91971265
chr14	91490801	91509507	chr14_PPP4R3A-:E021:upstream	chr14	91505238	91505239	14-91971583
chr14	91490801	91509507	chr14_PPP4R3A-:E021:upstream	chr14	91506407	91506408	14-91972752
chr15	41669957	41696076	chr15_MGA+:E014:upstream	chr15	41673343	41673344	15-41965542
chr15	41669957	41696076	chr15_MGA+:E014:upstream	chr15	41676027	41676028	15-41968226
chr15	41669957	41696076	chr15_MGA+:E014:upstream	chr15	41694212	41694213	15-41986411
chr15	63537155	63542056	chr15_USP3+:E011:upstream	chr15	63539669	63539670	15-63831869
chr15	63537155	63542056	chr15_USP3+:E011:upstream	chr15	63540132	63540133	15-63832332
chr15	63537155	63542056	chr15_USP3+:E011:upstream	chr15	63540362	63540363	15-63832562
chr15	63542191	63553716	chr15_USP3+:E011:downstream	chr15	63545733	63545734	15-63837933
chr15	63542191	63553716	chr15_USP3+:E011:downstream	chr15	63546570	63546571	15-63838770
chr15	63542191	63553716	chr15_USP3+:E011:downstream	chr15	63547297	63547298	15-63839497
chr15	63542191	63553716	chr15_USP3+:E011:downstream	chr15	63551263	63551264	15-63843463
chr15	75527260	75578715	chr15_PTPN9-:E013:upstream	chr15	75529888	75529889	15-75822230
chr15	75527260	75578715	chr15_PTPN9-:E013:upstream	chr15	75532995	75532996	15-75825337
chr15	75527260	75578715	chr15_PTPN9-:E013:upstream	chr15	75533480	75533481	15-75825822
chr15	75527260	75578715	chr15_PTPN9-:E013:upstream	chr15	75538197	75538198	15-75830539
chr15	75527260	75578715	chr15_PTPN9-:E013:upstream	chr15	75539107	75539108	15-75831449
chr15	75527260	75578715	chr15_PTPN9-:E013:upstream	chr15	75541444	75541445	15-75833786
chr15	75527260	75578715	chr15_PTPN9-:E013:upstream	chr15	75547610	75547611	15-75839952
chr15	75527260	75578715	chr15_PTPN9-:E013:upstream	chr15	75552755	75552756	15-75845097
chr15	75527260	75578715	chr15_PTPN9-:E013:upstream	chr15	75556667	75556668	15-75849009
chr15	75527260	75578715	chr15_PTPN9-:E013:upstream	chr15	75557372	75557373	15-75849714
chr15	75527260	75578715	chr15_PTPN9-:E013:upstream	chr15	75557434	75557435	15-75849776
chr15	75527260	75578715	chr15_PTPN9-:E013:upstream	chr15	75563680	75563681	15-75856022
chr15	75527260	75578715	chr15_PTPN9-:E013:upstream	chr15	75568734	75568735	15-75861076
chr15	75527260	75578715	chr15_PTPN9-:E013:upstream	chr15	75570551	75570552	15-75862893
chr15	75527260	75578715	chr15_PTPN9-:E013:upstream	chr15	75571993	75571994	15-75864335
chr15	75527260	75578715	chr15_PTPN9-:E013:upstream	chr15	75573808	75573809	15-75866150
chr17	17812850	17813369	chr17_SREBF1-:E006:upstream	chr17	17813216	17813217	17-17716531
chr17	17812850	17813369	chr17_SREBF1-:E005:downstream	chr17	17813216	17813217	17-17716531
chr17	17820520	17823519	chr17_SREBF1-:E028:upstream	chr17	17821474	17821475	17-17724789
chr17	17820520	17823519	chr17_SREBF1-:E028:upstream	chr17	17823154	17823155	17-17726469
chr17	17823663	17836728	chr17_SREBF1-:E030:upstream	chr17	17824628	17824629	17-17727943
chr17	17823663	17836728	chr17_SREBF1-:E030:upstream	chr17	17824728	17824729	17-17728043
chr17	17823663	17836728	chr17_SREBF1-:E030:upstream	chr17	17825259	17825260	17-17728574
chr17	17823663	17836728	chr17_SREBF1-:E030:upstream	chr17	17825668	17825669	17-17728983
chr17	17823663	17836728	chr17_SREBF1-:E030:upstream	chr17	17827885	17827886	17-17731200
chr17	17823663	17836728	chr17_SREBF1-:E030:upstream	chr17	17828336	17828337	17-17731651
chr17	17823663	17836728	chr17_SREBF1-:E030:upstream	chr17	17829004	17829005	17-17732319
chr17	17823663	17836728	chr17_SREBF1-:E030:upstream	chr17	17830445	17830446	17-17733760
chr17	17823663	17836728	chr17_SREBF1-:E030:upstream	chr17	17830511	17830512	17-17733826
chr17	17823663	17836728	chr17_SREBF1-:E030:upstream	chr17	17830619	17830620	17-17733934
chr17	17823663	17836728	chr17_SREBF1-:E030:upstream	chr17	17831425	17831426	17-17734740
chr17	17823663	17836728	chr17_SREBF1-:E030:upstream	chr17	17832937	17832938	17-17736252
chr17	17823663	17836728	chr17_SREBF1-:E030:upstream	chr17	17833943	17833944	17-17737258
chr17	4067241	4070685	chr17_ZZEF1-:E035:downstream	chr17	4067942	4067943	17-3971237
chr17	4067241	4070685	chr17_ZZEF1-:E035:downstream	chr17	4069489	4069490	17-3972784
chr17	42412249	42422628	chr17_CAVIN1-:E003:upstream	chr17	42414221	42414222	17-40566240
chr17	42412249	42422628	chr17_CAVIN1-:E003:upstream	chr17	42414731	42414732	17-40566750
chr17	42412249	42422628	chr17_CAVIN1-:E003:upstream	chr17	42418402	42418403	17-40570421
chr17	42412249	42422628	chr17_CAVIN1-:E003:upstream	chr17	42419265	42419266	17-40571284
chr17	42516948	42521028	chr17_ATP6V0A1+:E036:upstream	chr17	42517304	42517305	17-40669323
chr17	42516948	42521028	chr17_ATP6V0A1+:E036:upstream	chr17	42520720	42520721	17-40672739
chr17	48908819	48910809	chr17_UBE2Z+:E001:downstream	chr17	48909253	48909254	17-46986616
chr17	48908819	48910809	chr17_UBE2Z+:E001:downstream	chr17	48909316	48909317	17-46986679
chr17	48908819	48910809	chr17_UBE2Z+:E001:downstream	chr17	48910302	48910303	17-46987665
chr17	48908819	48910809	chr17_UBE2Z+:E001:downstream	chr17	48910681	48910682	17-46988044
chr19	12940886	12943538	chr19_CALR+:E008:upstream	chr19	12942219	12942220	19-13053034
chr19	12940886	12943538	chr19_CALR+:E008:upstream	chr19	12942310	12942311	19-13053125
chr19	33391478	33401722	chr19_PEPD-:E004:downstream	chr19	33399931	33399932	19-33890838
chr22	31944819	31956140	chr22_YWHAH+:E002:upstream	chr22	31948415	31948416	22-32344403
chr22	31944819	31956140	chr22_YWHAH+:E001:downstream	chr22	31948415	31948416	22-32344403
chr22	31944819	31956140	chr22_YWHAH+:E002:upstream	chr22	31952853	31952854	22-32348841
chr22	31944819	31956140	chr22_YWHAH+:E001:downstream	chr22	31952853	31952854	22-32348841

## Sheet: BMI lean day 3 vs day 15
exon_chr	exon_start	exon_end	exon_name	snp_chr	snp_start	snp_end	snp_name
chr5	75338302	75342584	chr5_HMGCR+:E006:upstream	chr5	75340658	75340659	rs10045497
chr2	55010333	55025087	chr2_RTN4-:E008:upstream	chr2	55011619	55011620	rs10189094
chr2	55010333	55025087	chr2_RTN4-:E007:downstream	chr2	55011619	55011620	rs10189094
chr6	56900620	56953759	chr6_DST-:E122:downstream	chr6	56945740	56945741	rs1020548
chr2	54987697	55010088	chr2_RTN4-:E007:upstream	chr2	54991654	54991655	rs10496036
chr4	25415539	25416426	chr4_ANAPC4+:E036:downstream	chr4	25415748	25415749	rs10517073
chr11	13277922	13309988	chr11_ARNTL+:E006:downstream	chr11	13296416	13296417	rs10766073
chr11	13277922	13309988	chr11_ARNTL+:E006:downstream	chr11	13297018	13297019	rs10766074
chr11	13277922	13309988	chr11_ARNTL+:E006:downstream	chr11	13297039	13297040	rs10766075
chr11	13277922	13309988	chr11_ARNTL+:E006:downstream	chr11	13299795	13299796	rs10832020
chr11	13277922	13309988	chr11_ARNTL+:E006:downstream	chr11	13302982	13302983	rs10832021
chr11	13277922	13309988	chr11_ARNTL+:E006:downstream	chr11	13286046	13286047	rs11022750
chr11	13277922	13309988	chr11_ARNTL+:E006:downstream	chr11	13289306	13289307	rs11022753
chr11	13277922	13309988	chr11_ARNTL+:E006:downstream	chr11	13291695	13291696	rs11022754
chr11	13277922	13309988	chr11_ARNTL+:E006:downstream	chr11	13293501	13293502	rs11022755
chr11	13277922	13309988	chr11_ARNTL+:E006:downstream	chr11	13293891	13293892	rs11022756
chr15	59163302	59171898	chr15_MYO1E-:E008:upstream	chr15	59169045	59169046	rs11071411
chr17	29167020	29176573	chr17_MYO18A-:E045:downstream	chr17	29175010	29175011	rs11080090
chr3	12312452	12349470	chr3_PPARG+:E008:downstream	chr3	12344328	12344329	rs11128603
chr3	41227351	41233342	chr3_CTNNB1+:E018:downstream	chr3	41232580	41232581	rs11564450
chr3	41227351	41233342	chr3_CTNNB1+:E018:downstream	chr3	41232778	41232779	rs11564452
chr3	41227351	41233342	chr3_CTNNB1+:E018:downstream	chr3	41232985	41232986	rs11564454
chr11	13277922	13309988	chr11_ARNTL+:E006:downstream	chr11	13296976	13296977	rs11605776
chr17	63685589	63688528	chr17_MAP3K3+:E011:downstream	chr17	63685670	63685671	rs11658329
chr8	117837200	118110086	chr8_EXT1-:E010:downstream	chr8	117850821	117850822	rs11781699
chr3	62078257	62132603	chr3_PTPRG+:E009:downstream	chr3	62120804	62120805	rs11917047
chr8	117837200	118110086	chr8_EXT1-:E010:downstream	chr8	117877904	117877905	rs11993275
chr11	13277922	13309988	chr11_ARNTL+:E006:downstream	chr11	13292759	13292760	rs12290622
chr15	59172041	59173747	chr15_MYO1E-:E008:downstream	chr15	59173203	59173204	rs12440243
chr2	55010333	55025087	chr2_RTN4-:E008:upstream	chr2	55020120	55020121	rs12475787
chr2	55010333	55025087	chr2_RTN4-:E007:downstream	chr2	55020120	55020121	rs12475787
chr8	117837200	118110086	chr8_EXT1-:E010:downstream	chr8	117882773	117882774	rs12541851
chr8	117837200	118110086	chr8_EXT1-:E010:downstream	chr8	117874189	117874190	rs12542013
chr8	117837200	118110086	chr8_EXT1-:E010:downstream	chr8	117885423	117885424	rs12543508
chr8	117837200	118110086	chr8_EXT1-:E010:downstream	chr8	117891387	117891388	rs12544064
chr8	86488638	86506996	chr8_RMDN1-:E016:downstream	chr8	86493738	86493739	rs12546331
chr8	117837200	118110086	chr8_EXT1-:E010:downstream	chr8	117873402	117873403	rs12548703
chr8	117837200	118110086	chr8_EXT1-:E010:downstream	chr8	117869668	117869669	rs12549000
chr8	117837200	118110086	chr8_EXT1-:E010:downstream	chr8	117887129	117887130	rs12549700
chr2	160407897	160493290	chr2_RBMS1-:E019:upstream	chr2	160409398	160409399	rs12692596
chr3	158110222	158122104	chr3_RSRC1+:E005:downstream	chr3	158115184	158115185	rs12696067
chr3	12312452	12349470	chr3_PPARG+:E008:downstream	chr3	12327901	12327902	rs13064760
chr3	12312452	12349470	chr3_PPARG+:E008:downstream	chr3	12323808	12323809	rs13083375
chr5	123386666	123388305	chr5_CEP120-:E012:downstream	chr5	123387569	123387570	rs13154717
chr11	13277922	13309988	chr11_ARNTL+:E006:downstream	chr11	13289170	13289171	rs1481891
chr11	13277922	13309988	chr11_ARNTL+:E006:downstream	chr11	13280373	13280374	rs1481892
chr3	158110222	158122104	chr3_RSRC1+:E005:downstream	chr3	158121749	158121750	rs1581408
chr3	158110222	158122104	chr3_RSRC1+:E005:downstream	chr3	158115843	158115844	rs1608100
chr3	12312452	12349470	chr3_PPARG+:E008:downstream	chr3	12347813	12347814	rs17036326
chr3	12312452	12349470	chr3_PPARG+:E008:downstream	chr3	12348984	12348985	rs17036328
chr2	54987697	55010088	chr2_RTN4-:E007:upstream	chr2	54993447	54993448	rs17046570
chr2	55010333	55025087	chr2_RTN4-:E008:upstream	chr2	55017401	55017402	rs17046594
chr2	55010333	55025087	chr2_RTN4-:E007:downstream	chr2	55017401	55017402	rs17046594
chr5	158840109	158941695	chr5_EBF1-:E021:downstream	chr5	158844671	158844672	rs17056301
chr8	117837200	118110086	chr8_EXT1-:E010:downstream	chr8	117894340	117894341	rs17430533
chr8	117837200	118110086	chr8_EXT1-:E010:downstream	chr8	117883472	117883473	rs17450772
chr8	117837200	118110086	chr8_EXT1-:E010:downstream	chr8	117889106	117889107	rs17450793
chr13	32694303	32696855	chr13_PDS5B+:E018:downstream	chr13	32694913	32694914	rs17516171
chr3	41227351	41233342	chr3_CTNNB1+:E018:downstream	chr3	41230589	41230590	rs1880481
chr3	12351673	12379705	chr3_PPARG+:E011:downstream	chr3	12353340	12353341	rs1899951
chr3	62078257	62132603	chr3_PTPRG+:E009:downstream	chr3	62115165	62115166	rs1911746
chr4	25415539	25416426	chr4_ANAPC4+:E036:downstream	chr4	25416028	25416029	rs2168972
chr4	38689070	38689730	chr4_KLF3+:E007:downstream	chr4	38689402	38689403	rs2242189
chr15	59163302	59171898	chr15_MYO1E-:E008:upstream	chr15	59163780	59163781	rs2242323
chr17	7889099	7889665	chr17_CHD3+:E011:upstream	chr17	7889146	7889147	rs2279620
chr6	131618518	131619828	chr6_MED23-:E031:upstream	chr6	131619749	131619750	rs2297638
chr11	13277922	13309988	chr11_ARNTL+:E006:downstream	chr11	13281274	13281275	rs2403662
chr10	91248723	91251293	chr10_PCGF5+:E015:upstream	chr10	91250625	91250626	rs2450444
chr6	56900620	56953759	chr6_DST-:E122:downstream	chr6	56946325	56946326	rs2817573
chr3	12351673	12379705	chr3_PPARG+:E011:downstream	chr3	12355455	12355456	rs2881654
chr16	69937651	69939028	chr16_WWP2+:E034:downstream	chr16	69938061	69938062	rs3762177
chr1	39565377	39567752	chr1_PABPC4-:E012:upstream	chr1	39566566	39566567	rs3768320
chr12	132872393	132877556	chr12_CHFR-:E018:downstream	chr12	132873250	132873251	rs3782224
chr15	59163302	59171898	chr15_MYO1E-:E008:upstream	chr15	59165387	59165388	rs3794496
chr15	59163302	59171898	chr15_MYO1E-:E008:upstream	chr15	59164369	59164370	rs3794497
chr15	59163302	59171898	chr15_MYO1E-:E008:upstream	chr15	59164300	59164301	rs3794498
chr2	55010333	55025087	chr2_RTN4-:E008:upstream	chr2	55011540	55011541	rs3806572
chr2	55010333	55025087	chr2_RTN4-:E007:downstream	chr2	55011540	55011541	rs3806572
chr5	96425929	96429214	chr5_PCSK1-:E013:downstream	chr5	96426772	96426773	rs3811951
chr4	25415539	25416426	chr4_ANAPC4+:E036:downstream	chr4	25415621	25415622	rs3816587
chr1	31653675	31653868	chr1_COL16A1-:E004:downstream	chr1	31653829	31653830	rs3817398
chr13	32696901	32699731	chr13_PDS5B+:E020:upstream	chr13	32697636	32697637	rs3848087
chr3	154194717	154217870	chr3_ARHGEF26+:E013:downstream	chr3	154197112	154197113	rs386893
chr3	154191417	154194645	chr3_ARHGEF26+:E013:upstream	chr3	154193205	154193206	rs400529
chr11	13277922	13309988	chr11_ARNTL+:E006:downstream	chr11	13285057	13285058	rs4146388
chr5	123386666	123388305	chr5_CEP120-:E012:downstream	chr5	123387898	123387899	rs4348209
chr11	13277922	13309988	chr11_ARNTL+:E006:downstream	chr11	13284763	13284764	rs4414197
chr2	48569085	48776281	chr2_STON1-GTF2A1L+:E002:downstream	chr2	48728543	48728544	rs4596023
chr3	12312452	12349470	chr3_PPARG+:E008:downstream	chr3	12344837	12344838	rs4684847
chr11	13277922	13309988	chr11_ARNTL+:E006:downstream	chr11	13285547	13285548	rs4757141
chr11	13277922	13309988	chr11_ARNTL+:E006:downstream	chr11	13304147	13304148	rs4757142
chr11	13277922	13309988	chr11_ARNTL+:E006:downstream	chr11	13309678	13309679	rs4757144
chr11	13277922	13309988	chr11_ARNTL+:E006:downstream	chr11	13309776	13309777	rs4757145
chr16	29963588	29968026	chr16_TMEM219+:E009:downstream	chr16	29966240	29966241	rs4787486
chr16	28861746	28863396	chr16_SH2B1+:E003:upstream	chr16	28862076	28862077	rs4788102
chr8	86488638	86506996	chr8_RMDN1-:E016:downstream	chr8	86489480	86489481	rs4961196
chr3	136369281	136377661	chr3_STAG1-:E013:downstream	chr3	136376192	136376193	rs571513
chr13	32688568	32694224	chr13_PDS5B+:E018:upstream	chr13	32689576	32689577	rs590383
chr8	86488638	86506996	chr8_RMDN1-:E016:downstream	chr8	86500666	86500667	rs6415565
chr11	13277922	13309988	chr11_ARNTL+:E006:downstream	chr11	13298290	13298291	rs6486116
chr11	13277922	13309988	chr11_ARNTL+:E006:downstream	chr11	13302594	13302595	rs6486120
chr12	110537094	110538145	chr12_PPTC7-:E002:downstream	chr12	110537869	110537870	rs6606689
chr2	160407897	160493290	chr2_RBMS1-:E019:upstream	chr2	160411250	160411251	rs6752024
chr3	158110222	158122104	chr3_RSRC1+:E005:downstream	chr3	158118842	158118843	rs6790608
chr3	62078257	62132603	chr3_PTPRG+:E009:downstream	chr3	62125799	62125800	rs6798094
chr3	158110222	158122104	chr3_RSRC1+:E005:downstream	chr3	158119275	158119276	rs6803630
chr3	12351673	12379705	chr3_PPARG+:E011:downstream	chr3	12372920	12372921	rs6809832
chr1	39429325	39429828	chr1_MACF1+:E081:upstream	chr1	39429608	39429609	rs682571
chr8	117837200	118110086	chr8_EXT1-:E010:downstream	chr8	117874529	117874530	rs6991164
chr11	13277922	13309988	chr11_ARNTL+:E006:downstream	chr11	13291421	13291422	rs7107287
chr15	59163302	59171898	chr15_MYO1E-:E008:upstream	chr15	59167916	59167917	rs7181609
chr17	75763438	75763898	chr17_GALK1-:E006:downstream	chr17	75763470	75763471	rs7209235
chr11	13277922	13309988	chr11_ARNTL+:E006:downstream	chr11	13307431	13307432	rs7396943
chr8	86488638	86506996	chr8_RMDN1-:E016:downstream	chr8	86493173	86493174	rs7459811
chr8	86488638	86506996	chr8_RMDN1-:E016:downstream	chr8	86493521	86493522	rs7459897
chr2	160407897	160493290	chr2_RBMS1-:E019:upstream	chr2	160419339	160419340	rs7557636
chr2	48569085	48776281	chr2_STON1-GTF2A1L+:E002:downstream	chr2	48727765	48727766	rs7561278
chr2	55010333	55025087	chr2_RTN4-:E008:upstream	chr2	55024237	55024238	rs7601625
chr2	55010333	55025087	chr2_RTN4-:E007:downstream	chr2	55024237	55024238	rs7601625
chr3	158110222	158122104	chr3_RSRC1+:E005:downstream	chr3	158112163	158112164	rs7630176
chr3	12312452	12349470	chr3_PPARG+:E008:downstream	chr3	12342214	12342215	rs7638903
chr11	131370887	131581927	chr11_NTM+:E002:downstream	chr11	131579470	131579471	rs7925725
chr11	131370887	131581927	chr11_NTM+:E002:downstream	chr11	131579544	131579545	rs7925748
chr11	47487240	47488838	chr11_CELF1-:E022:upstream	chr11	47487584	47487585	rs7933019
chr11	13277922	13309988	chr11_ARNTL+:E006:downstream	chr11	13298346	13298347	rs7949336
chr11	13277922	13309988	chr11_ARNTL+:E006:downstream	chr11	13296883	13296884	rs7951393
chr5	158840109	158941695	chr5_EBF1-:E021:downstream	chr5	158852629	158852630	rs891903
chr13	32694303	32696855	chr13_PDS5B+:E018:downstream	chr13	32696213	32696214	rs9315177
chr13	32696901	32699731	chr13_PDS5B+:E020:upstream	chr13	32698296	32698297	rs9591252
chr13	32688568	32694224	chr13_PDS5B+:E018:upstream	chr13	32692146	32692147	rs9596075
chr13	32688568	32694224	chr13_PDS5B+:E018:upstream	chr13	32693514	32693515	rs9596076
chr17	63685589	63688528	chr17_MAP3K3+:E011:downstream	chr17	63688163	63688164	rs9901507
chr17	63685589	63688528	chr17_MAP3K3+:E011:downstream	chr17	63685847	63685848	rs9912201
chr17	63685589	63688528	chr17_MAP3K3+:E011:downstream	chr17	63686173	63686174	rs9912904
chr16	30059656	30064280	chr16_ALDOA+:E002:upstream	chr16	30061208	30061209	rs9928448

## Sheet: T2D lean day 3 vs day 15
exon_chr	exon_start	exon_end	exon_name	snp_chr	snp_start	snp_end	snp_name
chr1	120005587	120029907	chr1_NOTCH2-:E034:upstream	chr1	120009193	120009194	1-120551817
chr1	120005587	120029907	chr1_NOTCH2-:E034:upstream	chr1	120009316	120009317	1-120551940
chr1	120005587	120029907	chr1_NOTCH2-:E034:upstream	chr1	120009591	120009592	1-120552215
chr1	120005587	120029907	chr1_NOTCH2-:E034:upstream	chr1	120009722	120009723	1-120552346
chr1	120005587	120029907	chr1_NOTCH2-:E034:upstream	chr1	120011424	120011425	1-120554048
chr1	120005587	120029907	chr1_NOTCH2-:E034:upstream	chr1	120011510	120011511	1-120554134
chr1	120005587	120029907	chr1_NOTCH2-:E034:upstream	chr1	120017264	120017265	1-120559888
chr1	120005587	120029907	chr1_NOTCH2-:E034:upstream	chr1	120017318	120017319	1-120559942
chr1	120005587	120029907	chr1_NOTCH2-:E034:upstream	chr1	120024878	120024879	1-120567502
chr1	120005587	120029907	chr1_NOTCH2-:E034:upstream	chr1	120025177	120025178	1-120567801
chr1	120029986	120069335	chr1_NOTCH2-:E034:downstream	chr1	120035492	120035493	1-120578116
chr1	39310999	39315514	chr1_MACF1+:E040:upstream	chr1	39311486	39311487	1-39777159
chr1	39310999	39315514	chr1_MACF1+:E040:upstream	chr1	39314129	39314130	1-39779802
chr1	39424193	39427456	chr1_MACF1+:E078:upstream	chr1	39427101	39427102	1-39892774
chr1	39424193	39427456	chr1_MACF1+:E078:upstream	chr1	39427420	39427421	1-39893093
chr1	39429325	39429828	chr1_MACF1+:E081:upstream	chr1	39429787	39429788	1-39895460
chr1	39565377	39567752	chr1_PABPC4-:E012:upstream	chr1	39566566	39566567	1-40032239
chr1	39567845	39568803	chr1_PABPC4-:E012:downstream	chr1	39568232	39568233	1-40033905
chr2	160407897	160493290	chr2_RBMS1-:E019:upstream	chr2	160408559	160408560	2-161265071
chr2	160407897	160493290	chr2_RBMS1-:E019:upstream	chr2	160408587	160408588	2-161265099
chr2	160407897	160493290	chr2_RBMS1-:E019:upstream	chr2	160411250	160411251	2-161267762
chr2	160407897	160493290	chr2_RBMS1-:E019:upstream	chr2	160419339	160419340	2-161275851
chr2	160407897	160493290	chr2_RBMS1-:E019:upstream	chr2	160420477	160420478	2-161276989
chr2	160407897	160493290	chr2_RBMS1-:E019:upstream	chr2	160477360	160477361	2-161333872
chr2	27617570	27621154	chr2_ZNF512+:E018:upstream	chr2	27617772	27617773	2-27840640
chr3	12169905	12178360	chr3_SYN2+:E017:upstream	chr3	12174630	12174631	3-12216131
chr3	12169905	12178360	chr3_SYN2+:E017:upstream	chr3	12174759	12174760	3-12216260
chr3	12169905	12178360	chr3_SYN2+:E017:upstream	chr3	12176296	12176297	3-12217797
chr3	12179397	12183313	chr3_SYN2+:E017:downstream	chr3	12179923	12179924	3-12221424
chr3	12312452	12349470	chr3_PPARG+:E008:downstream	chr3	12312493	12312494	3-12353993
chr3	12312452	12349470	chr3_PPARG+:E008:downstream	chr3	12314658	12314659	3-12356158
chr3	12312452	12349470	chr3_PPARG+:E008:downstream	chr3	12314696	12314697	3-12356196
chr3	12312452	12349470	chr3_PPARG+:E008:downstream	chr3	12314887	12314888	3-12356387
chr3	12312452	12349470	chr3_PPARG+:E008:downstream	chr3	12315105	12315106	3-12356605
chr3	12312452	12349470	chr3_PPARG+:E008:downstream	chr3	12315125	12315126	3-12356625
chr3	12312452	12349470	chr3_PPARG+:E008:downstream	chr3	12316730	12316731	3-12358230
chr3	12312452	12349470	chr3_PPARG+:E008:downstream	chr3	12316992	12316993	3-12358492
chr3	12312452	12349470	chr3_PPARG+:E008:downstream	chr3	12317549	12317550	3-12359049
chr3	12312452	12349470	chr3_PPARG+:E008:downstream	chr3	12318714	12318715	3-12360214
chr3	12312452	12349470	chr3_PPARG+:E008:downstream	chr3	12319269	12319270	3-12360769
chr3	12312452	12349470	chr3_PPARG+:E008:downstream	chr3	12319795	12319796	3-12361295
chr3	12312452	12349470	chr3_PPARG+:E008:downstream	chr3	12319885	12319886	3-12361385
chr3	12312452	12349470	chr3_PPARG+:E008:downstream	chr3	12320429	12320430	3-12361929
chr3	12312452	12349470	chr3_PPARG+:E008:downstream	chr3	12322137	12322138	3-12363637
chr3	12312452	12349470	chr3_PPARG+:E008:downstream	chr3	12322913	12322914	3-12364413
chr3	12312452	12349470	chr3_PPARG+:E008:downstream	chr3	12323203	12323204	3-12364703
chr3	12312452	12349470	chr3_PPARG+:E008:downstream	chr3	12323808	12323809	3-12365308
chr3	12312452	12349470	chr3_PPARG+:E008:downstream	chr3	12325563	12325564	3-12367063
chr3	12312452	12349470	chr3_PPARG+:E008:downstream	chr3	12325605	12325606	3-12367105
chr3	12312452	12349470	chr3_PPARG+:E008:downstream	chr3	12326733	12326734	3-12368233
chr3	12312452	12349470	chr3_PPARG+:E008:downstream	chr3	12327901	12327902	3-12369401
chr3	12312452	12349470	chr3_PPARG+:E008:downstream	chr3	12328583	12328584	3-12370083
chr3	12312452	12349470	chr3_PPARG+:E008:downstream	chr3	12329582	12329583	3-12371082
chr3	12312452	12349470	chr3_PPARG+:E008:downstream	chr3	12330128	12330129	3-12371628
chr3	12312452	12349470	chr3_PPARG+:E008:downstream	chr3	12330574	12330575	3-12372074
chr3	12312452	12349470	chr3_PPARG+:E008:downstream	chr3	12330886	12330887	3-12372386
chr3	12312452	12349470	chr3_PPARG+:E008:downstream	chr3	12331382	12331383	3-12372882
chr3	12312452	12349470	chr3_PPARG+:E008:downstream	chr3	12331923	12331924	3-12373423
chr3	12312452	12349470	chr3_PPARG+:E008:downstream	chr3	12332167	12332168	3-12373667
chr3	12312452	12349470	chr3_PPARG+:E008:downstream	chr3	12332278	12332279	3-12373778
chr3	12312452	12349470	chr3_PPARG+:E008:downstream	chr3	12333891	12333892	3-12375391
chr3	12312452	12349470	chr3_PPARG+:E008:downstream	chr3	12334456	12334457	3-12375956
chr3	12312452	12349470	chr3_PPARG+:E008:downstream	chr3	12334914	12334915	3-12376414
chr3	12312452	12349470	chr3_PPARG+:E008:downstream	chr3	12335245	12335246	3-12376745
chr3	12312452	12349470	chr3_PPARG+:E008:downstream	chr3	12335794	12335795	3-12377294
chr3	12312452	12349470	chr3_PPARG+:E008:downstream	chr3	12335844	12335845	3-12377344
chr3	12312452	12349470	chr3_PPARG+:E008:downstream	chr3	12337423	12337424	3-12378923
chr3	12312452	12349470	chr3_PPARG+:E008:downstream	chr3	12337851	12337852	3-12379351
chr3	12312452	12349470	chr3_PPARG+:E008:downstream	chr3	12338001	12338002	3-12379501
chr3	12312452	12349470	chr3_PPARG+:E008:downstream	chr3	12338408	12338409	3-12379908
chr3	12312452	12349470	chr3_PPARG+:E008:downstream	chr3	12339665	12339666	3-12381165
chr3	12312452	12349470	chr3_PPARG+:E008:downstream	chr3	12339910	12339911	3-12381410
chr3	12312452	12349470	chr3_PPARG+:E008:downstream	chr3	12341765	12341766	3-12383265
chr3	12312452	12349470	chr3_PPARG+:E008:downstream	chr3	12342214	12342215	3-12383714
chr3	12312452	12349470	chr3_PPARG+:E008:downstream	chr3	12344328	12344329	3-12385828
chr3	12312452	12349470	chr3_PPARG+:E008:downstream	chr3	12344837	12344838	3-12386337
chr3	12312452	12349470	chr3_PPARG+:E008:downstream	chr3	12346909	12346910	3-12388409
chr3	12312452	12349470	chr3_PPARG+:E008:downstream	chr3	12347813	12347814	3-12389313
chr3	12312452	12349470	chr3_PPARG+:E008:downstream	chr3	12348984	12348985	3-12390484
chr3	12351673	12379705	chr3_PPARG+:E011:downstream	chr3	12352182	12352183	3-12393682
chr3	12351673	12379705	chr3_PPARG+:E011:downstream	chr3	12353340	12353341	3-12394840
chr3	12351673	12379705	chr3_PPARG+:E011:downstream	chr3	12354145	12354146	3-12395645
chr3	12351673	12379705	chr3_PPARG+:E011:downstream	chr3	12354458	12354459	3-12395958
chr3	12351673	12379705	chr3_PPARG+:E011:downstream	chr3	12355088	12355089	3-12396588
chr3	12351673	12379705	chr3_PPARG+:E011:downstream	chr3	12355345	12355346	3-12396845
chr3	12351673	12379705	chr3_PPARG+:E011:downstream	chr3	12355413	12355414	3-12396913
chr3	12351673	12379705	chr3_PPARG+:E011:downstream	chr3	12355455	12355456	3-12396955
chr3	12351673	12379705	chr3_PPARG+:E011:downstream	chr3	12371839	12371840	3-12413339
chr3	23271165	23332170	chr3_UBE2E2+:E007:upstream	chr3	23271421	23271422	3-23312913
chr3	23271165	23332170	chr3_UBE2E2+:E007:upstream	chr3	23272238	23272239	3-23313730
chr3	23271165	23332170	chr3_UBE2E2+:E007:upstream	chr3	23272284	23272285	3-23313776
chr3	23271165	23332170	chr3_UBE2E2+:E007:upstream	chr3	23272598	23272599	3-23314090
chr3	23271165	23332170	chr3_UBE2E2+:E007:upstream	chr3	23273047	23273048	3-23314539
chr3	23271165	23332170	chr3_UBE2E2+:E007:upstream	chr3	23273255	23273256	3-23314747
chr3	23271165	23332170	chr3_UBE2E2+:E007:upstream	chr3	23273372	23273373	3-23314864
chr3	23271165	23332170	chr3_UBE2E2+:E007:upstream	chr3	23273706	23273707	3-23315198
chr3	23271165	23332170	chr3_UBE2E2+:E007:upstream	chr3	23274375	23274376	3-23315867
chr3	23271165	23332170	chr3_UBE2E2+:E007:upstream	chr3	23276432	23276433	3-23317924
chr3	23271165	23332170	chr3_UBE2E2+:E007:upstream	chr3	23276652	23276653	3-23318144
chr3	23271165	23332170	chr3_UBE2E2+:E007:upstream	chr3	23280428	23280429	3-23321920
chr3	23271165	23332170	chr3_UBE2E2+:E007:upstream	chr3	23281134	23281135	3-23322626
chr3	23271165	23332170	chr3_UBE2E2+:E007:upstream	chr3	23281659	23281660	3-23323151
chr3	23271165	23332170	chr3_UBE2E2+:E007:upstream	chr3	23283528	23283529	3-23325020
chr3	23271165	23332170	chr3_UBE2E2+:E007:upstream	chr3	23284498	23284499	3-23325990
chr3	23271165	23332170	chr3_UBE2E2+:E007:upstream	chr3	23286750	23286751	3-23328242
chr3	23271165	23332170	chr3_UBE2E2+:E007:upstream	chr3	23288303	23288304	3-23329795
chr3	23271165	23332170	chr3_UBE2E2+:E007:upstream	chr3	23289443	23289444	3-23330935
chr3	23271165	23332170	chr3_UBE2E2+:E007:upstream	chr3	23290460	23290461	3-23331952
chr3	23271165	23332170	chr3_UBE2E2+:E007:upstream	chr3	23291292	23291293	3-23332784
chr3	23271165	23332170	chr3_UBE2E2+:E007:upstream	chr3	23292112	23292113	3-23333604
chr3	23271165	23332170	chr3_UBE2E2+:E007:upstream	chr3	23294958	23294959	3-23336450
chr3	23271165	23332170	chr3_UBE2E2+:E007:upstream	chr3	23295488	23295489	3-23336980
chr3	23271165	23332170	chr3_UBE2E2+:E007:upstream	chr3	23295729	23295730	3-23337221
chr3	23271165	23332170	chr3_UBE2E2+:E007:upstream	chr3	23296313	23296314	3-23337805
chr3	23271165	23332170	chr3_UBE2E2+:E007:upstream	chr3	23296519	23296520	3-23338011
chr3	23271165	23332170	chr3_UBE2E2+:E007:upstream	chr3	23296551	23296552	3-23338043
chr3	23271165	23332170	chr3_UBE2E2+:E007:upstream	chr3	23297614	23297615	3-23339106
chr3	23271165	23332170	chr3_UBE2E2+:E007:upstream	chr3	23298995	23298996	3-23340487
chr3	23271165	23332170	chr3_UBE2E2+:E007:upstream	chr3	23299201	23299202	3-23340693
chr3	23271165	23332170	chr3_UBE2E2+:E007:upstream	chr3	23299376	23299377	3-23340868
chr3	23271165	23332170	chr3_UBE2E2+:E007:upstream	chr3	23301865	23301866	3-23343357
chr3	23271165	23332170	chr3_UBE2E2+:E007:upstream	chr3	23301884	23301885	3-23343376
chr3	23271165	23332170	chr3_UBE2E2+:E007:upstream	chr3	23302891	23302892	3-23344383
chr3	23271165	23332170	chr3_UBE2E2+:E007:upstream	chr3	23303087	23303088	3-23344579
chr3	23271165	23332170	chr3_UBE2E2+:E007:upstream	chr3	23304370	23304371	3-23345862
chr3	23271165	23332170	chr3_UBE2E2+:E007:upstream	chr3	23304554	23304555	3-23346046
chr3	23271165	23332170	chr3_UBE2E2+:E007:upstream	chr3	23305040	23305041	3-23346532
chr3	23271165	23332170	chr3_UBE2E2+:E007:upstream	chr3	23305303	23305304	3-23346795
chr3	23271165	23332170	chr3_UBE2E2+:E007:upstream	chr3	23306190	23306191	3-23347682
chr3	23271165	23332170	chr3_UBE2E2+:E007:upstream	chr3	23308283	23308284	3-23349775
chr3	23271165	23332170	chr3_UBE2E2+:E007:upstream	chr3	23308974	23308975	3-23350466
chr3	23271165	23332170	chr3_UBE2E2+:E007:upstream	chr3	23311077	23311078	3-23352569
chr3	23271165	23332170	chr3_UBE2E2+:E007:upstream	chr3	23312631	23312632	3-23354123
chr3	23271165	23332170	chr3_UBE2E2+:E007:upstream	chr3	23313146	23313147	3-23354638
chr3	23271165	23332170	chr3_UBE2E2+:E007:upstream	chr3	23315799	23315800	3-23357291
chr3	23271165	23332170	chr3_UBE2E2+:E007:upstream	chr3	23318593	23318594	3-23360085
chr3	23271165	23332170	chr3_UBE2E2+:E007:upstream	chr3	23319135	23319136	3-23360627
chr3	23271165	23332170	chr3_UBE2E2+:E007:upstream	chr3	23319971	23319972	3-23361463
chr3	23271165	23332170	chr3_UBE2E2+:E007:upstream	chr3	23322366	23322367	3-23363858
chr3	23271165	23332170	chr3_UBE2E2+:E007:upstream	chr3	23327848	23327849	3-23369340
chr3	23271165	23332170	chr3_UBE2E2+:E007:upstream	chr3	23327868	23327869	3-23369360
chr3	23271165	23332170	chr3_UBE2E2+:E007:upstream	chr3	23328252	23328253	3-23369744
chr3	23271165	23332170	chr3_UBE2E2+:E007:upstream	chr3	23330144	23330145	3-23371636
chr3	23271165	23332170	chr3_UBE2E2+:E007:upstream	chr3	23332154	23332155	3-23373646
chr3	23343231	23345867	chr3_UBE2E2+:E007:downstream	chr3	23343716	23343717	3-23385208
chr3	23343231	23345867	chr3_UBE2E2+:E007:downstream	chr3	23344385	23344386	3-23385877
chr3	23343231	23345867	chr3_UBE2E2+:E007:downstream	chr3	23344450	23344451	3-23385942
chr3	23343231	23345867	chr3_UBE2E2+:E007:downstream	chr3	23344804	23344805	3-23386296
chr3	23343231	23345867	chr3_UBE2E2+:E007:downstream	chr3	23345079	23345080	3-23386571
chr3	23343231	23345867	chr3_UBE2E2+:E007:downstream	chr3	23345388	23345389	3-23386880
chr3	23343231	23345867	chr3_UBE2E2+:E007:downstream	chr3	23345453	23345454	3-23386945
chr3	23343231	23345867	chr3_UBE2E2+:E007:downstream	chr3	23345464	23345465	3-23386956
chr3	23343231	23345867	chr3_UBE2E2+:E007:downstream	chr3	23345521	23345522	3-23387013
chr3	47169395	47231768	chr3_KIF9-AS1+:E002:downstream	chr3	47201432	47201433	3-47242923
chr3	47169395	47231768	chr3_KIF9-AS1+:E002:downstream	chr3	47205569	47205570	3-47247060
chr3	47169395	47231768	chr3_KIF9-AS1+:E002:downstream	chr3	47209793	47209794	3-47251284
chr4	156772892	156810838	chr4_PDGFC-:E005:downstream	chr4	156783306	156783307	4-157704459
chr4	184788730	184803321	chr4_ACSL1-:E022:upstream	chr4	184792453	184792454	4-185713608
chr4	184788730	184803321	chr4_ACSL1-:E022:upstream	chr4	184793134	184793135	4-185714289
chr4	184788730	184803321	chr4_ACSL1-:E022:upstream	chr4	184793801	184793802	4-185714956
chr4	184788730	184803321	chr4_ACSL1-:E022:upstream	chr4	184794110	184794111	4-185715265
chr4	184788730	184803321	chr4_ACSL1-:E022:upstream	chr4	184794131	184794132	4-185715286
chr4	184788730	184803321	chr4_ACSL1-:E022:upstream	chr4	184794169	184794170	4-185715324
chr4	184788730	184803321	chr4_ACSL1-:E022:upstream	chr4	184794451	184794452	4-185715606
chr4	184788730	184803321	chr4_ACSL1-:E022:upstream	chr4	184794530	184794531	4-185715685
chr4	184788730	184803321	chr4_ACSL1-:E022:upstream	chr4	184794531	184794532	4-185715686
chr4	184788730	184803321	chr4_ACSL1-:E022:upstream	chr4	184794534	184794535	4-185715689
chr4	184788730	184803321	chr4_ACSL1-:E022:upstream	chr4	184794697	184794698	4-185715852
chr4	184788730	184803321	chr4_ACSL1-:E022:upstream	chr4	184794746	184794747	4-185715901
chr4	184788730	184803321	chr4_ACSL1-:E022:upstream	chr4	184794902	184794903	4-185716057
chr4	184788730	184803321	chr4_ACSL1-:E022:upstream	chr4	184794945	184794946	4-185716100
chr4	184788730	184803321	chr4_ACSL1-:E022:upstream	chr4	184795077	184795078	4-185716232
chr4	184788730	184803321	chr4_ACSL1-:E022:upstream	chr4	184795334	184795335	4-185716489
chr4	184788730	184803321	chr4_ACSL1-:E022:upstream	chr4	184795451	184795452	4-185716606
chr4	184788730	184803321	chr4_ACSL1-:E022:upstream	chr4	184795462	184795463	4-185716617
chr4	184788730	184803321	chr4_ACSL1-:E022:upstream	chr4	184795498	184795499	4-185716653
chr4	184788730	184803321	chr4_ACSL1-:E022:upstream	chr4	184795782	184795783	4-185716937
chr4	184788730	184803321	chr4_ACSL1-:E022:upstream	chr4	184795929	184795930	4-185717084
chr4	184788730	184803321	chr4_ACSL1-:E022:upstream	chr4	184796090	184796091	4-185717245
chr4	184788730	184803321	chr4_ACSL1-:E022:upstream	chr4	184796147	184796148	4-185717302
chr4	184788730	184803321	chr4_ACSL1-:E022:upstream	chr4	184796322	184796323	4-185717477
chr4	184788730	184803321	chr4_ACSL1-:E022:upstream	chr4	184796468	184796469	4-185717623
chr4	184788730	184803321	chr4_ACSL1-:E022:upstream	chr4	184796473	184796474	4-185717628
chr4	184788730	184803321	chr4_ACSL1-:E022:upstream	chr4	184796589	184796590	4-185717744
chr4	184788730	184803321	chr4_ACSL1-:E022:upstream	chr4	184796604	184796605	4-185717759
chr4	184788730	184803321	chr4_ACSL1-:E022:upstream	chr4	184796648	184796649	4-185717803
chr4	184788730	184803321	chr4_ACSL1-:E022:upstream	chr4	184796954	184796955	4-185718109
chr4	184788730	184803321	chr4_ACSL1-:E022:upstream	chr4	184796977	184796978	4-185718132
chr4	184788730	184803321	chr4_ACSL1-:E022:upstream	chr4	184797066	184797067	4-185718221
chr4	184788730	184803321	chr4_ACSL1-:E022:upstream	chr4	184797145	184797146	4-185718300
chr4	184788730	184803321	chr4_ACSL1-:E022:upstream	chr4	184797331	184797332	4-185718486
chr4	184788730	184803321	chr4_ACSL1-:E022:upstream	chr4	184797338	184797339	4-185718493
chr4	184788730	184803321	chr4_ACSL1-:E022:upstream	chr4	184797364	184797365	4-185718519
chr4	184788730	184803321	chr4_ACSL1-:E022:upstream	chr4	184797451	184797452	4-185718606
chr4	184788730	184803321	chr4_ACSL1-:E022:upstream	chr4	184797572	184797573	4-185718727
chr4	184788730	184803321	chr4_ACSL1-:E022:upstream	chr4	184797621	184797622	4-185718776
chr4	184788730	184803321	chr4_ACSL1-:E022:upstream	chr4	184797969	184797970	4-185719124
chr4	184788730	184803321	chr4_ACSL1-:E022:upstream	chr4	184797971	184797972	4-185719126
chr4	184788730	184803321	chr4_ACSL1-:E022:upstream	chr4	184797996	184797997	4-185719151
chr4	184788730	184803321	chr4_ACSL1-:E022:upstream	chr4	184800215	184800216	4-185721370
chr4	184788730	184803321	chr4_ACSL1-:E022:upstream	chr4	184801292	184801293	4-185722447
chr4	184788730	184803321	chr4_ACSL1-:E022:upstream	chr4	184802656	184802657	4-185723811
chr4	184815123	184825917	chr4_ACSL1-:E031:upstream	chr4	184816688	184816689	4-185737843
chr5	75338302	75342584	chr5_HMGCR+:E006:upstream	chr5	75340658	75340659	5-74636484
chr5	75338302	75342584	chr5_HMGCR+:E006:upstream	chr5	75341885	75341886	5-74637711
chr5	75342769	75343854	chr5_HMGCR+:E006:downstream	chr5	75343352	75343353	5-74639178
chr5	75342769	75343854	chr5_HMGCR+:E006:downstream	chr5	75343433	75343434	5-74639259
chr5	77118520	77147653	chr5_ZBED3-AS1+:E004:upstream	chr5	77129123	77129124	5-76424949
chr5	77118520	77147653	chr5_ZBED3-AS1+:E003:downstream	chr5	77129123	77129124	5-76424949
chr5	77118520	77147653	chr5_ZBED3-AS1+:E004:upstream	chr5	77129234	77129235	5-76425060
chr5	77118520	77147653	chr5_ZBED3-AS1+:E003:downstream	chr5	77129234	77129235	5-76425060
chr5	77118520	77147653	chr5_ZBED3-AS1+:E004:upstream	chr5	77130041	77130042	5-76425867
chr5	77118520	77147653	chr5_ZBED3-AS1+:E003:downstream	chr5	77130041	77130042	5-76425867
chr5	77118520	77147653	chr5_ZBED3-AS1+:E004:upstream	chr5	77131485	77131486	5-76427311
chr5	77118520	77147653	chr5_ZBED3-AS1+:E003:downstream	chr5	77131485	77131486	5-76427311
chr5	77118520	77147653	chr5_ZBED3-AS1+:E004:upstream	chr5	77134810	77134811	5-76430636
chr5	77118520	77147653	chr5_ZBED3-AS1+:E003:downstream	chr5	77134810	77134811	5-76430636
chr5	77118520	77147653	chr5_ZBED3-AS1+:E004:upstream	chr5	77139178	77139179	5-76435004
chr5	77118520	77147653	chr5_ZBED3-AS1+:E003:downstream	chr5	77139178	77139179	5-76435004
chr5	77118520	77147653	chr5_ZBED3-AS1+:E004:upstream	chr5	77139520	77139521	5-76435346
chr5	77118520	77147653	chr5_ZBED3-AS1+:E003:downstream	chr5	77139520	77139521	5-76435346
chr5	77118520	77147653	chr5_ZBED3-AS1+:E004:upstream	chr5	77143424	77143425	5-76439250
chr5	77118520	77147653	chr5_ZBED3-AS1+:E003:downstream	chr5	77143424	77143425	5-76439250
chr6	32082325	32084414	chr6_TNXB-:E039:downstream	chr6	32082766	32082767	6-32050544
chr6	32098205	32109182	chr6_TNXB-:E046:downstream	chr6	32099041	32099042	6-32066819
chr6	32098205	32109182	chr6_TNXB-:E046:downstream	chr6	32102028	32102029	6-32069806
chr6	32098205	32109182	chr6_TNXB-:E046:downstream	chr6	32103239	32103240	6-32071017
chr6	32098205	32109182	chr6_TNXB-:E046:downstream	chr6	32104115	32104116	6-32071893
chr7	157170449	157174920	chr7_UBE3C+:E007:upstream	chr7	157170829	157170830	7-156963524
chr7	157170449	157174920	chr7_UBE3C+:E007:upstream	chr7	157171036	157171037	7-156963731
chr7	157170449	157174920	chr7_UBE3C+:E007:upstream	chr7	157171229	157171230	7-156963924
chr7	157170449	157174920	chr7_UBE3C+:E007:upstream	chr7	157171799	157171800	7-156964494
chr7	157170449	157174920	chr7_UBE3C+:E007:upstream	chr7	157171925	157171926	7-156964620
chr7	157170449	157174920	chr7_UBE3C+:E007:upstream	chr7	157172542	157172543	7-156965237
chr7	157170449	157174920	chr7_UBE3C+:E007:upstream	chr7	157172602	157172603	7-156965297
chr7	157175033	157178691	chr7_UBE3C+:E008:upstream	chr7	157175628	157175629	7-156968323
chr7	157175033	157178691	chr7_UBE3C+:E007:downstream	chr7	157175628	157175629	7-156968323
chr7	157175033	157178691	chr7_UBE3C+:E008:upstream	chr7	157177359	157177360	7-156970054
chr7	157175033	157178691	chr7_UBE3C+:E007:downstream	chr7	157177359	157177360	7-156970054
chr7	157175033	157178691	chr7_UBE3C+:E008:upstream	chr7	157177511	157177512	7-156970206
chr7	157175033	157178691	chr7_UBE3C+:E007:downstream	chr7	157177511	157177512	7-156970206
chr7	157175033	157178691	chr7_UBE3C+:E008:upstream	chr7	157177586	157177587	7-156970281
chr7	157175033	157178691	chr7_UBE3C+:E007:downstream	chr7	157177586	157177587	7-156970281
chr7	157175033	157178691	chr7_UBE3C+:E008:upstream	chr7	157177868	157177869	7-156970563
chr7	157175033	157178691	chr7_UBE3C+:E007:downstream	chr7	157177868	157177869	7-156970563
chr7	157175033	157178691	chr7_UBE3C+:E008:upstream	chr7	157177914	157177915	7-156970609
chr7	157175033	157178691	chr7_UBE3C+:E007:downstream	chr7	157177914	157177915	7-156970609
chr7	157178846	157181519	chr7_UBE3C+:E008:downstream	chr7	157178886	157178887	7-156971581
chr7	157178846	157181519	chr7_UBE3C+:E008:downstream	chr7	157181432	157181433	7-156974127
chr11	17075622	17077169	chr11_RPS13-:E004:upstream	chr11	17076147	17076148	11-17097695
chr11	17075622	17077169	chr11_RPS13-:E004:upstream	chr11	17076318	17076319	11-17097866
chr11	72713242	72714153	chr11_ARAP1-:E031:downstream	chr11	72713588	72713589	11-72424634
chr11	72714320	72721851	chr11_ARAP1-:E033:upstream	chr11	72716065	72716066	11-72427111
chr11	72714320	72721851	chr11_ARAP1-:E033:upstream	chr11	72716509	72716510	11-72427555
chr11	72714320	72721851	chr11_ARAP1-:E033:upstream	chr11	72716992	72716993	11-72428038
chr11	72714320	72721851	chr11_ARAP1-:E033:upstream	chr11	72717102	72717103	11-72428148
chr11	72714320	72721851	chr11_ARAP1-:E033:upstream	chr11	72717126	72717127	11-72428172
chr11	72714320	72721851	chr11_ARAP1-:E033:upstream	chr11	72718095	72718096	11-72429141
chr11	72714320	72721851	chr11_ARAP1-:E033:upstream	chr11	72718533	72718534	11-72429579
chr11	72714320	72721851	chr11_ARAP1-:E033:upstream	chr11	72720633	72720634	11-72431679
chr11	72722357	72726621	chr11_ARAP1-:E033:downstream	chr11	72722874	72722875	11-72433920
chr11	72722357	72726621	chr11_ARAP1-:E033:downstream	chr11	72724937	72724938	11-72435983
chr11	72722357	72726621	chr11_ARAP1-:E033:downstream	chr11	72724950	72724951	11-72435996
chr14	91485729	91490748	chr14_PPP4R3A-:E020:upstream	chr14	91488162	91488163	14-91954507
chr14	91485729	91490748	chr14_PPP4R3A-:E020:upstream	chr14	91488544	91488545	14-91954889
chr14	91485729	91490748	chr14_PPP4R3A-:E020:upstream	chr14	91489197	91489198	14-91955542
chr14	91490801	91509507	chr14_PPP4R3A-:E020:downstream	chr14	91491040	91491041	14-91957385
chr14	91490801	91509507	chr14_PPP4R3A-:E020:downstream	chr14	91493878	91493879	14-91960223
chr14	91490801	91509507	chr14_PPP4R3A-:E020:downstream	chr14	91494439	91494440	14-91960784
chr14	91490801	91509507	chr14_PPP4R3A-:E020:downstream	chr14	91494527	91494528	14-91960872
chr14	91490801	91509507	chr14_PPP4R3A-:E020:downstream	chr14	91494843	91494844	14-91961188
chr14	91490801	91509507	chr14_PPP4R3A-:E020:downstream	chr14	91496181	91496182	14-91962526
chr14	91490801	91509507	chr14_PPP4R3A-:E020:downstream	chr14	91497377	91497378	14-91963722
chr14	91490801	91509507	chr14_PPP4R3A-:E020:downstream	chr14	91498529	91498530	14-91964874
chr14	91490801	91509507	chr14_PPP4R3A-:E020:downstream	chr14	91500286	91500287	14-91966631
chr14	91490801	91509507	chr14_PPP4R3A-:E020:downstream	chr14	91501321	91501322	14-91967666
chr14	91490801	91509507	chr14_PPP4R3A-:E020:downstream	chr14	91501782	91501783	14-91968127
chr14	91490801	91509507	chr14_PPP4R3A-:E020:downstream	chr14	91501968	91501969	14-91968313
chr14	91490801	91509507	chr14_PPP4R3A-:E020:downstream	chr14	91504920	91504921	14-91971265
chr14	91490801	91509507	chr14_PPP4R3A-:E020:downstream	chr14	91505238	91505239	14-91971583
chr14	91490801	91509507	chr14_PPP4R3A-:E020:downstream	chr14	91506407	91506408	14-91972752
chr15	63729648	63732925	chr15_HERC1-:E071:downstream	chr15	63729994	63729995	15-64022194
chr16	243899	248349	chr16_FAM234A+:E012:upstream	chr16	244243	244244	16-294243
chr16	243899	248349	chr16_FAM234A+:E012:upstream	chr16	244749	244750	16-294749
chr16	243899	248349	chr16_FAM234A+:E012:upstream	chr16	245117	245118	16-295117
chr16	243899	248349	chr16_FAM234A+:E012:upstream	chr16	245718	245719	16-295718
chr16	243899	248349	chr16_FAM234A+:E012:upstream	chr16	245795	245796	16-295795
chr16	243899	248349	chr16_FAM234A+:E012:upstream	chr16	246184	246185	16-296184
chr16	243899	248349	chr16_FAM234A+:E012:upstream	chr16	247510	247511	16-297510
chr16	243899	248349	chr16_FAM234A+:E012:upstream	chr16	247671	247672	16-297671
chr16	243899	248349	chr16_FAM234A+:E012:upstream	chr16	247750	247751	16-297750
chr16	29963588	29968026	chr16_TMEM219+:E009:downstream	chr16	29966240	29966241	16-29977562
chr16	29963588	29968026	chr16_TMEM219+:E009:downstream	chr16	29966681	29966682	16-29978003
chr16	29963588	29968026	chr16_TMEM219+:E009:downstream	chr16	29967505	29967506	16-29978827
chr22	31944819	31956140	chr22_YWHAH+:E002:upstream	chr22	31948415	31948416	22-32344403
chr22	31944819	31956140	chr22_YWHAH+:E002:upstream	chr22	31952853	31952854	22-32348841

## Sheet: BMI obese conf vs day 3
exon_chr	exon_start	exon_end	exon_name	snp_chr	snp_start	snp_end	snp_name
chr10	132195008	132196862	chr10_DPYSL4+:E010:upstream	chr10	132195307	132195308	rs10781563
chr10	63269222	63380319	chr10_JMJD1C-:E031:upstream	chr10	63290898	63290899	rs7075195
chr10	63269222	63380319	chr10_JMJD1C-:E031:upstream	chr10	63288545	63288546	rs7080386
chr10	63269222	63380319	chr10_JMJD1C-:E031:upstream	chr10	63302247	63302248	rs10761739
chr10	63269222	63380319	chr10_JMJD1C-:E031:upstream	chr10	63306425	63306426	rs10761741
chr10	63269222	63380319	chr10_JMJD1C-:E031:upstream	chr10	63310677	63310678	rs7070296
chr10	63269222	63380319	chr10_JMJD1C-:E031:upstream	chr10	63325287	63325288	rs10761742
chr10	63269222	63380319	chr10_JMJD1C-:E031:upstream	chr10	63331349	63331350	rs12783001
chr10	63269222	63380319	chr10_JMJD1C-:E031:upstream	chr10	63341446	63341447	rs10740118
chr10	63269222	63380319	chr10_JMJD1C-:E031:upstream	chr10	63364337	63364338	rs10822163
chr10	63269222	63380319	chr10_JMJD1C-:E031:upstream	chr10	63361804	63361805	rs12355784
chr10	63269222	63380319	chr10_JMJD1C-:E031:upstream	chr10	63358084	63358085	rs12772006
chr10	63269222	63380319	chr10_JMJD1C-:E031:upstream	chr10	63367071	63367072	rs6479896
chr10	63269222	63380319	chr10_JMJD1C-:E031:upstream	chr10	63378838	63378839	rs17740722
chr10	63269222	63380319	chr10_JMJD1C-:E031:upstream	chr10	63375053	63375054	rs2393966
chr10	63269222	63380319	chr10_JMJD1C-:E031:upstream	chr10	63375017	63375018	rs2893919
chr10	63269222	63380319	chr10_JMJD1C-:E031:upstream	chr10	63375911	63375912	rs7076310
chr10	63269222	63380319	chr10_JMJD1C-:E031:upstream	chr10	63379149	63379150	rs7910927
chr10	63269222	63380319	chr10_JMJD1C-:E031:upstream	chr10	63374061	63374062	rs7923609
chr10	21617206	21622331	chr10_MLLT10+:E026:upstream	chr10	21618086	21618087	rs1243187
chr10	21617206	21622331	chr10_MLLT10+:E026:upstream	chr10	21619873	21619874	rs1243188
chr10	91271696	91278270	chr10_PCGF5+:E019:upstream	chr10	91273185	91273186	rs2631681
chr10	116889278	116894101	chr10_SHTN1-:E005:upstream	chr10	116891484	116891485	rs10510025
chr10	116889278	116894101	chr10_SHTN1-:E005:upstream	chr10	116891499	116891500	rs2531686
chr10	116889278	116894101	chr10_SHTN1-:E005:upstream	chr10	116889329	116889330	rs3781566
chr10	116889278	116894101	chr10_SHTN1-:E005:upstream	chr10	116892370	116892371	rs740600
chr10	102744142	102776132	chr10_WBP1L+:E003:upstream	chr10	102744806	102744807	rs999867
chr11	43641033	43680739	chr11_HSD17B12+:E006:upstream	chr11	43642965	43642966	rs10768970
chr11	43641033	43680739	chr11_HSD17B12+:E006:upstream	chr11	43669166	43669167	rs17596617
chr11	43641033	43680739	chr11_HSD17B12+:E006:upstream	chr11	43663617	43663618	rs4755731
chr11	43641033	43680739	chr11_HSD17B12+:E006:upstream	chr11	43674448	43674449	rs4755732
chr11	43641033	43680739	chr11_HSD17B12+:E006:upstream	chr11	43665067	43665068	rs6485438
chr11	43641033	43680739	chr11_HSD17B12+:E006:upstream	chr11	43674765	43674766	rs6485443
chr11	43641033	43680739	chr11_HSD17B12+:E006:upstream	chr11	43675366	43675367	rs7116641
chr11	43641033	43680739	chr11_HSD17B12+:E006:upstream	chr11	43676948	43676949	rs7928182
chr11	43641033	43680739	chr11_HSD17B12+:E006:upstream	chr11	43673823	43673824	rs7944241
chr11	43641033	43680739	chr11_HSD17B12+:E006:upstream	chr11	43667650	43667651	rs7948411
chr11	43840063	43854716	chr11_HSD17B12+:E018:upstream	chr11	43840197	43840198	rs10734518
chr11	43840063	43854716	chr11_HSD17B12+:E018:upstream	chr11	43842727	43842728	rs2176598
chr11	43840063	43854716	chr11_HSD17B12+:E018:upstream	chr11	43840774	43840775	rs9971535
chr11	43840063	43854716	chr11_HSD17B12+:E018:upstream	chr11	43848309	43848310	rs10838184
chr11	43840063	43854716	chr11_HSD17B12+:E018:upstream	chr11	43848388	43848389	rs10838185
chr11	43840063	43854716	chr11_HSD17B12+:E018:upstream	chr11	43848429	43848430	rs10838186
chr11	43840063	43854716	chr11_HSD17B12+:E018:upstream	chr11	43848272	43848273	rs11037674
chr11	43840063	43854716	chr11_HSD17B12+:E018:upstream	chr11	43849661	43849662	rs11037676
chr11	43840063	43854716	chr11_HSD17B12+:E018:upstream	chr11	43854163	43854164	rs12417393
chr11	43840063	43854716	chr11_HSD17B12+:E018:upstream	chr11	43850445	43850446	rs1518821
chr11	43840063	43854716	chr11_HSD17B12+:E018:upstream	chr11	43850246	43850247	rs1518822
chr11	43840063	43854716	chr11_HSD17B12+:E018:upstream	chr11	43844743	43844744	rs1914773
chr11	43840063	43854716	chr11_HSD17B12+:E018:upstream	chr11	43843950	43843951	rs4755749
chr11	43840063	43854716	chr11_HSD17B12+:E018:upstream	chr11	43847100	43847101	rs939015
chr11	43854863	43855145	chr11_HSD17B12+:E019:upstream	chr11	43854884	43854885	rs3736505
chr11	122066433	122089104	chr11_MIR100HG-:E005:upstream	chr11	122071803	122071804	rs4936671
chr11	76784364	76791753	chr11_TSKU+:E005:upstream	chr11	76790406	76790407	rs1837680
chr11	76784364	76791753	chr11_TSKU+:E005:upstream	chr11	76784515	76784516	rs3758711
chr11	78215231	78220790	chr11_USP35+:E024:upstream	chr11	78219745	78219746	rs1318241
chr12	110345381	110346002	chr12_ATP2A2+:E021:upstream	chr12	110345435	110345436	rs1860561
chr12	69262561	69269513	chr12_CPSF6+:E014:upstream	chr12	69263364	69263365	rs317646
chr12	69262561	69269513	chr12_CPSF6+:E014:upstream	chr12	69269148	69269149	rs570256
chr12	56097939	56098501	chr12_ERBB3+:E024:upstream	chr12	56098095	56098096	rs10783779
chr12	19205442	19207267	chr12_PLEKHA5+:E014:upstream	chr12	19206551	19206552	rs7306560
chr12	110551967	110582810	chr12_PPTC7-:E009:upstream	chr12	110555985	110555986	rs4766500
chr12	110551967	110582810	chr12_PPTC7-:E009:upstream	chr12	110577315	110577316	rs1265742
chr12	69370974	69390148	chr12_YEATS4+:E009:upstream	chr12	69377292	69377293	rs315122
chr13	30463693	30464162	chr13_HMGB1-:E009:upstream	chr13	30463765	30463766	rs2249825
chr13	32688568	32694224	chr13_PDS5B+:E018:upstream	chr13	32689576	32689577	rs590383
chr13	32688568	32694224	chr13_PDS5B+:E018:upstream	chr13	32692146	32692147	rs9596075
chr13	32688568	32694224	chr13_PDS5B+:E018:upstream	chr13	32693514	32693515	rs9596076
chr14	93263992	93287629	chr14_BTBD7-:E010:upstream	chr14	93272316	93272317	rs10484032
chr14	93263992	93287629	chr14_BTBD7-:E010:upstream	chr14	93271263	93271264	rs17094891
chr14	93263992	93287629	chr14_BTBD7-:E010:upstream	chr14	93265287	93265288	rs7140710
chr14	93263992	93287629	chr14_BTBD7-:E010:upstream	chr14	93273208	93273209	rs733559
chr14	93263992	93287629	chr14_BTBD7-:E010:upstream	chr14	93273003	93273004	rs733560
chr14	93263992	93287629	chr14_BTBD7-:E010:upstream	chr14	93272529	93272530	rs740789
chr14	93263992	93287629	chr14_BTBD7-:E010:upstream	chr14	93274484	93274485	rs11621025
chr14	93263992	93287629	chr14_BTBD7-:E010:upstream	chr14	93280215	93280216	rs11628538
chr14	103687210	103700656	chr14_KLC1+:E017:upstream	chr14	103689770	103689771	rs11846404
chr14	103687210	103700656	chr14_KLC1+:E017:upstream	chr14	103693803	103693804	rs2273175
chr14	103687210	103700656	chr14_KLC1+:E017:upstream	chr14	103699415	103699416	rs861539
chr15	41661056	41668829	chr15_MGA+:E013:upstream	chr15	41661221	41661222	rs10775123
chr15	41661056	41668829	chr15_MGA+:E013:upstream	chr15	41664496	41664497	rs1899821
chr15	41661056	41668829	chr15_MGA+:E013:upstream	chr15	41665044	41665045	rs8038783
chr15	41661056	41668829	chr15_MGA+:E013:upstream	chr15	41665128	41665129	rs8039440
chr15	51893944	51896420	chr15_TMOD3+:E010:upstream	chr15	51893960	51893961	rs2959285
chr16	28826389	28826863	chr16_ATXN2L+:E009:upstream	chr16	28826751	28826752	rs12448482
chr16	28826389	28826863	chr16_ATXN2L+:E009:upstream	chr16	28826584	28826585	rs8062405
chr16	72427456	72521007	chr16_LINC01572-:E011:upstream	chr16	72498462	72498463	rs17609347
chr16	72427456	72521007	chr16_LINC01572-:E011:upstream	chr16	72492346	72492347	rs17677520
chr16	69917882	69924984	chr16_WWP2+:E023:upstream	chr16	69918753	69918754	rs4985456
chr16	69917882	69924984	chr16_WWP2+:E023:upstream	chr16	69924591	69924592	rs904808
chr17	67904839	67909583	chr17_BPTF+:E018:upstream	chr17	67906528	67906529	rs8065906
chr17	67944371	67945410	chr17_BPTF+:E031:upstream	chr17	67944610	67944611	rs6504555
chr17	67948305	67959542	chr17_BPTF+:E035:upstream	chr17	67948398	67948399	rs11870068
chr17	67948305	67959542	chr17_BPTF+:E035:upstream	chr17	67951523	67951524	rs12449442
chr17	67948305	67959542	chr17_BPTF+:E035:upstream	chr17	67955016	67955017	rs4790973
chr17	67948305	67959542	chr17_BPTF+:E035:upstream	chr17	67954990	67954991	rs4790974
chr17	67948305	67959542	chr17_BPTF+:E035:upstream	chr17	67949723	67949724	rs7223813
chr17	29703061	29705946	chr17_SSH2-:E022:upstream	chr17	29704256	29704257	rs3115088
chr17	29733886	29761151	chr17_SSH2-:E025:upstream	chr17	29734111	29734112	rs2254414
chr17	29733886	29761151	chr17_SSH2-:E025:upstream	chr17	29736256	29736257	rs2617881
chr17	29733886	29761151	chr17_SSH2-:E025:upstream	chr17	29747544	29747545	rs1038088
chr17	29733886	29761151	chr17_SSH2-:E025:upstream	chr17	29739733	29739734	rs1531553
chr17	29733886	29761151	chr17_SSH2-:E025:upstream	chr17	29746228	29746229	rs2617868
chr17	29733886	29761151	chr17_SSH2-:E025:upstream	chr17	29737479	29737480	rs2628167
chr17	29733886	29761151	chr17_SSH2-:E025:upstream	chr17	29744777	29744778	rs2628179
chr17	29733886	29761151	chr17_SSH2-:E025:upstream	chr17	29758153	29758154	rs2617874
chr1	92751057	92784255	chr1_EVI5-:E033:upstream	chr1	92765994	92765995	rs11164804
chr1	92751057	92784255	chr1_EVI5-:E033:upstream	chr1	92764146	92764147	rs3790445
chr1	92751057	92784255	chr1_EVI5-:E033:upstream	chr1	92754349	92754350	rs6604015
chr1	92751057	92784255	chr1_EVI5-:E033:upstream	chr1	92758632	92758633	rs6604018
chr1	92751057	92784255	chr1_EVI5-:E033:upstream	chr1	92761626	92761627	rs6604022
chr1	92751057	92784255	chr1_EVI5-:E033:upstream	chr1	92762508	92762509	rs6696636
chr1	92751057	92784255	chr1_EVI5-:E033:upstream	chr1	92769942	92769943	rs11164808
chr1	92751057	92784255	chr1_EVI5-:E033:upstream	chr1	92774846	92774847	rs7513815
chr1	92751057	92784255	chr1_EVI5-:E033:upstream	chr1	92769521	92769522	rs7543327
chr1	92751057	92784255	chr1_EVI5-:E033:upstream	chr1	92782670	92782671	rs6685705
chr1	111727803	111736347	chr1_INKA2-:E002:upstream	chr1	111734974	111734975	rs1000947
chr1	111727803	111736347	chr1_INKA2-:E002:upstream	chr1	111730403	111730404	rs2076586
chr1	39084437	39105380	chr1_MACF1+:E007:upstream	chr1	39103898	39103899	rs2282231
chr1	39159019	39204303	chr1_MACF1+:E009:upstream	chr1	39174071	39174072	rs1126313
chr1	39159019	39204303	chr1_MACF1+:E009:upstream	chr1	39173980	39173981	rs1537817
chr1	39159019	39204303	chr1_MACF1+:E009:upstream	chr1	39177709	39177710	rs16825887
chr1	39159019	39204303	chr1_MACF1+:E009:upstream	chr1	39196835	39196836	rs16825939
chr1	39282373	39283190	chr1_MACF1+:E021:upstream	chr1	39282598	39282599	rs3818806
chr1	39292842	39293459	chr1_MACF1+:E031:upstream	chr1	39292961	39292962	rs16826038
chr1	39388657	39422375	chr1_MACF1+:E075:upstream	chr1	39414646	39414647	rs3768302
chr1	39429325	39429828	chr1_MACF1+:E081:upstream	chr1	39429608	39429609	rs682571
chr1	39430907	39432536	chr1_MACF1+:E083:upstream	chr1	39431598	39431599	rs599823
chr1	39439499	39441004	chr1_MACF1+:E090:upstream	chr1	39439915	39439916	rs2018212
chr1	39444834	39447433	chr1_MACF1+:E098:upstream	chr1	39445011	39445012	rs617577
chr1	39447586	39447693	chr1_MACF1+:E099:upstream	chr1	39447678	39447679	rs2296173
chr1	11134465	11139305	chr1_MTOR-:E024:upstream	chr1	11137409	11137410	rs12097293
chr1	11134465	11139305	chr1_MTOR-:E024:upstream	chr1	11138444	11138445	rs6701524
chr1	107436798	107480612	chr1_NTNG1+:E019:upstream	chr1	107440369	107440370	rs11185115
chr1	107436798	107480612	chr1_NTNG1+:E019:upstream	chr1	107440165	107440166	rs12095462
chr1	107436798	107480612	chr1_NTNG1+:E019:upstream	chr1	107458684	107458685	rs11802147
chr1	107436798	107480612	chr1_NTNG1+:E019:upstream	chr1	107446691	107446692	rs11803905
chr1	107436798	107480612	chr1_NTNG1+:E019:upstream	chr1	107446925	107446926	rs11803941
chr1	107436798	107480612	chr1_NTNG1+:E019:upstream	chr1	107447591	107447592	rs1444041
chr1	107436798	107480612	chr1_NTNG1+:E019:upstream	chr1	107459737	107459738	rs4914945
chr1	107436798	107480612	chr1_NTNG1+:E019:upstream	chr1	107449085	107449086	rs501332
chr1	107436798	107480612	chr1_NTNG1+:E019:upstream	chr1	107463230	107463231	rs977799
chr1	62128093	62128842	chr1_PATJ+:E054:upstream	chr1	62128220	62128221	rs2481664
chr1	8624379	8655974	chr1_RERE-:E025:upstream	chr1	8630873	8630874	rs1381928
chr1	8624379	8655974	chr1_RERE-:E025:upstream	chr1	8648469	8648470	rs11121210
chr1	8624379	8655974	chr1_RERE-:E025:upstream	chr1	8641171	8641172	rs1463052
chr1	8624379	8655974	chr1_RERE-:E025:upstream	chr1	8644977	8644978	rs1463053
chr1	8624379	8655974	chr1_RERE-:E025:upstream	chr1	8643999	8644000	rs2401138
chr1	8624379	8655974	chr1_RERE-:E025:upstream	chr1	8642693	8642694	rs6577513
chr1	8624379	8655974	chr1_RERE-:E025:upstream	chr1	8638217	8638218	rs7520025
chr1	92324374	92333392	chr1_RPAP2+:E010:upstream	chr1	92332256	92332257	rs6604091
chr1	92324374	92333392	chr1_RPAP2+:E010:upstream	chr1	92326254	92326255	rs6668685
chr1	92324374	92333392	chr1_RPAP2+:E010:upstream	chr1	92332473	92332474	rs7542747
chr1	205801059	205810071	chr1_SLC41A1-:E011:upstream	chr1	205805710	205805711	rs823074
chr1	205801059	205810071	chr1_SLC41A1-:E011:upstream	chr1	205805768	205805769	rs823075
chr1	77641654	77682586	chr1_ZZZ3-:E020:upstream	chr1	77642188	77642189	rs278839
chr1	77641654	77682586	chr1_ZZZ3-:E020:upstream	chr1	77664557	77664558	rs278853
chr2	235908905	235909079	chr2_AGAP1+:E025:upstream	chr2	235908984	235908985	rs4663215
chr2	202954133	202955675	chr2_CARF+:E025:upstream	chr2	202955551	202955552	rs3731695
chr2	28752175	28776852	chr2_PPP1CB+:E004:upstream	chr2	28759163	28759164	rs6547874
chr2	28752175	28776852	chr2_PPP1CB+:E004:upstream	chr2	28765216	28765217	rs6707848
chr2	28752175	28776852	chr2_PPP1CB+:E004:upstream	chr2	28772359	28772360	rs10183665
chr2	28752175	28776852	chr2_PPP1CB+:E004:upstream	chr2	28773428	28773429	rs7579277
chr2	28752175	28776852	chr2_PPP1CB+:E004:upstream	chr2	28774134	28774135	rs7580078
chr2	86612273	86616418	chr2_RNF103-:E004:upstream	chr2	86614755	86614756	rs218060
chr2	86612273	86616418	chr2_RNF103-:E004:upstream	chr2	86614651	86614652	rs308907
chr2	55010333	55025087	chr2_RTN4-:E008:upstream	chr2	55011619	55011620	rs10189094
chr2	55010333	55025087	chr2_RTN4-:E008:upstream	chr2	55017401	55017402	rs17046594
chr2	55010333	55025087	chr2_RTN4-:E008:upstream	chr2	55011540	55011541	rs3806572
chr2	55010333	55025087	chr2_RTN4-:E008:upstream	chr2	55020120	55020121	rs12475787
chr2	55010333	55025087	chr2_RTN4-:E008:upstream	chr2	55024237	55024238	rs7601625
chr2	36787275	36801302	chr2_VIT+:E017:upstream	chr2	36793946	36793947	rs11677279
chr2	36787275	36801302	chr2_VIT+:E017:upstream	chr2	36797569	36797570	rs12987048
chr2	36787275	36801302	chr2_VIT+:E017:upstream	chr2	36795900	36795901	rs4670169
chr3	195289230	195291707	chr3_ACAP2-:E007:upstream	chr3	195291165	195291166	rs9840346
chr3	15766311	15781436	chr3_ANKRD28-:E035:upstream	chr3	15767164	15767165	rs12491914
chr3	15766311	15781436	chr3_ANKRD28-:E035:upstream	chr3	15774818	15774819	rs7633542
chr3	15766311	15781436	chr3_ANKRD28-:E035:upstream	chr3	15779613	15779614	rs11712568
chr3	136928226	136930476	chr3_NCK1+:E005:upstream	chr3	136928403	136928404	rs3772388
chr3	136928226	136930476	chr3_NCK1+:E005:upstream	chr3	136928964	136928965	rs3856623
chr3	173398486	173408893	chr3_NLGN1+:E008:upstream	chr3	173404701	173404702	rs472103
chr3	173398486	173408893	chr3_NLGN1+:E008:upstream	chr3	173401587	173401588	rs488029
chr3	173398486	173408893	chr3_NLGN1+:E008:upstream	chr3	173402312	173402313	rs536445
chr3	94095153	94126212	chr3_NSUN3+:E007:upstream	chr3	94099621	94099622	rs2965
chr3	94095153	94126212	chr3_NSUN3+:E007:upstream	chr3	94112443	94112444	rs13076476
chr3	94095153	94126212	chr3_NSUN3+:E007:upstream	chr3	94124838	94124839	rs9860972
chr3	62078257	62132603	chr3_PTPRG+:E010:upstream	chr3	62120804	62120805	rs11917047
chr3	62078257	62132603	chr3_PTPRG+:E010:upstream	chr3	62115165	62115166	rs1911746
chr3	62078257	62132603	chr3_PTPRG+:E010:upstream	chr3	62125799	62125800	rs6798094
chr3	158123990	158203073	chr3_RSRC1+:E008:upstream	chr3	158128391	158128392	rs12485440
chr3	158123990	158203073	chr3_RSRC1+:E008:upstream	chr3	158132420	158132421	rs13061378
chr3	158123990	158203073	chr3_RSRC1+:E008:upstream	chr3	158138356	158138357	rs1589526
chr3	158123990	158203073	chr3_RSRC1+:E008:upstream	chr3	158132657	158132658	rs1609525
chr3	158123990	158203073	chr3_RSRC1+:E008:upstream	chr3	158126268	158126269	rs4431056
chr3	158123990	158203073	chr3_RSRC1+:E008:upstream	chr3	158129013	158129014	rs4680411
chr3	158123990	158203073	chr3_RSRC1+:E008:upstream	chr3	158131293	158131294	rs4680412
chr3	158123990	158203073	chr3_RSRC1+:E008:upstream	chr3	158128020	158128021	rs7614572
chr3	158123990	158203073	chr3_RSRC1+:E008:upstream	chr3	158135988	158135989	rs7622971
chr3	158123990	158203073	chr3_RSRC1+:E008:upstream	chr3	158128350	158128351	rs7647342
chr3	158123990	158203073	chr3_RSRC1+:E008:upstream	chr3	158130419	158130420	rs9290021
chr3	158123990	158203073	chr3_RSRC1+:E008:upstream	chr3	158129164	158129165	rs9814942
chr3	158123990	158203073	chr3_RSRC1+:E008:upstream	chr3	158127379	158127380	rs9860241
chr3	158123990	158203073	chr3_RSRC1+:E008:upstream	chr3	158131095	158131096	rs9881063
chr3	158123990	158203073	chr3_RSRC1+:E008:upstream	chr3	158153303	158153304	rs11706229
chr3	158123990	158203073	chr3_RSRC1+:E008:upstream	chr3	158141715	158141716	rs1609524
chr3	158123990	158203073	chr3_RSRC1+:E008:upstream	chr3	158149845	158149846	rs4271876
chr3	158123990	158203073	chr3_RSRC1+:E008:upstream	chr3	158138631	158138632	rs4318510
chr3	158123990	158203073	chr3_RSRC1+:E008:upstream	chr3	158141379	158141380	rs4679821
chr3	158123990	158203073	chr3_RSRC1+:E008:upstream	chr3	158140071	158140072	rs6777853
chr3	158123990	158203073	chr3_RSRC1+:E008:upstream	chr3	158152631	158152632	rs7623107
chr3	158123990	158203073	chr3_RSRC1+:E008:upstream	chr3	158152837	158152838	rs7642751
chr3	158123990	158203073	chr3_RSRC1+:E008:upstream	chr3	158152661	158152662	rs7645475
chr3	158123990	158203073	chr3_RSRC1+:E008:upstream	chr3	158148755	158148756	rs9840667
chr3	158123990	158203073	chr3_RSRC1+:E008:upstream	chr3	158138547	158138548	rs9852745
chr3	158123990	158203073	chr3_RSRC1+:E008:upstream	chr3	158167492	158167493	rs13060100
chr3	158123990	158203073	chr3_RSRC1+:E008:upstream	chr3	158170015	158170016	rs13072413
chr3	158123990	158203073	chr3_RSRC1+:E008:upstream	chr3	158159817	158159818	rs13086348
chr3	158123990	158203073	chr3_RSRC1+:E008:upstream	chr3	158166626	158166627	rs1610269
chr3	158123990	158203073	chr3_RSRC1+:E008:upstream	chr3	158159426	158159427	rs4261833
chr3	158123990	158203073	chr3_RSRC1+:E008:upstream	chr3	158159308	158159309	rs4558712
chr3	158123990	158203073	chr3_RSRC1+:E008:upstream	chr3	158155161	158155162	rs6768496
chr3	158123990	158203073	chr3_RSRC1+:E008:upstream	chr3	158170648	158170649	rs6802443
chr3	158123990	158203073	chr3_RSRC1+:E008:upstream	chr3	158171112	158171113	rs7626909
chr3	158123990	158203073	chr3_RSRC1+:E008:upstream	chr3	158162480	158162481	rs9811346
chr3	158123990	158203073	chr3_RSRC1+:E008:upstream	chr3	158162607	158162608	rs9848977
chr3	158123990	158203073	chr3_RSRC1+:E008:upstream	chr3	158169482	158169483	rs9857883
chr3	158123990	158203073	chr3_RSRC1+:E008:upstream	chr3	158174397	158174398	rs1581412
chr3	158123990	158203073	chr3_RSRC1+:E008:upstream	chr3	158179479	158179480	rs1608968
chr3	158123990	158203073	chr3_RSRC1+:E008:upstream	chr3	158181937	158181938	rs1724727
chr3	158123990	158203073	chr3_RSRC1+:E008:upstream	chr3	158181373	158181374	rs1724728
chr3	158123990	158203073	chr3_RSRC1+:E008:upstream	chr3	158181326	158181327	rs1724729
chr3	158123990	158203073	chr3_RSRC1+:E008:upstream	chr3	158186921	158186922	rs1730032
chr3	158123990	158203073	chr3_RSRC1+:E008:upstream	chr3	158186610	158186611	rs1915935
chr3	158123990	158203073	chr3_RSRC1+:E008:upstream	chr3	158185185	158185186	rs2693546
chr3	158123990	158203073	chr3_RSRC1+:E008:upstream	chr3	158171985	158171986	rs4679822
chr3	158123990	158203073	chr3_RSRC1+:E008:upstream	chr3	158175653	158175654	rs7645383
chr3	158123990	158203073	chr3_RSRC1+:E008:upstream	chr3	158187434	158187435	rs827161
chr3	158123990	158203073	chr3_RSRC1+:E008:upstream	chr3	158198829	158198830	rs13059066
chr3	158123990	158203073	chr3_RSRC1+:E008:upstream	chr3	158193945	158193946	rs827149
chr3	158123990	158203073	chr3_RSRC1+:E008:upstream	chr3	158193746	158193747	rs827150
chr3	158123990	158203073	chr3_RSRC1+:E008:upstream	chr3	158191207	158191208	rs827153
chr3	158123990	158203073	chr3_RSRC1+:E008:upstream	chr3	158189922	158189923	rs827154
chr3	158123990	158203073	chr3_RSRC1+:E008:upstream	chr3	158189329	158189330	rs827155
chr3	158123990	158203073	chr3_RSRC1+:E008:upstream	chr3	158189167	158189168	rs827156
chr3	158123990	158203073	chr3_RSRC1+:E008:upstream	chr3	158187845	158187846	rs827160
chr3	158123990	158203073	chr3_RSRC1+:E008:upstream	chr3	158201978	158201979	rs827805
chr3	158123990	158203073	chr3_RSRC1+:E008:upstream	chr3	158190275	158190276	rs862352
chr3	158123990	158203073	chr3_RSRC1+:E008:upstream	chr3	158190557	158190558	rs864331
chr3	141438364	141442390	chr3_ZBTB38+:E027:upstream	chr3	141441528	141441529	rs4683404
chr3	141438364	141442390	chr3_ZBTB38+:E027:upstream	chr3	141442039	141442040	rs7626871
chr4	145125100	145127527	chr4_ABCE1+:E020:upstream	chr4	145127401	145127402	rs4148234
chr4	79907466	79976192	chr4_ANTXR2-:E003:upstream	chr4	79907966	79907967	rs6534642
chr4	30786785	30920154	chr4_PCDH7+:E007:upstream	chr4	30790267	30790268	rs10006361
chr4	30786785	30920154	chr4_PCDH7+:E007:upstream	chr4	30830696	30830697	rs12331633
chr4	30786785	30920154	chr4_PCDH7+:E007:upstream	chr4	30826182	30826183	rs4619848
chr4	30786785	30920154	chr4_PCDH7+:E007:upstream	chr4	30831581	30831582	rs7692210
chr4	30786785	30920154	chr4_PCDH7+:E007:upstream	chr4	30841910	30841911	rs1345148
chr4	30786785	30920154	chr4_PCDH7+:E007:upstream	chr4	30844044	30844045	rs6816969
chr4	30786785	30920154	chr4_PCDH7+:E007:upstream	chr4	30838708	30838709	rs7656673
chr4	146412148	146441666	chr4_SLC10A7-:E018:upstream	chr4	146423701	146423702	rs2358268
chr4	146412148	146441666	chr4_SLC10A7-:E018:upstream	chr4	146416356	146416357	rs2679156
chr4	146412148	146441666	chr4_SLC10A7-:E018:upstream	chr4	146415503	146415504	rs2679157
chr4	146412148	146441666	chr4_SLC10A7-:E018:upstream	chr4	146415293	146415294	rs2679158
chr4	146412148	146441666	chr4_SLC10A7-:E018:upstream	chr4	146413446	146413447	rs2679161
chr4	146412148	146441666	chr4_SLC10A7-:E018:upstream	chr4	146425751	146425752	rs4835036
chr4	146412148	146441666	chr4_SLC10A7-:E018:upstream	chr4	146425345	146425346	rs4835306
chr5	158942881	159052780	chr5_EBF1-:E023:upstream	chr5	158977120	158977121	rs2161356
chr5	158942881	159052780	chr5_EBF1-:E023:upstream	chr5	159003866	159003867	rs869593
chr6	108562142	108567991	chr6_FOXO3+:E006:upstream	chr6	108564419	108564420	rs1536057
chr6	108562142	108567991	chr6_FOXO3+:E006:upstream	chr6	108567389	108567390	rs2253310
chr6	108569741	108585154	chr6_FOXO3+:E007:upstream	chr6	108574182	108574183	rs2490272
chr6	108569741	108585154	chr6_FOXO3+:E007:upstream	chr6	108575011	108575012	rs2802288
chr6	108569741	108585154	chr6_FOXO3+:E007:upstream	chr6	108584996	108584997	rs12206094
chr6	108569741	108585154	chr6_FOXO3+:E007:upstream	chr6	108584476	108584477	rs2802290
chr6	108589814	108639494	chr6_FOXO3+:E008:upstream	chr6	108617879	108617880	rs12202234
chr6	108589814	108639494	chr6_FOXO3+:E008:upstream	chr6	108620189	108620190	rs17598747
chr6	108589814	108639494	chr6_FOXO3+:E008:upstream	chr6	108624166	108624167	rs2022464
chr6	108589814	108639494	chr6_FOXO3+:E008:upstream	chr6	108613257	108613258	rs2764264
chr6	108589814	108639494	chr6_FOXO3+:E008:upstream	chr6	108638821	108638822	rs12202209
chr6	108589814	108639494	chr6_FOXO3+:E008:upstream	chr6	108636326	108636327	rs17310529
chr6	108656537	108663456	chr6_FOXO3+:E012:upstream	chr6	108662863	108662864	rs12196996
chr6	108656537	108663456	chr6_FOXO3+:E012:upstream	chr6	108659992	108659993	rs12212067
chr6	108656537	108663456	chr6_FOXO3+:E012:upstream	chr6	108662323	108662324	rs9398171
chr6	26159201	26170976	chr6_HIST1H2BD+:E005:upstream	chr6	26168674	26168675	rs2066295
chr6	26159201	26170976	chr6_HIST1H2BD+:E005:upstream	chr6	26167481	26167482	rs4486004
chr6	26159201	26170976	chr6_HIST1H2BD+:E005:upstream	chr6	26167384	26167385	rs9366639
chr6	63443757	63565503	chr6_LGSN-:E019:upstream	chr6	63451827	63451828	rs7742595
chr6	63443757	63565503	chr6_LGSN-:E019:upstream	chr6	63449158	63449159	rs9361779
chr6	63443757	63565503	chr6_LGSN-:E019:upstream	chr6	63453047	63453048	rs9449291
chr6	63443757	63565503	chr6_LGSN-:E019:upstream	chr6	63464653	63464654	rs2250179
chr6	63443757	63565503	chr6_LGSN-:E019:upstream	chr6	63464034	63464035	rs6924479
chr6	63443757	63565503	chr6_LGSN-:E019:upstream	chr6	63466541	63466542	rs6942342
chr6	63443757	63565503	chr6_LGSN-:E019:upstream	chr6	63459628	63459629	rs9449312
chr6	63443757	63565503	chr6_LGSN-:E019:upstream	chr6	63475010	63475011	rs11759194
chr6	63443757	63565503	chr6_LGSN-:E019:upstream	chr6	63475058	63475059	rs12213364
chr6	63443757	63565503	chr6_LGSN-:E019:upstream	chr6	63484878	63484879	rs2146149
chr6	63443757	63565503	chr6_LGSN-:E019:upstream	chr6	63484956	63484957	rs2146150
chr6	63443757	63565503	chr6_LGSN-:E019:upstream	chr6	63480372	63480373	rs2622276
chr6	63443757	63565503	chr6_LGSN-:E019:upstream	chr6	63483201	63483202	rs2758259
chr6	63443757	63565503	chr6_LGSN-:E019:upstream	chr6	63480540	63480541	rs4299811
chr6	63443757	63565503	chr6_LGSN-:E019:upstream	chr6	63481224	63481225	rs4482958
chr6	63443757	63565503	chr6_LGSN-:E019:upstream	chr6	63478773	63478774	rs6938965
chr6	63443757	63565503	chr6_LGSN-:E019:upstream	chr6	63478522	63478523	rs9294234
chr6	63443757	63565503	chr6_LGSN-:E019:upstream	chr6	63475213	63475214	rs9361838
chr6	63443757	63565503	chr6_LGSN-:E019:upstream	chr6	63496382	63496383	rs1570315
chr6	63443757	63565503	chr6_LGSN-:E019:upstream	chr6	63493669	63493670	rs1612517
chr6	63443757	63565503	chr6_LGSN-:E019:upstream	chr6	63498306	63498307	rs1630182
chr6	63443757	63565503	chr6_LGSN-:E019:upstream	chr6	63494453	63494454	rs1744133
chr6	63443757	63565503	chr6_LGSN-:E019:upstream	chr6	63494942	63494943	rs1744135
chr6	63443757	63565503	chr6_LGSN-:E019:upstream	chr6	63502925	63502926	rs1744140
chr6	63443757	63565503	chr6_LGSN-:E019:upstream	chr6	63488144	63488145	rs1744152
chr6	63443757	63565503	chr6_LGSN-:E019:upstream	chr6	63499320	63499321	rs1779769
chr6	63443757	63565503	chr6_LGSN-:E019:upstream	chr6	63499654	63499655	rs1779771
chr6	63443757	63565503	chr6_LGSN-:E019:upstream	chr6	63489672	63489673	rs2622281
chr6	63443757	63565503	chr6_LGSN-:E019:upstream	chr6	63503959	63503960	rs2622298
chr6	63443757	63565503	chr6_LGSN-:E019:upstream	chr6	63492306	63492307	rs2758224
chr6	63443757	63565503	chr6_LGSN-:E019:upstream	chr6	63492713	63492714	rs2758225
chr6	63443757	63565503	chr6_LGSN-:E019:upstream	chr6	63493071	63493072	rs2758226
chr6	63443757	63565503	chr6_LGSN-:E019:upstream	chr6	63497710	63497711	rs2800048
chr6	63443757	63565503	chr6_LGSN-:E019:upstream	chr6	63492783	63492784	rs2800049
chr6	63443757	63565503	chr6_LGSN-:E019:upstream	chr6	63517499	63517500	rs1197897
chr6	63443757	63565503	chr6_LGSN-:E019:upstream	chr6	63513473	63513474	rs1620671
chr6	63443757	63565503	chr6_LGSN-:E019:upstream	chr6	63507003	63507004	rs1681946
chr6	63443757	63565503	chr6_LGSN-:E019:upstream	chr6	63507534	63507535	rs1681947
chr6	63443757	63565503	chr6_LGSN-:E019:upstream	chr6	63513239	63513240	rs1681957
chr6	63443757	63565503	chr6_LGSN-:E019:upstream	chr6	63511963	63511964	rs1744146
chr6	63443757	63565503	chr6_LGSN-:E019:upstream	chr6	63513107	63513108	rs1744147
chr6	63443757	63565503	chr6_LGSN-:E019:upstream	chr6	63508391	63508392	rs2758237
chr6	63443757	63565503	chr6_LGSN-:E019:upstream	chr6	63505257	63505258	rs2984458
chr6	63443757	63565503	chr6_LGSN-:E019:upstream	chr6	63527909	63527910	rs1197902
chr6	63443757	63565503	chr6_LGSN-:E019:upstream	chr6	63525100	63525101	rs1197905
chr6	63443757	63565503	chr6_LGSN-:E019:upstream	chr6	63529499	63529500	rs1681942
chr6	63443757	63565503	chr6_LGSN-:E019:upstream	chr6	63530610	63530611	rs2622274
chr6	63443757	63565503	chr6_LGSN-:E019:upstream	chr6	63544081	63544082	rs1322415
chr6	63443757	63565503	chr6_LGSN-:E019:upstream	chr6	63544113	63544114	rs1322416
chr6	46325891	46456753	chr6_RCAN2-:E006:upstream	chr6	46334710	46334711	rs11963572
chr6	46325891	46456753	chr6_RCAN2-:E006:upstream	chr6	46338610	46338611	rs12055643
chr6	46325891	46456753	chr6_RCAN2-:E006:upstream	chr6	46340698	46340699	rs12055715
chr6	46325891	46456753	chr6_RCAN2-:E006:upstream	chr6	46338651	46338652	rs12055793
chr6	46325891	46456753	chr6_RCAN2-:E006:upstream	chr6	46339189	46339190	rs1345058
chr6	46325891	46456753	chr6_RCAN2-:E006:upstream	chr6	46337716	46337717	rs1372568
chr6	46325891	46456753	chr6_RCAN2-:E006:upstream	chr6	46337804	46337805	rs1372569
chr6	46325891	46456753	chr6_RCAN2-:E006:upstream	chr6	46342909	46342910	rs4481428
chr6	46325891	46456753	chr6_RCAN2-:E006:upstream	chr6	46338001	46338002	rs4711849
chr6	46325891	46456753	chr6_RCAN2-:E006:upstream	chr6	46336264	46336265	rs4714923
chr6	46325891	46456753	chr6_RCAN2-:E006:upstream	chr6	46336277	46336278	rs4714924
chr6	46325891	46456753	chr6_RCAN2-:E006:upstream	chr6	46336456	46336457	rs4714925
chr6	46325891	46456753	chr6_RCAN2-:E006:upstream	chr6	46336507	46336508	rs4714926
chr6	46325891	46456753	chr6_RCAN2-:E006:upstream	chr6	46342202	46342203	rs4714929
chr6	46325891	46456753	chr6_RCAN2-:E006:upstream	chr6	46339599	46339600	rs6910610
chr6	46325891	46456753	chr6_RCAN2-:E006:upstream	chr6	46339890	46339891	rs6911147
chr6	46325891	46456753	chr6_RCAN2-:E006:upstream	chr6	46349004	46349005	rs6934171
chr6	46325891	46456753	chr6_RCAN2-:E006:upstream	chr6	46337207	46337208	rs6940825
chr6	46325891	46456753	chr6_RCAN2-:E006:upstream	chr6	46340204	46340205	rs716493
chr6	46325891	46456753	chr6_RCAN2-:E006:upstream	chr6	46347453	46347454	rs9296490
chr6	46325891	46456753	chr6_RCAN2-:E006:upstream	chr6	46347547	46347548	rs9296491
chr6	46325891	46456753	chr6_RCAN2-:E006:upstream	chr6	46347835	46347836	rs9296492
chr6	46325891	46456753	chr6_RCAN2-:E006:upstream	chr6	46336919	46336920	rs935106
chr6	46325891	46456753	chr6_RCAN2-:E006:upstream	chr6	46345137	46345138	rs9367242
chr6	46325891	46456753	chr6_RCAN2-:E006:upstream	chr6	46345511	46345512	rs9369611
chr6	46325891	46456753	chr6_RCAN2-:E006:upstream	chr6	46341040	46341041	rs9381440
chr6	46325891	46456753	chr6_RCAN2-:E006:upstream	chr6	46345807	46345808	rs9381442
chr6	46325891	46456753	chr6_RCAN2-:E006:upstream	chr6	46348829	46348830	rs9381443
chr6	46325891	46456753	chr6_RCAN2-:E006:upstream	chr6	46348952	46348953	rs9381444
chr6	46325891	46456753	chr6_RCAN2-:E006:upstream	chr6	46343755	46343756	rs9395173
chr6	46325891	46456753	chr6_RCAN2-:E006:upstream	chr6	46345362	46345363	rs9395174
chr6	46325891	46456753	chr6_RCAN2-:E006:upstream	chr6	46347599	46347600	rs9395175
chr6	46325891	46456753	chr6_RCAN2-:E006:upstream	chr6	46356918	46356919	rs1104943
chr6	46325891	46456753	chr6_RCAN2-:E006:upstream	chr6	46350830	46350831	rs11963889
chr6	46325891	46456753	chr6_RCAN2-:E006:upstream	chr6	46354672	46354673	rs1837898
chr6	46325891	46456753	chr6_RCAN2-:E006:upstream	chr6	46353351	46353352	rs1867015
chr6	46325891	46456753	chr6_RCAN2-:E006:upstream	chr6	46351540	46351541	rs2396642
chr6	46325891	46456753	chr6_RCAN2-:E006:upstream	chr6	46362555	46362556	rs4501427
chr6	46325891	46456753	chr6_RCAN2-:E006:upstream	chr6	46362331	46362332	rs9381445
chr6	46325891	46456753	chr6_RCAN2-:E006:upstream	chr6	46361203	46361204	rs9395179
chr6	46325891	46456753	chr6_RCAN2-:E006:upstream	chr6	46381096	46381097	rs6903387
chr6	46325891	46456753	chr6_RCAN2-:E006:upstream	chr6	46367431	46367432	rs9357506
chr6	46325891	46456753	chr6_RCAN2-:E006:upstream	chr6	46374824	46374825	rs9381446
chr6	46325891	46456753	chr6_RCAN2-:E006:upstream	chr6	46378525	46378526	rs9395183
chr6	46325891	46456753	chr6_RCAN2-:E006:upstream	chr6	46395819	46395820	rs10498767
chr6	46325891	46456753	chr6_RCAN2-:E006:upstream	chr6	46393671	46393672	rs6458501
chr6	46325891	46456753	chr6_RCAN2-:E006:upstream	chr6	46392559	46392560	rs9369616
chr6	46325891	46456753	chr6_RCAN2-:E006:upstream	chr6	46390517	46390518	rs9381447
chr6	46325891	46456753	chr6_RCAN2-:E006:upstream	chr6	46383783	46383784	rs9395184
chr6	46325891	46456753	chr6_RCAN2-:E006:upstream	chr6	46394340	46394341	rs953887
chr6	46325891	46456753	chr6_RCAN2-:E006:upstream	chr6	46400124	46400125	rs13199106
chr6	46325891	46456753	chr6_RCAN2-:E006:upstream	chr6	46407588	46407589	rs2153615
chr6	46325891	46456753	chr6_RCAN2-:E006:upstream	chr6	46410523	46410524	rs3934393
chr6	46325891	46456753	chr6_RCAN2-:E006:upstream	chr6	46411948	46411949	rs4327691
chr6	46325891	46456753	chr6_RCAN2-:E006:upstream	chr6	46411404	46411405	rs4383813
chr6	46325891	46456753	chr6_RCAN2-:E006:upstream	chr6	46414466	46414467	rs9395189
chr6	46325891	46456753	chr6_RCAN2-:E006:upstream	chr6	46423167	46423168	rs1534363
chr6	46325891	46456753	chr6_RCAN2-:E006:upstream	chr6	46423086	46423087	rs1534364
chr6	46325891	46456753	chr6_RCAN2-:E006:upstream	chr6	46430266	46430267	rs1554790
chr6	46325891	46456753	chr6_RCAN2-:E006:upstream	chr6	46419291	46419292	rs9349358
chr6	46325891	46456753	chr6_RCAN2-:E006:upstream	chr6	46431565	46431566	rs9357507
chr6	46325891	46456753	chr6_RCAN2-:E006:upstream	chr6	46439999	46440000	rs4714933
chr6	46325891	46456753	chr6_RCAN2-:E006:upstream	chr6	46442451	46442452	rs6458505
chr6	46325891	46456753	chr6_RCAN2-:E006:upstream	chr6	46435330	46435331	rs9349359
chr6	46325891	46456753	chr6_RCAN2-:E006:upstream	chr6	46438704	46438705	rs9349360
chr6	46325891	46456753	chr6_RCAN2-:E006:upstream	chr6	46443539	46443540	rs9357508
chr6	46325891	46456753	chr6_RCAN2-:E006:upstream	chr6	46435363	46435364	rs9367246
chr6	46325891	46456753	chr6_RCAN2-:E006:upstream	chr6	46433432	46433433	rs9381450
chr6	46325891	46456753	chr6_RCAN2-:E006:upstream	chr6	46435119	46435120	rs9395193
chr7	99439184	99439377	chr7_CPSF4+:E007:upstream	chr7	99439296	99439297	rs10215854
chr7	74717065	74718880	chr7_GTF2I+:E014:upstream	chr7	74717694	74717695	rs17515241
chr7	114923664	114942276	chr7_MDFIC+:E004:upstream	chr7	114929546	114929547	rs7777591
chr7	114923664	114942276	chr7_MDFIC+:E004:upstream	chr7	114939979	114939980	rs4595064
chr7	114942396	114979507	chr7_MDFIC+:E005:upstream	chr7	114945613	114945614	rs10259595
chr7	114942396	114979507	chr7_MDFIC+:E005:upstream	chr7	114948484	114948485	rs4344019
chr7	114942396	114979507	chr7_MDFIC+:E005:upstream	chr7	114943701	114943702	rs4551278
chr7	114942396	114979507	chr7_MDFIC+:E005:upstream	chr7	114946819	114946820	rs4557633
chr7	114942396	114979507	chr7_MDFIC+:E005:upstream	chr7	114943042	114943043	rs4609131
chr7	114942396	114979507	chr7_MDFIC+:E005:upstream	chr7	114947369	114947370	rs4727808
chr7	114942396	114979507	chr7_MDFIC+:E005:upstream	chr7	114950172	114950173	rs10247983
chr8	115587603	115603874	chr8_TRPS1-:E005:upstream	chr8	115588843	115588844	rs10808475
chr8	115587603	115603874	chr8_TRPS1-:E005:upstream	chr8	115588794	115588795	rs6998144
chr8	115587603	115603874	chr8_TRPS1-:E005:upstream	chr8	115588557	115588558	rs7012216
chr8	115587603	115603874	chr8_TRPS1-:E005:upstream	chr8	115590627	115590628	rs10505258
chr8	115587603	115603874	chr8_TRPS1-:E005:upstream	chr8	115590231	115590232	rs12679749
chr8	115587603	115603874	chr8_TRPS1-:E005:upstream	chr8	115590646	115590647	rs13275142
chr8	115587603	115603874	chr8_TRPS1-:E005:upstream	chr8	115590875	115590876	rs2721954
chr8	115587603	115603874	chr8_TRPS1-:E005:upstream	chr8	115590775	115590776	rs2737203
chr8	115587603	115603874	chr8_TRPS1-:E005:upstream	chr8	115589174	115589175	rs7357472
chr8	115605001	115619133	chr8_TRPS1-:E006:upstream	chr8	115610678	115610679	rs2245019
chr8	115605001	115619133	chr8_TRPS1-:E006:upstream	chr8	115608076	115608077	rs2721932
chr8	115605001	115619133	chr8_TRPS1-:E006:upstream	chr8	115619050	115619051	rs2737218
chr9	16705141	16727798	chr9_BNC2-:E024:upstream	chr9	16715658	16715659	rs10481558
chr9	16705141	16727798	chr9_BNC2-:E024:upstream	chr9	16713667	16713668	rs10738451
chr9	16705141	16727798	chr9_BNC2-:E024:upstream	chr9	16717274	16717275	rs10738452
chr9	16705141	16727798	chr9_BNC2-:E024:upstream	chr9	16718437	16718438	rs10756788
chr9	16705141	16727798	chr9_BNC2-:E024:upstream	chr9	16720123	16720124	rs10756789
chr9	16705141	16727798	chr9_BNC2-:E024:upstream	chr9	16720199	16720200	rs10756790
chr9	16705141	16727798	chr9_BNC2-:E024:upstream	chr9	16724456	16724457	rs10756791
chr9	16705141	16727798	chr9_BNC2-:E024:upstream	chr9	16722305	16722306	rs10810597
chr9	16705141	16727798	chr9_BNC2-:E024:upstream	chr9	16719446	16719447	rs10962549
chr9	16705141	16727798	chr9_BNC2-:E024:upstream	chr9	16720330	16720331	rs10962550
chr9	16705141	16727798	chr9_BNC2-:E024:upstream	chr9	16715827	16715828	rs1330303
chr9	16705141	16727798	chr9_BNC2-:E024:upstream	chr9	16714630	16714631	rs1330304
chr9	15623412	15657128	chr9_CCDC171+:E023:upstream	chr9	15623645	15623646	rs10756679
chr9	15623412	15657128	chr9_CCDC171+:E023:upstream	chr9	15623962	15623963	rs4741519
chr9	15623412	15657128	chr9_CCDC171+:E023:upstream	chr9	15625264	15625265	rs7389629
chr9	15623412	15657128	chr9_CCDC171+:E023:upstream	chr9	15634647	15634648	rs10756686
chr9	15623412	15657128	chr9_CCDC171+:E023:upstream	chr9	15642192	15642193	rs10756687
chr9	15623412	15657128	chr9_CCDC171+:E023:upstream	chr9	15638472	15638473	rs10810416
chr9	15623412	15657128	chr9_CCDC171+:E023:upstream	chr9	15642910	15642911	rs10810419
chr9	15623412	15657128	chr9_CCDC171+:E023:upstream	chr9	15639449	15639450	rs10962103
chr9	15623412	15657128	chr9_CCDC171+:E023:upstream	chr9	15645714	15645715	rs12340969
chr9	15623412	15657128	chr9_CCDC171+:E023:upstream	chr9	15641280	15641281	rs2175082
chr9	15623412	15657128	chr9_CCDC171+:E023:upstream	chr9	15636261	15636262	rs451878
chr9	15623412	15657128	chr9_CCDC171+:E023:upstream	chr9	15634327	15634328	rs4740619
chr9	15623412	15657128	chr9_CCDC171+:E023:upstream	chr9	15655979	15655980	rs4741528
chr9	15623412	15657128	chr9_CCDC171+:E023:upstream	chr9	15650505	15650506	rs7023275
chr9	15623412	15657128	chr9_CCDC171+:E023:upstream	chr9	15654255	15654256	rs7025669
chr9	15623412	15657128	chr9_CCDC171+:E023:upstream	chr9	15653594	15653595	rs7036172
chr9	15623412	15657128	chr9_CCDC171+:E023:upstream	chr9	15653883	15653884	rs7036674
chr9	124356914	124384599	chr9_PSMB7-:E003:upstream	chr9	124364892	124364893	rs10119911
chr9	124356914	124384599	chr9_PSMB7-:E003:upstream	chr9	124367857	124367858	rs10818950
chr9	124356914	124384599	chr9_PSMB7-:E003:upstream	chr9	124368782	124368783	rs10818951
chr9	124356914	124384599	chr9_PSMB7-:E003:upstream	chr9	124361021	124361022	rs11789637
chr9	124356914	124384599	chr9_PSMB7-:E003:upstream	chr9	124369740	124369741	rs3758207
chr9	124356914	124384599	chr9_PSMB7-:E003:upstream	chr9	124365530	124365531	rs6478658
chr9	124356914	124384599	chr9_PSMB7-:E003:upstream	chr9	124357076	124357077	rs912353
chr9	124356914	124384599	chr9_PSMB7-:E003:upstream	chr9	124380598	124380599	rs10123514
chr9	124356914	124384599	chr9_PSMB7-:E003:upstream	chr9	124375523	124375524	rs10818952
chr9	124356914	124384599	chr9_PSMB7-:E003:upstream	chr9	124371640	124371641	rs6478660
chr9	37126941	37254852	chr9_ZCCHC7+:E015:upstream	chr9	37142211	37142212	rs10283534
chr9	37126941	37254852	chr9_ZCCHC7+:E015:upstream	chr9	37129498	37129499	rs13285624
chr9	37126941	37254852	chr9_ZCCHC7+:E015:upstream	chr9	37127680	37127681	rs13293465
chr9	37126941	37254852	chr9_ZCCHC7+:E015:upstream	chr9	37136361	37136362	rs13293916
chr9	37126941	37254852	chr9_ZCCHC7+:E015:upstream	chr9	37142191	37142192	rs13297576
chr9	37126941	37254852	chr9_ZCCHC7+:E015:upstream	chr9	37137984	37137985	rs13300560
chr9	37126941	37254852	chr9_ZCCHC7+:E015:upstream	chr9	37141510	37141511	rs1492713
chr9	37126941	37254852	chr9_ZCCHC7+:E015:upstream	chr9	37141261	37141262	rs1492714
chr9	37126941	37254852	chr9_ZCCHC7+:E015:upstream	chr9	37131980	37131981	rs2172364
chr9	37126941	37254852	chr9_ZCCHC7+:E015:upstream	chr9	37138674	37138675	rs7851239
chr9	37126941	37254852	chr9_ZCCHC7+:E015:upstream	chr9	37127547	37127548	rs7856690
chr9	37126941	37254852	chr9_ZCCHC7+:E015:upstream	chr9	37148107	37148108	rs12337316
chr9	37126941	37254852	chr9_ZCCHC7+:E015:upstream	chr9	37157966	37157967	rs13295115
chr9	37126941	37254852	chr9_ZCCHC7+:E015:upstream	chr9	37144064	37144065	rs1388978
chr9	37126941	37254852	chr9_ZCCHC7+:E015:upstream	chr9	37167216	37167217	rs10116283
chr9	37126941	37254852	chr9_ZCCHC7+:E015:upstream	chr9	37169659	37169660	rs2172363
chr9	37126941	37254852	chr9_ZCCHC7+:E015:upstream	chr9	37162284	37162285	rs6476616
chr9	37126941	37254852	chr9_ZCCHC7+:E015:upstream	chr9	37172422	37172423	rs7047931
chr9	37126941	37254852	chr9_ZCCHC7+:E015:upstream	chr9	37167541	37167542	rs7846747
chr9	37126941	37254852	chr9_ZCCHC7+:E015:upstream	chr9	37167841	37167842	rs7847215
chr9	37126941	37254852	chr9_ZCCHC7+:E015:upstream	chr9	37182052	37182053	rs13285022
chr9	37126941	37254852	chr9_ZCCHC7+:E015:upstream	chr9	37183630	37183631	rs13290794
chr9	37126941	37254852	chr9_ZCCHC7+:E015:upstream	chr9	37182894	37182895	rs7038219
chr9	37126941	37254852	chr9_ZCCHC7+:E015:upstream	chr9	37179381	37179382	rs7047479
chr9	37126941	37254852	chr9_ZCCHC7+:E015:upstream	chr9	37193873	37193874	rs10814515
chr9	37126941	37254852	chr9_ZCCHC7+:E015:upstream	chr9	37207682	37207683	rs2131315
chr9	37126941	37254852	chr9_ZCCHC7+:E015:upstream	chr9	37200105	37200106	rs6476617
chr9	37126941	37254852	chr9_ZCCHC7+:E015:upstream	chr9	37209398	37209399	rs1472169
chr9	37126941	37254852	chr9_ZCCHC7+:E015:upstream	chr9	37210687	37210688	rs6476619
chr9	37126941	37254852	chr9_ZCCHC7+:E015:upstream	chr9	37208390	37208391	rs7042957
chr9	37126941	37254852	chr9_ZCCHC7+:E015:upstream	chr9	37239759	37239760	rs623871
chr9	37126941	37254852	chr9_ZCCHC7+:E015:upstream	chr9	37230977	37230978	rs717546
chr9	37126941	37254852	chr9_ZCCHC7+:E015:upstream	chr9	37254692	37254693	rs10758428
chr9	37126941	37254852	chr9_ZCCHC7+:E015:upstream	chr9	37254141	37254142	rs10973268
chr9	37126941	37254852	chr9_ZCCHC7+:E015:upstream	chr9	37244507	37244508	rs12554976
chr9	37126941	37254852	chr9_ZCCHC7+:E015:upstream	chr9	37245478	37245479	rs563132
chr9	37126941	37254852	chr9_ZCCHC7+:E015:upstream	chr9	37250730	37250731	rs7044356
chr9	37126941	37254852	chr9_ZCCHC7+:E015:upstream	chr9	37248795	37248796	rs7869485
chr10	21624748	21635041	chr10_MLLT10+:E026:downstream	chr10	21626689	21626690	rs1243180
chr10	21624748	21635041	chr10_MLLT10+:E026:downstream	chr10	21627538	21627539	rs1243181
chr10	21624748	21635041	chr10_MLLT10+:E026:downstream	chr10	21627798	21627799	rs1243182
chr10	16593495	16695024	chr10_RSU1-:E003:downstream	chr10	16676607	16676608	rs10795415
chr10	16593495	16695024	chr10_RSU1-:E003:downstream	chr10	16677088	16677089	rs12572686
chr10	16593495	16695024	chr10_RSU1-:E003:downstream	chr10	16677035	16677036	rs17139010
chr10	16593495	16695024	chr10_RSU1-:E003:downstream	chr10	16679563	16679564	rs10904789
chr10	16593495	16695024	chr10_RSU1-:E003:downstream	chr10	16680347	16680348	rs10904791
chr10	16593495	16695024	chr10_RSU1-:E003:downstream	chr10	16691336	16691337	rs1870149
chr10	16593495	16695024	chr10_RSU1-:E003:downstream	chr10	16679066	16679067	rs3864820
chr10	16593495	16695024	chr10_RSU1-:E003:downstream	chr10	16679496	16679497	rs3864821
chr10	102776416	102796677	chr10_WBP1L+:E003:downstream	chr10	102776602	102776603	rs4147157
chr10	102776416	102796677	chr10_WBP1L+:E003:downstream	chr10	102790321	102790322	rs284841
chr10	102776416	102796677	chr10_WBP1L+:E003:downstream	chr10	102796296	102796297	rs176185
chr10	102776416	102796677	chr10_WBP1L+:E003:downstream	chr10	102794771	102794772	rs284844
chr11	43854863	43855145	chr11_HSD17B12+:E018:downstream	chr11	43854884	43854885	rs3736505
chr11	131370887	131581927	chr11_NTM+:E002:downstream	chr11	131579470	131579471	rs7925725
chr11	131370887	131581927	chr11_NTM+:E002:downstream	chr11	131579544	131579545	rs7925748
chr11	76792768	76795610	chr11_TSKU+:E005:downstream	chr11	76794157	76794158	rs10899283
chr12	123937829	123942745	chr12_CCDC92-:E001:downstream	chr12	123939052	123939053	rs4930723
chr12	123937829	123942745	chr12_CCDC92-:E001:downstream	chr12	123939269	123939270	rs4930724
chr12	123947112	123956285	chr12_CCDC92-:E008:downstream	chr12	123951240	123951241	rs4405410
chr12	123947112	123956285	chr12_CCDC92-:E008:downstream	chr12	123955562	123955563	rs4765219
chr12	123947112	123956285	chr12_CCDC92-:E008:downstream	chr12	123954425	123954426	rs7132655
chr12	123947112	123956285	chr12_CCDC92-:E008:downstream	chr12	123956195	123956196	rs7958691
chr12	123947112	123956285	chr12_CCDC92-:E008:downstream	chr12	123952667	123952668	rs7961449
chr12	122193003	122200190	chr12_LRRC43+:E011:downstream	chr12	122194059	122194060	rs11060333
chr12	19207815	19243181	chr12_PLEKHA5+:E014:downstream	chr12	19215885	19215886	rs10841180
chr12	19207815	19243181	chr12_PLEKHA5+:E014:downstream	chr12	19226758	19226759	rs10841188
chr12	19207815	19243181	chr12_PLEKHA5+:E014:downstream	chr12	19223516	19223517	rs1492129
chr12	19207815	19243181	chr12_PLEKHA5+:E014:downstream	chr12	19241225	19241226	rs10770454
chr12	830159	851021	chr12_WNK1+:E007:downstream	chr12	834786	834787	rs11064560
chr12	830159	851021	chr12_WNK1+:E007:downstream	chr12	830313	830314	rs11611246
chr12	830159	851021	chr12_WNK1+:E007:downstream	chr12	841914	841915	rs10849568
chr12	830159	851021	chr12_WNK1+:E007:downstream	chr12	842608	842609	rs1990021
chr12	830159	851021	chr12_WNK1+:E007:downstream	chr12	836870	836871	rs4980969
chr12	69390869	69407161	chr12_YEATS4+:E009:downstream	chr12	69396999	69397000	rs315140
chr12	69390869	69407161	chr12_YEATS4+:E009:downstream	chr12	69400305	69400306	rs315145
chr13	32694303	32696855	chr13_PDS5B+:E018:downstream	chr13	32694913	32694914	rs17516171
chr13	32694303	32696855	chr13_PDS5B+:E018:downstream	chr13	32696213	32696214	rs9315177
chr15	41669957	41696076	chr15_MGA+:E013:downstream	chr15	41671935	41671936	rs1867417
chr15	41669957	41696076	chr15_MGA+:E013:downstream	chr15	41679702	41679703	rs4465584
chr15	41669957	41696076	chr15_MGA+:E013:downstream	chr15	41679014	41679015	rs7178205
chr15	41669957	41696076	chr15_MGA+:E013:downstream	chr15	41684090	41684091	rs11070347
chr15	41669957	41696076	chr15_MGA+:E013:downstream	chr15	41692339	41692340	rs12441249
chr15	41669957	41696076	chr15_MGA+:E013:downstream	chr15	41694440	41694441	rs12915325
chr15	41669957	41696076	chr15_MGA+:E013:downstream	chr15	41682928	41682929	rs12916992
chr15	41669957	41696076	chr15_MGA+:E013:downstream	chr15	41687473	41687474	rs4923908
chr15	41669957	41696076	chr15_MGA+:E013:downstream	chr15	41690004	41690005	rs7169496
chr15	51896525	51900156	chr15_TMOD3+:E010:downstream	chr15	51898945	51898946	rs2959298
chr16	30067037	30070422	chr16_ALDOA+:E005:downstream	chr16	30067170	30067171	rs9783783
chr16	29972139	29972951	chr16_TMEM219+:E012:downstream	chr16	29972748	29972749	rs11901
chr16	72960193	73047753	chr16_ZFHX3-:E010:downstream	chr16	72962262	72962263	rs756717
chr17	67959874	67963334	chr17_BPTF+:E035:downstream	chr17	67961451	67961452	rs9899520
chr17	29706850	29710988	chr17_SSH2-:E022:downstream	chr17	29710904	29710905	rs2874505
chr17	29706850	29710988	chr17_SSH2-:E022:downstream	chr17	29707995	29707996	rs3115090
chr17	29706850	29710988	chr17_SSH2-:E022:downstream	chr17	29709331	29709332	rs3115092
chr19	1825942	1826879	chr19_REXO1-:E023:downstream	chr19	1826112	1826113	rs2304615
chr19	1825942	1826879	chr19_REXO1-:E023:downstream	chr19	1826164	1826165	rs2304616
chr1	1815861	1817838	chr1_GNB1-:E013:downstream	chr1	1817294	1817295	rs2180311
chr1	39084437	39105380	chr1_MACF1+:E006:downstream	chr1	39103898	39103899	rs2282231
chr1	39105716	39157947	chr1_MACF1+:E007:downstream	chr1	39112859	39112860	rs4660165
chr1	39105716	39157947	chr1_MACF1+:E007:downstream	chr1	39126106	39126107	rs4660443
chr1	39205130	39213762	chr1_MACF1+:E009:downstream	chr1	39213317	39213318	rs4660543
chr1	39347209	39349479	chr1_MACF1+:E056:downstream	chr1	39349287	39349288	rs3754346
chr1	39388657	39422375	chr1_MACF1+:E074:downstream	chr1	39414646	39414647	rs3768302
chr1	39429325	39429828	chr1_MACF1+:E080:downstream	chr1	39429608	39429609	rs682571
chr1	39430907	39432536	chr1_MACF1+:E082:downstream	chr1	39431598	39431599	rs599823
chr1	39439499	39441004	chr1_MACF1+:E089:downstream	chr1	39439915	39439916	rs2018212
chr1	39444834	39447433	chr1_MACF1+:E097:downstream	chr1	39445011	39445012	rs617577
chr1	39447586	39447693	chr1_MACF1+:E098:downstream	chr1	39447678	39447679	rs2296173
chr1	45608336	45613170	chr1_NASP+:E010:downstream	chr1	45612957	45612958	rs2050376
chr1	62128944	62148285	chr1_PATJ+:E054:downstream	chr1	62131006	62131007	rs2457815
chr1	62128944	62148285	chr1_PATJ+:E054:downstream	chr1	62129004	62129005	rs2481665
chr1	77092489	77122276	chr1_PIGK-:E001:downstream	chr1	77092672	77092673	rs2036444
chr1	8656440	8703056	chr1_RERE-:E025:downstream	chr1	8664462	8664463	rs10864360
chr1	8656440	8703056	chr1_RERE-:E025:downstream	chr1	8666661	8666662	rs10864361
chr1	8656440	8703056	chr1_RERE-:E025:downstream	chr1	8673068	8673069	rs11121215
chr1	8656440	8703056	chr1_RERE-:E025:downstream	chr1	8681341	8681342	rs7556169
chr20	49219540	49221453	chr20_DDX27+:E001:downstream	chr20	49220588	49220589	rs6012617
chr2	69463823	69466553	chr2_AAK1-:E001:downstream	chr2	69465873	69465874	rs9309428
chr2	44478729	44502195	chr2_CAMKMT+:E020:downstream	chr2	44481569	44481570	rs1145519
chr2	44478729	44502195	chr2_CAMKMT+:E020:downstream	chr2	44479834	44479835	rs698815
chr2	44478729	44502195	chr2_CAMKMT+:E020:downstream	chr2	44482629	44482630	rs698818
chr2	44478729	44502195	chr2_CAMKMT+:E020:downstream	chr2	44484929	44484930	rs786401
chr2	44478729	44502195	chr2_CAMKMT+:E020:downstream	chr2	44483227	44483228	rs786405
chr2	44478729	44502195	chr2_CAMKMT+:E020:downstream	chr2	44492753	44492754	rs786420
chr2	44478729	44502195	chr2_CAMKMT+:E020:downstream	chr2	44497907	44497908	rs811494
chr2	44478729	44502195	chr2_CAMKMT+:E020:downstream	chr2	44501278	44501279	rs698826
chr2	158477914	158533181	chr2_PKP4+:E007:downstream	chr2	158516088	158516089	rs11679163
chr2	158477914	158533181	chr2_PKP4+:E007:downstream	chr2	158531501	158531502	rs2111877
chr2	86618012	86622662	chr2_RNF103-:E004:downstream	chr2	86619365	86619366	rs308901
chr2	36787275	36801302	chr2_VIT+:E016:downstream	chr2	36793946	36793947	rs11677279
chr2	36787275	36801302	chr2_VIT+:E016:downstream	chr2	36797569	36797570	rs12987048
chr2	36787275	36801302	chr2_VIT+:E016:downstream	chr2	36795900	36795901	rs4670169
chr3	15781654	15795224	chr3_ANKRD28-:E035:downstream	chr3	15787619	15787620	rs10510443
chr3	15781654	15795224	chr3_ANKRD28-:E035:downstream	chr3	15790017	15790018	rs12637353
chr3	15781654	15795224	chr3_ANKRD28-:E035:downstream	chr3	15790909	15790910	rs4685260
chr3	107677469	107710453	chr3_BBX+:E028:downstream	chr3	107686197	107686198	rs17811557
chr3	157153155	157156937	chr3_CCNL1-:E013:downstream	chr3	157155430	157155431	rs4680342
chr3	154316162	154324175	chr3_DHX36-:E027:downstream	chr3	154320622	154320623	rs171390
chr3	154316162	154324175	chr3_DHX36-:E027:downstream	chr3	154318916	154318917	rs355772
chr3	154316162	154324175	chr3_DHX36-:E027:downstream	chr3	154318339	154318340	rs355775
chr3	154316162	154324175	chr3_DHX36-:E027:downstream	chr3	154317160	154317161	rs355777
chr3	154316162	154324175	chr3_DHX36-:E027:downstream	chr3	154321595	154321596	rs355771
chr3	120002238	120093348	chr3_GSK3B-:E013:downstream	chr3	120014862	120014863	rs4688054
chr3	120002238	120093348	chr3_GSK3B-:E013:downstream	chr3	120038165	120038166	rs1870931
chr3	120002238	120093348	chr3_GSK3B-:E013:downstream	chr3	120048474	120048475	rs10934505
chr3	120002238	120093348	chr3_GSK3B-:E013:downstream	chr3	120051804	120051805	rs10934506
chr3	120002238	120093348	chr3_GSK3B-:E013:downstream	chr3	120051812	120051813	rs10934507
chr3	120002238	120093348	chr3_GSK3B-:E013:downstream	chr3	120092720	120092721	rs4688059
chr3	136930593	136945584	chr3_NCK1+:E005:downstream	chr3	136932310	136932311	rs10935210
chr3	136930593	136945584	chr3_NCK1+:E005:downstream	chr3	136933121	136933122	rs1344790
chr3	136930593	136945584	chr3_NCK1+:E005:downstream	chr3	136932674	136932675	rs1965109
chr3	136930593	136945584	chr3_NCK1+:E005:downstream	chr3	136935841	136935842	rs3963921
chr3	136930593	136945584	chr3_NCK1+:E005:downstream	chr3	136934840	136934841	rs4678275
chr3	136930593	136945584	chr3_NCK1+:E005:downstream	chr3	136936470	136936471	rs6771717
chr3	136930593	136945584	chr3_NCK1+:E005:downstream	chr3	136937186	136937187	rs6786302
chr3	136930593	136945584	chr3_NCK1+:E005:downstream	chr3	136934038	136934039	rs7611847
chr3	136930593	136945584	chr3_NCK1+:E005:downstream	chr3	136930620	136930621	rs7648817
chr3	136930593	136945584	chr3_NCK1+:E005:downstream	chr3	136943219	136943220	rs3845925
chr3	136930593	136945584	chr3_NCK1+:E005:downstream	chr3	136940881	136940882	rs6775389
chr3	136930593	136945584	chr3_NCK1+:E005:downstream	chr3	136943760	136943761	rs9833952
chr3	62078257	62132603	chr3_PTPRG+:E009:downstream	chr3	62120804	62120805	rs11917047
chr3	62078257	62132603	chr3_PTPRG+:E009:downstream	chr3	62115165	62115166	rs1911746
chr3	62078257	62132603	chr3_PTPRG+:E009:downstream	chr3	62125799	62125800	rs6798094
chr3	158203244	158225658	chr3_RSRC1+:E008:downstream	chr3	158203602	158203603	rs827801
chr3	158203244	158225658	chr3_RSRC1+:E008:downstream	chr3	158204320	158204321	rs1624094
chr3	158203244	158225658	chr3_RSRC1+:E008:downstream	chr3	158210109	158210110	rs1729997
chr3	158203244	158225658	chr3_RSRC1+:E008:downstream	chr3	158210234	158210235	rs1729998
chr3	158203244	158225658	chr3_RSRC1+:E008:downstream	chr3	158210911	158210912	rs1729999
chr3	158203244	158225658	chr3_RSRC1+:E008:downstream	chr3	158219441	158219442	rs698981
chr3	158203244	158225658	chr3_RSRC1+:E008:downstream	chr3	158219392	158219393	rs698982
chr3	158203244	158225658	chr3_RSRC1+:E008:downstream	chr3	158216065	158216066	rs698986
chr3	158203244	158225658	chr3_RSRC1+:E008:downstream	chr3	158205661	158205662	rs827141
chr3	158203244	158225658	chr3_RSRC1+:E008:downstream	chr3	158205991	158205992	rs827142
chr3	158203244	158225658	chr3_RSRC1+:E008:downstream	chr3	158206531	158206532	rs827143
chr3	158203244	158225658	chr3_RSRC1+:E008:downstream	chr3	158206583	158206584	rs852110
chr3	158203244	158225658	chr3_RSRC1+:E008:downstream	chr3	158223443	158223444	rs696715
chr3	158203244	158225658	chr3_RSRC1+:E008:downstream	chr3	158221589	158221590	rs698975
chr3	158203244	158225658	chr3_RSRC1+:E008:downstream	chr3	158221419	158221420	rs698976
chr3	158203244	158225658	chr3_RSRC1+:E008:downstream	chr3	158225070	158225071	rs698988
chr3	158203244	158225658	chr3_RSRC1+:E008:downstream	chr3	158224086	158224087	rs699921
chr3	158203244	158225658	chr3_RSRC1+:E008:downstream	chr3	158223984	158223985	rs699922
chr3	158203244	158225658	chr3_RSRC1+:E008:downstream	chr3	158222605	158222606	rs827806
chr3	158203244	158225658	chr3_RSRC1+:E008:downstream	chr3	158224119	158224120	rs827807
chr3	157261369	157265527	chr3_VEPH1-:E002:downstream	chr3	157263035	157263036	rs13061214
chr3	157261369	157265527	chr3_VEPH1-:E002:downstream	chr3	157263031	157263032	rs13081036
chr3	157261369	157265527	chr3_VEPH1-:E002:downstream	chr3	157262416	157262417	rs1587535
chr3	157261369	157265527	chr3_VEPH1-:E002:downstream	chr3	157264255	157264256	rs1608127
chr3	157261369	157265527	chr3_VEPH1-:E002:downstream	chr3	157265483	157265484	rs3749214
chr3	157261369	157265527	chr3_VEPH1-:E002:downstream	chr3	157261969	157261970	rs6441123
chr3	157261369	157265527	chr3_VEPH1-:E002:downstream	chr3	157262228	157262229	rs7625059
chr3	195070110	195144616	chr3_XXYLT1-:E003:downstream	chr3	195130970	195130971	rs1552893
chr3	195070110	195144616	chr3_XXYLT1-:E003:downstream	chr3	195126595	195126596	rs3897755
chr3	195070110	195144616	chr3_XXYLT1-:E003:downstream	chr3	195126203	195126204	rs4266129
chr3	195070110	195144616	chr3_XXYLT1-:E003:downstream	chr3	195126173	195126174	rs4300953
chr3	195070110	195144616	chr3_XXYLT1-:E003:downstream	chr3	195118028	195118029	rs4677661
chr3	195070110	195144616	chr3_XXYLT1-:E003:downstream	chr3	195121415	195121416	rs6784890
chr3	195070110	195144616	chr3_XXYLT1-:E003:downstream	chr3	195132710	195132711	rs874198
chr3	195070110	195144616	chr3_XXYLT1-:E003:downstream	chr3	195126920	195126921	rs950257
chr3	195070110	195144616	chr3_XXYLT1-:E003:downstream	chr3	195118854	195118855	rs9825174
chr3	195070110	195144616	chr3_XXYLT1-:E003:downstream	chr3	195136856	195136857	rs1009642
chr3	195070110	195144616	chr3_XXYLT1-:E003:downstream	chr3	195137644	195137645	rs2131877
chr3	195070110	195144616	chr3_XXYLT1-:E003:downstream	chr3	195134252	195134253	rs2172695
chr3	195070110	195144616	chr3_XXYLT1-:E003:downstream	chr3	195134945	195134946	rs3892194
chr3	195070110	195144616	chr3_XXYLT1-:E003:downstream	chr3	195136017	195136018	rs4677810
chr3	195070110	195144616	chr3_XXYLT1-:E003:downstream	chr3	195143064	195143065	rs4677812
chr3	195070110	195144616	chr3_XXYLT1-:E003:downstream	chr3	195135224	195135225	rs7644208
chr3	195259500	195270090	chr3_XXYLT1-:E012:downstream	chr3	195266839	195266840	rs4677666
chr5	158840109	158941695	chr5_EBF1-:E021:downstream	chr5	158844671	158844672	rs17056301
chr5	158840109	158941695	chr5_EBF1-:E021:downstream	chr5	158852629	158852630	rs891903
chr5	154034966	154036243	chr5_FAM114A2-:E017:downstream	chr5	154036136	154036137	rs10039286
chr5	154034966	154036243	chr5_FAM114A2-:E017:downstream	chr5	154035921	154035922	rs2560046
chr6	56900620	56953759	chr6_DST-:E122:downstream	chr6	56945740	56945741	rs1020548
chr6	56900620	56953759	chr6_DST-:E122:downstream	chr6	56946325	56946326	rs2817573
chr6	108569741	108585154	chr6_FOXO3+:E006:downstream	chr6	108574182	108574183	rs2490272
chr6	108569741	108585154	chr6_FOXO3+:E006:downstream	chr6	108575011	108575012	rs2802288
chr6	108569741	108585154	chr6_FOXO3+:E006:downstream	chr6	108584996	108584997	rs12206094
chr6	108569741	108585154	chr6_FOXO3+:E006:downstream	chr6	108584476	108584477	rs2802290
chr6	108589814	108639494	chr6_FOXO3+:E007:downstream	chr6	108617879	108617880	rs12202234
chr6	108589814	108639494	chr6_FOXO3+:E007:downstream	chr6	108620189	108620190	rs17598747
chr6	108589814	108639494	chr6_FOXO3+:E007:downstream	chr6	108624166	108624167	rs2022464
chr6	108589814	108639494	chr6_FOXO3+:E007:downstream	chr6	108613257	108613258	rs2764264
chr6	108589814	108639494	chr6_FOXO3+:E007:downstream	chr6	108638821	108638822	rs12202209
chr6	108589814	108639494	chr6_FOXO3+:E007:downstream	chr6	108636326	108636327	rs17310529
chr6	108639608	108656209	chr6_FOXO3+:E008:downstream	chr6	108643835	108643836	rs10457180
chr6	108639608	108656209	chr6_FOXO3+:E008:downstream	chr6	108653249	108653250	rs11153120
chr6	108639608	108656209	chr6_FOXO3+:E008:downstream	chr6	108653374	108653375	rs12154031
chr6	108639608	108656209	chr6_FOXO3+:E008:downstream	chr6	108650452	108650453	rs12197634
chr6	108639608	108656209	chr6_FOXO3+:E008:downstream	chr6	108647473	108647474	rs12202049
chr6	108639608	108656209	chr6_FOXO3+:E008:downstream	chr6	108643681	108643682	rs12207868
chr6	108639608	108656209	chr6_FOXO3+:E008:downstream	chr6	108649476	108649477	rs12209092
chr6	108639608	108656209	chr6_FOXO3+:E008:downstream	chr6	108652894	108652895	rs13217795
chr6	108639608	108656209	chr6_FOXO3+:E008:downstream	chr6	108653542	108653543	rs4946932
chr6	108656537	108663456	chr6_FOXO3+:E011:downstream	chr6	108662863	108662864	rs12196996
chr6	108656537	108663456	chr6_FOXO3+:E011:downstream	chr6	108659992	108659993	rs12212067
chr6	108656537	108663456	chr6_FOXO3+:E011:downstream	chr6	108662323	108662324	rs9398171
chr6	108664888	108679828	chr6_FOXO3+:E012:downstream	chr6	108666980	108666981	rs2153960
chr6	108664888	108679828	chr6_FOXO3+:E012:downstream	chr6	108665402	108665403	rs3778586
chr6	108664888	108679828	chr6_FOXO3+:E012:downstream	chr6	108667391	108667392	rs3800226
chr6	108664888	108679828	chr6_FOXO3+:E012:downstream	chr6	108672957	108672958	rs3800227
chr6	108664888	108679828	chr6_FOXO3+:E012:downstream	chr6	108673622	108673623	rs9398172
chr6	108664888	108679828	chr6_FOXO3+:E012:downstream	chr6	108678083	108678084	rs1935949
chr6	108664888	108679828	chr6_FOXO3+:E012:downstream	chr6	108677701	108677702	rs1935952
chr6	108664888	108679828	chr6_FOXO3+:E012:downstream	chr6	108675759	108675760	rs3800229
chr6	108664888	108679828	chr6_FOXO3+:E012:downstream	chr6	108676924	108676925	rs3800230
chr6	108664888	108679828	chr6_FOXO3+:E012:downstream	chr6	108679538	108679539	rs4946935
chr6	63528083	63571800	chr6_PTP4A1+:E001:downstream	chr6	63529499	63529500	rs1681942
chr6	63528083	63571800	chr6_PTP4A1+:E001:downstream	chr6	63530610	63530611	rs2622274
chr6	63528083	63571800	chr6_PTP4A1+:E001:downstream	chr6	63544081	63544082	rs1322415
chr6	63528083	63571800	chr6_PTP4A1+:E001:downstream	chr6	63544113	63544114	rs1322416
chr6	46456977	46480270	chr6_RCAN2-:E006:downstream	chr6	46471707	46471708	rs1527702
chr6	46456977	46480270	chr6_RCAN2-:E006:downstream	chr6	46476190	46476191	rs1534362
chr6	46456977	46480270	chr6_RCAN2-:E006:downstream	chr6	46475030	46475031	rs1538992
chr6	46456977	46480270	chr6_RCAN2-:E006:downstream	chr6	46473690	46473691	rs1538993
chr6	46456977	46480270	chr6_RCAN2-:E006:downstream	chr6	46473111	46473112	rs2141222
chr6	46456977	46480270	chr6_RCAN2-:E006:downstream	chr6	46467185	46467186	rs876121
chr7	74718940	74728787	chr7_GTF2I+:E014:downstream	chr7	74723787	74723788	rs2267812
chr7	114942396	114979507	chr7_MDFIC+:E004:downstream	chr7	114945613	114945614	rs10259595
chr7	114942396	114979507	chr7_MDFIC+:E004:downstream	chr7	114948484	114948485	rs4344019
chr7	114942396	114979507	chr7_MDFIC+:E004:downstream	chr7	114943701	114943702	rs4551278
chr7	114942396	114979507	chr7_MDFIC+:E004:downstream	chr7	114946819	114946820	rs4557633
chr7	114942396	114979507	chr7_MDFIC+:E004:downstream	chr7	114943042	114943043	rs4609131
chr7	114942396	114979507	chr7_MDFIC+:E004:downstream	chr7	114947369	114947370	rs4727808
chr7	114942396	114979507	chr7_MDFIC+:E004:downstream	chr7	114950172	114950173	rs10247983
chr7	99564704	99571689	chr7_ZNF655+:E012:downstream	chr7	99566326	99566327	rs11981478
chr8	115415083	115418331	chr8_TRPS1-:E002:downstream	chr8	115417769	115417770	rs808994
chr8	115605001	115619133	chr8_TRPS1-:E005:downstream	chr8	115610678	115610679	rs2245019
chr8	115605001	115619133	chr8_TRPS1-:E005:downstream	chr8	115608076	115608077	rs2721932
chr8	115605001	115619133	chr8_TRPS1-:E005:downstream	chr8	115619050	115619051	rs2737218
chr8	115620059	115623602	chr8_TRPS1-:E006:downstream	chr8	115621471	115621472	rs2721937
chr9	16705141	16727798	chr9_BNC2-:E023:downstream	chr9	16715658	16715659	rs10481558
chr9	16705141	16727798	chr9_BNC2-:E023:downstream	chr9	16713667	16713668	rs10738451
chr9	16705141	16727798	chr9_BNC2-:E023:downstream	chr9	16717274	16717275	rs10738452
chr9	16705141	16727798	chr9_BNC2-:E023:downstream	chr9	16718437	16718438	rs10756788
chr9	16705141	16727798	chr9_BNC2-:E023:downstream	chr9	16720123	16720124	rs10756789
chr9	16705141	16727798	chr9_BNC2-:E023:downstream	chr9	16720199	16720200	rs10756790
chr9	16705141	16727798	chr9_BNC2-:E023:downstream	chr9	16724456	16724457	rs10756791
chr9	16705141	16727798	chr9_BNC2-:E023:downstream	chr9	16722305	16722306	rs10810597
chr9	16705141	16727798	chr9_BNC2-:E023:downstream	chr9	16719446	16719447	rs10962549
chr9	16705141	16727798	chr9_BNC2-:E023:downstream	chr9	16720330	16720331	rs10962550
chr9	16705141	16727798	chr9_BNC2-:E023:downstream	chr9	16715827	16715828	rs1330303
chr9	16705141	16727798	chr9_BNC2-:E023:downstream	chr9	16714630	16714631	rs1330304
chr9	16727996	16738361	chr9_BNC2-:E024:downstream	chr9	16733660	16733661	rs1411430
chr9	16727996	16738361	chr9_BNC2-:E024:downstream	chr9	16734192	16734193	rs2150090
chr9	16727996	16738361	chr9_BNC2-:E024:downstream	chr9	16733958	16733959	rs2840290
chr9	15657218	15666164	chr9_CCDC171+:E023:downstream	chr9	15660498	15660499	rs10756688
chr9	15657218	15666164	chr9_CCDC171+:E023:downstream	chr9	15660905	15660906	rs10756689
chr9	15657218	15666164	chr9_CCDC171+:E023:downstream	chr9	15658795	15658796	rs10962110
chr9	15657218	15666164	chr9_CCDC171+:E023:downstream	chr9	15665202	15665203	rs7034484
chr9	6893231	6980926	chr9_KDM4C+:E015:downstream	chr9	6924117	6924118	rs12380111
chr9	6893231	6980926	chr9_KDM4C+:E015:downstream	chr9	6922752	6922753	rs6477128
chr9	6893231	6980926	chr9_KDM4C+:E015:downstream	chr9	6932012	6932013	rs7031406
chr9	6893231	6980926	chr9_KDM4C+:E015:downstream	chr9	6942939	6942940	rs7037266
chr9	6893231	6980926	chr9_KDM4C+:E015:downstream	chr9	6958298	6958299	rs10758809
chr9	6893231	6980926	chr9_KDM4C+:E015:downstream	chr9	6962573	6962574	rs10815490
chr9	6893231	6980926	chr9_KDM4C+:E015:downstream	chr9	6962694	6962695	rs10815491
chr9	6893231	6980926	chr9_KDM4C+:E015:downstream	chr9	6950133	6950134	rs10975928
chr9	6893231	6980926	chr9_KDM4C+:E015:downstream	chr9	6954556	6954557	rs10975933
chr9	6893231	6980926	chr9_KDM4C+:E015:downstream	chr9	6956849	6956850	rs12352785
chr9	6893231	6980926	chr9_KDM4C+:E015:downstream	chr9	6953553	6953554	rs7019108
chr9	6893231	6980926	chr9_KDM4C+:E015:downstream	chr9	6959839	6959840	rs7042372
chr9	6893231	6980926	chr9_KDM4C+:E015:downstream	chr9	6947483	6947484	rs7046665
chr9	6893231	6980926	chr9_KDM4C+:E015:downstream	chr9	6961870	6961871	rs9657633
chr9	6893231	6980926	chr9_KDM4C+:E015:downstream	chr9	6968602	6968603	rs818902
chr9	124384655	124405318	chr9_PSMB7-:E003:downstream	chr9	124385949	124385950	rs17315546
chr9	124384655	124405318	chr9_PSMB7-:E003:downstream	chr9	124393803	124393804	rs10760356
chr9	124384655	124405318	chr9_PSMB7-:E003:downstream	chr9	124390305	124390306	rs10818957
chr9	124384655	124405318	chr9_PSMB7-:E003:downstream	chr9	124400608	124400609	rs7864941
chr9	37260564	37302189	chr9_ZCCHC7+:E015:downstream	chr9	37261657	37261658	rs10973277
chr9	37260564	37302189	chr9_ZCCHC7+:E015:downstream	chr9	37266125	37266126	rs1339553
chr9	37260564	37302189	chr9_ZCCHC7+:E015:downstream	chr9	37261237	37261238	rs7037816
chr9	37260564	37302189	chr9_ZCCHC7+:E015:downstream	chr9	37281055	37281056	rs12380446
chr9	37260564	37302189	chr9_ZCCHC7+:E015:downstream	chr9	37273675	37273676	rs13283411
chr9	37260564	37302189	chr9_ZCCHC7+:E015:downstream	chr9	37279163	37279164	rs1977756
chr9	37260564	37302189	chr9_ZCCHC7+:E015:downstream	chr9	37287407	37287408	rs2790063
chr9	37260564	37302189	chr9_ZCCHC7+:E015:downstream	chr9	37277605	37277606	rs308495
chr9	37260564	37302189	chr9_ZCCHC7+:E015:downstream	chr9	37276263	37276264	rs308496
chr9	37260564	37302189	chr9_ZCCHC7+:E015:downstream	chr9	37298022	37298023	rs308492

## Sheet: T2D obese conf vs day 3
exon_chr	exon_start	exon_end	exon_name	snp_chr	snp_start	snp_end	snp_name
chr10	91960153	91962539	chr10_BTAF1+:E020:upstream	chr10	91961250	91961251	10-93721008
chr10	91960153	91962539	chr10_BTAF1+:E020:upstream	chr10	91961267	91961268	10-93721025
chr10	91960153	91962539	chr10_BTAF1+:E020:upstream	chr10	91961885	91961886	10-93721643
chr10	91960153	91962539	chr10_BTAF1+:E020:upstream	chr10	91962441	91962442	10-93722199
chr10	91964200	91966638	chr10_BTAF1+:E023:upstream	chr10	91964830	91964831	10-93724588
chr10	91964200	91966638	chr10_BTAF1+:E023:upstream	chr10	91966199	91966200	10-93725957
chr10	91964200	91966638	chr10_BTAF1+:E023:upstream	chr10	91966332	91966333	10-93726090
chr11	72714320	72721851	chr11_ARAP1-:E033:upstream	chr11	72716065	72716066	11-72427111
chr11	72714320	72721851	chr11_ARAP1-:E033:upstream	chr11	72716509	72716510	11-72427555
chr11	72714320	72721851	chr11_ARAP1-:E033:upstream	chr11	72716992	72716993	11-72428038
chr11	72714320	72721851	chr11_ARAP1-:E033:upstream	chr11	72717102	72717103	11-72428148
chr11	72714320	72721851	chr11_ARAP1-:E033:upstream	chr11	72717126	72717127	11-72428172
chr11	72714320	72721851	chr11_ARAP1-:E033:upstream	chr11	72718095	72718096	11-72429141
chr11	72714320	72721851	chr11_ARAP1-:E033:upstream	chr11	72718533	72718534	11-72429579
chr11	72714320	72721851	chr11_ARAP1-:E033:upstream	chr11	72720633	72720634	11-72431679
chr11	43840063	43854716	chr11_HSD17B12+:E018:upstream	chr11	43840197	43840198	11-43861748
chr11	43840063	43854716	chr11_HSD17B12+:E018:upstream	chr11	43840774	43840775	11-43862325
chr11	43840063	43854716	chr11_HSD17B12+:E018:upstream	chr11	43841479	43841480	11-43863030
chr11	43840063	43854716	chr11_HSD17B12+:E018:upstream	chr11	43842727	43842728	11-43864278
chr11	43840063	43854716	chr11_HSD17B12+:E018:upstream	chr11	43844743	43844744	11-43866294
chr11	43840063	43854716	chr11_HSD17B12+:E018:upstream	chr11	43846101	43846102	11-43867652
chr11	43840063	43854716	chr11_HSD17B12+:E018:upstream	chr11	43846492	43846493	11-43868043
chr11	43840063	43854716	chr11_HSD17B12+:E018:upstream	chr11	43846817	43846818	11-43868368
chr11	43840063	43854716	chr11_HSD17B12+:E018:upstream	chr11	43847100	43847101	11-43868651
chr11	43840063	43854716	chr11_HSD17B12+:E018:upstream	chr11	43848309	43848310	11-43869860
chr11	43840063	43854716	chr11_HSD17B12+:E018:upstream	chr11	43848388	43848389	11-43869939
chr11	43840063	43854716	chr11_HSD17B12+:E018:upstream	chr11	43848429	43848430	11-43869980
chr11	43840063	43854716	chr11_HSD17B12+:E018:upstream	chr11	43849661	43849662	11-43871212
chr11	43840063	43854716	chr11_HSD17B12+:E018:upstream	chr11	43850246	43850247	11-43871797
chr11	43840063	43854716	chr11_HSD17B12+:E018:upstream	chr11	43850445	43850446	11-43871996
chr11	43840063	43854716	chr11_HSD17B12+:E018:upstream	chr11	43850904	43850905	11-43872455
chr11	43840063	43854716	chr11_HSD17B12+:E018:upstream	chr11	43853765	43853766	11-43875316
chr11	43840063	43854716	chr11_HSD17B12+:E018:upstream	chr11	43854163	43854164	11-43875714
chr11	43854863	43855145	chr11_HSD17B12+:E019:upstream	chr11	43854884	43854885	11-43876435
chr11	65444456	65444559	chr11_NEAT1+:E003:upstream	chr11	65444507	65444508	11-65211979
chr11	72781293	72792876	chr11_STARD10-:E007:upstream	chr11	72786416	72786417	11-72497462
chr11	72781293	72792876	chr11_STARD10-:E007:upstream	chr11	72787989	72787990	11-72499035
chr11	72781293	72792876	chr11_STARD10-:E007:upstream	chr11	72789956	72789957	11-72501002
chr13	30463693	30464162	chr13_HMGB1-:E009:upstream	chr13	30463765	30463766	13-31037903
chr14	91485729	91490748	chr14_PPP4R3A-:E020:upstream	chr14	91488162	91488163	14-91954507
chr14	91485729	91490748	chr14_PPP4R3A-:E020:upstream	chr14	91488544	91488545	14-91954889
chr14	91485729	91490748	chr14_PPP4R3A-:E020:upstream	chr14	91489197	91489198	14-91955542
chr15	41661056	41668829	chr15_MGA+:E013:upstream	chr15	41662414	41662415	15-41954613
chr15	41661056	41668829	chr15_MGA+:E013:upstream	chr15	41663626	41663627	15-41955825
chr15	41661056	41668829	chr15_MGA+:E013:upstream	chr15	41668112	41668113	15-41960311
chr15	75509026	75517260	chr15_PTPN9-:E009:upstream	chr15	75509812	75509813	15-75802154
chr15	75509026	75517260	chr15_PTPN9-:E009:upstream	chr15	75510858	75510859	15-75803200
chr15	75509026	75517260	chr15_PTPN9-:E009:upstream	chr15	75515350	75515351	15-75807692
chr15	75509026	75517260	chr15_PTPN9-:E009:upstream	chr15	75516449	75516450	15-75808791
chr15	75509026	75517260	chr15_PTPN9-:E009:upstream	chr15	75516630	75516631	15-75808972
chr16	29971577	29972043	chr16_TMEM219+:E012:upstream	chr16	29971639	29971640	16-29982961
chr16	29971577	29972043	chr16_TMEM219+:E012:upstream	chr16	29971797	29971798	16-29983119
chr16	29971577	29972043	chr16_TMEM219+:E012:upstream	chr16	29971826	29971827	16-29983148
chr17	67904839	67909583	chr17_BPTF+:E018:upstream	chr17	67906528	67906529	17-65902645
chr17	67904839	67909583	chr17_BPTF+:E018:upstream	chr17	67906889	67906890	17-65903006
chr17	67904839	67909583	chr17_BPTF+:E018:upstream	chr17	67907512	67907513	17-65903629
chr17	67944371	67945410	chr17_BPTF+:E031:upstream	chr17	67944610	67944611	17-65940727
chr17	67948305	67959542	chr17_BPTF+:E035:upstream	chr17	67948398	67948399	17-65944515
chr17	67948305	67959542	chr17_BPTF+:E035:upstream	chr17	67949419	67949420	17-65945536
chr17	67948305	67959542	chr17_BPTF+:E035:upstream	chr17	67949723	67949724	17-65945840
chr17	67948305	67959542	chr17_BPTF+:E035:upstream	chr17	67951523	67951524	17-65947640
chr17	67948305	67959542	chr17_BPTF+:E035:upstream	chr17	67951853	67951854	17-65947970
chr17	67948305	67959542	chr17_BPTF+:E035:upstream	chr17	67953876	67953877	17-65949993
chr17	67948305	67959542	chr17_BPTF+:E035:upstream	chr17	67954990	67954991	17-65951107
chr17	67948305	67959542	chr17_BPTF+:E035:upstream	chr17	67955016	67955017	17-65951133
chr17	67948305	67959542	chr17_BPTF+:E035:upstream	chr17	67957231	67957232	17-65953348
chr17	67948305	67959542	chr17_BPTF+:E035:upstream	chr17	67959167	67959168	17-65955284
chr17	42587863	42592057	chr17_RETREG3-:E009:upstream	chr17	42588994	42588995	17-40741013
chr17	42587863	42592057	chr17_RETREG3-:E009:upstream	chr17	42590210	42590211	17-40742229
chr17	42592161	42596534	chr17_RETREG3-:E010:upstream	chr17	42596528	42596529	17-40748547
chr17	17820520	17823519	chr17_SREBF1-:E028:upstream	chr17	17821474	17821475	17-17724789
chr17	17820520	17823519	chr17_SREBF1-:E028:upstream	chr17	17823154	17823155	17-17726469
chr17	17823663	17836728	chr17_SREBF1-:E030:upstream	chr17	17824628	17824629	17-17727943
chr17	17823663	17836728	chr17_SREBF1-:E030:upstream	chr17	17824728	17824729	17-17728043
chr17	17823663	17836728	chr17_SREBF1-:E030:upstream	chr17	17825259	17825260	17-17728574
chr17	17823663	17836728	chr17_SREBF1-:E030:upstream	chr17	17825668	17825669	17-17728983
chr17	17823663	17836728	chr17_SREBF1-:E030:upstream	chr17	17827885	17827886	17-17731200
chr17	17823663	17836728	chr17_SREBF1-:E030:upstream	chr17	17828336	17828337	17-17731651
chr17	17823663	17836728	chr17_SREBF1-:E030:upstream	chr17	17829004	17829005	17-17732319
chr17	17823663	17836728	chr17_SREBF1-:E030:upstream	chr17	17830445	17830446	17-17733760
chr17	17823663	17836728	chr17_SREBF1-:E030:upstream	chr17	17830511	17830512	17-17733826
chr17	17823663	17836728	chr17_SREBF1-:E030:upstream	chr17	17830619	17830620	17-17733934
chr17	17823663	17836728	chr17_SREBF1-:E030:upstream	chr17	17831425	17831426	17-17734740
chr17	17823663	17836728	chr17_SREBF1-:E030:upstream	chr17	17832937	17832938	17-17736252
chr17	17823663	17836728	chr17_SREBF1-:E030:upstream	chr17	17833943	17833944	17-17737258
chr17	4034291	4042430	chr17_ZZEF1-:E021:upstream	chr17	4034920	4034921	17-3938215
chr17	4034291	4042430	chr17_ZZEF1-:E021:upstream	chr17	4035968	4035969	17-3939263
chr17	4034291	4042430	chr17_ZZEF1-:E021:upstream	chr17	4036337	4036338	17-3939632
chr17	4034291	4042430	chr17_ZZEF1-:E021:upstream	chr17	4038101	4038102	17-3941396
chr17	4034291	4042430	chr17_ZZEF1-:E021:upstream	chr17	4041473	4041474	17-3944768
chr1	50970496	50973894	chr1_CDKN2C+:E004:upstream	chr1	50972692	50972693	1-51438365
chr1	50970496	50973894	chr1_CDKN2C+:E004:upstream	chr1	50973208	50973209	1-51438881
chr1	39084437	39105380	chr1_MACF1+:E007:upstream	chr1	39084948	39084949	1-39550621
chr1	39084437	39105380	chr1_MACF1+:E007:upstream	chr1	39085815	39085816	1-39551488
chr1	39084437	39105380	chr1_MACF1+:E007:upstream	chr1	39087290	39087291	1-39552963
chr1	39084437	39105380	chr1_MACF1+:E007:upstream	chr1	39088361	39088362	1-39554034
chr1	39084437	39105380	chr1_MACF1+:E007:upstream	chr1	39094577	39094578	1-39560250
chr1	39084437	39105380	chr1_MACF1+:E007:upstream	chr1	39096954	39096955	1-39562627
chr1	39084437	39105380	chr1_MACF1+:E007:upstream	chr1	39099257	39099258	1-39564930
chr1	39084437	39105380	chr1_MACF1+:E007:upstream	chr1	39101093	39101094	1-39566766
chr1	39084437	39105380	chr1_MACF1+:E007:upstream	chr1	39103898	39103899	1-39569571
chr1	39159019	39204303	chr1_MACF1+:E009:upstream	chr1	39160969	39160970	1-39626642
chr1	39159019	39204303	chr1_MACF1+:E009:upstream	chr1	39162738	39162739	1-39628411
chr1	39159019	39204303	chr1_MACF1+:E009:upstream	chr1	39163207	39163208	1-39628880
chr1	39159019	39204303	chr1_MACF1+:E009:upstream	chr1	39163389	39163390	1-39629062
chr1	39159019	39204303	chr1_MACF1+:E009:upstream	chr1	39165624	39165625	1-39631297
chr1	39159019	39204303	chr1_MACF1+:E009:upstream	chr1	39171228	39171229	1-39636901
chr1	39159019	39204303	chr1_MACF1+:E009:upstream	chr1	39171632	39171633	1-39637305
chr1	39159019	39204303	chr1_MACF1+:E009:upstream	chr1	39173980	39173981	1-39639653
chr1	39159019	39204303	chr1_MACF1+:E009:upstream	chr1	39174071	39174072	1-39639744
chr1	39159019	39204303	chr1_MACF1+:E009:upstream	chr1	39177709	39177710	1-39643382
chr1	39159019	39204303	chr1_MACF1+:E009:upstream	chr1	39177791	39177792	1-39643464
chr1	39159019	39204303	chr1_MACF1+:E009:upstream	chr1	39178039	39178040	1-39643712
chr1	39159019	39204303	chr1_MACF1+:E009:upstream	chr1	39181114	39181115	1-39646787
chr1	39159019	39204303	chr1_MACF1+:E009:upstream	chr1	39181365	39181366	1-39647038
chr1	39159019	39204303	chr1_MACF1+:E009:upstream	chr1	39181947	39181948	1-39647620
chr1	39159019	39204303	chr1_MACF1+:E009:upstream	chr1	39183525	39183526	1-39649198
chr1	39159019	39204303	chr1_MACF1+:E009:upstream	chr1	39187091	39187092	1-39652764
chr1	39159019	39204303	chr1_MACF1+:E009:upstream	chr1	39188321	39188322	1-39653994
chr1	39159019	39204303	chr1_MACF1+:E009:upstream	chr1	39188699	39188700	1-39654372
chr1	39159019	39204303	chr1_MACF1+:E009:upstream	chr1	39190728	39190729	1-39656401
chr1	39159019	39204303	chr1_MACF1+:E009:upstream	chr1	39195174	39195175	1-39660847
chr1	39159019	39204303	chr1_MACF1+:E009:upstream	chr1	39196835	39196836	1-39662508
chr1	39159019	39204303	chr1_MACF1+:E009:upstream	chr1	39196929	39196930	1-39662602
chr1	39159019	39204303	chr1_MACF1+:E009:upstream	chr1	39196945	39196946	1-39662618
chr1	39159019	39204303	chr1_MACF1+:E009:upstream	chr1	39199009	39199010	1-39664682
chr1	39159019	39204303	chr1_MACF1+:E009:upstream	chr1	39202342	39202343	1-39668015
chr1	39159019	39204303	chr1_MACF1+:E009:upstream	chr1	39203009	39203010	1-39668682
chr1	39159019	39204303	chr1_MACF1+:E009:upstream	chr1	39203864	39203865	1-39669537
chr1	39282373	39283190	chr1_MACF1+:E021:upstream	chr1	39282598	39282599	1-39748271
chr1	39282373	39283190	chr1_MACF1+:E021:upstream	chr1	39282866	39282867	1-39748539
chr1	39282373	39283190	chr1_MACF1+:E021:upstream	chr1	39282989	39282990	1-39748662
chr1	39292842	39293459	chr1_MACF1+:E031:upstream	chr1	39292961	39292962	1-39758634
chr1	39292842	39293459	chr1_MACF1+:E031:upstream	chr1	39293282	39293283	1-39758955
chr1	39292842	39293459	chr1_MACF1+:E031:upstream	chr1	39293320	39293321	1-39758993
chr1	39295881	39297621	chr1_MACF1+:E034:upstream	chr1	39296530	39296531	1-39762203
chr1	39295881	39297621	chr1_MACF1+:E034:upstream	chr1	39297216	39297217	1-39762889
chr1	39295881	39297621	chr1_MACF1+:E034:upstream	chr1	39297569	39297570	1-39763242
chr1	39337330	39340503	chr1_MACF1+:E053:upstream	chr1	39337894	39337895	1-39803567
chr1	39340952	39346978	chr1_MACF1+:E055:upstream	chr1	39341345	39341346	1-39807018
chr1	39340952	39346978	chr1_MACF1+:E055:upstream	chr1	39341785	39341786	1-39807458
chr1	39340952	39346978	chr1_MACF1+:E055:upstream	chr1	39343611	39343612	1-39809284
chr1	39340952	39346978	chr1_MACF1+:E055:upstream	chr1	39345532	39345533	1-39811205
chr1	39340952	39346978	chr1_MACF1+:E055:upstream	chr1	39346761	39346762	1-39812434
chr1	39340952	39346978	chr1_MACF1+:E055:upstream	chr1	39346845	39346846	1-39812518
chr1	39351017	39353008	chr1_MACF1+:E059:upstream	chr1	39351268	39351269	1-39816941
chr1	39351017	39353008	chr1_MACF1+:E059:upstream	chr1	39352379	39352380	1-39818052
chr1	39353230	39357376	chr1_MACF1+:E060:upstream	chr1	39353830	39353831	1-39819503
chr1	39353230	39357376	chr1_MACF1+:E060:upstream	chr1	39354465	39354466	1-39820138
chr1	39353230	39357376	chr1_MACF1+:E060:upstream	chr1	39354637	39354638	1-39820310
chr1	39353230	39357376	chr1_MACF1+:E060:upstream	chr1	39355253	39355254	1-39820926
chr1	39353230	39357376	chr1_MACF1+:E060:upstream	chr1	39355290	39355291	1-39820963
chr1	39353230	39357376	chr1_MACF1+:E060:upstream	chr1	39356008	39356009	1-39821681
chr1	39353230	39357376	chr1_MACF1+:E060:upstream	chr1	39356064	39356065	1-39821737
chr1	39358872	39359142	chr1_MACF1+:E062:upstream	chr1	39359045	39359046	1-39824718
chr1	39359263	39360794	chr1_MACF1+:E063:upstream	chr1	39359765	39359766	1-39825438
chr1	39359263	39360794	chr1_MACF1+:E063:upstream	chr1	39360332	39360333	1-39826005
chr1	39368313	39370031	chr1_MACF1+:E066:upstream	chr1	39368944	39368945	1-39834617
chr1	39368313	39370031	chr1_MACF1+:E066:upstream	chr1	39369867	39369868	1-39835540
chr1	39382151	39385435	chr1_MACF1+:E072:upstream	chr1	39382674	39382675	1-39848347
chr1	39385928	39387188	chr1_MACF1+:E074:upstream	chr1	39386469	39386470	1-39852142
chr1	39388657	39422375	chr1_MACF1+:E075:upstream	chr1	39389504	39389505	1-39855177
chr1	39388657	39422375	chr1_MACF1+:E075:upstream	chr1	39391519	39391520	1-39857192
chr1	39388657	39422375	chr1_MACF1+:E075:upstream	chr1	39393121	39393122	1-39858794
chr1	39388657	39422375	chr1_MACF1+:E075:upstream	chr1	39393274	39393275	1-39858947
chr1	39388657	39422375	chr1_MACF1+:E075:upstream	chr1	39394265	39394266	1-39859938
chr1	39388657	39422375	chr1_MACF1+:E075:upstream	chr1	39397542	39397543	1-39863215
chr1	39388657	39422375	chr1_MACF1+:E075:upstream	chr1	39401382	39401383	1-39867055
chr1	39388657	39422375	chr1_MACF1+:E075:upstream	chr1	39405120	39405121	1-39870793
chr1	39388657	39422375	chr1_MACF1+:E075:upstream	chr1	39408866	39408867	1-39874539
chr1	39388657	39422375	chr1_MACF1+:E075:upstream	chr1	39414646	39414647	1-39880319
chr1	39388657	39422375	chr1_MACF1+:E075:upstream	chr1	39415367	39415368	1-39881040
chr1	39388657	39422375	chr1_MACF1+:E075:upstream	chr1	39415795	39415796	1-39881468
chr1	39388657	39422375	chr1_MACF1+:E075:upstream	chr1	39418760	39418761	1-39884433
chr1	39388657	39422375	chr1_MACF1+:E075:upstream	chr1	39420090	39420091	1-39885763
chr1	39388657	39422375	chr1_MACF1+:E075:upstream	chr1	39421100	39421101	1-39886773
chr1	39422899	39424029	chr1_MACF1+:E077:upstream	chr1	39424004	39424005	1-39889677
chr1	39424193	39427456	chr1_MACF1+:E078:upstream	chr1	39427101	39427102	1-39892774
chr1	39424193	39427456	chr1_MACF1+:E078:upstream	chr1	39427420	39427421	1-39893093
chr1	39429325	39429828	chr1_MACF1+:E081:upstream	chr1	39429787	39429788	1-39895460
chr1	39436489	39437778	chr1_MACF1+:E088:upstream	chr1	39437456	39437457	1-39903129
chr1	39438007	39439275	chr1_MACF1+:E089:upstream	chr1	39438939	39438940	1-39904612
chr1	39439499	39441004	chr1_MACF1+:E090:upstream	chr1	39439915	39439916	1-39905588
chr1	39439499	39441004	chr1_MACF1+:E090:upstream	chr1	39440200	39440201	1-39905873
chr1	39442910	39443447	chr1_MACF1+:E096:upstream	chr1	39443053	39443054	1-39908726
chr1	39443573	39444663	chr1_MACF1+:E097:upstream	chr1	39443882	39443883	1-39909555
chr1	39444834	39447433	chr1_MACF1+:E098:upstream	chr1	39445328	39445329	1-39911001
chr1	39447586	39447693	chr1_MACF1+:E099:upstream	chr1	39447678	39447679	1-39913351
chr1	39448151	39448595	chr1_MACF1+:E101:upstream	chr1	39448417	39448418	1-39914090
chr1	39448762	39451053	chr1_MACF1+:E102:upstream	chr1	39449536	39449537	1-39915209
chr1	39455096	39458371	chr1_MACF1+:E107:upstream	chr1	39456138	39456139	1-39921811
chr1	39455096	39458371	chr1_MACF1+:E107:upstream	chr1	39456753	39456754	1-39922426
chr1	39455096	39458371	chr1_MACF1+:E107:upstream	chr1	39457211	39457212	1-39922884
chr1	39455096	39458371	chr1_MACF1+:E107:upstream	chr1	39458059	39458060	1-39923732
chr1	39458489	39459087	chr1_MACF1+:E108:upstream	chr1	39458725	39458726	1-39924398
chr1	39462036	39463613	chr1_MACF1+:E111:upstream	chr1	39463311	39463312	1-39928984
chr1	39462036	39463613	chr1_MACF1+:E111:upstream	chr1	39463567	39463568	1-39929240
chr1	39469614	39479799	chr1_MACF1+:E115:upstream	chr1	39472023	39472024	1-39937696
chr1	39469614	39479799	chr1_MACF1+:E115:upstream	chr1	39472584	39472585	1-39938257
chr1	39469614	39479799	chr1_MACF1+:E115:upstream	chr1	39474550	39474551	1-39940223
chr1	39469614	39479799	chr1_MACF1+:E115:upstream	chr1	39474826	39474827	1-39940499
chr1	39469614	39479799	chr1_MACF1+:E115:upstream	chr1	39476624	39476625	1-39942297
chr1	39469614	39479799	chr1_MACF1+:E115:upstream	chr1	39478507	39478508	1-39944180
chr1	39469614	39479799	chr1_MACF1+:E115:upstream	chr1	39478576	39478577	1-39944249
chr1	39469614	39479799	chr1_MACF1+:E115:upstream	chr1	39479095	39479096	1-39944768
chr1	39469614	39479799	chr1_MACF1+:E115:upstream	chr1	39479624	39479625	1-39945297
chr1	39481029	39484602	chr1_MACF1+:E117:upstream	chr1	39482551	39482552	1-39948224
chr1	39481029	39484602	chr1_MACF1+:E117:upstream	chr1	39482666	39482667	1-39948339
chr1	39481029	39484602	chr1_MACF1+:E117:upstream	chr1	39483068	39483069	1-39948741
chr1	39481029	39484602	chr1_MACF1+:E117:upstream	chr1	39484407	39484408	1-39950080
chr2	190687316	190690246	chr2_NAB1+:E027:upstream	chr2	190687430	190687431	2-191552157
chr2	27440507	27440653	chr2_NRBP1+:E021:upstream	chr2	27440548	27440549	2-27663416
chr2	65104805	65129894	chr2_RAB1A-:E006:upstream	chr2	65108898	65108899	2-65336033
chr2	65104805	65129894	chr2_RAB1A-:E006:upstream	chr2	65111287	65111288	2-65338422
chr2	65104805	65129894	chr2_RAB1A-:E006:upstream	chr2	65118596	65118597	2-65345731
chr2	65104805	65129894	chr2_RAB1A-:E006:upstream	chr2	65128609	65128610	2-65355744
chr3	152396223	152414942	chr3_MBNL1+:E024:upstream	chr3	152399514	152399515	3-152117304
chr3	152396223	152414942	chr3_MBNL1+:E024:upstream	chr3	152402186	152402187	3-152119976
chr3	152396223	152414942	chr3_MBNL1+:E024:upstream	chr3	152407968	152407969	3-152125758
chr3	152396223	152414942	chr3_MBNL1+:E024:upstream	chr3	152412200	152412201	3-152129990
chr3	12301848	12303492	chr3_PPARG+:E006:upstream	chr3	12302091	12302092	3-12343591
chr3	12301848	12303492	chr3_PPARG+:E006:upstream	chr3	12303136	12303137	3-12344636
chr3	12301848	12303492	chr3_PPARG+:E006:upstream	chr3	12303230	12303231	3-12344730
chr3	23271165	23332170	chr3_UBE2E2+:E007:upstream	chr3	23271421	23271422	3-23312913
chr3	23271165	23332170	chr3_UBE2E2+:E007:upstream	chr3	23272238	23272239	3-23313730
chr3	23271165	23332170	chr3_UBE2E2+:E007:upstream	chr3	23272284	23272285	3-23313776
chr3	23271165	23332170	chr3_UBE2E2+:E007:upstream	chr3	23272598	23272599	3-23314090
chr3	23271165	23332170	chr3_UBE2E2+:E007:upstream	chr3	23273047	23273048	3-23314539
chr3	23271165	23332170	chr3_UBE2E2+:E007:upstream	chr3	23273255	23273256	3-23314747
chr3	23271165	23332170	chr3_UBE2E2+:E007:upstream	chr3	23273372	23273373	3-23314864
chr3	23271165	23332170	chr3_UBE2E2+:E007:upstream	chr3	23273706	23273707	3-23315198
chr3	23271165	23332170	chr3_UBE2E2+:E007:upstream	chr3	23274375	23274376	3-23315867
chr3	23271165	23332170	chr3_UBE2E2+:E007:upstream	chr3	23276432	23276433	3-23317924
chr3	23271165	23332170	chr3_UBE2E2+:E007:upstream	chr3	23276652	23276653	3-23318144
chr3	23271165	23332170	chr3_UBE2E2+:E007:upstream	chr3	23280428	23280429	3-23321920
chr3	23271165	23332170	chr3_UBE2E2+:E007:upstream	chr3	23281134	23281135	3-23322626
chr3	23271165	23332170	chr3_UBE2E2+:E007:upstream	chr3	23281659	23281660	3-23323151
chr3	23271165	23332170	chr3_UBE2E2+:E007:upstream	chr3	23283528	23283529	3-23325020
chr3	23271165	23332170	chr3_UBE2E2+:E007:upstream	chr3	23284498	23284499	3-23325990
chr3	23271165	23332170	chr3_UBE2E2+:E007:upstream	chr3	23286750	23286751	3-23328242
chr3	23271165	23332170	chr3_UBE2E2+:E007:upstream	chr3	23288303	23288304	3-23329795
chr3	23271165	23332170	chr3_UBE2E2+:E007:upstream	chr3	23289443	23289444	3-23330935
chr3	23271165	23332170	chr3_UBE2E2+:E007:upstream	chr3	23290460	23290461	3-23331952
chr3	23271165	23332170	chr3_UBE2E2+:E007:upstream	chr3	23291292	23291293	3-23332784
chr3	23271165	23332170	chr3_UBE2E2+:E007:upstream	chr3	23292112	23292113	3-23333604
chr3	23271165	23332170	chr3_UBE2E2+:E007:upstream	chr3	23294958	23294959	3-23336450
chr3	23271165	23332170	chr3_UBE2E2+:E007:upstream	chr3	23295488	23295489	3-23336980
chr3	23271165	23332170	chr3_UBE2E2+:E007:upstream	chr3	23295729	23295730	3-23337221
chr3	23271165	23332170	chr3_UBE2E2+:E007:upstream	chr3	23296313	23296314	3-23337805
chr3	23271165	23332170	chr3_UBE2E2+:E007:upstream	chr3	23296519	23296520	3-23338011
chr3	23271165	23332170	chr3_UBE2E2+:E007:upstream	chr3	23296551	23296552	3-23338043
chr3	23271165	23332170	chr3_UBE2E2+:E007:upstream	chr3	23297614	23297615	3-23339106
chr3	23271165	23332170	chr3_UBE2E2+:E007:upstream	chr3	23298995	23298996	3-23340487
chr3	23271165	23332170	chr3_UBE2E2+:E007:upstream	chr3	23299201	23299202	3-23340693
chr3	23271165	23332170	chr3_UBE2E2+:E007:upstream	chr3	23299376	23299377	3-23340868
chr3	23271165	23332170	chr3_UBE2E2+:E007:upstream	chr3	23301865	23301866	3-23343357
chr3	23271165	23332170	chr3_UBE2E2+:E007:upstream	chr3	23301884	23301885	3-23343376
chr3	23271165	23332170	chr3_UBE2E2+:E007:upstream	chr3	23302891	23302892	3-23344383
chr3	23271165	23332170	chr3_UBE2E2+:E007:upstream	chr3	23303087	23303088	3-23344579
chr3	23271165	23332170	chr3_UBE2E2+:E007:upstream	chr3	23304370	23304371	3-23345862
chr3	23271165	23332170	chr3_UBE2E2+:E007:upstream	chr3	23304554	23304555	3-23346046
chr3	23271165	23332170	chr3_UBE2E2+:E007:upstream	chr3	23305040	23305041	3-23346532
chr3	23271165	23332170	chr3_UBE2E2+:E007:upstream	chr3	23305303	23305304	3-23346795
chr3	23271165	23332170	chr3_UBE2E2+:E007:upstream	chr3	23306190	23306191	3-23347682
chr3	23271165	23332170	chr3_UBE2E2+:E007:upstream	chr3	23308283	23308284	3-23349775
chr3	23271165	23332170	chr3_UBE2E2+:E007:upstream	chr3	23308974	23308975	3-23350466
chr3	23271165	23332170	chr3_UBE2E2+:E007:upstream	chr3	23311077	23311078	3-23352569
chr3	23271165	23332170	chr3_UBE2E2+:E007:upstream	chr3	23312631	23312632	3-23354123
chr3	23271165	23332170	chr3_UBE2E2+:E007:upstream	chr3	23313146	23313147	3-23354638
chr3	23271165	23332170	chr3_UBE2E2+:E007:upstream	chr3	23315799	23315800	3-23357291
chr3	23271165	23332170	chr3_UBE2E2+:E007:upstream	chr3	23318593	23318594	3-23360085
chr3	23271165	23332170	chr3_UBE2E2+:E007:upstream	chr3	23319135	23319136	3-23360627
chr3	23271165	23332170	chr3_UBE2E2+:E007:upstream	chr3	23319971	23319972	3-23361463
chr3	23271165	23332170	chr3_UBE2E2+:E007:upstream	chr3	23322366	23322367	3-23363858
chr3	23271165	23332170	chr3_UBE2E2+:E007:upstream	chr3	23327848	23327849	3-23369340
chr3	23271165	23332170	chr3_UBE2E2+:E007:upstream	chr3	23327868	23327869	3-23369360
chr3	23271165	23332170	chr3_UBE2E2+:E007:upstream	chr3	23328252	23328253	3-23369744
chr3	23271165	23332170	chr3_UBE2E2+:E007:upstream	chr3	23330144	23330145	3-23371636
chr3	23271165	23332170	chr3_UBE2E2+:E007:upstream	chr3	23332154	23332155	3-23373646
chr4	88805051	88822977	chr4_FAM13A-:E020:upstream	chr4	88819742	88819743	4-89740894
chr5	102808230	102865776	chr5_PAM+:E006:upstream	chr5	102809692	102809693	5-102145397
chr5	102808230	102865776	chr5_PAM+:E006:upstream	chr5	102812787	102812788	5-102148492
chr5	102808230	102865776	chr5_PAM+:E006:upstream	chr5	102814090	102814091	5-102149795
chr5	102808230	102865776	chr5_PAM+:E006:upstream	chr5	102814189	102814190	5-102149894
chr5	102808230	102865776	chr5_PAM+:E006:upstream	chr5	102815969	102815970	5-102151674
chr5	102808230	102865776	chr5_PAM+:E006:upstream	chr5	102816382	102816383	5-102152087
chr5	102808230	102865776	chr5_PAM+:E006:upstream	chr5	102817709	102817710	5-102153414
chr5	102808230	102865776	chr5_PAM+:E006:upstream	chr5	102819905	102819906	5-102155610
chr5	102808230	102865776	chr5_PAM+:E006:upstream	chr5	102822913	102822914	5-102158618
chr5	102808230	102865776	chr5_PAM+:E006:upstream	chr5	102822941	102822942	5-102158646
chr5	102808230	102865776	chr5_PAM+:E006:upstream	chr5	102824082	102824083	5-102159787
chr5	102808230	102865776	chr5_PAM+:E006:upstream	chr5	102824767	102824768	5-102160472
chr5	102808230	102865776	chr5_PAM+:E006:upstream	chr5	102825080	102825081	5-102160785
chr5	102808230	102865776	chr5_PAM+:E006:upstream	chr5	102825406	102825407	5-102161111
chr5	102808230	102865776	chr5_PAM+:E006:upstream	chr5	102826046	102826047	5-102161751
chr5	102808230	102865776	chr5_PAM+:E006:upstream	chr5	102826206	102826207	5-102161911
chr5	102808230	102865776	chr5_PAM+:E006:upstream	chr5	102826312	102826313	5-102162017
chr5	102808230	102865776	chr5_PAM+:E006:upstream	chr5	102826321	102826322	5-102162026
chr5	102808230	102865776	chr5_PAM+:E006:upstream	chr5	102826921	102826922	5-102162626
chr5	102808230	102865776	chr5_PAM+:E006:upstream	chr5	102827424	102827425	5-102163129
chr5	102808230	102865776	chr5_PAM+:E006:upstream	chr5	102827469	102827470	5-102163174
chr5	102808230	102865776	chr5_PAM+:E006:upstream	chr5	102827595	102827596	5-102163300
chr5	102808230	102865776	chr5_PAM+:E006:upstream	chr5	102827620	102827621	5-102163325
chr5	102808230	102865776	chr5_PAM+:E006:upstream	chr5	102828076	102828077	5-102163781
chr5	102808230	102865776	chr5_PAM+:E006:upstream	chr5	102828413	102828414	5-102164118
chr5	102808230	102865776	chr5_PAM+:E006:upstream	chr5	102829327	102829328	5-102165032
chr5	102808230	102865776	chr5_PAM+:E006:upstream	chr5	102829467	102829468	5-102165172
chr5	102808230	102865776	chr5_PAM+:E006:upstream	chr5	102829609	102829610	5-102165314
chr5	102808230	102865776	chr5_PAM+:E006:upstream	chr5	102829866	102829867	5-102165571
chr5	102808230	102865776	chr5_PAM+:E006:upstream	chr5	102830470	102830471	5-102166175
chr5	102808230	102865776	chr5_PAM+:E006:upstream	chr5	102831927	102831928	5-102167632
chr5	102808230	102865776	chr5_PAM+:E006:upstream	chr5	102832003	102832004	5-102167708
chr5	102808230	102865776	chr5_PAM+:E006:upstream	chr5	102832851	102832852	5-102168556
chr5	102808230	102865776	chr5_PAM+:E006:upstream	chr5	102833179	102833180	5-102168884
chr5	102808230	102865776	chr5_PAM+:E006:upstream	chr5	102834089	102834090	5-102169794
chr5	102808230	102865776	chr5_PAM+:E006:upstream	chr5	102834175	102834176	5-102169880
chr5	102808230	102865776	chr5_PAM+:E006:upstream	chr5	102834199	102834200	5-102169904
chr5	102808230	102865776	chr5_PAM+:E006:upstream	chr5	102856010	102856011	5-102191715
chr5	102808230	102865776	chr5_PAM+:E006:upstream	chr5	102860604	102860605	5-102196309
chr5	102961659	102974117	chr5_PAM+:E023:upstream	chr5	102963011	102963012	5-102298716
chr5	102961659	102974117	chr5_PAM+:E023:upstream	chr5	102963646	102963647	5-102299351
chr5	102961659	102974117	chr5_PAM+:E023:upstream	chr5	102964362	102964363	5-102300067
chr5	102961659	102974117	chr5_PAM+:E023:upstream	chr5	102965653	102965654	5-102301358
chr5	102961659	102974117	chr5_PAM+:E023:upstream	chr5	102965663	102965664	5-102301368
chr5	102961659	102974117	chr5_PAM+:E023:upstream	chr5	102965758	102965759	5-102301463
chr5	102961659	102974117	chr5_PAM+:E023:upstream	chr5	102966232	102966233	5-102301937
chr5	102961659	102974117	chr5_PAM+:E023:upstream	chr5	102966546	102966547	5-102302251
chr5	102961659	102974117	chr5_PAM+:E023:upstream	chr5	102966914	102966915	5-102302619
chr5	102961659	102974117	chr5_PAM+:E023:upstream	chr5	102968011	102968012	5-102303716
chr5	102961659	102974117	chr5_PAM+:E023:upstream	chr5	102968791	102968792	5-102304496
chr5	102961659	102974117	chr5_PAM+:E023:upstream	chr5	102968851	102968852	5-102304556
chr5	102961659	102974117	chr5_PAM+:E023:upstream	chr5	102969360	102969361	5-102305065
chr5	102961659	102974117	chr5_PAM+:E023:upstream	chr5	102969923	102969924	5-102305628
chr5	102961659	102974117	chr5_PAM+:E023:upstream	chr5	102970356	102970357	5-102306061
chr5	102961659	102974117	chr5_PAM+:E023:upstream	chr5	102970617	102970618	5-102306322
chr5	102961659	102974117	chr5_PAM+:E023:upstream	chr5	102971074	102971075	5-102306779
chr5	102961659	102974117	chr5_PAM+:E023:upstream	chr5	102971766	102971767	5-102307471
chr5	102961659	102974117	chr5_PAM+:E023:upstream	chr5	102971887	102971888	5-102307592
chr5	102974435	102987519	chr5_PAM+:E024:upstream	chr5	102974461	102974462	5-102310166
chr5	102974435	102987519	chr5_PAM+:E024:upstream	chr5	102976833	102976834	5-102312538
chr5	102974435	102987519	chr5_PAM+:E024:upstream	chr5	102977978	102977979	5-102313683
chr5	102974435	102987519	chr5_PAM+:E024:upstream	chr5	102978234	102978235	5-102313939
chr5	102974435	102987519	chr5_PAM+:E024:upstream	chr5	102978352	102978353	5-102314057
chr5	102974435	102987519	chr5_PAM+:E024:upstream	chr5	102978522	102978523	5-102314227
chr5	102974435	102987519	chr5_PAM+:E024:upstream	chr5	102980901	102980902	5-102316606
chr5	102974435	102987519	chr5_PAM+:E024:upstream	chr5	102981337	102981338	5-102317042
chr5	102974435	102987519	chr5_PAM+:E024:upstream	chr5	102981412	102981413	5-102317117
chr5	102974435	102987519	chr5_PAM+:E024:upstream	chr5	102981713	102981714	5-102317418
chr5	102974435	102987519	chr5_PAM+:E024:upstream	chr5	102983269	102983270	5-102318974
chr5	102974435	102987519	chr5_PAM+:E024:upstream	chr5	102983332	102983333	5-102319037
chr5	102974435	102987519	chr5_PAM+:E024:upstream	chr5	102986200	102986201	5-102321905
chr5	102974435	102987519	chr5_PAM+:E024:upstream	chr5	102986743	102986744	5-102322448
chr6	126348874	126433552	chr6_CENPW+:E008:upstream	chr6	126353207	126353208	6-126674354
chr6	126348874	126433552	chr6_CENPW+:E008:upstream	chr6	126357121	126357122	6-126678268
chr6	126348874	126433552	chr6_CENPW+:E008:upstream	chr6	126357959	126357960	6-126679106
chr6	126348874	126433552	chr6_CENPW+:E008:upstream	chr6	126359342	126359343	6-126680489
chr6	126348874	126433552	chr6_CENPW+:E008:upstream	chr6	126362447	126362448	6-126683594
chr6	126348874	126433552	chr6_CENPW+:E008:upstream	chr6	126364680	126364681	6-126685827
chr6	126348874	126433552	chr6_CENPW+:E008:upstream	chr6	126365366	126365367	6-126686513
chr6	126348874	126433552	chr6_CENPW+:E008:upstream	chr6	126377572	126377573	6-126698719
chr6	126348874	126433552	chr6_CENPW+:E008:upstream	chr6	126380820	126380821	6-126701967
chr6	126348874	126433552	chr6_CENPW+:E008:upstream	chr6	126382243	126382244	6-126703390
chr6	126348874	126433552	chr6_CENPW+:E008:upstream	chr6	126383648	126383649	6-126704795
chr6	126348874	126433552	chr6_CENPW+:E008:upstream	chr6	126391100	126391101	6-126712247
chr6	126348874	126433552	chr6_CENPW+:E008:upstream	chr6	126395917	126395918	6-126717064
chr6	126348874	126433552	chr6_CENPW+:E008:upstream	chr6	126405148	126405149	6-126726295
chr6	126348874	126433552	chr6_CENPW+:E008:upstream	chr6	126406783	126406784	6-126727930
chr6	126348874	126433552	chr6_CENPW+:E008:upstream	chr6	126406803	126406804	6-126727950
chr6	126348874	126433552	chr6_CENPW+:E008:upstream	chr6	126422940	126422941	6-126744087
chr6	126348874	126433552	chr6_CENPW+:E008:upstream	chr6	126423929	126423930	6-126745076
chr6	126348874	126433552	chr6_CENPW+:E008:upstream	chr6	126427346	126427347	6-126748493
chr6	126348874	126433552	chr6_CENPW+:E008:upstream	chr6	126430774	126430775	6-126751921
chr6	126348874	126433552	chr6_CENPW+:E008:upstream	chr6	126431651	126431652	6-126752798
chr6	126348874	126433552	chr6_CENPW+:E008:upstream	chr6	126431727	126431728	6-126752874
chr6	126348874	126433552	chr6_CENPW+:E008:upstream	chr6	126431737	126431738	6-126752884
chr6	126348874	126433552	chr6_CENPW+:E008:upstream	chr6	126432417	126432418	6-126753564
chr6	126433624	126480579	chr6_CENPW+:E009:upstream	chr6	126433908	126433909	6-126755055
chr6	126433624	126480579	chr6_CENPW+:E009:upstream	chr6	126434495	126434496	6-126755642
chr6	126433624	126480579	chr6_CENPW+:E009:upstream	chr6	126437393	126437394	6-126758540
chr6	126433624	126480579	chr6_CENPW+:E009:upstream	chr6	126437644	126437645	6-126758791
chr6	126433624	126480579	chr6_CENPW+:E009:upstream	chr6	126437886	126437887	6-126759033
chr6	126433624	126480579	chr6_CENPW+:E009:upstream	chr6	126438440	126438441	6-126759587
chr6	126433624	126480579	chr6_CENPW+:E009:upstream	chr6	126439847	126439848	6-126760994
chr6	126433624	126480579	chr6_CENPW+:E009:upstream	chr6	126440081	126440082	6-126761228
chr6	126433624	126480579	chr6_CENPW+:E009:upstream	chr6	126443043	126443044	6-126764190
chr6	126433624	126480579	chr6_CENPW+:E009:upstream	chr6	126446364	126446365	6-126767511
chr6	126433624	126480579	chr6_CENPW+:E009:upstream	chr6	126446453	126446454	6-126767600
chr6	126433624	126480579	chr6_CENPW+:E009:upstream	chr6	126449877	126449878	6-126771024
chr6	126433624	126480579	chr6_CENPW+:E009:upstream	chr6	126449996	126449997	6-126771143
chr6	126433624	126480579	chr6_CENPW+:E009:upstream	chr6	126450540	126450541	6-126771687
chr6	126433624	126480579	chr6_CENPW+:E009:upstream	chr6	126452340	126452341	6-126773487
chr6	126433624	126480579	chr6_CENPW+:E009:upstream	chr6	126452433	126452434	6-126773580
chr6	126433624	126480579	chr6_CENPW+:E009:upstream	chr6	126454947	126454948	6-126776094
chr6	126433624	126480579	chr6_CENPW+:E009:upstream	chr6	126457453	126457454	6-126778600
chr6	126433624	126480579	chr6_CENPW+:E009:upstream	chr6	126460287	126460288	6-126781434
chr6	126433624	126480579	chr6_CENPW+:E009:upstream	chr6	126461310	126461311	6-126782457
chr6	126433624	126480579	chr6_CENPW+:E009:upstream	chr6	126463915	126463916	6-126785062
chr6	126433624	126480579	chr6_CENPW+:E009:upstream	chr6	126466960	126466961	6-126788107
chr6	126433624	126480579	chr6_CENPW+:E009:upstream	chr6	126467997	126467998	6-126789144
chr6	126433624	126480579	chr6_CENPW+:E009:upstream	chr6	126468325	126468326	6-126789472
chr6	126433624	126480579	chr6_CENPW+:E009:upstream	chr6	126470948	126470949	6-126792095
chr6	126433624	126480579	chr6_CENPW+:E009:upstream	chr6	126475964	126475965	6-126797111
chr6	126433624	126480579	chr6_CENPW+:E009:upstream	chr6	126479997	126479998	6-126801144
chr9	4298506	4299422	chr9_GLIS3-:E022:upstream	chr9	4298588	4298589	9-4298589
chr9	4298506	4299422	chr9_GLIS3-:E022:upstream	chr9	4298954	4298955	9-4298955
chr9	19087155	19089413	chr9_HAUS6-:E017:upstream	chr9	19087430	19087431	9-19087429
chr10	91962677	91964078	chr10_BTAF1+:E020:downstream	chr10	91962993	91962994	10-93722751
chr10	91962677	91964078	chr10_BTAF1+:E020:downstream	chr10	91963705	91963706	10-93723463
chr10	91964200	91966638	chr10_BTAF1+:E022:downstream	chr10	91964830	91964831	10-93724588
chr10	91964200	91966638	chr10_BTAF1+:E022:downstream	chr10	91966199	91966200	10-93725957
chr10	91964200	91966638	chr10_BTAF1+:E022:downstream	chr10	91966332	91966333	10-93726090
chr10	91966756	91980455	chr10_BTAF1+:E023:downstream	chr10	91967823	91967824	10-93727581
chr10	91966756	91980455	chr10_BTAF1+:E023:downstream	chr10	91967858	91967859	10-93727616
chr10	91966756	91980455	chr10_BTAF1+:E023:downstream	chr10	91969577	91969578	10-93729335
chr10	91966756	91980455	chr10_BTAF1+:E023:downstream	chr10	91970240	91970241	10-93729998
chr10	91966756	91980455	chr10_BTAF1+:E023:downstream	chr10	91970300	91970301	10-93730058
chr10	91966756	91980455	chr10_BTAF1+:E023:downstream	chr10	91970734	91970735	10-93730492
chr10	91966756	91980455	chr10_BTAF1+:E023:downstream	chr10	91970834	91970835	10-93730592
chr10	91966756	91980455	chr10_BTAF1+:E023:downstream	chr10	91971633	91971634	10-93731391
chr10	91966756	91980455	chr10_BTAF1+:E023:downstream	chr10	91971719	91971720	10-93731477
chr10	91966756	91980455	chr10_BTAF1+:E023:downstream	chr10	91971859	91971860	10-93731617
chr10	91966756	91980455	chr10_BTAF1+:E023:downstream	chr10	91972528	91972529	10-93732286
chr10	91966756	91980455	chr10_BTAF1+:E023:downstream	chr10	91972983	91972984	10-93732741
chr10	91966756	91980455	chr10_BTAF1+:E023:downstream	chr10	91973569	91973570	10-93733327
chr10	91966756	91980455	chr10_BTAF1+:E023:downstream	chr10	91974597	91974598	10-93734355
chr10	91966756	91980455	chr10_BTAF1+:E023:downstream	chr10	91975612	91975613	10-93735370
chr10	91966756	91980455	chr10_BTAF1+:E023:downstream	chr10	91976549	91976550	10-93736307
chr10	91966756	91980455	chr10_BTAF1+:E023:downstream	chr10	91976801	91976802	10-93736559
chr10	91966756	91980455	chr10_BTAF1+:E023:downstream	chr10	91978207	91978208	10-93737965
chr10	91966756	91980455	chr10_BTAF1+:E023:downstream	chr10	91978892	91978893	10-93738650
chr11	72722357	72726621	chr11_ARAP1-:E033:downstream	chr11	72722874	72722875	11-72433920
chr11	72722357	72726621	chr11_ARAP1-:E033:downstream	chr11	72724937	72724938	11-72435983
chr11	72722357	72726621	chr11_ARAP1-:E033:downstream	chr11	72724950	72724951	11-72435996
chr11	43854863	43855145	chr11_HSD17B12+:E018:downstream	chr11	43854884	43854885	11-43876435
chr11	65444456	65444559	chr11_NEAT1+:E002:downstream	chr11	65444507	65444508	11-65211979
chr12	27710954	27714781	chr12_MRPS35+:E002:downstream	chr12	27711302	27711303	12-27864236
chr12	27710954	27714781	chr12_MRPS35+:E002:downstream	chr12	27712294	27712295	12-27865228
chr12	27710954	27714781	chr12_MRPS35+:E002:downstream	chr12	27713035	27713036	12-27865969
chr12	27710954	27714781	chr12_MRPS35+:E002:downstream	chr12	27713494	27713495	12-27866428
chr14	91490801	91509507	chr14_PPP4R3A-:E020:downstream	chr14	91491040	91491041	14-91957385
chr14	91490801	91509507	chr14_PPP4R3A-:E020:downstream	chr14	91493878	91493879	14-91960223
chr14	91490801	91509507	chr14_PPP4R3A-:E020:downstream	chr14	91494439	91494440	14-91960784
chr14	91490801	91509507	chr14_PPP4R3A-:E020:downstream	chr14	91494527	91494528	14-91960872
chr14	91490801	91509507	chr14_PPP4R3A-:E020:downstream	chr14	91494843	91494844	14-91961188
chr14	91490801	91509507	chr14_PPP4R3A-:E020:downstream	chr14	91496181	91496182	14-91962526
chr14	91490801	91509507	chr14_PPP4R3A-:E020:downstream	chr14	91497377	91497378	14-91963722
chr14	91490801	91509507	chr14_PPP4R3A-:E020:downstream	chr14	91498529	91498530	14-91964874
chr14	91490801	91509507	chr14_PPP4R3A-:E020:downstream	chr14	91500286	91500287	14-91966631
chr14	91490801	91509507	chr14_PPP4R3A-:E020:downstream	chr14	91501321	91501322	14-91967666
chr14	91490801	91509507	chr14_PPP4R3A-:E020:downstream	chr14	91501782	91501783	14-91968127
chr14	91490801	91509507	chr14_PPP4R3A-:E020:downstream	chr14	91501968	91501969	14-91968313
chr14	91490801	91509507	chr14_PPP4R3A-:E020:downstream	chr14	91504920	91504921	14-91971265
chr14	91490801	91509507	chr14_PPP4R3A-:E020:downstream	chr14	91505238	91505239	14-91971583
chr14	91490801	91509507	chr14_PPP4R3A-:E020:downstream	chr14	91506407	91506408	14-91972752
chr15	41669957	41696076	chr15_MGA+:E013:downstream	chr15	41673343	41673344	15-41965542
chr15	41669957	41696076	chr15_MGA+:E013:downstream	chr15	41676027	41676028	15-41968226
chr15	41669957	41696076	chr15_MGA+:E013:downstream	chr15	41694212	41694213	15-41986411
chr15	75517363	75523122	chr15_PTPN9-:E009:downstream	chr15	75518317	75518318	15-75810659
chr15	75517363	75523122	chr15_PTPN9-:E009:downstream	chr15	75519257	75519258	15-75811599
chr15	75517363	75523122	chr15_PTPN9-:E009:downstream	chr15	75520132	75520133	15-75812474
chr15	75517363	75523122	chr15_PTPN9-:E009:downstream	chr15	75520546	75520547	15-75812888
chr15	75517363	75523122	chr15_PTPN9-:E009:downstream	chr15	75520811	75520812	15-75813153
chr15	75517363	75523122	chr15_PTPN9-:E009:downstream	chr15	75522046	75522047	15-75814388
chr15	75517363	75523122	chr15_PTPN9-:E009:downstream	chr15	75522330	75522331	15-75814672
chr15	75517363	75523122	chr15_PTPN9-:E009:downstream	chr15	75522362	75522363	15-75814704
chr15	41529978	41531024	chr15_RPAP1-:E018:downstream	chr15	41530124	41530125	15-41822323
chr16	29972139	29972951	chr16_TMEM219+:E012:downstream	chr16	29972748	29972749	16-29984070
chr17	67929486	67931912	chr17_BPTF+:E027:downstream	chr17	67930487	67930488	17-65926604
chr17	67959874	67963334	chr17_BPTF+:E035:downstream	chr17	67961451	67961452	17-65957568
chr17	42592161	42596534	chr17_RETREG3-:E009:downstream	chr17	42596528	42596529	17-40748547
chr17	42596626	42609087	chr17_RETREG3-:E010:downstream	chr17	42607429	42607430	17-40759448
chr17	4042567	4044225	chr17_ZZEF1-:E021:downstream	chr17	4042932	4042933	17-3946227
chr1	39084437	39105380	chr1_MACF1+:E006:downstream	chr1	39084948	39084949	1-39550621
chr1	39084437	39105380	chr1_MACF1+:E006:downstream	chr1	39085815	39085816	1-39551488
chr1	39084437	39105380	chr1_MACF1+:E006:downstream	chr1	39087290	39087291	1-39552963
chr1	39084437	39105380	chr1_MACF1+:E006:downstream	chr1	39088361	39088362	1-39554034
chr1	39084437	39105380	chr1_MACF1+:E006:downstream	chr1	39094577	39094578	1-39560250
chr1	39084437	39105380	chr1_MACF1+:E006:downstream	chr1	39096954	39096955	1-39562627
chr1	39084437	39105380	chr1_MACF1+:E006:downstream	chr1	39099257	39099258	1-39564930
chr1	39084437	39105380	chr1_MACF1+:E006:downstream	chr1	39101093	39101094	1-39566766
chr1	39084437	39105380	chr1_MACF1+:E006:downstream	chr1	39103898	39103899	1-39569571
chr1	39105716	39157947	chr1_MACF1+:E007:downstream	chr1	39106319	39106320	1-39571992
chr1	39105716	39157947	chr1_MACF1+:E007:downstream	chr1	39107546	39107547	1-39573219
chr1	39105716	39157947	chr1_MACF1+:E007:downstream	chr1	39110309	39110310	1-39575982
chr1	39105716	39157947	chr1_MACF1+:E007:downstream	chr1	39110948	39110949	1-39576621
chr1	39105716	39157947	chr1_MACF1+:E007:downstream	chr1	39112859	39112860	1-39578532
chr1	39105716	39157947	chr1_MACF1+:E007:downstream	chr1	39113313	39113314	1-39578986
chr1	39105716	39157947	chr1_MACF1+:E007:downstream	chr1	39121605	39121606	1-39587278
chr1	39105716	39157947	chr1_MACF1+:E007:downstream	chr1	39121715	39121716	1-39587388
chr1	39105716	39157947	chr1_MACF1+:E007:downstream	chr1	39123294	39123295	1-39588967
chr1	39105716	39157947	chr1_MACF1+:E007:downstream	chr1	39124736	39124737	1-39590409
chr1	39105716	39157947	chr1_MACF1+:E007:downstream	chr1	39126106	39126107	1-39591779
chr1	39105716	39157947	chr1_MACF1+:E007:downstream	chr1	39128429	39128430	1-39594102
chr1	39105716	39157947	chr1_MACF1+:E007:downstream	chr1	39130464	39130465	1-39596137
chr1	39105716	39157947	chr1_MACF1+:E007:downstream	chr1	39137082	39137083	1-39602755
chr1	39105716	39157947	chr1_MACF1+:E007:downstream	chr1	39137541	39137542	1-39603214
chr1	39105716	39157947	chr1_MACF1+:E007:downstream	chr1	39139418	39139419	1-39605091
chr1	39105716	39157947	chr1_MACF1+:E007:downstream	chr1	39144111	39144112	1-39609784
chr1	39105716	39157947	chr1_MACF1+:E007:downstream	chr1	39146567	39146568	1-39612240
chr1	39105716	39157947	chr1_MACF1+:E007:downstream	chr1	39146820	39146821	1-39612493
chr1	39105716	39157947	chr1_MACF1+:E007:downstream	chr1	39146884	39146885	1-39612557
chr1	39105716	39157947	chr1_MACF1+:E007:downstream	chr1	39148139	39148140	1-39613812
chr1	39105716	39157947	chr1_MACF1+:E007:downstream	chr1	39150609	39150610	1-39616282
chr1	39105716	39157947	chr1_MACF1+:E007:downstream	chr1	39151017	39151018	1-39616690
chr1	39105716	39157947	chr1_MACF1+:E007:downstream	chr1	39151407	39151408	1-39617080
chr1	39105716	39157947	chr1_MACF1+:E007:downstream	chr1	39152883	39152884	1-39618556
chr1	39105716	39157947	chr1_MACF1+:E007:downstream	chr1	39155284	39155285	1-39620957
chr1	39105716	39157947	chr1_MACF1+:E007:downstream	chr1	39155879	39155880	1-39621552
chr1	39105716	39157947	chr1_MACF1+:E007:downstream	chr1	39156915	39156916	1-39622588
chr1	39105716	39157947	chr1_MACF1+:E007:downstream	chr1	39157150	39157151	1-39622823
chr1	39105716	39157947	chr1_MACF1+:E007:downstream	chr1	39157634	39157635	1-39623307
chr1	39205130	39213762	chr1_MACF1+:E009:downstream	chr1	39205819	39205820	1-39671492
chr1	39205130	39213762	chr1_MACF1+:E009:downstream	chr1	39206872	39206873	1-39672545
chr1	39205130	39213762	chr1_MACF1+:E009:downstream	chr1	39208915	39208916	1-39674588
chr1	39205130	39213762	chr1_MACF1+:E009:downstream	chr1	39209649	39209650	1-39675322
chr1	39205130	39213762	chr1_MACF1+:E009:downstream	chr1	39213317	39213318	1-39678990
chr1	39205130	39213762	chr1_MACF1+:E009:downstream	chr1	39213729	39213730	1-39679402
chr1	39287561	39291911	chr1_MACF1+:E028:downstream	chr1	39290644	39290645	1-39756317
chr1	39300361	39302925	chr1_MACF1+:E035:downstream	chr1	39300368	39300369	1-39766041
chr1	39300361	39302925	chr1_MACF1+:E035:downstream	chr1	39300382	39300383	1-39766055
chr1	39300361	39302925	chr1_MACF1+:E035:downstream	chr1	39300976	39300977	1-39766649
chr1	39310999	39315514	chr1_MACF1+:E039:downstream	chr1	39311486	39311487	1-39777159
chr1	39310999	39315514	chr1_MACF1+:E039:downstream	chr1	39314129	39314130	1-39779802
chr1	39337330	39340503	chr1_MACF1+:E052:downstream	chr1	39337894	39337895	1-39803567
chr1	39340952	39346978	chr1_MACF1+:E054:downstream	chr1	39341345	39341346	1-39807018
chr1	39340952	39346978	chr1_MACF1+:E054:downstream	chr1	39341785	39341786	1-39807458
chr1	39340952	39346978	chr1_MACF1+:E054:downstream	chr1	39343611	39343612	1-39809284
chr1	39340952	39346978	chr1_MACF1+:E054:downstream	chr1	39345532	39345533	1-39811205
chr1	39340952	39346978	chr1_MACF1+:E054:downstream	chr1	39346761	39346762	1-39812434
chr1	39340952	39346978	chr1_MACF1+:E054:downstream	chr1	39346845	39346846	1-39812518
chr1	39347209	39349479	chr1_MACF1+:E056:downstream	chr1	39349287	39349288	1-39814960
chr1	39347209	39349479	chr1_MACF1+:E056:downstream	chr1	39349470	39349471	1-39815143
chr1	39353230	39357376	chr1_MACF1+:E059:downstream	chr1	39353830	39353831	1-39819503
chr1	39353230	39357376	chr1_MACF1+:E059:downstream	chr1	39354465	39354466	1-39820138
chr1	39353230	39357376	chr1_MACF1+:E059:downstream	chr1	39354637	39354638	1-39820310
chr1	39353230	39357376	chr1_MACF1+:E059:downstream	chr1	39355253	39355254	1-39820926
chr1	39353230	39357376	chr1_MACF1+:E059:downstream	chr1	39355290	39355291	1-39820963
chr1	39353230	39357376	chr1_MACF1+:E059:downstream	chr1	39356008	39356009	1-39821681
chr1	39353230	39357376	chr1_MACF1+:E059:downstream	chr1	39356064	39356065	1-39821737
chr1	39358872	39359142	chr1_MACF1+:E061:downstream	chr1	39359045	39359046	1-39824718
chr1	39359263	39360794	chr1_MACF1+:E062:downstream	chr1	39359765	39359766	1-39825438
chr1	39359263	39360794	chr1_MACF1+:E062:downstream	chr1	39360332	39360333	1-39826005
chr1	39370185	39372480	chr1_MACF1+:E066:downstream	chr1	39371429	39371430	1-39837102
chr1	39370185	39372480	chr1_MACF1+:E066:downstream	chr1	39371671	39371672	1-39837344
chr1	39370185	39372480	chr1_MACF1+:E066:downstream	chr1	39371954	39371955	1-39837627
chr1	39385928	39387188	chr1_MACF1+:E073:downstream	chr1	39386469	39386470	1-39852142
chr1	39388657	39422375	chr1_MACF1+:E074:downstream	chr1	39389504	39389505	1-39855177
chr1	39388657	39422375	chr1_MACF1+:E074:downstream	chr1	39391519	39391520	1-39857192
chr1	39388657	39422375	chr1_MACF1+:E074:downstream	chr1	39393121	39393122	1-39858794
chr1	39388657	39422375	chr1_MACF1+:E074:downstream	chr1	39393274	39393275	1-39858947
chr1	39388657	39422375	chr1_MACF1+:E074:downstream	chr1	39394265	39394266	1-39859938
chr1	39388657	39422375	chr1_MACF1+:E074:downstream	chr1	39397542	39397543	1-39863215
chr1	39388657	39422375	chr1_MACF1+:E074:downstream	chr1	39401382	39401383	1-39867055
chr1	39388657	39422375	chr1_MACF1+:E074:downstream	chr1	39405120	39405121	1-39870793
chr1	39388657	39422375	chr1_MACF1+:E074:downstream	chr1	39408866	39408867	1-39874539
chr1	39388657	39422375	chr1_MACF1+:E074:downstream	chr1	39414646	39414647	1-39880319
chr1	39388657	39422375	chr1_MACF1+:E074:downstream	chr1	39415367	39415368	1-39881040
chr1	39388657	39422375	chr1_MACF1+:E074:downstream	chr1	39415795	39415796	1-39881468
chr1	39388657	39422375	chr1_MACF1+:E074:downstream	chr1	39418760	39418761	1-39884433
chr1	39388657	39422375	chr1_MACF1+:E074:downstream	chr1	39420090	39420091	1-39885763
chr1	39388657	39422375	chr1_MACF1+:E074:downstream	chr1	39421100	39421101	1-39886773
chr1	39422899	39424029	chr1_MACF1+:E076:downstream	chr1	39424004	39424005	1-39889677
chr1	39424193	39427456	chr1_MACF1+:E077:downstream	chr1	39427101	39427102	1-39892774
chr1	39424193	39427456	chr1_MACF1+:E077:downstream	chr1	39427420	39427421	1-39893093
chr1	39429325	39429828	chr1_MACF1+:E080:downstream	chr1	39429787	39429788	1-39895460
chr1	39438007	39439275	chr1_MACF1+:E088:downstream	chr1	39438939	39438940	1-39904612
chr1	39439499	39441004	chr1_MACF1+:E089:downstream	chr1	39439915	39439916	1-39905588
chr1	39439499	39441004	chr1_MACF1+:E089:downstream	chr1	39440200	39440201	1-39905873
chr1	39442910	39443447	chr1_MACF1+:E095:downstream	chr1	39443053	39443054	1-39908726
chr1	39443573	39444663	chr1_MACF1+:E096:downstream	chr1	39443882	39443883	1-39909555
chr1	39444834	39447433	chr1_MACF1+:E097:downstream	chr1	39445328	39445329	1-39911001
chr1	39447586	39447693	chr1_MACF1+:E098:downstream	chr1	39447678	39447679	1-39913351
chr1	39448151	39448595	chr1_MACF1+:E100:downstream	chr1	39448417	39448418	1-39914090
chr1	39448762	39451053	chr1_MACF1+:E101:downstream	chr1	39449536	39449537	1-39915209
chr1	39455096	39458371	chr1_MACF1+:E106:downstream	chr1	39456138	39456139	1-39921811
chr1	39455096	39458371	chr1_MACF1+:E106:downstream	chr1	39456753	39456754	1-39922426
chr1	39455096	39458371	chr1_MACF1+:E106:downstream	chr1	39457211	39457212	1-39922884
chr1	39455096	39458371	chr1_MACF1+:E106:downstream	chr1	39458059	39458060	1-39923732
chr1	39458489	39459087	chr1_MACF1+:E107:downstream	chr1	39458725	39458726	1-39924398
chr1	39468731	39469548	chr1_MACF1+:E113:downstream	chr1	39469103	39469104	1-39934776
chr22	29994169	29998762	chr22_MTMR3+:E017:downstream	chr22	29994560	29994561	22-30390550
chr2	65088689	65088940	chr2_RAB1A-:E001:downstream	chr2	65088768	65088769	2-65315903
chr2	160274763	160275631	chr2_RBMS1-:E001:downstream	chr2	160275182	160275183	2-161131694
chr3	152415110	152432718	chr3_MBNL1+:E024:downstream	chr3	152421595	152421596	3-152139385
chr3	152415110	152432718	chr3_MBNL1+:E024:downstream	chr3	152423248	152423249	3-152141038
chr3	152415110	152432718	chr3_MBNL1+:E024:downstream	chr3	152425664	152425665	3-152143454
chr3	152415110	152432718	chr3_MBNL1+:E024:downstream	chr3	152426755	152426756	3-152144545
chr3	152447772	152455543	chr3_MBNL1+:E028:downstream	chr3	152448270	152448271	3-152166060
chr3	12305958	12312379	chr3_PPARG+:E006:downstream	chr3	12306237	12306238	3-12347737
chr3	12305958	12312379	chr3_PPARG+:E006:downstream	chr3	12306315	12306316	3-12347815
chr3	12305958	12312379	chr3_PPARG+:E006:downstream	chr3	12307335	12307336	3-12348835
chr3	12305958	12312379	chr3_PPARG+:E006:downstream	chr3	12307990	12307991	3-12349490
chr3	12305958	12312379	chr3_PPARG+:E006:downstream	chr3	12308424	12308425	3-12349924
chr3	12305958	12312379	chr3_PPARG+:E006:downstream	chr3	12309240	12309241	3-12350740
chr3	12305958	12312379	chr3_PPARG+:E006:downstream	chr3	12309281	12309282	3-12350781
chr3	12305958	12312379	chr3_PPARG+:E006:downstream	chr3	12309450	12309451	3-12350950
chr3	12305958	12312379	chr3_PPARG+:E006:downstream	chr3	12309695	12309696	3-12351195
chr3	12305958	12312379	chr3_PPARG+:E006:downstream	chr3	12310021	12310022	3-12351521
chr3	12305958	12312379	chr3_PPARG+:E006:downstream	chr3	12310074	12310075	3-12351574
chr3	12305958	12312379	chr3_PPARG+:E006:downstream	chr3	12310083	12310084	3-12351583
chr3	12305958	12312379	chr3_PPARG+:E006:downstream	chr3	12310246	12310247	3-12351746
chr3	12305958	12312379	chr3_PPARG+:E006:downstream	chr3	12310968	12310969	3-12352468
chr3	12305958	12312379	chr3_PPARG+:E006:downstream	chr3	12311188	12311189	3-12352688
chr3	12305958	12312379	chr3_PPARG+:E006:downstream	chr3	12311471	12311472	3-12352971
chr3	12305958	12312379	chr3_PPARG+:E006:downstream	chr3	12311698	12311699	3-12353198
chr3	12305958	12312379	chr3_PPARG+:E006:downstream	chr3	12311826	12311827	3-12353326
chr3	12305958	12312379	chr3_PPARG+:E006:downstream	chr3	12312112	12312113	3-12353612
chr3	23343231	23345867	chr3_UBE2E2+:E007:downstream	chr3	23343716	23343717	3-23385208
chr3	23343231	23345867	chr3_UBE2E2+:E007:downstream	chr3	23344385	23344386	3-23385877
chr3	23343231	23345867	chr3_UBE2E2+:E007:downstream	chr3	23344450	23344451	3-23385942
chr3	23343231	23345867	chr3_UBE2E2+:E007:downstream	chr3	23344804	23344805	3-23386296
chr3	23343231	23345867	chr3_UBE2E2+:E007:downstream	chr3	23345079	23345080	3-23386571
chr3	23343231	23345867	chr3_UBE2E2+:E007:downstream	chr3	23345388	23345389	3-23386880
chr3	23343231	23345867	chr3_UBE2E2+:E007:downstream	chr3	23345453	23345454	3-23386945
chr3	23343231	23345867	chr3_UBE2E2+:E007:downstream	chr3	23345464	23345465	3-23386956
chr3	23343231	23345867	chr3_UBE2E2+:E007:downstream	chr3	23345521	23345522	3-23387013
chr4	88805051	88822977	chr4_FAM13A-:E019:downstream	chr4	88819742	88819743	4-89740894
chr5	102974435	102987519	chr5_PAM+:E023:downstream	chr5	102974461	102974462	5-102310166
chr5	102974435	102987519	chr5_PAM+:E023:downstream	chr5	102976833	102976834	5-102312538
chr5	102974435	102987519	chr5_PAM+:E023:downstream	chr5	102977978	102977979	5-102313683
chr5	102974435	102987519	chr5_PAM+:E023:downstream	chr5	102978234	102978235	5-102313939
chr5	102974435	102987519	chr5_PAM+:E023:downstream	chr5	102978352	102978353	5-102314057
chr5	102974435	102987519	chr5_PAM+:E023:downstream	chr5	102978522	102978523	5-102314227
chr5	102974435	102987519	chr5_PAM+:E023:downstream	chr5	102980901	102980902	5-102316606
chr5	102974435	102987519	chr5_PAM+:E023:downstream	chr5	102981337	102981338	5-102317042
chr5	102974435	102987519	chr5_PAM+:E023:downstream	chr5	102981412	102981413	5-102317117
chr5	102974435	102987519	chr5_PAM+:E023:downstream	chr5	102981713	102981714	5-102317418
chr5	102974435	102987519	chr5_PAM+:E023:downstream	chr5	102983269	102983270	5-102318974
chr5	102974435	102987519	chr5_PAM+:E023:downstream	chr5	102983332	102983333	5-102319037
chr5	102974435	102987519	chr5_PAM+:E023:downstream	chr5	102986200	102986201	5-102321905
chr5	102974435	102987519	chr5_PAM+:E023:downstream	chr5	102986743	102986744	5-102322448
chr5	102987570	102990273	chr5_PAM+:E024:downstream	chr5	102988061	102988062	5-102323766
chr5	102987570	102990273	chr5_PAM+:E024:downstream	chr5	102989913	102989914	5-102325618
chr5	102987570	102990273	chr5_PAM+:E024:downstream	chr5	102989987	102989988	5-102325692
chr5	102987570	102990273	chr5_PAM+:E024:downstream	chr5	102990173	102990174	5-102325878
chr6	126433624	126480579	chr6_CENPW+:E008:downstream	chr6	126433908	126433909	6-126755055
chr6	126433624	126480579	chr6_CENPW+:E008:downstream	chr6	126434495	126434496	6-126755642
chr6	126433624	126480579	chr6_CENPW+:E008:downstream	chr6	126437393	126437394	6-126758540
chr6	126433624	126480579	chr6_CENPW+:E008:downstream	chr6	126437644	126437645	6-126758791
chr6	126433624	126480579	chr6_CENPW+:E008:downstream	chr6	126437886	126437887	6-126759033
chr6	126433624	126480579	chr6_CENPW+:E008:downstream	chr6	126438440	126438441	6-126759587
chr6	126433624	126480579	chr6_CENPW+:E008:downstream	chr6	126439847	126439848	6-126760994
chr6	126433624	126480579	chr6_CENPW+:E008:downstream	chr6	126440081	126440082	6-126761228
chr6	126433624	126480579	chr6_CENPW+:E008:downstream	chr6	126443043	126443044	6-126764190
chr6	126433624	126480579	chr6_CENPW+:E008:downstream	chr6	126446364	126446365	6-126767511
chr6	126433624	126480579	chr6_CENPW+:E008:downstream	chr6	126446453	126446454	6-126767600
chr6	126433624	126480579	chr6_CENPW+:E008:downstream	chr6	126449877	126449878	6-126771024
chr6	126433624	126480579	chr6_CENPW+:E008:downstream	chr6	126449996	126449997	6-126771143
chr6	126433624	126480579	chr6_CENPW+:E008:downstream	chr6	126450540	126450541	6-126771687
chr6	126433624	126480579	chr6_CENPW+:E008:downstream	chr6	126452340	126452341	6-126773487
chr6	126433624	126480579	chr6_CENPW+:E008:downstream	chr6	126452433	126452434	6-126773580
chr6	126433624	126480579	chr6_CENPW+:E008:downstream	chr6	126454947	126454948	6-126776094
chr6	126433624	126480579	chr6_CENPW+:E008:downstream	chr6	126457453	126457454	6-126778600
chr6	126433624	126480579	chr6_CENPW+:E008:downstream	chr6	126460287	126460288	6-126781434
chr6	126433624	126480579	chr6_CENPW+:E008:downstream	chr6	126461310	126461311	6-126782457
chr6	126433624	126480579	chr6_CENPW+:E008:downstream	chr6	126463915	126463916	6-126785062
chr6	126433624	126480579	chr6_CENPW+:E008:downstream	chr6	126466960	126466961	6-126788107
chr6	126433624	126480579	chr6_CENPW+:E008:downstream	chr6	126467997	126467998	6-126789144
chr6	126433624	126480579	chr6_CENPW+:E008:downstream	chr6	126468325	126468326	6-126789472
chr6	126433624	126480579	chr6_CENPW+:E008:downstream	chr6	126470948	126470949	6-126792095
chr6	126433624	126480579	chr6_CENPW+:E008:downstream	chr6	126475964	126475965	6-126797111
chr6	126433624	126480579	chr6_CENPW+:E008:downstream	chr6	126479997	126479998	6-126801144
chr8	41578579	41598293	chr8_GPAT4+:E004:downstream	chr8	41579015	41579016	8-41436535
chr8	41578579	41598293	chr8_GPAT4+:E004:downstream	chr8	41579719	41579720	8-41437239
chr8	41578579	41598293	chr8_GPAT4+:E004:downstream	chr8	41580208	41580209	8-41437728
chr8	41578579	41598293	chr8_GPAT4+:E004:downstream	chr8	41581583	41581584	8-41439103
chr8	41578579	41598293	chr8_GPAT4+:E004:downstream	chr8	41586006	41586007	8-41443526
chr8	41578579	41598293	chr8_GPAT4+:E004:downstream	chr8	41590157	41590158	8-41447677
chr8	41578579	41598293	chr8_GPAT4+:E004:downstream	chr8	41591278	41591279	8-41448798
chr8	41578579	41598293	chr8_GPAT4+:E004:downstream	chr8	41591595	41591596	8-41449115
chr8	41578579	41598293	chr8_GPAT4+:E004:downstream	chr8	41594826	41594827	8-41452346
chr8	41578579	41598293	chr8_GPAT4+:E004:downstream	chr8	41595572	41595573	8-41453092
chr8	94823560	94824894	chr8_INTS8+:E003:downstream	chr8	94824583	94824584	8-95836812
chr9	4153301	4286039	chr9_GLIS3-:E019:downstream	chr9	4282941	4282942	9-4282942
chr9	4153301	4286039	chr9_GLIS3-:E019:downstream	chr9	4283136	4283137	9-4283137
chr9	4153301	4286039	chr9_GLIS3-:E019:downstream	chr9	4285118	4285119	9-4285119
chr9	19089558	19093172	chr9_HAUS6-:E017:downstream	chr9	19090415	19090416	9-19090414

## Sheet: BMI obese day 3 vs day 15
exon_chr	exon_start	exon_end	exon_name	snp_chr	snp_start	snp_end	snp_name
chr10	26939294	26942003	chr10_ANKRD26-:E002:upstream	chr10	26940641	26940642	rs9787435
chr10	26939294	26942003	chr10_ANKRD26-:E002:upstream	chr10	26940610	26940611	rs9787668
chr10	21617206	21622331	chr10_MLLT10+:E026:upstream	chr10	21618086	21618087	rs1243187
chr10	21617206	21622331	chr10_MLLT10+:E026:upstream	chr10	21619873	21619874	rs1243188
chr10	102744142	102776132	chr10_WBP1L+:E003:upstream	chr10	102744806	102744807	rs999867
chr10	27149039	27154179	chr10_YME1L1-:E021:upstream	chr10	27154082	27154083	rs2274636
chr10	27149039	27154179	chr10_YME1L1-:E021:upstream	chr10	27154153	27154154	rs2274637
chr11	43854863	43855145	chr11_HSD17B12+:E019:upstream	chr11	43854884	43854885	rs3736505
chr13	30463693	30464162	chr13_HMGB1-:E009:upstream	chr13	30463765	30463766	rs2249825
chr14	102283591	102304963	chr14_MOK-:E034:upstream	chr14	102292581	102292582	rs8015818
chr16	30059656	30064280	chr16_ALDOA+:E002:upstream	chr16	30061208	30061209	rs9928448
chr17	67826336	67853941	chr17_BPTF+:E004:upstream	chr17	67829131	67829132	rs12603589
chr17	67826336	67853941	chr17_BPTF+:E004:upstream	chr17	67836885	67836886	rs1976053
chr17	67826336	67853941	chr17_BPTF+:E004:upstream	chr17	67832254	67832255	rs2080090
chr17	67826336	67853941	chr17_BPTF+:E004:upstream	chr17	67845201	67845202	rs2365468
chr17	67826336	67853941	chr17_BPTF+:E004:upstream	chr17	67836273	67836274	rs7221651
chr17	67826336	67853941	chr17_BPTF+:E004:upstream	chr17	67842626	67842627	rs8074078
chr17	67826336	67853941	chr17_BPTF+:E004:upstream	chr17	67853810	67853811	rs2046323
chr17	67826336	67853941	chr17_BPTF+:E004:upstream	chr17	67851208	67851209	rs7212293
chr17	67826336	67853941	chr17_BPTF+:E004:upstream	chr17	67849580	67849581	rs8081517
chr17	29706850	29710988	chr17_SSH2-:E023:upstream	chr17	29710904	29710905	rs2874505
chr17	29706850	29710988	chr17_SSH2-:E023:upstream	chr17	29707995	29707996	rs3115090
chr17	29706850	29710988	chr17_SSH2-:E023:upstream	chr17	29709331	29709332	rs3115092
chr1	31658963	31660586	chr1_COL16A1-:E013:upstream	chr1	31660341	31660342	rs10914462
chr1	114741672	114749822	chr1_CSDE1-:E021:upstream	chr1	114749356	114749357	rs4140445
chr1	151103674	151107038	chr1_GABPB2+:E015:upstream	chr1	151106840	151106841	rs6676190
chr1	33349897	33354402	chr1_PHC2-:E008:upstream	chr1	33352812	33352813	rs4652856
chr1	33349897	33354402	chr1_PHC2-:E008:upstream	chr1	33354228	33354229	rs4653081
chr1	92837632	92840552	chr1_RPL5+:E010:upstream	chr1	92837893	92837894	rs6659942
chr20	62896995	62904999	chr20_DIDO1-:E014:upstream	chr20	62899562	62899563	rs6011457
chr20	25295669	25296371	chr20_PYGB+:E023:upstream	chr20	25296043	25296044	rs2258769
chr2	164800553	164841157	chr2_COBLL1-:E019:upstream	chr2	164811132	164811133	rs409125
chr2	164800553	164841157	chr2_COBLL1-:E019:upstream	chr2	164829135	164829136	rs355810
chr2	171553499	171554525	chr2_CYBRD1+:E006:upstream	chr2	171553675	171553676	rs17288588
chr2	24673462	24682952	chr2_NCOA1+:E013:upstream	chr2	24679202	24679203	rs11693687
chr2	28752175	28776852	chr2_PPP1CB+:E004:upstream	chr2	28759163	28759164	rs6547874
chr2	28752175	28776852	chr2_PPP1CB+:E004:upstream	chr2	28765216	28765217	rs6707848
chr2	28752175	28776852	chr2_PPP1CB+:E004:upstream	chr2	28772359	28772360	rs10183665
chr2	28752175	28776852	chr2_PPP1CB+:E004:upstream	chr2	28773428	28773429	rs7579277
chr2	28752175	28776852	chr2_PPP1CB+:E004:upstream	chr2	28774134	28774135	rs7580078
chr2	160367390	160407465	chr2_RBMS1-:E017:upstream	chr2	160375504	160375505	rs6733297
chr2	160367390	160407465	chr2_RBMS1-:E017:upstream	chr2	160385783	160385784	rs12998587
chr2	160367390	160407465	chr2_RBMS1-:E017:upstream	chr2	160396055	160396056	rs13005826
chr2	160367390	160407465	chr2_RBMS1-:E017:upstream	chr2	160387561	160387562	rs6711540
chr2	160367390	160407465	chr2_RBMS1-:E017:upstream	chr2	160402770	160402771	rs7587102
chr2	54987697	55010088	chr2_RTN4-:E007:upstream	chr2	54991654	54991655	rs10496036
chr2	54987697	55010088	chr2_RTN4-:E007:upstream	chr2	54993447	54993448	rs17046570
chr2	55010333	55025087	chr2_RTN4-:E008:upstream	chr2	55011619	55011620	rs10189094
chr2	55010333	55025087	chr2_RTN4-:E008:upstream	chr2	55017401	55017402	rs17046594
chr2	55010333	55025087	chr2_RTN4-:E008:upstream	chr2	55011540	55011541	rs3806572
chr2	55010333	55025087	chr2_RTN4-:E008:upstream	chr2	55020120	55020121	rs12475787
chr2	55010333	55025087	chr2_RTN4-:E008:upstream	chr2	55024237	55024238	rs7601625
chr3	154316162	154324175	chr3_DHX36-:E028:upstream	chr3	154320622	154320623	rs171390
chr3	154316162	154324175	chr3_DHX36-:E028:upstream	chr3	154318916	154318917	rs355772
chr3	154316162	154324175	chr3_DHX36-:E028:upstream	chr3	154318339	154318340	rs355775
chr3	154316162	154324175	chr3_DHX36-:E028:upstream	chr3	154317160	154317161	rs355777
chr3	154316162	154324175	chr3_DHX36-:E028:upstream	chr3	154321595	154321596	rs355771
chr3	119947350	119996631	chr3_GSK3B-:E012:upstream	chr3	119950288	119950289	rs10934502
chr3	119947350	119996631	chr3_GSK3B-:E012:upstream	chr3	119959977	119959978	rs12634476
chr3	119947350	119996631	chr3_GSK3B-:E012:upstream	chr3	119972319	119972320	rs10934503
chr3	119947350	119996631	chr3_GSK3B-:E012:upstream	chr3	119965979	119965980	rs12638973
chr3	47914938	47915952	chr3_MAP4-:E020:upstream	chr3	47915015	47915016	rs11707679
chr3	12417153	12433899	chr3_PPARG+:E018:upstream	chr3	12426963	12426964	rs13099634
chr3	12417153	12433899	chr3_PPARG+:E018:upstream	chr3	12427089	12427090	rs13099828
chr3	12417153	12433899	chr3_PPARG+:E018:upstream	chr3	12429862	12429863	rs6794024
chr3	12417153	12433899	chr3_PPARG+:E018:upstream	chr3	12433588	12433589	rs7626560
chr3	12417153	12433899	chr3_PPARG+:E018:upstream	chr3	12422326	12422327	rs7645903
chr3	12417153	12433899	chr3_PPARG+:E018:upstream	chr3	12433662	12433663	rs7650895
chr3	136518414	136521214	chr3_STAG1-:E033:upstream	chr3	136520017	136520018	rs9812319
chr3	136518414	136521214	chr3_STAG1-:E033:upstream	chr3	136518730	136518731	rs9878078
chr3	88059504	88086258	chr3_ZNF654+:E005:upstream	chr3	88063814	88063815	rs13098157
chr3	88059504	88086258	chr3_ZNF654+:E005:upstream	chr3	88060462	88060463	rs2049817
chr3	88059504	88086258	chr3_ZNF654+:E005:upstream	chr3	88062529	88062530	rs4858981
chr3	88059504	88086258	chr3_ZNF654+:E005:upstream	chr3	88062642	88062643	rs4858983
chr3	88059504	88086258	chr3_ZNF654+:E005:upstream	chr3	88061102	88061103	rs9310066
chr3	88059504	88086258	chr3_ZNF654+:E005:upstream	chr3	88062044	88062045	rs959049
chr3	88059504	88086258	chr3_ZNF654+:E005:upstream	chr3	88061878	88061879	rs959050
chr3	88059504	88086258	chr3_ZNF654+:E005:upstream	chr3	88072584	88072585	rs4368523
chr3	88059504	88086258	chr3_ZNF654+:E005:upstream	chr3	88065222	88065223	rs4611846
chr3	88059504	88086258	chr3_ZNF654+:E005:upstream	chr3	88068307	88068308	rs4858985
chr3	88059504	88086258	chr3_ZNF654+:E005:upstream	chr3	88076538	88076539	rs4858994
chr3	88059504	88086258	chr3_ZNF654+:E005:upstream	chr3	88074947	88074948	rs9310067
chr3	88059504	88086258	chr3_ZNF654+:E005:upstream	chr3	88079692	88079693	rs9834501
chr3	88059504	88086258	chr3_ZNF654+:E005:upstream	chr3	88082082	88082083	rs4438681
chr3	88059504	88086258	chr3_ZNF654+:E005:upstream	chr3	88082804	88082805	rs7618472
chr3	88059504	88086258	chr3_ZNF654+:E005:upstream	chr3	88085179	88085180	rs9845776
chr5	75389686	75399311	chr5_COL4A3BP-:E010:upstream	chr5	75389694	75389695	rs3761743
chr5	75389686	75399311	chr5_COL4A3BP-:E010:upstream	chr5	75396950	75396951	rs6453133
chr5	75389686	75399311	chr5_COL4A3BP-:E010:upstream	chr5	75393423	75393424	rs6878990
chr5	158942881	159052780	chr5_EBF1-:E023:upstream	chr5	158977120	158977121	rs2161356
chr5	158942881	159052780	chr5_EBF1-:E023:upstream	chr5	159003866	159003867	rs869593
chr5	108367952	108380700	chr5_FBXL17-:E021:upstream	chr5	108377078	108377079	rs2052464
chr5	108367952	108380700	chr5_FBXL17-:E021:upstream	chr5	108368501	108368502	rs4957755
chr5	108367952	108380700	chr5_FBXL17-:E021:upstream	chr5	108378818	108378819	rs4957756
chr5	81636617	81650268	chr5_SSBP2-:E021:upstream	chr5	81642656	81642657	rs12521077
chr6	108664888	108679828	chr6_FOXO3+:E013:upstream	chr6	108666980	108666981	rs2153960
chr6	108664888	108679828	chr6_FOXO3+:E013:upstream	chr6	108665402	108665403	rs3778586
chr6	108664888	108679828	chr6_FOXO3+:E013:upstream	chr6	108667391	108667392	rs3800226
chr6	108664888	108679828	chr6_FOXO3+:E013:upstream	chr6	108672957	108672958	rs3800227
chr6	108664888	108679828	chr6_FOXO3+:E013:upstream	chr6	108673622	108673623	rs9398172
chr6	108664888	108679828	chr6_FOXO3+:E013:upstream	chr6	108678083	108678084	rs1935949
chr6	108664888	108679828	chr6_FOXO3+:E013:upstream	chr6	108677701	108677702	rs1935952
chr6	108664888	108679828	chr6_FOXO3+:E013:upstream	chr6	108675759	108675760	rs3800229
chr6	108664888	108679828	chr6_FOXO3+:E013:upstream	chr6	108676924	108676925	rs3800230
chr6	108664888	108679828	chr6_FOXO3+:E013:upstream	chr6	108679538	108679539	rs4946935
chr6	125781370	125786138	chr6_NCOA7+:E005:upstream	chr6	125785426	125785427	rs1028481
chr6	125781370	125786138	chr6_NCOA7+:E005:upstream	chr6	125781834	125781835	rs4897157
chr6	125781370	125786138	chr6_NCOA7+:E005:upstream	chr6	125782971	125782972	rs9401845
chr7	6374769	6387213	chr7_RAC1+:E003:upstream	chr7	6380362	6380363	rs10499343
chr7	6374769	6387213	chr7_RAC1+:E003:upstream	chr7	6381323	6381324	rs10499344
chr7	6374769	6387213	chr7_RAC1+:E003:upstream	chr7	6384240	6384241	rs768409
chr7	6374769	6387213	chr7_RAC1+:E003:upstream	chr7	6378643	6378644	rs7784465
chr8	8866839	8890062	chr8_MFHAS1-:E005:upstream	chr8	8871682	8871683	rs13274028
chr8	8866839	8890062	chr8_MFHAS1-:E005:upstream	chr8	8869293	8869294	rs1567398
chr8	8866839	8890062	chr8_MFHAS1-:E005:upstream	chr8	8872977	8872978	rs332040
chr8	8866839	8890062	chr8_MFHAS1-:E005:upstream	chr8	8872250	8872251	rs907183
chr9	100060171	100098785	chr9_ERP44-:E012:upstream	chr9	100063784	100063785	rs10739795
chr9	100060171	100098785	chr9_ERP44-:E012:upstream	chr9	100067061	100067062	rs7024016
chr9	100060171	100098785	chr9_ERP44-:E012:upstream	chr9	100082559	100082560	rs1342147
chr9	100060171	100098785	chr9_ERP44-:E012:upstream	chr9	100083625	100083626	rs1529191
chr9	100060171	100098785	chr9_ERP44-:E012:upstream	chr9	100083780	100083781	rs1529192
chr9	100060171	100098785	chr9_ERP44-:E012:upstream	chr9	100087709	100087710	rs1534726
chr9	100060171	100098785	chr9_ERP44-:E012:upstream	chr9	100088440	100088441	rs4517187
chr9	100060171	100098785	chr9_ERP44-:E012:upstream	chr9	100094023	100094024	rs1361668
chr9	37126941	37254852	chr9_ZCCHC7+:E015:upstream	chr9	37142211	37142212	rs10283534
chr9	37126941	37254852	chr9_ZCCHC7+:E015:upstream	chr9	37129498	37129499	rs13285624
chr9	37126941	37254852	chr9_ZCCHC7+:E015:upstream	chr9	37127680	37127681	rs13293465
chr9	37126941	37254852	chr9_ZCCHC7+:E015:upstream	chr9	37136361	37136362	rs13293916
chr9	37126941	37254852	chr9_ZCCHC7+:E015:upstream	chr9	37142191	37142192	rs13297576
chr9	37126941	37254852	chr9_ZCCHC7+:E015:upstream	chr9	37137984	37137985	rs13300560
chr9	37126941	37254852	chr9_ZCCHC7+:E015:upstream	chr9	37141510	37141511	rs1492713
chr9	37126941	37254852	chr9_ZCCHC7+:E015:upstream	chr9	37141261	37141262	rs1492714
chr9	37126941	37254852	chr9_ZCCHC7+:E015:upstream	chr9	37131980	37131981	rs2172364
chr9	37126941	37254852	chr9_ZCCHC7+:E015:upstream	chr9	37138674	37138675	rs7851239
chr9	37126941	37254852	chr9_ZCCHC7+:E015:upstream	chr9	37127547	37127548	rs7856690
chr9	37126941	37254852	chr9_ZCCHC7+:E015:upstream	chr9	37148107	37148108	rs12337316
chr9	37126941	37254852	chr9_ZCCHC7+:E015:upstream	chr9	37157966	37157967	rs13295115
chr9	37126941	37254852	chr9_ZCCHC7+:E015:upstream	chr9	37144064	37144065	rs1388978
chr9	37126941	37254852	chr9_ZCCHC7+:E015:upstream	chr9	37167216	37167217	rs10116283
chr9	37126941	37254852	chr9_ZCCHC7+:E015:upstream	chr9	37169659	37169660	rs2172363
chr9	37126941	37254852	chr9_ZCCHC7+:E015:upstream	chr9	37162284	37162285	rs6476616
chr9	37126941	37254852	chr9_ZCCHC7+:E015:upstream	chr9	37172422	37172423	rs7047931
chr9	37126941	37254852	chr9_ZCCHC7+:E015:upstream	chr9	37167541	37167542	rs7846747
chr9	37126941	37254852	chr9_ZCCHC7+:E015:upstream	chr9	37167841	37167842	rs7847215
chr9	37126941	37254852	chr9_ZCCHC7+:E015:upstream	chr9	37182052	37182053	rs13285022
chr9	37126941	37254852	chr9_ZCCHC7+:E015:upstream	chr9	37183630	37183631	rs13290794
chr9	37126941	37254852	chr9_ZCCHC7+:E015:upstream	chr9	37182894	37182895	rs7038219
chr9	37126941	37254852	chr9_ZCCHC7+:E015:upstream	chr9	37179381	37179382	rs7047479
chr9	37126941	37254852	chr9_ZCCHC7+:E015:upstream	chr9	37193873	37193874	rs10814515
chr9	37126941	37254852	chr9_ZCCHC7+:E015:upstream	chr9	37207682	37207683	rs2131315
chr9	37126941	37254852	chr9_ZCCHC7+:E015:upstream	chr9	37200105	37200106	rs6476617
chr9	37126941	37254852	chr9_ZCCHC7+:E015:upstream	chr9	37209398	37209399	rs1472169
chr9	37126941	37254852	chr9_ZCCHC7+:E015:upstream	chr9	37210687	37210688	rs6476619
chr9	37126941	37254852	chr9_ZCCHC7+:E015:upstream	chr9	37208390	37208391	rs7042957
chr9	37126941	37254852	chr9_ZCCHC7+:E015:upstream	chr9	37239759	37239760	rs623871
chr9	37126941	37254852	chr9_ZCCHC7+:E015:upstream	chr9	37230977	37230978	rs717546
chr9	37126941	37254852	chr9_ZCCHC7+:E015:upstream	chr9	37254692	37254693	rs10758428
chr9	37126941	37254852	chr9_ZCCHC7+:E015:upstream	chr9	37254141	37254142	rs10973268
chr9	37126941	37254852	chr9_ZCCHC7+:E015:upstream	chr9	37244507	37244508	rs12554976
chr9	37126941	37254852	chr9_ZCCHC7+:E015:upstream	chr9	37245478	37245479	rs563132
chr9	37126941	37254852	chr9_ZCCHC7+:E015:upstream	chr9	37250730	37250731	rs7044356
chr9	37126941	37254852	chr9_ZCCHC7+:E015:upstream	chr9	37248795	37248796	rs7869485
chr10	21624748	21635041	chr10_MLLT10+:E026:downstream	chr10	21626689	21626690	rs1243180
chr10	21624748	21635041	chr10_MLLT10+:E026:downstream	chr10	21627538	21627539	rs1243181
chr10	21624748	21635041	chr10_MLLT10+:E026:downstream	chr10	21627798	21627799	rs1243182
chr10	63521576	63566339	chr10_REEP3+:E002:downstream	chr10	63535349	63535350	rs10995554
chr10	63521576	63566339	chr10_REEP3+:E002:downstream	chr10	63526906	63526907	rs7085018
chr10	63521576	63566339	chr10_REEP3+:E002:downstream	chr10	63534099	63534100	rs7920036
chr10	63521576	63566339	chr10_REEP3+:E002:downstream	chr10	63548989	63548990	rs10761784
chr10	63521576	63566339	chr10_REEP3+:E002:downstream	chr10	63542938	63542939	rs12257409
chr10	63521576	63566339	chr10_REEP3+:E002:downstream	chr10	63550393	63550394	rs1991571
chr10	63521576	63566339	chr10_REEP3+:E002:downstream	chr10	63541964	63541965	rs7897379
chr10	63521576	63566339	chr10_REEP3+:E002:downstream	chr10	63555672	63555673	rs10740134
chr10	63521576	63566339	chr10_REEP3+:E002:downstream	chr10	63565365	63565366	rs10822181
chr10	63521576	63566339	chr10_REEP3+:E002:downstream	chr10	63557284	63557285	rs12247907
chr10	63521576	63566339	chr10_REEP3+:E002:downstream	chr10	63554950	63554951	rs2163188
chr10	63521576	63566339	chr10_REEP3+:E002:downstream	chr10	63555244	63555245	rs2393985
chr10	63521576	63566339	chr10_REEP3+:E002:downstream	chr10	63560245	63560246	rs2393986
chr10	63521576	63566339	chr10_REEP3+:E002:downstream	chr10	63555470	63555471	rs6479905
chr10	63521576	63566339	chr10_REEP3+:E002:downstream	chr10	63555725	63555726	rs6479906
chr10	63521576	63566339	chr10_REEP3+:E002:downstream	chr10	63557295	63557296	rs7070761
chr10	63521576	63566339	chr10_REEP3+:E002:downstream	chr10	63563504	63563505	rs7899657
chr10	63521576	63566339	chr10_REEP3+:E002:downstream	chr10	63556039	63556040	rs7919685
chr10	102776416	102796677	chr10_WBP1L+:E003:downstream	chr10	102776602	102776603	rs4147157
chr10	102776416	102796677	chr10_WBP1L+:E003:downstream	chr10	102790321	102790322	rs284841
chr10	102776416	102796677	chr10_WBP1L+:E003:downstream	chr10	102796296	102796297	rs176185
chr10	102776416	102796677	chr10_WBP1L+:E003:downstream	chr10	102794771	102794772	rs284844
chr11	47311841	47315221	chr11_MADD+:E040:downstream	chr11	47314768	47314769	rs7944584
chr11	47779193	47780344	chr11_NUP160-:E001:downstream	chr11	47779548	47779549	rs7114813
chr11	822605	823528	chr11_PNPLA2+:E008:downstream	chr11	822621	822622	rs7942159
chr11	32103479	32104366	chr11_RCN1+:E005:downstream	chr11	32104308	32104309	rs223058
chr12	110724763	110730530	chr12_PPP1CC-:E009:downstream	chr12	110727309	110727310	rs16940970
chr12	110724763	110730530	chr12_PPP1CC-:E009:downstream	chr12	110726431	110726432	rs7960552
chr12	112419124	112446277	chr12_PTPN11+:E003:downstream	chr12	112433567	112433568	rs11066301
chr12	754323	813643	chr12_WNK1+:E004:downstream	chr12	780735	780736	rs11064524
chr12	754323	813643	chr12_WNK1+:E004:downstream	chr12	793912	793913	rs2107614
chr12	754323	813643	chr12_WNK1+:E004:downstream	chr12	799116	799117	rs765250
chr16	81699800	81701661	chr16_CMIP+:E022:downstream	chr16	81701406	81701407	rs3751859
chr17	67854761	67866465	chr17_BPTF+:E004:downstream	chr17	67861060	67861061	rs2128792
chr17	67854761	67866465	chr17_BPTF+:E004:downstream	chr17	67856790	67856791	rs4790908
chr17	48033301	48033864	chr17_COPZ2-:E007:downstream	chr17	48033805	48033806	rs2240119
chr17	36545816	36554821	chr17_GGNBP2+:E005:downstream	chr17	36549143	36549144	rs12601380
chr17	36545816	36554821	chr17_GGNBP2+:E005:downstream	chr17	36552377	36552378	rs8078390
chr17	36545816	36554821	chr17_GGNBP2+:E005:downstream	chr17	36549566	36549567	rs9906189
chr17	29712543	29732934	chr17_SSH2-:E023:downstream	chr17	29717082	29717083	rs3102555
chr17	29712543	29732934	chr17_SSH2-:E023:downstream	chr17	29712736	29712737	rs3115093
chr17	29712543	29732934	chr17_SSH2-:E023:downstream	chr17	29714608	29714609	rs3115101
chr17	29712543	29732934	chr17_SSH2-:E023:downstream	chr17	29722785	29722786	rs2617865
chr17	29712543	29732934	chr17_SSH2-:E023:downstream	chr17	29722380	29722381	rs2617867
chr17	29712543	29732934	chr17_SSH2-:E023:downstream	chr17	29724121	29724122	rs2628191
chr17	63726694	63728335	chr17_STRADA-:E020:downstream	chr17	63727325	63727326	rs8075422
chr18	23506641	23522221	chr18_NPC1-:E002:downstream	chr18	23507566	23507567	rs891389
chr18	23506641	23522221	chr18_NPC1-:E002:downstream	chr18	23519618	23519619	rs1652342
chr18	23506641	23522221	chr18_NPC1-:E002:downstream	chr18	23521979	23521980	rs1788820
chr18	23506641	23522221	chr18_NPC1-:E002:downstream	chr18	23521491	23521492	rs6507708
chr1	31658963	31660586	chr1_COL16A1-:E012:downstream	chr1	31660341	31660342	rs10914462
chr1	151107221	151117393	chr1_GABPB2+:E015:downstream	chr1	151117125	151117126	rs6656450
chr1	23094379	23109023	chr1_LUZP1-:E003:downstream	chr1	23105283	23105284	rs765803
chr1	39084437	39105380	chr1_MACF1+:E006:downstream	chr1	39103898	39103899	rs2282231
chr1	39430907	39432536	chr1_MACF1+:E082:downstream	chr1	39431598	39431599	rs599823
chr1	45608336	45613170	chr1_NASP+:E010:downstream	chr1	45612957	45612958	rs2050376
chr1	109355468	109367409	chr1_SORT1-:E020:downstream	chr1	109366526	109366527	rs3879450
chr1	197188438	197190763	chr1_ZBTB41-:E011:downstream	chr1	197188763	197188764	rs1415212
chr20	32372548	32428129	chr20_ASXL1+:E017:downstream	chr20	32373396	32373397	rs4911222
chr20	2873759	2923208	chr20_PTPRA+:E001:downstream	chr20	2883333	2883334	rs1161237
chr2	171541792	171553347	chr2_CYBRD1+:E004:downstream	chr2	171552754	171552755	rs17222641
chr2	69374112	69382925	chr2_GFPT1-:E021:downstream	chr2	69379203	69379204	rs13422656
chr2	24683127	24691482	chr2_NCOA1+:E013:downstream	chr2	24683325	24683326	rs11674421
chr2	24683127	24691482	chr2_NCOA1+:E013:downstream	chr2	24684228	24684229	rs17735622
chr2	28752175	28776852	chr2_PPP1CB+:E003:downstream	chr2	28759163	28759164	rs6547874
chr2	28752175	28776852	chr2_PPP1CB+:E003:downstream	chr2	28765216	28765217	rs6707848
chr2	28752175	28776852	chr2_PPP1CB+:E003:downstream	chr2	28772359	28772360	rs10183665
chr2	28752175	28776852	chr2_PPP1CB+:E003:downstream	chr2	28773428	28773429	rs7579277
chr2	28752175	28776852	chr2_PPP1CB+:E003:downstream	chr2	28774134	28774135	rs7580078
chr2	55010333	55025087	chr2_RTN4-:E007:downstream	chr2	55011619	55011620	rs10189094
chr2	55010333	55025087	chr2_RTN4-:E007:downstream	chr2	55017401	55017402	rs17046594
chr2	55010333	55025087	chr2_RTN4-:E007:downstream	chr2	55011540	55011541	rs3806572
chr2	55010333	55025087	chr2_RTN4-:E007:downstream	chr2	55020120	55020121	rs12475787
chr2	55010333	55025087	chr2_RTN4-:E007:downstream	chr2	55024237	55024238	rs7601625
chr2	48569085	48776281	chr2_STON1-GTF2A1L+:E002:downstream	chr2	48728543	48728544	rs4596023
chr2	48569085	48776281	chr2_STON1-GTF2A1L+:E002:downstream	chr2	48727765	48727766	rs7561278
chr3	120002238	120093348	chr3_GSK3B-:E013:downstream	chr3	120014862	120014863	rs4688054
chr3	120002238	120093348	chr3_GSK3B-:E013:downstream	chr3	120038165	120038166	rs1870931
chr3	120002238	120093348	chr3_GSK3B-:E013:downstream	chr3	120048474	120048475	rs10934505
chr3	120002238	120093348	chr3_GSK3B-:E013:downstream	chr3	120051804	120051805	rs10934506
chr3	120002238	120093348	chr3_GSK3B-:E013:downstream	chr3	120051812	120051813	rs10934507
chr3	120002238	120093348	chr3_GSK3B-:E013:downstream	chr3	120092720	120092721	rs4688059
chr3	12312452	12349470	chr3_PPARG+:E008:downstream	chr3	12327901	12327902	rs13064760
chr3	12312452	12349470	chr3_PPARG+:E008:downstream	chr3	12323808	12323809	rs13083375
chr3	12312452	12349470	chr3_PPARG+:E008:downstream	chr3	12344328	12344329	rs11128603
chr3	12312452	12349470	chr3_PPARG+:E008:downstream	chr3	12347813	12347814	rs17036326
chr3	12312452	12349470	chr3_PPARG+:E008:downstream	chr3	12348984	12348985	rs17036328
chr3	12312452	12349470	chr3_PPARG+:E008:downstream	chr3	12344837	12344838	rs4684847
chr3	12312452	12349470	chr3_PPARG+:E008:downstream	chr3	12342214	12342215	rs7638903
chr3	12351673	12379705	chr3_PPARG+:E011:downstream	chr3	12353340	12353341	rs1899951
chr3	12351673	12379705	chr3_PPARG+:E011:downstream	chr3	12355455	12355456	rs2881654
chr3	12351673	12379705	chr3_PPARG+:E011:downstream	chr3	12372920	12372921	rs6809832
chr3	12417153	12433899	chr3_PPARG+:E017:downstream	chr3	12426963	12426964	rs13099634
chr3	12417153	12433899	chr3_PPARG+:E017:downstream	chr3	12427089	12427090	rs13099828
chr3	12417153	12433899	chr3_PPARG+:E017:downstream	chr3	12429862	12429863	rs6794024
chr3	12417153	12433899	chr3_PPARG+:E017:downstream	chr3	12433588	12433589	rs7626560
chr3	12417153	12433899	chr3_PPARG+:E017:downstream	chr3	12422326	12422327	rs7645903
chr3	12417153	12433899	chr3_PPARG+:E017:downstream	chr3	12433662	12433663	rs7650895
chr3	136521416	136542120	chr3_STAG1-:E033:downstream	chr3	136521523	136521524	rs13092193
chr3	136521416	136542120	chr3_STAG1-:E033:downstream	chr3	136522185	136522186	rs6771002
chr3	136521416	136542120	chr3_STAG1-:E033:downstream	chr3	136529244	136529245	rs1070232
chr3	136521416	136542120	chr3_STAG1-:E033:downstream	chr3	136540081	136540082	rs3932048
chr3	136521416	136542120	chr3_STAG1-:E033:downstream	chr3	136541879	136541880	rs9813691
chr3	88059504	88086258	chr3_ZNF654+:E004:downstream	chr3	88063814	88063815	rs13098157
chr3	88059504	88086258	chr3_ZNF654+:E004:downstream	chr3	88060462	88060463	rs2049817
chr3	88059504	88086258	chr3_ZNF654+:E004:downstream	chr3	88062529	88062530	rs4858981
chr3	88059504	88086258	chr3_ZNF654+:E004:downstream	chr3	88062642	88062643	rs4858983
chr3	88059504	88086258	chr3_ZNF654+:E004:downstream	chr3	88061102	88061103	rs9310066
chr3	88059504	88086258	chr3_ZNF654+:E004:downstream	chr3	88062044	88062045	rs959049
chr3	88059504	88086258	chr3_ZNF654+:E004:downstream	chr3	88061878	88061879	rs959050
chr3	88059504	88086258	chr3_ZNF654+:E004:downstream	chr3	88072584	88072585	rs4368523
chr3	88059504	88086258	chr3_ZNF654+:E004:downstream	chr3	88065222	88065223	rs4611846
chr3	88059504	88086258	chr3_ZNF654+:E004:downstream	chr3	88068307	88068308	rs4858985
chr3	88059504	88086258	chr3_ZNF654+:E004:downstream	chr3	88076538	88076539	rs4858994
chr3	88059504	88086258	chr3_ZNF654+:E004:downstream	chr3	88074947	88074948	rs9310067
chr3	88059504	88086258	chr3_ZNF654+:E004:downstream	chr3	88079692	88079693	rs9834501
chr3	88059504	88086258	chr3_ZNF654+:E004:downstream	chr3	88082082	88082083	rs4438681
chr3	88059504	88086258	chr3_ZNF654+:E004:downstream	chr3	88082804	88082805	rs7618472
chr3	88059504	88086258	chr3_ZNF654+:E004:downstream	chr3	88085179	88085180	rs9845776
chr3	88086401	88113116	chr3_ZNF654+:E005:downstream	chr3	88089865	88089866	rs11128021
chr3	88086401	88113116	chr3_ZNF654+:E005:downstream	chr3	88096301	88096302	rs4429658
chr3	88086401	88113116	chr3_ZNF654+:E005:downstream	chr3	88094363	88094364	rs6792208
chr3	88086401	88113116	chr3_ZNF654+:E005:downstream	chr3	88094582	88094583	rs9310072
chr3	88086401	88113116	chr3_ZNF654+:E005:downstream	chr3	88095919	88095920	rs9310074
chr3	88086401	88113116	chr3_ZNF654+:E005:downstream	chr3	88093909	88093910	rs9881255
chr3	88086401	88113116	chr3_ZNF654+:E005:downstream	chr3	88108033	88108034	rs4858931
chr3	88086401	88113116	chr3_ZNF654+:E005:downstream	chr3	88103188	88103189	rs6551271
chr3	88086401	88113116	chr3_ZNF654+:E005:downstream	chr3	88107558	88107559	rs6787824
chr3	88086401	88113116	chr3_ZNF654+:E005:downstream	chr3	88103725	88103726	rs6804818
chr3	88086401	88113116	chr3_ZNF654+:E005:downstream	chr3	88105938	88105939	rs7620830
chr3	88086401	88113116	chr3_ZNF654+:E005:downstream	chr3	88107149	88107150	rs7651999
chr5	61332947	61467226	chr5_ZSWIM6+:E001:downstream	chr5	61346767	61346768	rs4604142
chr5	61332947	61467226	chr5_ZSWIM6+:E001:downstream	chr5	61346519	61346520	rs6449528
chr5	61332947	61467226	chr5_ZSWIM6+:E001:downstream	chr5	61353640	61353641	rs7724551
chr5	61332947	61467226	chr5_ZSWIM6+:E001:downstream	chr5	61364573	61364574	rs13169711
chr5	61332947	61467226	chr5_ZSWIM6+:E001:downstream	chr5	61416384	61416385	rs6449531
chr5	61332947	61467226	chr5_ZSWIM6+:E001:downstream	chr5	61419618	61419619	rs6449532
chr5	61332947	61467226	chr5_ZSWIM6+:E001:downstream	chr5	61420803	61420804	rs6894675
chr5	61332947	61467226	chr5_ZSWIM6+:E001:downstream	chr5	61415804	61415805	rs7734879
chr5	61332947	61467226	chr5_ZSWIM6+:E001:downstream	chr5	61432162	61432163	rs10939902
chr5	61332947	61467226	chr5_ZSWIM6+:E001:downstream	chr5	61439702	61439703	rs11743711
chr5	61332947	61467226	chr5_ZSWIM6+:E001:downstream	chr5	61439834	61439835	rs11950318
chr5	61332947	61467226	chr5_ZSWIM6+:E001:downstream	chr5	61426816	61426817	rs6449533
chr5	61332947	61467226	chr5_ZSWIM6+:E001:downstream	chr5	61435042	61435043	rs6885005
chr5	61332947	61467226	chr5_ZSWIM6+:E001:downstream	chr5	61435630	61435631	rs7709645
chr5	61332947	61467226	chr5_ZSWIM6+:E001:downstream	chr5	61436724	61436725	rs7714712
chr5	61332947	61467226	chr5_ZSWIM6+:E001:downstream	chr5	61440716	61440717	rs13171757
chr5	61332947	61467226	chr5_ZSWIM6+:E001:downstream	chr5	61451157	61451158	rs1348716
chr5	61332947	61467226	chr5_ZSWIM6+:E001:downstream	chr5	61448511	61448512	rs1445979
chr5	61332947	61467226	chr5_ZSWIM6+:E001:downstream	chr5	61463019	61463020	rs13157657
chr5	61332947	61467226	chr5_ZSWIM6+:E001:downstream	chr5	61464872	61464873	rs1477355
chr5	61332947	61467226	chr5_ZSWIM6+:E001:downstream	chr5	61458591	61458592	rs1986252
chr5	61332947	61467226	chr5_ZSWIM6+:E001:downstream	chr5	61465757	61465758	rs6449535
chr5	61332947	61467226	chr5_ZSWIM6+:E001:downstream	chr5	61457125	61457126	rs6881799
chr5	61332947	61467226	chr5_ZSWIM6+:E001:downstream	chr5	61466244	61466245	rs6882136
chr6	56900620	56953759	chr6_DST-:E122:downstream	chr6	56945740	56945741	rs1020548
chr6	56900620	56953759	chr6_DST-:E122:downstream	chr6	56946325	56946326	rs2817573
chr6	125781370	125786138	chr6_NCOA7+:E004:downstream	chr6	125785426	125785427	rs1028481
chr6	125781370	125786138	chr6_NCOA7+:E004:downstream	chr6	125781834	125781835	rs4897157
chr6	125781370	125786138	chr6_NCOA7+:E004:downstream	chr6	125782971	125782972	rs9401845
chr6	42617506	42619469	chr6_UBR2+:E018:downstream	chr6	42618319	42618320	rs6458299
chr7	6392040	6398663	chr7_RAC1+:E004:downstream	chr7	6398169	6398170	rs6463554
chr7	6392040	6398663	chr7_RAC1+:E004:downstream	chr7	6396213	6396214	rs929926
chr8	73794114	73795792	chr8_UBE2W-:E002:downstream	chr8	73795518	73795519	rs7825326
chr9	33817933	33886882	chr9_UBE2R2+:E002:downstream	chr9	33820939	33820940	rs10971712
chr9	33817933	33886882	chr9_UBE2R2+:E002:downstream	chr9	33827154	33827155	rs10971720
chr9	33817933	33886882	chr9_UBE2R2+:E002:downstream	chr9	33827695	33827696	rs10971721
chr9	33817933	33886882	chr9_UBE2R2+:E002:downstream	chr9	33829603	33829604	rs10971723
chr9	33817933	33886882	chr9_UBE2R2+:E002:downstream	chr9	33834634	33834635	rs10971728
chr9	33817933	33886882	chr9_UBE2R2+:E002:downstream	chr9	33837173	33837174	rs12378261
chr9	33817933	33886882	chr9_UBE2R2+:E002:downstream	chr9	33847587	33847588	rs12380143
chr9	33817933	33886882	chr9_UBE2R2+:E002:downstream	chr9	33851800	33851801	rs10971735
chr9	33817933	33886882	chr9_UBE2R2+:E002:downstream	chr9	33855466	33855467	rs10971739
chr9	33817933	33886882	chr9_UBE2R2+:E002:downstream	chr9	33869782	33869783	rs10971750
chr9	33817933	33886882	chr9_UBE2R2+:E002:downstream	chr9	33870158	33870159	rs10971752
chr9	33817933	33886882	chr9_UBE2R2+:E002:downstream	chr9	33871713	33871714	rs10971754
chr9	33817933	33886882	chr9_UBE2R2+:E002:downstream	chr9	33876070	33876071	rs10971758
chr9	33817933	33886882	chr9_UBE2R2+:E002:downstream	chr9	33870941	33870942	rs7856487
chr9	37260564	37302189	chr9_ZCCHC7+:E015:downstream	chr9	37261657	37261658	rs10973277
chr9	37260564	37302189	chr9_ZCCHC7+:E015:downstream	chr9	37266125	37266126	rs1339553
chr9	37260564	37302189	chr9_ZCCHC7+:E015:downstream	chr9	37261237	37261238	rs7037816
chr9	37260564	37302189	chr9_ZCCHC7+:E015:downstream	chr9	37281055	37281056	rs12380446
chr9	37260564	37302189	chr9_ZCCHC7+:E015:downstream	chr9	37273675	37273676	rs13283411
chr9	37260564	37302189	chr9_ZCCHC7+:E015:downstream	chr9	37279163	37279164	rs1977756
chr9	37260564	37302189	chr9_ZCCHC7+:E015:downstream	chr9	37287407	37287408	rs2790063
chr9	37260564	37302189	chr9_ZCCHC7+:E015:downstream	chr9	37277605	37277606	rs308495
chr9	37260564	37302189	chr9_ZCCHC7+:E015:downstream	chr9	37276263	37276264	rs308496
chr9	37260564	37302189	chr9_ZCCHC7+:E015:downstream	chr9	37298022	37298023	rs308492

## Sheet: T2D obese day 3 vs day 15
exon_chr	exon_start	exon_end	exon_name	snp_chr	snp_start	snp_end	snp_name
chr11	72722357	72726621	chr11_ARAP1-:E034:upstream	chr11	72722874	72722875	11-72433920
chr11	72722357	72726621	chr11_ARAP1-:E034:upstream	chr11	72724937	72724938	11-72435983
chr11	72722357	72726621	chr11_ARAP1-:E034:upstream	chr11	72724950	72724951	11-72435996
chr11	32600831	32601763	chr11_EIF3M+:E013:upstream	chr11	32601754	32601755	11-32623301
chr11	32601821	32602280	chr11_EIF3M+:E014:upstream	chr11	32602074	32602075	11-32623621
chr11	43854863	43855145	chr11_HSD17B12+:E019:upstream	chr11	43854884	43854885	11-43876435
chr13	30463693	30464162	chr13_HMGB1-:E009:upstream	chr13	30463765	30463766	13-31037903
chr16	243899	248349	chr16_FAM234A+:E012:upstream	chr16	244243	244244	16-294243
chr16	243899	248349	chr16_FAM234A+:E012:upstream	chr16	244749	244750	16-294749
chr16	243899	248349	chr16_FAM234A+:E012:upstream	chr16	245117	245118	16-295117
chr16	243899	248349	chr16_FAM234A+:E012:upstream	chr16	245718	245719	16-295718
chr16	243899	248349	chr16_FAM234A+:E012:upstream	chr16	245795	245796	16-295795
chr16	243899	248349	chr16_FAM234A+:E012:upstream	chr16	246184	246185	16-296184
chr16	243899	248349	chr16_FAM234A+:E012:upstream	chr16	247510	247511	16-297510
chr16	243899	248349	chr16_FAM234A+:E012:upstream	chr16	247671	247672	16-297671
chr16	243899	248349	chr16_FAM234A+:E012:upstream	chr16	247750	247751	16-297750
chr17	67826336	67853941	chr17_BPTF+:E004:upstream	chr17	67829131	67829132	17-65825248
chr17	67826336	67853941	chr17_BPTF+:E004:upstream	chr17	67829237	67829238	17-65825354
chr17	67826336	67853941	chr17_BPTF+:E004:upstream	chr17	67829257	67829258	17-65825374
chr17	67826336	67853941	chr17_BPTF+:E004:upstream	chr17	67829973	67829974	17-65826090
chr17	67826336	67853941	chr17_BPTF+:E004:upstream	chr17	67830744	67830745	17-65826861
chr17	67826336	67853941	chr17_BPTF+:E004:upstream	chr17	67831326	67831327	17-65827443
chr17	67826336	67853941	chr17_BPTF+:E004:upstream	chr17	67832254	67832255	17-65828371
chr17	67826336	67853941	chr17_BPTF+:E004:upstream	chr17	67832593	67832594	17-65828710
chr17	67826336	67853941	chr17_BPTF+:E004:upstream	chr17	67833241	67833242	17-65829358
chr17	67826336	67853941	chr17_BPTF+:E004:upstream	chr17	67834165	67834166	17-65830282
chr17	67826336	67853941	chr17_BPTF+:E004:upstream	chr17	67834461	67834462	17-65830578
chr17	67826336	67853941	chr17_BPTF+:E004:upstream	chr17	67835141	67835142	17-65831258
chr17	67826336	67853941	chr17_BPTF+:E004:upstream	chr17	67835899	67835900	17-65832016
chr17	67826336	67853941	chr17_BPTF+:E004:upstream	chr17	67836273	67836274	17-65832390
chr17	67826336	67853941	chr17_BPTF+:E004:upstream	chr17	67836459	67836460	17-65832576
chr17	67826336	67853941	chr17_BPTF+:E004:upstream	chr17	67836885	67836886	17-65833002
chr17	67826336	67853941	chr17_BPTF+:E004:upstream	chr17	67837107	67837108	17-65833224
chr17	67826336	67853941	chr17_BPTF+:E004:upstream	chr17	67837429	67837430	17-65833546
chr17	67826336	67853941	chr17_BPTF+:E004:upstream	chr17	67838620	67838621	17-65834737
chr17	67826336	67853941	chr17_BPTF+:E004:upstream	chr17	67839335	67839336	17-65835452
chr17	67826336	67853941	chr17_BPTF+:E004:upstream	chr17	67839353	67839354	17-65835470
chr17	67826336	67853941	chr17_BPTF+:E004:upstream	chr17	67839500	67839501	17-65835617
chr17	67826336	67853941	chr17_BPTF+:E004:upstream	chr17	67839884	67839885	17-65836001
chr17	67826336	67853941	chr17_BPTF+:E004:upstream	chr17	67840525	67840526	17-65836642
chr17	67826336	67853941	chr17_BPTF+:E004:upstream	chr17	67840942	67840943	17-65837059
chr17	67826336	67853941	chr17_BPTF+:E004:upstream	chr17	67841076	67841077	17-65837193
chr17	67826336	67853941	chr17_BPTF+:E004:upstream	chr17	67841098	67841099	17-65837215
chr17	67826336	67853941	chr17_BPTF+:E004:upstream	chr17	67841118	67841119	17-65837235
chr17	67826336	67853941	chr17_BPTF+:E004:upstream	chr17	67841542	67841543	17-65837659
chr17	67826336	67853941	chr17_BPTF+:E004:upstream	chr17	67841866	67841867	17-65837983
chr17	67826336	67853941	chr17_BPTF+:E004:upstream	chr17	67842626	67842627	17-65838743
chr17	67826336	67853941	chr17_BPTF+:E004:upstream	chr17	67843093	67843094	17-65839210
chr17	67826336	67853941	chr17_BPTF+:E004:upstream	chr17	67843991	67843992	17-65840108
chr17	67826336	67853941	chr17_BPTF+:E004:upstream	chr17	67844127	67844128	17-65840244
chr17	67826336	67853941	chr17_BPTF+:E004:upstream	chr17	67845012	67845013	17-65841129
chr17	67826336	67853941	chr17_BPTF+:E004:upstream	chr17	67845201	67845202	17-65841318
chr17	67826336	67853941	chr17_BPTF+:E004:upstream	chr17	67845899	67845900	17-65842016
chr17	67826336	67853941	chr17_BPTF+:E004:upstream	chr17	67846069	67846070	17-65842186
chr17	67826336	67853941	chr17_BPTF+:E004:upstream	chr17	67846148	67846149	17-65842265
chr17	67826336	67853941	chr17_BPTF+:E004:upstream	chr17	67847208	67847209	17-65843325
chr17	67826336	67853941	chr17_BPTF+:E004:upstream	chr17	67849580	67849581	17-65845697
chr17	67826336	67853941	chr17_BPTF+:E004:upstream	chr17	67849801	67849802	17-65845918
chr17	67826336	67853941	chr17_BPTF+:E004:upstream	chr17	67850943	67850944	17-65847060
chr17	67826336	67853941	chr17_BPTF+:E004:upstream	chr17	67851208	67851209	17-65847325
chr17	67826336	67853941	chr17_BPTF+:E004:upstream	chr17	67852405	67852406	17-65848522
chr17	67826336	67853941	chr17_BPTF+:E004:upstream	chr17	67852877	67852878	17-65848994
chr17	67826336	67853941	chr17_BPTF+:E004:upstream	chr17	67853158	67853159	17-65849275
chr17	67826336	67853941	chr17_BPTF+:E004:upstream	chr17	67853810	67853811	17-65849927
chr17	42412249	42422628	chr17_CAVIN1-:E003:upstream	chr17	42414221	42414222	17-40566240
chr17	42412249	42422628	chr17_CAVIN1-:E003:upstream	chr17	42414731	42414732	17-40566750
chr17	42412249	42422628	chr17_CAVIN1-:E003:upstream	chr17	42418402	42418403	17-40570421
chr17	42412249	42422628	chr17_CAVIN1-:E003:upstream	chr17	42419265	42419266	17-40571284
chr17	48943974	48944682	chr17_SNF8-:E013:upstream	chr17	48944055	48944056	17-47021418
chr17	48943974	48944682	chr17_SNF8-:E013:upstream	chr17	48944065	48944066	17-47021428
chr1	39422899	39424029	chr1_MACF1+:E077:upstream	chr1	39424004	39424005	1-39889677
chr1	39424193	39427456	chr1_MACF1+:E078:upstream	chr1	39427101	39427102	1-39892774
chr1	39424193	39427456	chr1_MACF1+:E078:upstream	chr1	39427420	39427421	1-39893093
chr1	39572585	39575760	chr1_PABPC4-:E018:upstream	chr1	39572898	39572899	1-40038571
chr1	39572585	39575760	chr1_PABPC4-:E018:upstream	chr1	39572924	39572925	1-40038597
chr1	39572585	39575760	chr1_PABPC4-:E018:upstream	chr1	39573263	39573264	1-40038936
chr1	39572585	39575760	chr1_PABPC4-:E018:upstream	chr1	39574034	39574035	1-40039707
chr22	29767606	29769679	chr22_UQCR10+:E003:upstream	chr22	29768379	29768380	22-30164369
chr2	164722521	164727107	chr2_COBLL1-:E014:upstream	chr2	164722648	164722649	2-165579159
chr2	164722521	164727107	chr2_COBLL1-:E014:upstream	chr2	164724264	164724265	2-165580775
chr2	164722521	164727107	chr2_COBLL1-:E014:upstream	chr2	164725196	164725197	2-165581707
chr2	164800553	164841157	chr2_COBLL1-:E019:upstream	chr2	164805991	164805992	2-165662502
chr2	164800553	164841157	chr2_COBLL1-:E019:upstream	chr2	164811132	164811133	2-165667643
chr2	164800553	164841157	chr2_COBLL1-:E019:upstream	chr2	164818227	164818228	2-165674738
chr2	164800553	164841157	chr2_COBLL1-:E019:upstream	chr2	164819182	164819183	2-165675693
chr2	164800553	164841157	chr2_COBLL1-:E019:upstream	chr2	164829135	164829136	2-165685646
chr2	164800553	164841157	chr2_COBLL1-:E019:upstream	chr2	164830675	164830676	2-165687186
chr2	65104805	65129894	chr2_RAB1A-:E006:upstream	chr2	65108898	65108899	2-65336033
chr2	65104805	65129894	chr2_RAB1A-:E006:upstream	chr2	65111287	65111288	2-65338422
chr2	65104805	65129894	chr2_RAB1A-:E006:upstream	chr2	65118596	65118597	2-65345731
chr2	65104805	65129894	chr2_RAB1A-:E006:upstream	chr2	65128609	65128610	2-65355744
chr2	160367390	160407465	chr2_RBMS1-:E017:upstream	chr2	160367718	160367719	2-161224230
chr2	160367390	160407465	chr2_RBMS1-:E017:upstream	chr2	160368146	160368147	2-161224658
chr2	160367390	160407465	chr2_RBMS1-:E017:upstream	chr2	160368734	160368735	2-161225246
chr2	160367390	160407465	chr2_RBMS1-:E017:upstream	chr2	160375504	160375505	2-161232016
chr2	160367390	160407465	chr2_RBMS1-:E017:upstream	chr2	160385783	160385784	2-161242295
chr2	160367390	160407465	chr2_RBMS1-:E017:upstream	chr2	160387561	160387562	2-161244073
chr2	160367390	160407465	chr2_RBMS1-:E017:upstream	chr2	160393603	160393604	2-161250115
chr2	160367390	160407465	chr2_RBMS1-:E017:upstream	chr2	160396055	160396056	2-161252567
chr2	160367390	160407465	chr2_RBMS1-:E017:upstream	chr2	160397684	160397685	2-161254196
chr2	160367390	160407465	chr2_RBMS1-:E017:upstream	chr2	160402770	160402771	2-161259282
chr3	152396223	152414942	chr3_MBNL1+:E024:upstream	chr3	152399514	152399515	3-152117304
chr3	152396223	152414942	chr3_MBNL1+:E024:upstream	chr3	152402186	152402187	3-152119976
chr3	152396223	152414942	chr3_MBNL1+:E024:upstream	chr3	152407968	152407969	3-152125758
chr3	152396223	152414942	chr3_MBNL1+:E024:upstream	chr3	152412200	152412201	3-152129990
chr3	152415110	152432718	chr3_MBNL1+:E025:upstream	chr3	152421595	152421596	3-152139385
chr3	152415110	152432718	chr3_MBNL1+:E025:upstream	chr3	152423248	152423249	3-152141038
chr3	152415110	152432718	chr3_MBNL1+:E025:upstream	chr3	152425664	152425665	3-152143454
chr3	152415110	152432718	chr3_MBNL1+:E025:upstream	chr3	152426755	152426756	3-152144545
chr3	12417153	12433899	chr3_PPARG+:E018:upstream	chr3	12426910	12426911	3-12468410
chr3	12417153	12433899	chr3_PPARG+:E018:upstream	chr3	12431545	12431546	3-12473045
chr3	12169905	12178360	chr3_SYN2+:E017:upstream	chr3	12174630	12174631	3-12216131
chr3	12169905	12178360	chr3_SYN2+:E017:upstream	chr3	12174759	12174760	3-12216260
chr3	12169905	12178360	chr3_SYN2+:E017:upstream	chr3	12176296	12176297	3-12217797
chr3	23271165	23332170	chr3_UBE2E2+:E007:upstream	chr3	23271421	23271422	3-23312913
chr3	23271165	23332170	chr3_UBE2E2+:E007:upstream	chr3	23272238	23272239	3-23313730
chr3	23271165	23332170	chr3_UBE2E2+:E007:upstream	chr3	23272284	23272285	3-23313776
chr3	23271165	23332170	chr3_UBE2E2+:E007:upstream	chr3	23272598	23272599	3-23314090
chr3	23271165	23332170	chr3_UBE2E2+:E007:upstream	chr3	23273047	23273048	3-23314539
chr3	23271165	23332170	chr3_UBE2E2+:E007:upstream	chr3	23273255	23273256	3-23314747
chr3	23271165	23332170	chr3_UBE2E2+:E007:upstream	chr3	23273372	23273373	3-23314864
chr3	23271165	23332170	chr3_UBE2E2+:E007:upstream	chr3	23273706	23273707	3-23315198
chr3	23271165	23332170	chr3_UBE2E2+:E007:upstream	chr3	23274375	23274376	3-23315867
chr3	23271165	23332170	chr3_UBE2E2+:E007:upstream	chr3	23276432	23276433	3-23317924
chr3	23271165	23332170	chr3_UBE2E2+:E007:upstream	chr3	23276652	23276653	3-23318144
chr3	23271165	23332170	chr3_UBE2E2+:E007:upstream	chr3	23280428	23280429	3-23321920
chr3	23271165	23332170	chr3_UBE2E2+:E007:upstream	chr3	23281134	23281135	3-23322626
chr3	23271165	23332170	chr3_UBE2E2+:E007:upstream	chr3	23281659	23281660	3-23323151
chr3	23271165	23332170	chr3_UBE2E2+:E007:upstream	chr3	23283528	23283529	3-23325020
chr3	23271165	23332170	chr3_UBE2E2+:E007:upstream	chr3	23284498	23284499	3-23325990
chr3	23271165	23332170	chr3_UBE2E2+:E007:upstream	chr3	23286750	23286751	3-23328242
chr3	23271165	23332170	chr3_UBE2E2+:E007:upstream	chr3	23288303	23288304	3-23329795
chr3	23271165	23332170	chr3_UBE2E2+:E007:upstream	chr3	23289443	23289444	3-23330935
chr3	23271165	23332170	chr3_UBE2E2+:E007:upstream	chr3	23290460	23290461	3-23331952
chr3	23271165	23332170	chr3_UBE2E2+:E007:upstream	chr3	23291292	23291293	3-23332784
chr3	23271165	23332170	chr3_UBE2E2+:E007:upstream	chr3	23292112	23292113	3-23333604
chr3	23271165	23332170	chr3_UBE2E2+:E007:upstream	chr3	23294958	23294959	3-23336450
chr3	23271165	23332170	chr3_UBE2E2+:E007:upstream	chr3	23295488	23295489	3-23336980
chr3	23271165	23332170	chr3_UBE2E2+:E007:upstream	chr3	23295729	23295730	3-23337221
chr3	23271165	23332170	chr3_UBE2E2+:E007:upstream	chr3	23296313	23296314	3-23337805
chr3	23271165	23332170	chr3_UBE2E2+:E007:upstream	chr3	23296519	23296520	3-23338011
chr3	23271165	23332170	chr3_UBE2E2+:E007:upstream	chr3	23296551	23296552	3-23338043
chr3	23271165	23332170	chr3_UBE2E2+:E007:upstream	chr3	23297614	23297615	3-23339106
chr3	23271165	23332170	chr3_UBE2E2+:E007:upstream	chr3	23298995	23298996	3-23340487
chr3	23271165	23332170	chr3_UBE2E2+:E007:upstream	chr3	23299201	23299202	3-23340693
chr3	23271165	23332170	chr3_UBE2E2+:E007:upstream	chr3	23299376	23299377	3-23340868
chr3	23271165	23332170	chr3_UBE2E2+:E007:upstream	chr3	23301865	23301866	3-23343357
chr3	23271165	23332170	chr3_UBE2E2+:E007:upstream	chr3	23301884	23301885	3-23343376
chr3	23271165	23332170	chr3_UBE2E2+:E007:upstream	chr3	23302891	23302892	3-23344383
chr3	23271165	23332170	chr3_UBE2E2+:E007:upstream	chr3	23303087	23303088	3-23344579
chr3	23271165	23332170	chr3_UBE2E2+:E007:upstream	chr3	23304370	23304371	3-23345862
chr3	23271165	23332170	chr3_UBE2E2+:E007:upstream	chr3	23304554	23304555	3-23346046
chr3	23271165	23332170	chr3_UBE2E2+:E007:upstream	chr3	23305040	23305041	3-23346532
chr3	23271165	23332170	chr3_UBE2E2+:E007:upstream	chr3	23305303	23305304	3-23346795
chr3	23271165	23332170	chr3_UBE2E2+:E007:upstream	chr3	23306190	23306191	3-23347682
chr3	23271165	23332170	chr3_UBE2E2+:E007:upstream	chr3	23308283	23308284	3-23349775
chr3	23271165	23332170	chr3_UBE2E2+:E007:upstream	chr3	23308974	23308975	3-23350466
chr3	23271165	23332170	chr3_UBE2E2+:E007:upstream	chr3	23311077	23311078	3-23352569
chr3	23271165	23332170	chr3_UBE2E2+:E007:upstream	chr3	23312631	23312632	3-23354123
chr3	23271165	23332170	chr3_UBE2E2+:E007:upstream	chr3	23313146	23313147	3-23354638
chr3	23271165	23332170	chr3_UBE2E2+:E007:upstream	chr3	23315799	23315800	3-23357291
chr3	23271165	23332170	chr3_UBE2E2+:E007:upstream	chr3	23318593	23318594	3-23360085
chr3	23271165	23332170	chr3_UBE2E2+:E007:upstream	chr3	23319135	23319136	3-23360627
chr3	23271165	23332170	chr3_UBE2E2+:E007:upstream	chr3	23319971	23319972	3-23361463
chr3	23271165	23332170	chr3_UBE2E2+:E007:upstream	chr3	23322366	23322367	3-23363858
chr3	23271165	23332170	chr3_UBE2E2+:E007:upstream	chr3	23327848	23327849	3-23369340
chr3	23271165	23332170	chr3_UBE2E2+:E007:upstream	chr3	23327868	23327869	3-23369360
chr3	23271165	23332170	chr3_UBE2E2+:E007:upstream	chr3	23328252	23328253	3-23369744
chr3	23271165	23332170	chr3_UBE2E2+:E007:upstream	chr3	23330144	23330145	3-23371636
chr3	23271165	23332170	chr3_UBE2E2+:E007:upstream	chr3	23332154	23332155	3-23373646
chr4	184780432	184783928	chr4_ACSL1-:E019:upstream	chr4	184783044	184783045	4-185704199
chr4	184815123	184825917	chr4_ACSL1-:E031:upstream	chr4	184816688	184816689	4-185737843
chr4	82636822	82659888	chr4_SCD5-:E003:upstream	chr4	82640349	82640350	4-83561503
chr4	82636822	82659888	chr4_SCD5-:E003:upstream	chr4	82642960	82642961	4-83564114
chr4	82636822	82659888	chr4_SCD5-:E003:upstream	chr4	82651796	82651797	4-83572950
chr4	82636822	82659888	chr4_SCD5-:E003:upstream	chr4	82652146	82652147	4-83573300
chr4	82636822	82659888	chr4_SCD5-:E003:upstream	chr4	82654484	82654485	4-83575638
chr4	82636822	82659888	chr4_SCD5-:E003:upstream	chr4	82656081	82656082	4-83577235
chr4	82636822	82659888	chr4_SCD5-:E003:upstream	chr4	82656189	82656190	4-83577343
chr4	82636822	82659888	chr4_SCD5-:E003:upstream	chr4	82656254	82656255	4-83577408
chr4	82636822	82659888	chr4_SCD5-:E003:upstream	chr4	82656785	82656786	4-83577939
chr4	82636822	82659888	chr4_SCD5-:E003:upstream	chr4	82657117	82657118	4-83578271
chr4	82636822	82659888	chr4_SCD5-:E003:upstream	chr4	82657963	82657964	4-83579117
chr4	82636822	82659888	chr4_SCD5-:E003:upstream	chr4	82659473	82659474	4-83580627
chr4	82636822	82659888	chr4_SCD5-:E003:upstream	chr4	82659669	82659670	4-83580823
chr5	75389686	75399311	chr5_COL4A3BP-:E010:upstream	chr5	75393423	75393424	5-74689249
chr5	75389686	75399311	chr5_COL4A3BP-:E010:upstream	chr5	75394478	75394479	5-74690304
chr5	75389686	75399311	chr5_COL4A3BP-:E010:upstream	chr5	75396950	75396951	5-74692776
chr5	77118520	77147653	chr5_ZBED3-AS1+:E004:upstream	chr5	77129123	77129124	5-76424949
chr5	77118520	77147653	chr5_ZBED3-AS1+:E004:upstream	chr5	77129234	77129235	5-76425060
chr5	77118520	77147653	chr5_ZBED3-AS1+:E004:upstream	chr5	77130041	77130042	5-76425867
chr5	77118520	77147653	chr5_ZBED3-AS1+:E004:upstream	chr5	77131485	77131486	5-76427311
chr5	77118520	77147653	chr5_ZBED3-AS1+:E004:upstream	chr5	77134810	77134811	5-76430636
chr5	77118520	77147653	chr5_ZBED3-AS1+:E004:upstream	chr5	77139178	77139179	5-76435004
chr5	77118520	77147653	chr5_ZBED3-AS1+:E004:upstream	chr5	77139520	77139521	5-76435346
chr5	77118520	77147653	chr5_ZBED3-AS1+:E004:upstream	chr5	77143424	77143425	5-76439250
chr6	7189321	7210805	chr6_RREB1+:E009:upstream	chr6	7192400	7192401	6-7192634
chr6	7189321	7210805	chr6_RREB1+:E009:upstream	chr6	7194775	7194776	6-7195009
chr6	7189321	7210805	chr6_RREB1+:E009:upstream	chr6	7203480	7203481	6-7203714
chr6	7189321	7210805	chr6_RREB1+:E009:upstream	chr6	7204502	7204503	6-7204736
chr6	7189321	7210805	chr6_RREB1+:E009:upstream	chr6	7208606	7208607	6-7208840
chr7	157257043	157267586	chr7_UBE3C+:E025:upstream	chr7	157258086	157258087	7-157050781
chr7	157257043	157267586	chr7_UBE3C+:E025:upstream	chr7	157259843	157259844	7-157052538
chr7	157257043	157267586	chr7_UBE3C+:E025:upstream	chr7	157260923	157260924	7-157053618
chr7	157257043	157267586	chr7_UBE3C+:E025:upstream	chr7	157262634	157262635	7-157055329
chr7	157257043	157267586	chr7_UBE3C+:E025:upstream	chr7	157265668	157265669	7-157058363
chr7	157257043	157267586	chr7_UBE3C+:E025:upstream	chr7	157265862	157265863	7-157058557
chr7	157257043	157267586	chr7_UBE3C+:E025:upstream	chr7	157266245	157266246	7-157058940
chr7	157257043	157267586	chr7_UBE3C+:E025:upstream	chr7	157267282	157267283	7-157059977
chr8	8866839	8890062	chr8_MFHAS1-:E005:upstream	chr8	8866904	8866905	8-8724415
chr8	8866839	8890062	chr8_MFHAS1-:E005:upstream	chr8	8867615	8867616	8-8725126
chr8	8866839	8890062	chr8_MFHAS1-:E005:upstream	chr8	8867718	8867719	8-8725229
chr8	8866839	8890062	chr8_MFHAS1-:E005:upstream	chr8	8867808	8867809	8-8725319
chr8	8866839	8890062	chr8_MFHAS1-:E005:upstream	chr8	8871682	8871683	8-8729193
chr8	8866839	8890062	chr8_MFHAS1-:E005:upstream	chr8	8872250	8872251	8-8729761
chr8	8866839	8890062	chr8_MFHAS1-:E005:upstream	chr8	8872977	8872978	8-8730488
chr11	32601821	32602280	chr11_EIF3M+:E013:downstream	chr11	32602074	32602075	11-32623621
chr11	65554379	65557630	chr11_LTBP3-:E030:downstream	chr11	65555076	65555077	11-65322548
chr11	65554379	65557630	chr11_LTBP3-:E030:downstream	chr11	65556253	65556254	11-65323725
chr11	65444456	65444559	chr11_NEAT1+:E002:downstream	chr11	65444507	65444508	11-65211979
chr11	14645052	14771938	chr11_PDE3B+:E003:downstream	chr11	14649849	14649850	11-14671396
chr11	14645052	14771938	chr11_PDE3B+:E003:downstream	chr11	14710119	14710120	11-14731666
chr11	14645052	14771938	chr11_PDE3B+:E003:downstream	chr11	14742281	14742282	11-14763828
chr16	29971577	29972043	chr16_TMEM219+:E011:downstream	chr16	29971639	29971640	16-29982961
chr16	29971577	29972043	chr16_TMEM219+:E011:downstream	chr16	29971797	29971798	16-29983119
chr16	29971577	29972043	chr16_TMEM219+:E011:downstream	chr16	29971826	29971827	16-29983148
chr17	67854761	67866465	chr17_BPTF+:E004:downstream	chr17	67855856	67855857	17-65851973
chr17	67854761	67866465	chr17_BPTF+:E004:downstream	chr17	67856790	67856791	17-65852907
chr17	67854761	67866465	chr17_BPTF+:E004:downstream	chr17	67857246	67857247	17-65853363
chr17	67854761	67866465	chr17_BPTF+:E004:downstream	chr17	67857320	67857321	17-65853437
chr17	67854761	67866465	chr17_BPTF+:E004:downstream	chr17	67857400	67857401	17-65853517
chr17	67854761	67866465	chr17_BPTF+:E004:downstream	chr17	67857534	67857535	17-65853651
chr17	67854761	67866465	chr17_BPTF+:E004:downstream	chr17	67857642	67857643	17-65853759
chr17	67854761	67866465	chr17_BPTF+:E004:downstream	chr17	67858987	67858988	17-65855104
chr17	67854761	67866465	chr17_BPTF+:E004:downstream	chr17	67860456	67860457	17-65856573
chr17	67854761	67866465	chr17_BPTF+:E004:downstream	chr17	67861060	67861061	17-65857177
chr17	67854761	67866465	chr17_BPTF+:E004:downstream	chr17	67861597	67861598	17-65857714
chr17	67854761	67866465	chr17_BPTF+:E004:downstream	chr17	67863116	67863117	17-65859233
chr17	67854761	67866465	chr17_BPTF+:E004:downstream	chr17	67864290	67864291	17-65860407
chr17	67854761	67866465	chr17_BPTF+:E004:downstream	chr17	67864742	67864743	17-65860859
chr17	67854761	67866465	chr17_BPTF+:E004:downstream	chr17	67864942	67864943	17-65861059
chr17	17823663	17836728	chr17_SREBF1-:E029:downstream	chr17	17824628	17824629	17-17727943
chr17	17823663	17836728	chr17_SREBF1-:E029:downstream	chr17	17824728	17824729	17-17728043
chr17	17823663	17836728	chr17_SREBF1-:E029:downstream	chr17	17825259	17825260	17-17728574
chr17	17823663	17836728	chr17_SREBF1-:E029:downstream	chr17	17825668	17825669	17-17728983
chr17	17823663	17836728	chr17_SREBF1-:E029:downstream	chr17	17827885	17827886	17-17731200
chr17	17823663	17836728	chr17_SREBF1-:E029:downstream	chr17	17828336	17828337	17-17731651
chr17	17823663	17836728	chr17_SREBF1-:E029:downstream	chr17	17829004	17829005	17-17732319
chr17	17823663	17836728	chr17_SREBF1-:E029:downstream	chr17	17830445	17830446	17-17733760
chr17	17823663	17836728	chr17_SREBF1-:E029:downstream	chr17	17830511	17830512	17-17733826
chr17	17823663	17836728	chr17_SREBF1-:E029:downstream	chr17	17830619	17830620	17-17733934
chr17	17823663	17836728	chr17_SREBF1-:E029:downstream	chr17	17831425	17831426	17-17734740
chr17	17823663	17836728	chr17_SREBF1-:E029:downstream	chr17	17832937	17832938	17-17736252
chr17	17823663	17836728	chr17_SREBF1-:E029:downstream	chr17	17833943	17833944	17-17737258
chr1	39084437	39105380	chr1_MACF1+:E006:downstream	chr1	39084948	39084949	1-39550621
chr1	39084437	39105380	chr1_MACF1+:E006:downstream	chr1	39085815	39085816	1-39551488
chr1	39084437	39105380	chr1_MACF1+:E006:downstream	chr1	39087290	39087291	1-39552963
chr1	39084437	39105380	chr1_MACF1+:E006:downstream	chr1	39088361	39088362	1-39554034
chr1	39084437	39105380	chr1_MACF1+:E006:downstream	chr1	39094577	39094578	1-39560250
chr1	39084437	39105380	chr1_MACF1+:E006:downstream	chr1	39096954	39096955	1-39562627
chr1	39084437	39105380	chr1_MACF1+:E006:downstream	chr1	39099257	39099258	1-39564930
chr1	39084437	39105380	chr1_MACF1+:E006:downstream	chr1	39101093	39101094	1-39566766
chr1	39084437	39105380	chr1_MACF1+:E006:downstream	chr1	39103898	39103899	1-39569571
chr1	39422899	39424029	chr1_MACF1+:E076:downstream	chr1	39424004	39424005	1-39889677
chr1	39424193	39427456	chr1_MACF1+:E077:downstream	chr1	39427101	39427102	1-39892774
chr1	39424193	39427456	chr1_MACF1+:E077:downstream	chr1	39427420	39427421	1-39893093
chr2	164727143	164727970	chr2_COBLL1-:E014:downstream	chr2	164727896	164727897	2-165584407
chr3	152415110	152432718	chr3_MBNL1+:E024:downstream	chr3	152421595	152421596	3-152139385
chr3	152415110	152432718	chr3_MBNL1+:E024:downstream	chr3	152423248	152423249	3-152141038
chr3	152415110	152432718	chr3_MBNL1+:E024:downstream	chr3	152425664	152425665	3-152143454
chr3	152415110	152432718	chr3_MBNL1+:E024:downstream	chr3	152426755	152426756	3-152144545
chr3	152432919	152445283	chr3_MBNL1+:E025:downstream	chr3	152437496	152437497	3-152155286
chr3	152432919	152445283	chr3_MBNL1+:E025:downstream	chr3	152438593	152438594	3-152156383
chr3	152432919	152445283	chr3_MBNL1+:E025:downstream	chr3	152443065	152443066	3-152160855
chr3	12312452	12349470	chr3_PPARG+:E008:downstream	chr3	12312493	12312494	3-12353993
chr3	12312452	12349470	chr3_PPARG+:E008:downstream	chr3	12314658	12314659	3-12356158
chr3	12312452	12349470	chr3_PPARG+:E008:downstream	chr3	12314696	12314697	3-12356196
chr3	12312452	12349470	chr3_PPARG+:E008:downstream	chr3	12314887	12314888	3-12356387
chr3	12312452	12349470	chr3_PPARG+:E008:downstream	chr3	12315105	12315106	3-12356605
chr3	12312452	12349470	chr3_PPARG+:E008:downstream	chr3	12315125	12315126	3-12356625
chr3	12312452	12349470	chr3_PPARG+:E008:downstream	chr3	12316730	12316731	3-12358230
chr3	12312452	12349470	chr3_PPARG+:E008:downstream	chr3	12316992	12316993	3-12358492
chr3	12312452	12349470	chr3_PPARG+:E008:downstream	chr3	12317549	12317550	3-12359049
chr3	12312452	12349470	chr3_PPARG+:E008:downstream	chr3	12318714	12318715	3-12360214
chr3	12312452	12349470	chr3_PPARG+:E008:downstream	chr3	12319269	12319270	3-12360769
chr3	12312452	12349470	chr3_PPARG+:E008:downstream	chr3	12319795	12319796	3-12361295
chr3	12312452	12349470	chr3_PPARG+:E008:downstream	chr3	12319885	12319886	3-12361385
chr3	12312452	12349470	chr3_PPARG+:E008:downstream	chr3	12320429	12320430	3-12361929
chr3	12312452	12349470	chr3_PPARG+:E008:downstream	chr3	12322137	12322138	3-12363637
chr3	12312452	12349470	chr3_PPARG+:E008:downstream	chr3	12322913	12322914	3-12364413
chr3	12312452	12349470	chr3_PPARG+:E008:downstream	chr3	12323203	12323204	3-12364703
chr3	12312452	12349470	chr3_PPARG+:E008:downstream	chr3	12323808	12323809	3-12365308
chr3	12312452	12349470	chr3_PPARG+:E008:downstream	chr3	12325563	12325564	3-12367063
chr3	12312452	12349470	chr3_PPARG+:E008:downstream	chr3	12325605	12325606	3-12367105
chr3	12312452	12349470	chr3_PPARG+:E008:downstream	chr3	12326733	12326734	3-12368233
chr3	12312452	12349470	chr3_PPARG+:E008:downstream	chr3	12327901	12327902	3-12369401
chr3	12312452	12349470	chr3_PPARG+:E008:downstream	chr3	12328583	12328584	3-12370083
chr3	12312452	12349470	chr3_PPARG+:E008:downstream	chr3	12329582	12329583	3-12371082
chr3	12312452	12349470	chr3_PPARG+:E008:downstream	chr3	12330128	12330129	3-12371628
chr3	12312452	12349470	chr3_PPARG+:E008:downstream	chr3	12330574	12330575	3-12372074
chr3	12312452	12349470	chr3_PPARG+:E008:downstream	chr3	12330886	12330887	3-12372386
chr3	12312452	12349470	chr3_PPARG+:E008:downstream	chr3	12331382	12331383	3-12372882
chr3	12312452	12349470	chr3_PPARG+:E008:downstream	chr3	12331923	12331924	3-12373423
chr3	12312452	12349470	chr3_PPARG+:E008:downstream	chr3	12332167	12332168	3-12373667
chr3	12312452	12349470	chr3_PPARG+:E008:downstream	chr3	12332278	12332279	3-12373778
chr3	12312452	12349470	chr3_PPARG+:E008:downstream	chr3	12333891	12333892	3-12375391
chr3	12312452	12349470	chr3_PPARG+:E008:downstream	chr3	12334456	12334457	3-12375956
chr3	12312452	12349470	chr3_PPARG+:E008:downstream	chr3	12334914	12334915	3-12376414
chr3	12312452	12349470	chr3_PPARG+:E008:downstream	chr3	12335245	12335246	3-12376745
chr3	12312452	12349470	chr3_PPARG+:E008:downstream	chr3	12335794	12335795	3-12377294
chr3	12312452	12349470	chr3_PPARG+:E008:downstream	chr3	12335844	12335845	3-12377344
chr3	12312452	12349470	chr3_PPARG+:E008:downstream	chr3	12337423	12337424	3-12378923
chr3	12312452	12349470	chr3_PPARG+:E008:downstream	chr3	12337851	12337852	3-12379351
chr3	12312452	12349470	chr3_PPARG+:E008:downstream	chr3	12338001	12338002	3-12379501
chr3	12312452	12349470	chr3_PPARG+:E008:downstream	chr3	12338408	12338409	3-12379908
chr3	12312452	12349470	chr3_PPARG+:E008:downstream	chr3	12339665	12339666	3-12381165
chr3	12312452	12349470	chr3_PPARG+:E008:downstream	chr3	12339910	12339911	3-12381410
chr3	12312452	12349470	chr3_PPARG+:E008:downstream	chr3	12341765	12341766	3-12383265
chr3	12312452	12349470	chr3_PPARG+:E008:downstream	chr3	12342214	12342215	3-12383714
chr3	12312452	12349470	chr3_PPARG+:E008:downstream	chr3	12344328	12344329	3-12385828
chr3	12312452	12349470	chr3_PPARG+:E008:downstream	chr3	12344837	12344838	3-12386337
chr3	12312452	12349470	chr3_PPARG+:E008:downstream	chr3	12346909	12346910	3-12388409
chr3	12312452	12349470	chr3_PPARG+:E008:downstream	chr3	12347813	12347814	3-12389313
chr3	12312452	12349470	chr3_PPARG+:E008:downstream	chr3	12348984	12348985	3-12390484
chr3	12351673	12379705	chr3_PPARG+:E011:downstream	chr3	12352182	12352183	3-12393682
chr3	12351673	12379705	chr3_PPARG+:E011:downstream	chr3	12353340	12353341	3-12394840
chr3	12351673	12379705	chr3_PPARG+:E011:downstream	chr3	12354145	12354146	3-12395645
chr3	12351673	12379705	chr3_PPARG+:E011:downstream	chr3	12354458	12354459	3-12395958
chr3	12351673	12379705	chr3_PPARG+:E011:downstream	chr3	12355088	12355089	3-12396588
chr3	12351673	12379705	chr3_PPARG+:E011:downstream	chr3	12355345	12355346	3-12396845
chr3	12351673	12379705	chr3_PPARG+:E011:downstream	chr3	12355413	12355414	3-12396913
chr3	12351673	12379705	chr3_PPARG+:E011:downstream	chr3	12355455	12355456	3-12396955
chr3	12351673	12379705	chr3_PPARG+:E011:downstream	chr3	12371839	12371840	3-12413339
chr3	12417153	12433899	chr3_PPARG+:E017:downstream	chr3	12426910	12426911	3-12468410
chr3	12417153	12433899	chr3_PPARG+:E017:downstream	chr3	12431545	12431546	3-12473045
chr3	12179397	12183313	chr3_SYN2+:E017:downstream	chr3	12179923	12179924	3-12221424
chr3	23343231	23345867	chr3_UBE2E2+:E007:downstream	chr3	23343716	23343717	3-23385208
chr3	23343231	23345867	chr3_UBE2E2+:E007:downstream	chr3	23344385	23344386	3-23385877
chr3	23343231	23345867	chr3_UBE2E2+:E007:downstream	chr3	23344450	23344451	3-23385942
chr3	23343231	23345867	chr3_UBE2E2+:E007:downstream	chr3	23344804	23344805	3-23386296
chr3	23343231	23345867	chr3_UBE2E2+:E007:downstream	chr3	23345079	23345080	3-23386571
chr3	23343231	23345867	chr3_UBE2E2+:E007:downstream	chr3	23345388	23345389	3-23386880
chr3	23343231	23345867	chr3_UBE2E2+:E007:downstream	chr3	23345453	23345454	3-23386945
chr3	23343231	23345867	chr3_UBE2E2+:E007:downstream	chr3	23345464	23345465	3-23386956
chr3	23343231	23345867	chr3_UBE2E2+:E007:downstream	chr3	23345521	23345522	3-23387013
chr4	184783990	184788380	chr4_ACSL1-:E019:downstream	chr4	184787652	184787653	4-185708807
chr4	184783990	184788380	chr4_ACSL1-:E019:downstream	chr4	184787756	184787757	4-185708911
chr4	82661076	82680708	chr4_SCD5-:E003:downstream	chr4	82661392	82661393	4-83582546
chr4	82661076	82680708	chr4_SCD5-:E003:downstream	chr4	82661411	82661412	4-83582565
chr4	82661076	82680708	chr4_SCD5-:E003:downstream	chr4	82661927	82661928	4-83583081
chr4	82661076	82680708	chr4_SCD5-:E003:downstream	chr4	82663342	82663343	4-83584496
chr4	82661076	82680708	chr4_SCD5-:E003:downstream	chr4	82663407	82663408	4-83584561
chr4	82661076	82680708	chr4_SCD5-:E003:downstream	chr4	82663999	82664000	4-83585153
chr4	82661076	82680708	chr4_SCD5-:E003:downstream	chr4	82666408	82666409	4-83587562
chr4	82661076	82680708	chr4_SCD5-:E003:downstream	chr4	82668118	82668119	4-83589272
chr5	103009865	103017335	chr5_PAM+:E030:downstream	chr5	103010211	103010212	5-102345916
chr5	103009865	103017335	chr5_PAM+:E030:downstream	chr5	103011161	103011162	5-102346866
chr5	103009865	103017335	chr5_PAM+:E030:downstream	chr5	103011747	103011748	5-102347452
chr5	103009865	103017335	chr5_PAM+:E030:downstream	chr5	103013957	103013958	5-102349662
chr5	103009865	103017335	chr5_PAM+:E030:downstream	chr5	103014265	103014266	5-102349970
chr5	103009865	103017335	chr5_PAM+:E030:downstream	chr5	103014766	103014767	5-102350471
chr5	103009865	103017335	chr5_PAM+:E030:downstream	chr5	103015614	103015615	5-102351319
chr5	103009865	103017335	chr5_PAM+:E030:downstream	chr5	103016329	103016330	5-102352034
chr5	103009865	103017335	chr5_PAM+:E030:downstream	chr5	103017013	103017014	5-102352718
chr6	7210947	7211574	chr6_RREB1+:E009:downstream	chr6	7211517	7211518	6-7211751

## Sheet: BMI obese T2D conf vs day 3
exon_chr	exon_start	exon_end	exon_name	snp_chr	snp_start	snp_end	snp_name
chr10	75883524	76036009	chr10_LRMDA+:E007:upstream	chr10	75885470	75885471	rs10824347
chr10	75883524	76036009	chr10_LRMDA+:E007:upstream	chr10	75885747	75885748	rs11001535
chr10	75883524	76036009	chr10_LRMDA+:E007:upstream	chr10	75887348	75887349	rs7099048
chr10	75883524	76036009	chr10_LRMDA+:E007:upstream	chr10	75888444	75888445	rs7895205
chr10	75883524	76036009	chr10_LRMDA+:E007:upstream	chr10	75886794	75886795	rs9415126
chr10	75883524	76036009	chr10_LRMDA+:E007:upstream	chr10	75896050	75896051	rs10762683
chr10	75883524	76036009	chr10_LRMDA+:E007:upstream	chr10	75896212	75896213	rs10762684
chr10	75883524	76036009	chr10_LRMDA+:E007:upstream	chr10	75896262	75896263	rs10762685
chr10	75883524	76036009	chr10_LRMDA+:E007:upstream	chr10	75899484	75899485	rs10762686
chr10	75883524	76036009	chr10_LRMDA+:E007:upstream	chr10	75892155	75892156	rs1998455
chr10	75883524	76036009	chr10_LRMDA+:E007:upstream	chr10	75900405	75900406	rs2038656
chr10	75883524	76036009	chr10_LRMDA+:E007:upstream	chr10	75896750	75896751	rs4746339
chr10	75883524	76036009	chr10_LRMDA+:E007:upstream	chr10	75892422	75892423	rs6480793
chr10	91248723	91251293	chr10_PCGF5+:E015:upstream	chr10	91250625	91250626	rs2450444
chr10	91271696	91278270	chr10_PCGF5+:E019:upstream	chr10	91273185	91273186	rs2631681
chr11	122066433	122089104	chr11_MIR100HG-:E005:upstream	chr11	122071803	122071804	rs4936671
chr11	8457478	8461806	chr11_STK33-:E014:upstream	chr11	8461787	8461788	rs1900273
chr11	8655559	8658154	chr11_TRIM66-:E041:upstream	chr11	8657468	8657469	rs2316901
chr11	8655559	8658154	chr11_TRIM66-:E041:upstream	chr11	8657208	8657209	rs885114
chr12	754323	813643	chr12_WNK1+:E005:upstream	chr12	780735	780736	rs11064524
chr12	754323	813643	chr12_WNK1+:E005:upstream	chr12	793912	793913	rs2107614
chr12	754323	813643	chr12_WNK1+:E005:upstream	chr12	799116	799117	rs765250
chr17	2304016	2306034	chr17_SRR+:E004:upstream	chr17	2305604	2305605	rs4523957
chr1	39084437	39105380	chr1_MACF1+:E007:upstream	chr1	39103898	39103899	rs2282231
chr1	39159019	39204303	chr1_MACF1+:E009:upstream	chr1	39174071	39174072	rs1126313
chr1	39159019	39204303	chr1_MACF1+:E009:upstream	chr1	39173980	39173981	rs1537817
chr1	39159019	39204303	chr1_MACF1+:E009:upstream	chr1	39177709	39177710	rs16825887
chr1	39159019	39204303	chr1_MACF1+:E009:upstream	chr1	39196835	39196836	rs16825939
chr1	39254374	39257937	chr1_MACF1+:E018:upstream	chr1	39256541	39256542	rs4660208
chr1	39258027	39268466	chr1_MACF1+:E019:upstream	chr1	39265877	39265878	rs4660214
chr1	39269719	39282209	chr1_MACF1+:E020:upstream	chr1	39270661	39270662	rs4660603
chr1	39282373	39283190	chr1_MACF1+:E021:upstream	chr1	39282598	39282599	rs3818806
chr1	39347209	39349479	chr1_MACF1+:E057:upstream	chr1	39349287	39349288	rs3754346
chr1	39429325	39429828	chr1_MACF1+:E081:upstream	chr1	39429608	39429609	rs682571
chr1	39430907	39432536	chr1_MACF1+:E083:upstream	chr1	39431598	39431599	rs599823
chr1	39439499	39441004	chr1_MACF1+:E090:upstream	chr1	39439915	39439916	rs2018212
chr1	39444834	39447433	chr1_MACF1+:E098:upstream	chr1	39445011	39445012	rs617577
chr1	39447586	39447693	chr1_MACF1+:E099:upstream	chr1	39447678	39447679	rs2296173
chr1	1765445	1778290	chr1_NADK-:E022:upstream	chr1	1777361	1777362	rs12044597
chr1	8624379	8655974	chr1_RERE-:E025:upstream	chr1	8630873	8630874	rs1381928
chr1	8624379	8655974	chr1_RERE-:E025:upstream	chr1	8648469	8648470	rs11121210
chr1	8624379	8655974	chr1_RERE-:E025:upstream	chr1	8641171	8641172	rs1463052
chr1	8624379	8655974	chr1_RERE-:E025:upstream	chr1	8644977	8644978	rs1463053
chr1	8624379	8655974	chr1_RERE-:E025:upstream	chr1	8643999	8644000	rs2401138
chr1	8624379	8655974	chr1_RERE-:E025:upstream	chr1	8642693	8642694	rs6577513
chr1	8624379	8655974	chr1_RERE-:E025:upstream	chr1	8638217	8638218	rs7520025
chr20	49280963	49289046	chr20_ZFAS1+:E008:upstream	chr20	49286481	49286482	rs237743
chr2	171541792	171553347	chr2_CYBRD1+:E005:upstream	chr2	171552754	171552755	rs17222641
chr2	171553499	171554525	chr2_CYBRD1+:E006:upstream	chr2	171553675	171553676	rs17288588
chr2	28752175	28776852	chr2_PPP1CB+:E004:upstream	chr2	28759163	28759164	rs6547874
chr2	28752175	28776852	chr2_PPP1CB+:E004:upstream	chr2	28765216	28765217	rs6707848
chr2	28752175	28776852	chr2_PPP1CB+:E004:upstream	chr2	28772359	28772360	rs10183665
chr2	28752175	28776852	chr2_PPP1CB+:E004:upstream	chr2	28773428	28773429	rs7579277
chr2	28752175	28776852	chr2_PPP1CB+:E004:upstream	chr2	28774134	28774135	rs7580078
chr2	36787275	36801302	chr2_VIT+:E017:upstream	chr2	36793946	36793947	rs11677279
chr2	36787275	36801302	chr2_VIT+:E017:upstream	chr2	36797569	36797570	rs12987048
chr2	36787275	36801302	chr2_VIT+:E017:upstream	chr2	36795900	36795901	rs4670169
chr3	136928226	136930476	chr3_NCK1+:E005:upstream	chr3	136928403	136928404	rs3772388
chr3	136928226	136930476	chr3_NCK1+:E005:upstream	chr3	136928964	136928965	rs3856623
chr3	11610503	11643438	chr3_VGLL4-:E011:upstream	chr3	11613729	11613730	rs17833547
chr4	145125100	145127527	chr4_ABCE1+:E020:upstream	chr4	145127401	145127402	rs4148234
chr4	79907466	79976192	chr4_ANTXR2-:E003:upstream	chr4	79907966	79907967	rs6534642
chr5	96742755	96743541	chr5_CAST+:E022:upstream	chr5	96743322	96743323	rs26504
chr5	158942881	159052780	chr5_EBF1-:E023:upstream	chr5	158977120	158977121	rs2161356
chr5	158942881	159052780	chr5_EBF1-:E023:upstream	chr5	159003866	159003867	rs869593
chr6	125781370	125786138	chr6_NCOA7+:E005:upstream	chr6	125785426	125785427	rs1028481
chr6	125781370	125786138	chr6_NCOA7+:E005:upstream	chr6	125781834	125781835	rs4897157
chr6	125781370	125786138	chr6_NCOA7+:E005:upstream	chr6	125782971	125782972	rs9401845
chr10	85729613	85854497	chr10_GRID1-:E010:downstream	chr10	85793651	85793652	rs1106789
chr10	85729613	85854497	chr10_GRID1-:E010:downstream	chr10	85799755	85799756	rs4031530
chr10	85729613	85854497	chr10_GRID1-:E010:downstream	chr10	85803147	85803148	rs12252417
chr10	85729613	85854497	chr10_GRID1-:E010:downstream	chr10	85806146	85806147	rs12253513
chr10	85729613	85854497	chr10_GRID1-:E010:downstream	chr10	85804746	85804747	rs12256239
chr10	85729613	85854497	chr10_GRID1-:E010:downstream	chr10	85814808	85814809	rs7902997
chr10	85729613	85854497	chr10_GRID1-:E010:downstream	chr10	85829395	85829396	rs1917147
chr10	85729613	85854497	chr10_GRID1-:E010:downstream	chr10	85825731	85825732	rs7071693
chr10	85729613	85854497	chr10_GRID1-:E010:downstream	chr10	85846859	85846860	rs11818522
chr10	85729613	85854497	chr10_GRID1-:E010:downstream	chr10	85851556	85851557	rs17400856
chr10	85729613	85854497	chr10_GRID1-:E010:downstream	chr10	85843693	85843694	rs1917152
chr10	85729613	85854497	chr10_GRID1-:E010:downstream	chr10	85852185	85852186	rs1880386
chr10	85729613	85854497	chr10_GRID1-:E010:downstream	chr10	85853325	85853326	rs7895144
chr11	122066433	122089104	chr11_MIR100HG-:E004:downstream	chr11	122071803	122071804	rs4936671
chr11	8461908	8464710	chr11_STK33-:E014:downstream	chr11	8462541	8462542	rs10769908
chr11	122656209	122771498	chr11_UBASH3B+:E002:downstream	chr11	122664699	122664700	rs10790519
chr11	122656209	122771498	chr11_UBASH3B+:E002:downstream	chr11	122664902	122664903	rs11606532
chr11	122656209	122771498	chr11_UBASH3B+:E002:downstream	chr11	122659882	122659883	rs7115089
chr11	122656209	122771498	chr11_UBASH3B+:E002:downstream	chr11	122663795	122663796	rs7117842
chr11	122656209	122771498	chr11_UBASH3B+:E002:downstream	chr11	122682430	122682431	rs949300
chr15	67408474	67421336	chr15_IQCH-AS1-:E001:downstream	chr15	67409156	67409157	rs2286664
chr15	67408474	67421336	chr15_IQCH-AS1-:E001:downstream	chr15	67410568	67410569	rs7359257
chr16	31065087	31072741	chr16_ZNF668-:E006:downstream	chr16	31072002	31072003	rs6565217
chr16	31065087	31072741	chr16_ZNF668-:E006:downstream	chr16	31068049	31068050	rs881929
chr1	39084437	39105380	chr1_MACF1+:E006:downstream	chr1	39103898	39103899	rs2282231
chr1	39105716	39157947	chr1_MACF1+:E007:downstream	chr1	39112859	39112860	rs4660165
chr1	39105716	39157947	chr1_MACF1+:E007:downstream	chr1	39126106	39126107	rs4660443
chr1	39205130	39213762	chr1_MACF1+:E009:downstream	chr1	39213317	39213318	rs4660543
chr1	39258027	39268466	chr1_MACF1+:E018:downstream	chr1	39265877	39265878	rs4660214
chr1	39269719	39282209	chr1_MACF1+:E019:downstream	chr1	39270661	39270662	rs4660603
chr1	39282373	39283190	chr1_MACF1+:E020:downstream	chr1	39282598	39282599	rs3818806
chr1	39324733	39327219	chr1_MACF1+:E048:downstream	chr1	39326203	39326204	rs16826068
chr1	39347209	39349479	chr1_MACF1+:E056:downstream	chr1	39349287	39349288	rs3754346
chr1	39388657	39422375	chr1_MACF1+:E074:downstream	chr1	39414646	39414647	rs3768302
chr1	39429325	39429828	chr1_MACF1+:E080:downstream	chr1	39429608	39429609	rs682571
chr1	39430907	39432536	chr1_MACF1+:E082:downstream	chr1	39431598	39431599	rs599823
chr1	39439499	39441004	chr1_MACF1+:E089:downstream	chr1	39439915	39439916	rs2018212
chr1	39444834	39447433	chr1_MACF1+:E097:downstream	chr1	39445011	39445012	rs617577
chr1	39447586	39447693	chr1_MACF1+:E098:downstream	chr1	39447678	39447679	rs2296173
chr1	45608336	45613170	chr1_NASP+:E010:downstream	chr1	45612957	45612958	rs2050376
chr1	65918834	65992617	chr1_PDE4B+:E005:downstream	chr1	65921803	65921804	rs17451403
chr1	65918834	65992617	chr1_PDE4B+:E005:downstream	chr1	65926721	65926722	rs2310752
chr1	65918834	65992617	chr1_PDE4B+:E005:downstream	chr1	65925124	65925125	rs4655591
chr1	65918834	65992617	chr1_PDE4B+:E005:downstream	chr1	65923413	65923414	rs4655809
chr1	65918834	65992617	chr1_PDE4B+:E005:downstream	chr1	65944425	65944426	rs11208774
chr1	65918834	65992617	chr1_PDE4B+:E005:downstream	chr1	65944857	65944858	rs11208775
chr1	65918834	65992617	chr1_PDE4B+:E005:downstream	chr1	65936740	65936741	rs12058296
chr1	65918834	65992617	chr1_PDE4B+:E005:downstream	chr1	65942016	65942017	rs12088813
chr1	65918834	65992617	chr1_PDE4B+:E005:downstream	chr1	65937408	65937409	rs2310754
chr1	65918834	65992617	chr1_PDE4B+:E005:downstream	chr1	65934211	65934212	rs4255357
chr1	65918834	65992617	chr1_PDE4B+:E005:downstream	chr1	65941123	65941124	rs4503327
chr1	65918834	65992617	chr1_PDE4B+:E005:downstream	chr1	65941668	65941669	rs7528604
chr1	65918834	65992617	chr1_PDE4B+:E005:downstream	chr1	65941712	65941713	rs7550837
chr1	65918834	65992617	chr1_PDE4B+:E005:downstream	chr1	65960416	65960417	rs10789205
chr1	65918834	65992617	chr1_PDE4B+:E005:downstream	chr1	65949797	65949798	rs10889590
chr1	65918834	65992617	chr1_PDE4B+:E005:downstream	chr1	65946049	65946050	rs11208776
chr1	65918834	65992617	chr1_PDE4B+:E005:downstream	chr1	65949351	65949352	rs12729364
chr1	65918834	65992617	chr1_PDE4B+:E005:downstream	chr1	65960567	65960568	rs12760902
chr1	65918834	65992617	chr1_PDE4B+:E005:downstream	chr1	65955922	65955923	rs17417915
chr1	65918834	65992617	chr1_PDE4B+:E005:downstream	chr1	65951503	65951504	rs1937454
chr1	65918834	65992617	chr1_PDE4B+:E005:downstream	chr1	65951255	65951256	rs1937455
chr1	65918834	65992617	chr1_PDE4B+:E005:downstream	chr1	65951063	65951064	rs1937456
chr1	65918834	65992617	chr1_PDE4B+:E005:downstream	chr1	65950625	65950626	rs1937458
chr1	65918834	65992617	chr1_PDE4B+:E005:downstream	chr1	65945716	65945717	rs3009872
chr1	65918834	65992617	chr1_PDE4B+:E005:downstream	chr1	65954221	65954222	rs6421482
chr1	65918834	65992617	chr1_PDE4B+:E005:downstream	chr1	65948756	65948757	rs6680334
chr1	65918834	65992617	chr1_PDE4B+:E005:downstream	chr1	65947076	65947077	rs7527901
chr1	65918834	65992617	chr1_PDE4B+:E005:downstream	chr1	65948047	65948048	rs7531270
chr1	65918834	65992617	chr1_PDE4B+:E005:downstream	chr1	65948281	65948282	rs7543245
chr1	65918834	65992617	chr1_PDE4B+:E005:downstream	chr1	65962885	65962886	rs12062815
chr1	65918834	65992617	chr1_PDE4B+:E005:downstream	chr1	65963104	65963105	rs12062901
chr1	65918834	65992617	chr1_PDE4B+:E005:downstream	chr1	65965333	65965334	rs12562632
chr1	65918834	65992617	chr1_PDE4B+:E005:downstream	chr1	65962818	65962819	rs12743648
chr1	65918834	65992617	chr1_PDE4B+:E005:downstream	chr1	65964508	65964509	rs1318475
chr1	65918834	65992617	chr1_PDE4B+:E005:downstream	chr1	65973607	65973608	rs1937438
chr1	65918834	65992617	chr1_PDE4B+:E005:downstream	chr1	65973443	65973444	rs1937439
chr1	65918834	65992617	chr1_PDE4B+:E005:downstream	chr1	65978333	65978334	rs2503199
chr1	65918834	65992617	chr1_PDE4B+:E005:downstream	chr1	65976341	65976342	rs2503201
chr1	65918834	65992617	chr1_PDE4B+:E005:downstream	chr1	65972971	65972972	rs2503207
chr1	65918834	65992617	chr1_PDE4B+:E005:downstream	chr1	65970269	65970270	rs6691929
chr1	65918834	65992617	chr1_PDE4B+:E005:downstream	chr1	65969059	65969060	rs7519259
chr1	65918834	65992617	chr1_PDE4B+:E005:downstream	chr1	65979832	65979833	rs12564578
chr1	65918834	65992617	chr1_PDE4B+:E005:downstream	chr1	65983565	65983566	rs12732753
chr1	65918834	65992617	chr1_PDE4B+:E005:downstream	chr1	65986093	65986094	rs1317611
chr1	65918834	65992617	chr1_PDE4B+:E005:downstream	chr1	65978499	65978500	rs1937433
chr1	65918834	65992617	chr1_PDE4B+:E005:downstream	chr1	65980988	65980989	rs1937453
chr1	65918834	65992617	chr1_PDE4B+:E005:downstream	chr1	65981103	65981104	rs1937457
chr1	65918834	65992617	chr1_PDE4B+:E005:downstream	chr1	65982321	65982322	rs2096406
chr1	65918834	65992617	chr1_PDE4B+:E005:downstream	chr1	65991560	65991561	rs2253745
chr1	65918834	65992617	chr1_PDE4B+:E005:downstream	chr1	65983011	65983012	rs2489918
chr1	65918834	65992617	chr1_PDE4B+:E005:downstream	chr1	65983531	65983532	rs2503194
chr1	65918834	65992617	chr1_PDE4B+:E005:downstream	chr1	65981839	65981840	rs2503196
chr1	65918834	65992617	chr1_PDE4B+:E005:downstream	chr1	65978965	65978966	rs2503197
chr1	65918834	65992617	chr1_PDE4B+:E005:downstream	chr1	65980174	65980175	rs6684069
chr1	65918834	65992617	chr1_PDE4B+:E005:downstream	chr1	65981710	65981711	rs6690398
chr1	8656440	8703056	chr1_RERE-:E025:downstream	chr1	8664462	8664463	rs10864360
chr1	8656440	8703056	chr1_RERE-:E025:downstream	chr1	8666661	8666662	rs10864361
chr1	8656440	8703056	chr1_RERE-:E025:downstream	chr1	8673068	8673069	rs11121215
chr1	8656440	8703056	chr1_RERE-:E025:downstream	chr1	8681341	8681342	rs7556169
chr2	171553499	171554525	chr2_CYBRD1+:E005:downstream	chr2	171553675	171553676	rs17288588
chr3	136930593	136945584	chr3_NCK1+:E005:downstream	chr3	136932310	136932311	rs10935210
chr3	136930593	136945584	chr3_NCK1+:E005:downstream	chr3	136933121	136933122	rs1344790
chr3	136930593	136945584	chr3_NCK1+:E005:downstream	chr3	136932674	136932675	rs1965109
chr3	136930593	136945584	chr3_NCK1+:E005:downstream	chr3	136935841	136935842	rs3963921
chr3	136930593	136945584	chr3_NCK1+:E005:downstream	chr3	136934840	136934841	rs4678275
chr3	136930593	136945584	chr3_NCK1+:E005:downstream	chr3	136936470	136936471	rs6771717
chr3	136930593	136945584	chr3_NCK1+:E005:downstream	chr3	136937186	136937187	rs6786302
chr3	136930593	136945584	chr3_NCK1+:E005:downstream	chr3	136934038	136934039	rs7611847
chr3	136930593	136945584	chr3_NCK1+:E005:downstream	chr3	136930620	136930621	rs7648817
chr3	136930593	136945584	chr3_NCK1+:E005:downstream	chr3	136943219	136943220	rs3845925
chr3	136930593	136945584	chr3_NCK1+:E005:downstream	chr3	136940881	136940882	rs6775389
chr3	136930593	136945584	chr3_NCK1+:E005:downstream	chr3	136943760	136943761	rs9833952
chr5	96743745	96746343	chr5_CAST+:E022:downstream	chr5	96744763	96744764	rs26507
chr5	96743745	96746343	chr5_CAST+:E022:downstream	chr5	96745178	96745179	rs3822683
chr5	96763227	96768316	chr5_ERAP1-:E002:downstream	chr5	96766239	96766240	rs27524
chr6	56900620	56953759	chr6_DST-:E122:downstream	chr6	56945740	56945741	rs1020548
chr6	56900620	56953759	chr6_DST-:E122:downstream	chr6	56946325	56946326	rs2817573
chr6	108656537	108663456	chr6_FOXO3+:E011:downstream	chr6	108662863	108662864	rs12196996
chr6	108656537	108663456	chr6_FOXO3+:E011:downstream	chr6	108659992	108659993	rs12212067
chr6	108656537	108663456	chr6_FOXO3+:E011:downstream	chr6	108662323	108662324	rs9398171
chr6	125781370	125786138	chr6_NCOA7+:E004:downstream	chr6	125785426	125785427	rs1028481
chr6	125781370	125786138	chr6_NCOA7+:E004:downstream	chr6	125781834	125781835	rs4897157
chr6	125781370	125786138	chr6_NCOA7+:E004:downstream	chr6	125782971	125782972	rs9401845

## Sheet: T2D obese T2D conf vs day 3
exon_chr	exon_start	exon_end	exon_name	snp_chr	snp_start	snp_end	snp_name
chr11	72707373	72709871	chr11_ARAP1-:E025:upstream	chr11	72708468	72708469	11-72419514
chr11	45872232	45880915	chr11_CRY2+:E013:upstream	chr11	45875245	45875246	11-45896797
chr11	65444456	65444559	chr11_NEAT1+:E003:upstream	chr11	65444507	65444508	11-65211979
chr11	17075622	17077169	chr11_RPS13-:E004:upstream	chr11	17076147	17076148	11-17097695
chr11	17075622	17077169	chr11_RPS13-:E004:upstream	chr11	17076318	17076319	11-17097866
chr17	17820520	17823519	chr17_SREBF1-:E028:upstream	chr17	17821474	17821475	17-17724789
chr17	17820520	17823519	chr17_SREBF1-:E028:upstream	chr17	17823154	17823155	17-17726469
chr1	39084437	39105380	chr1_MACF1+:E007:upstream	chr1	39084948	39084949	1-39550621
chr1	39084437	39105380	chr1_MACF1+:E007:upstream	chr1	39085815	39085816	1-39551488
chr1	39084437	39105380	chr1_MACF1+:E007:upstream	chr1	39087290	39087291	1-39552963
chr1	39084437	39105380	chr1_MACF1+:E007:upstream	chr1	39088361	39088362	1-39554034
chr1	39084437	39105380	chr1_MACF1+:E007:upstream	chr1	39094577	39094578	1-39560250
chr1	39084437	39105380	chr1_MACF1+:E007:upstream	chr1	39096954	39096955	1-39562627
chr1	39084437	39105380	chr1_MACF1+:E007:upstream	chr1	39099257	39099258	1-39564930
chr1	39084437	39105380	chr1_MACF1+:E007:upstream	chr1	39101093	39101094	1-39566766
chr1	39084437	39105380	chr1_MACF1+:E007:upstream	chr1	39103898	39103899	1-39569571
chr1	39159019	39204303	chr1_MACF1+:E009:upstream	chr1	39160969	39160970	1-39626642
chr1	39159019	39204303	chr1_MACF1+:E009:upstream	chr1	39162738	39162739	1-39628411
chr1	39159019	39204303	chr1_MACF1+:E009:upstream	chr1	39163207	39163208	1-39628880
chr1	39159019	39204303	chr1_MACF1+:E009:upstream	chr1	39163389	39163390	1-39629062
chr1	39159019	39204303	chr1_MACF1+:E009:upstream	chr1	39165624	39165625	1-39631297
chr1	39159019	39204303	chr1_MACF1+:E009:upstream	chr1	39171228	39171229	1-39636901
chr1	39159019	39204303	chr1_MACF1+:E009:upstream	chr1	39171632	39171633	1-39637305
chr1	39159019	39204303	chr1_MACF1+:E009:upstream	chr1	39173980	39173981	1-39639653
chr1	39159019	39204303	chr1_MACF1+:E009:upstream	chr1	39174071	39174072	1-39639744
chr1	39159019	39204303	chr1_MACF1+:E009:upstream	chr1	39177709	39177710	1-39643382
chr1	39159019	39204303	chr1_MACF1+:E009:upstream	chr1	39177791	39177792	1-39643464
chr1	39159019	39204303	chr1_MACF1+:E009:upstream	chr1	39178039	39178040	1-39643712
chr1	39159019	39204303	chr1_MACF1+:E009:upstream	chr1	39181114	39181115	1-39646787
chr1	39159019	39204303	chr1_MACF1+:E009:upstream	chr1	39181365	39181366	1-39647038
chr1	39159019	39204303	chr1_MACF1+:E009:upstream	chr1	39181947	39181948	1-39647620
chr1	39159019	39204303	chr1_MACF1+:E009:upstream	chr1	39183525	39183526	1-39649198
chr1	39159019	39204303	chr1_MACF1+:E009:upstream	chr1	39187091	39187092	1-39652764
chr1	39159019	39204303	chr1_MACF1+:E009:upstream	chr1	39188321	39188322	1-39653994
chr1	39159019	39204303	chr1_MACF1+:E009:upstream	chr1	39188699	39188700	1-39654372
chr1	39159019	39204303	chr1_MACF1+:E009:upstream	chr1	39190728	39190729	1-39656401
chr1	39159019	39204303	chr1_MACF1+:E009:upstream	chr1	39195174	39195175	1-39660847
chr1	39159019	39204303	chr1_MACF1+:E009:upstream	chr1	39196835	39196836	1-39662508
chr1	39159019	39204303	chr1_MACF1+:E009:upstream	chr1	39196929	39196930	1-39662602
chr1	39159019	39204303	chr1_MACF1+:E009:upstream	chr1	39196945	39196946	1-39662618
chr1	39159019	39204303	chr1_MACF1+:E009:upstream	chr1	39199009	39199010	1-39664682
chr1	39159019	39204303	chr1_MACF1+:E009:upstream	chr1	39202342	39202343	1-39668015
chr1	39159019	39204303	chr1_MACF1+:E009:upstream	chr1	39203009	39203010	1-39668682
chr1	39159019	39204303	chr1_MACF1+:E009:upstream	chr1	39203864	39203865	1-39669537
chr1	39254374	39257937	chr1_MACF1+:E018:upstream	chr1	39256541	39256542	1-39722214
chr1	39254374	39257937	chr1_MACF1+:E018:upstream	chr1	39257402	39257403	1-39723075
chr1	39258027	39268466	chr1_MACF1+:E019:upstream	chr1	39260509	39260510	1-39726182
chr1	39258027	39268466	chr1_MACF1+:E019:upstream	chr1	39263934	39263935	1-39729607
chr1	39258027	39268466	chr1_MACF1+:E019:upstream	chr1	39264499	39264500	1-39730172
chr1	39258027	39268466	chr1_MACF1+:E019:upstream	chr1	39265877	39265878	1-39731550
chr1	39258027	39268466	chr1_MACF1+:E019:upstream	chr1	39267826	39267827	1-39733499
chr1	39258027	39268466	chr1_MACF1+:E019:upstream	chr1	39268060	39268061	1-39733733
chr1	39269719	39282209	chr1_MACF1+:E020:upstream	chr1	39270661	39270662	1-39736334
chr1	39269719	39282209	chr1_MACF1+:E020:upstream	chr1	39275847	39275848	1-39741520
chr1	39269719	39282209	chr1_MACF1+:E020:upstream	chr1	39277196	39277197	1-39742869
chr1	39269719	39282209	chr1_MACF1+:E020:upstream	chr1	39278945	39278946	1-39744618
chr1	39269719	39282209	chr1_MACF1+:E020:upstream	chr1	39279935	39279936	1-39745608
chr1	39282373	39283190	chr1_MACF1+:E021:upstream	chr1	39282598	39282599	1-39748271
chr1	39282373	39283190	chr1_MACF1+:E021:upstream	chr1	39282866	39282867	1-39748539
chr1	39282373	39283190	chr1_MACF1+:E021:upstream	chr1	39282989	39282990	1-39748662
chr1	39300361	39302925	chr1_MACF1+:E036:upstream	chr1	39300368	39300369	1-39766041
chr1	39300361	39302925	chr1_MACF1+:E036:upstream	chr1	39300382	39300383	1-39766055
chr1	39300361	39302925	chr1_MACF1+:E036:upstream	chr1	39300976	39300977	1-39766649
chr1	39303077	39309571	chr1_MACF1+:E037:upstream	chr1	39303327	39303328	1-39769000
chr1	39303077	39309571	chr1_MACF1+:E037:upstream	chr1	39304554	39304555	1-39770227
chr1	39303077	39309571	chr1_MACF1+:E037:upstream	chr1	39304605	39304606	1-39770278
chr1	39303077	39309571	chr1_MACF1+:E037:upstream	chr1	39306397	39306398	1-39772070
chr1	39310999	39315514	chr1_MACF1+:E040:upstream	chr1	39311486	39311487	1-39777159
chr1	39310999	39315514	chr1_MACF1+:E040:upstream	chr1	39314129	39314130	1-39779802
chr1	39340952	39346978	chr1_MACF1+:E055:upstream	chr1	39341345	39341346	1-39807018
chr1	39340952	39346978	chr1_MACF1+:E055:upstream	chr1	39341785	39341786	1-39807458
chr1	39340952	39346978	chr1_MACF1+:E055:upstream	chr1	39343611	39343612	1-39809284
chr1	39340952	39346978	chr1_MACF1+:E055:upstream	chr1	39345532	39345533	1-39811205
chr1	39340952	39346978	chr1_MACF1+:E055:upstream	chr1	39346761	39346762	1-39812434
chr1	39340952	39346978	chr1_MACF1+:E055:upstream	chr1	39346845	39346846	1-39812518
chr1	39347209	39349479	chr1_MACF1+:E057:upstream	chr1	39349287	39349288	1-39814960
chr1	39347209	39349479	chr1_MACF1+:E057:upstream	chr1	39349470	39349471	1-39815143
chr1	39351017	39353008	chr1_MACF1+:E059:upstream	chr1	39351268	39351269	1-39816941
chr1	39351017	39353008	chr1_MACF1+:E059:upstream	chr1	39352379	39352380	1-39818052
chr1	39353230	39357376	chr1_MACF1+:E060:upstream	chr1	39353830	39353831	1-39819503
chr1	39353230	39357376	chr1_MACF1+:E060:upstream	chr1	39354465	39354466	1-39820138
chr1	39353230	39357376	chr1_MACF1+:E060:upstream	chr1	39354637	39354638	1-39820310
chr1	39353230	39357376	chr1_MACF1+:E060:upstream	chr1	39355253	39355254	1-39820926
chr1	39353230	39357376	chr1_MACF1+:E060:upstream	chr1	39355290	39355291	1-39820963
chr1	39353230	39357376	chr1_MACF1+:E060:upstream	chr1	39356008	39356009	1-39821681
chr1	39353230	39357376	chr1_MACF1+:E060:upstream	chr1	39356064	39356065	1-39821737
chr1	39359263	39360794	chr1_MACF1+:E063:upstream	chr1	39359765	39359766	1-39825438
chr1	39359263	39360794	chr1_MACF1+:E063:upstream	chr1	39360332	39360333	1-39826005
chr1	39361676	39368149	chr1_MACF1+:E065:upstream	chr1	39366095	39366096	1-39831768
chr1	39361676	39368149	chr1_MACF1+:E065:upstream	chr1	39366734	39366735	1-39832407
chr1	39361676	39368149	chr1_MACF1+:E065:upstream	chr1	39367800	39367801	1-39833473
chr1	39361676	39368149	chr1_MACF1+:E065:upstream	chr1	39367830	39367831	1-39833503
chr1	39361676	39368149	chr1_MACF1+:E065:upstream	chr1	39367862	39367863	1-39833535
chr1	39368313	39370031	chr1_MACF1+:E066:upstream	chr1	39368944	39368945	1-39834617
chr1	39368313	39370031	chr1_MACF1+:E066:upstream	chr1	39369867	39369868	1-39835540
chr1	39370185	39372480	chr1_MACF1+:E067:upstream	chr1	39371429	39371430	1-39837102
chr1	39370185	39372480	chr1_MACF1+:E067:upstream	chr1	39371671	39371672	1-39837344
chr1	39370185	39372480	chr1_MACF1+:E067:upstream	chr1	39371954	39371955	1-39837627
chr1	39380372	39381954	chr1_MACF1+:E071:upstream	chr1	39380594	39380595	1-39846267
chr1	39380372	39381954	chr1_MACF1+:E071:upstream	chr1	39380816	39380817	1-39846489
chr1	39380372	39381954	chr1_MACF1+:E071:upstream	chr1	39380917	39380918	1-39846590
chr1	39382151	39385435	chr1_MACF1+:E072:upstream	chr1	39382674	39382675	1-39848347
chr1	39385928	39387188	chr1_MACF1+:E074:upstream	chr1	39386469	39386470	1-39852142
chr1	39422899	39424029	chr1_MACF1+:E077:upstream	chr1	39424004	39424005	1-39889677
chr1	39424193	39427456	chr1_MACF1+:E078:upstream	chr1	39427101	39427102	1-39892774
chr1	39424193	39427456	chr1_MACF1+:E078:upstream	chr1	39427420	39427421	1-39893093
chr1	39429325	39429828	chr1_MACF1+:E081:upstream	chr1	39429787	39429788	1-39895460
chr1	39436489	39437778	chr1_MACF1+:E088:upstream	chr1	39437456	39437457	1-39903129
chr1	39438007	39439275	chr1_MACF1+:E089:upstream	chr1	39438939	39438940	1-39904612
chr1	39439499	39441004	chr1_MACF1+:E090:upstream	chr1	39439915	39439916	1-39905588
chr1	39439499	39441004	chr1_MACF1+:E090:upstream	chr1	39440200	39440201	1-39905873
chr1	39443573	39444663	chr1_MACF1+:E097:upstream	chr1	39443882	39443883	1-39909555
chr1	39444834	39447433	chr1_MACF1+:E098:upstream	chr1	39445328	39445329	1-39911001
chr1	39447586	39447693	chr1_MACF1+:E099:upstream	chr1	39447678	39447679	1-39913351
chr1	39448151	39448595	chr1_MACF1+:E101:upstream	chr1	39448417	39448418	1-39914090
chr1	39448762	39451053	chr1_MACF1+:E102:upstream	chr1	39449536	39449537	1-39915209
chr1	39455096	39458371	chr1_MACF1+:E107:upstream	chr1	39456138	39456139	1-39921811
chr1	39455096	39458371	chr1_MACF1+:E107:upstream	chr1	39456753	39456754	1-39922426
chr1	39455096	39458371	chr1_MACF1+:E107:upstream	chr1	39457211	39457212	1-39922884
chr1	39455096	39458371	chr1_MACF1+:E107:upstream	chr1	39458059	39458060	1-39923732
chr1	39458489	39459087	chr1_MACF1+:E108:upstream	chr1	39458725	39458726	1-39924398
chr1	39462036	39463613	chr1_MACF1+:E111:upstream	chr1	39463311	39463312	1-39928984
chr1	39462036	39463613	chr1_MACF1+:E111:upstream	chr1	39463567	39463568	1-39929240
chr1	39469614	39479799	chr1_MACF1+:E115:upstream	chr1	39472023	39472024	1-39937696
chr1	39469614	39479799	chr1_MACF1+:E115:upstream	chr1	39472584	39472585	1-39938257
chr1	39469614	39479799	chr1_MACF1+:E115:upstream	chr1	39474550	39474551	1-39940223
chr1	39469614	39479799	chr1_MACF1+:E115:upstream	chr1	39474826	39474827	1-39940499
chr1	39469614	39479799	chr1_MACF1+:E115:upstream	chr1	39476624	39476625	1-39942297
chr1	39469614	39479799	chr1_MACF1+:E115:upstream	chr1	39478507	39478508	1-39944180
chr1	39469614	39479799	chr1_MACF1+:E115:upstream	chr1	39478576	39478577	1-39944249
chr1	39469614	39479799	chr1_MACF1+:E115:upstream	chr1	39479095	39479096	1-39944768
chr1	39469614	39479799	chr1_MACF1+:E115:upstream	chr1	39479624	39479625	1-39945297
chr1	39481029	39484602	chr1_MACF1+:E117:upstream	chr1	39482551	39482552	1-39948224
chr1	39481029	39484602	chr1_MACF1+:E117:upstream	chr1	39482666	39482667	1-39948339
chr1	39481029	39484602	chr1_MACF1+:E117:upstream	chr1	39483068	39483069	1-39948741
chr1	39481029	39484602	chr1_MACF1+:E117:upstream	chr1	39484407	39484408	1-39950080
chr2	190687316	190690246	chr2_NAB1+:E027:upstream	chr2	190687430	190687431	2-191552157
chr2	27387157	27409304	chr2_PPM1G-:E010:upstream	chr2	27388049	27388050	2-27610917
chr2	27387157	27409304	chr2_PPM1G-:E010:upstream	chr2	27388601	27388602	2-27611469
chr2	27387157	27409304	chr2_PPM1G-:E010:upstream	chr2	27390163	27390164	2-27613031
chr2	27387157	27409304	chr2_PPM1G-:E010:upstream	chr2	27391581	27391582	2-27614449
chr2	27387157	27409304	chr2_PPM1G-:E010:upstream	chr2	27392426	27392427	2-27615294
chr2	27387157	27409304	chr2_PPM1G-:E010:upstream	chr2	27392521	27392522	2-27615389
chr2	27387157	27409304	chr2_PPM1G-:E010:upstream	chr2	27393922	27393923	2-27616790
chr2	27387157	27409304	chr2_PPM1G-:E010:upstream	chr2	27396181	27396182	2-27619049
chr2	27387157	27409304	chr2_PPM1G-:E010:upstream	chr2	27397959	27397960	2-27620827
chr2	27387157	27409304	chr2_PPM1G-:E010:upstream	chr2	27402793	27402794	2-27625661
chr2	27387157	27409304	chr2_PPM1G-:E010:upstream	chr2	27403149	27403150	2-27626017
chr2	27387157	27409304	chr2_PPM1G-:E010:upstream	chr2	27404077	27404078	2-27626945
chr2	27387157	27409304	chr2_PPM1G-:E010:upstream	chr2	27404498	27404499	2-27627366
chr2	27387157	27409304	chr2_PPM1G-:E010:upstream	chr2	27408323	27408324	2-27631191
chr3	23271165	23332170	chr3_UBE2E2+:E007:upstream	chr3	23271421	23271422	3-23312913
chr3	23271165	23332170	chr3_UBE2E2+:E007:upstream	chr3	23272238	23272239	3-23313730
chr3	23271165	23332170	chr3_UBE2E2+:E007:upstream	chr3	23272284	23272285	3-23313776
chr3	23271165	23332170	chr3_UBE2E2+:E007:upstream	chr3	23272598	23272599	3-23314090
chr3	23271165	23332170	chr3_UBE2E2+:E007:upstream	chr3	23273047	23273048	3-23314539
chr3	23271165	23332170	chr3_UBE2E2+:E007:upstream	chr3	23273255	23273256	3-23314747
chr3	23271165	23332170	chr3_UBE2E2+:E007:upstream	chr3	23273372	23273373	3-23314864
chr3	23271165	23332170	chr3_UBE2E2+:E007:upstream	chr3	23273706	23273707	3-23315198
chr3	23271165	23332170	chr3_UBE2E2+:E007:upstream	chr3	23274375	23274376	3-23315867
chr3	23271165	23332170	chr3_UBE2E2+:E007:upstream	chr3	23276432	23276433	3-23317924
chr3	23271165	23332170	chr3_UBE2E2+:E007:upstream	chr3	23276652	23276653	3-23318144
chr3	23271165	23332170	chr3_UBE2E2+:E007:upstream	chr3	23280428	23280429	3-23321920
chr3	23271165	23332170	chr3_UBE2E2+:E007:upstream	chr3	23281134	23281135	3-23322626
chr3	23271165	23332170	chr3_UBE2E2+:E007:upstream	chr3	23281659	23281660	3-23323151
chr3	23271165	23332170	chr3_UBE2E2+:E007:upstream	chr3	23283528	23283529	3-23325020
chr3	23271165	23332170	chr3_UBE2E2+:E007:upstream	chr3	23284498	23284499	3-23325990
chr3	23271165	23332170	chr3_UBE2E2+:E007:upstream	chr3	23286750	23286751	3-23328242
chr3	23271165	23332170	chr3_UBE2E2+:E007:upstream	chr3	23288303	23288304	3-23329795
chr3	23271165	23332170	chr3_UBE2E2+:E007:upstream	chr3	23289443	23289444	3-23330935
chr3	23271165	23332170	chr3_UBE2E2+:E007:upstream	chr3	23290460	23290461	3-23331952
chr3	23271165	23332170	chr3_UBE2E2+:E007:upstream	chr3	23291292	23291293	3-23332784
chr3	23271165	23332170	chr3_UBE2E2+:E007:upstream	chr3	23292112	23292113	3-23333604
chr3	23271165	23332170	chr3_UBE2E2+:E007:upstream	chr3	23294958	23294959	3-23336450
chr3	23271165	23332170	chr3_UBE2E2+:E007:upstream	chr3	23295488	23295489	3-23336980
chr3	23271165	23332170	chr3_UBE2E2+:E007:upstream	chr3	23295729	23295730	3-23337221
chr3	23271165	23332170	chr3_UBE2E2+:E007:upstream	chr3	23296313	23296314	3-23337805
chr3	23271165	23332170	chr3_UBE2E2+:E007:upstream	chr3	23296519	23296520	3-23338011
chr3	23271165	23332170	chr3_UBE2E2+:E007:upstream	chr3	23296551	23296552	3-23338043
chr3	23271165	23332170	chr3_UBE2E2+:E007:upstream	chr3	23297614	23297615	3-23339106
chr3	23271165	23332170	chr3_UBE2E2+:E007:upstream	chr3	23298995	23298996	3-23340487
chr3	23271165	23332170	chr3_UBE2E2+:E007:upstream	chr3	23299201	23299202	3-23340693
chr3	23271165	23332170	chr3_UBE2E2+:E007:upstream	chr3	23299376	23299377	3-23340868
chr3	23271165	23332170	chr3_UBE2E2+:E007:upstream	chr3	23301865	23301866	3-23343357
chr3	23271165	23332170	chr3_UBE2E2+:E007:upstream	chr3	23301884	23301885	3-23343376
chr3	23271165	23332170	chr3_UBE2E2+:E007:upstream	chr3	23302891	23302892	3-23344383
chr3	23271165	23332170	chr3_UBE2E2+:E007:upstream	chr3	23303087	23303088	3-23344579
chr3	23271165	23332170	chr3_UBE2E2+:E007:upstream	chr3	23304370	23304371	3-23345862
chr3	23271165	23332170	chr3_UBE2E2+:E007:upstream	chr3	23304554	23304555	3-23346046
chr3	23271165	23332170	chr3_UBE2E2+:E007:upstream	chr3	23305040	23305041	3-23346532
chr3	23271165	23332170	chr3_UBE2E2+:E007:upstream	chr3	23305303	23305304	3-23346795
chr3	23271165	23332170	chr3_UBE2E2+:E007:upstream	chr3	23306190	23306191	3-23347682
chr3	23271165	23332170	chr3_UBE2E2+:E007:upstream	chr3	23308283	23308284	3-23349775
chr3	23271165	23332170	chr3_UBE2E2+:E007:upstream	chr3	23308974	23308975	3-23350466
chr3	23271165	23332170	chr3_UBE2E2+:E007:upstream	chr3	23311077	23311078	3-23352569
chr3	23271165	23332170	chr3_UBE2E2+:E007:upstream	chr3	23312631	23312632	3-23354123
chr3	23271165	23332170	chr3_UBE2E2+:E007:upstream	chr3	23313146	23313147	3-23354638
chr3	23271165	23332170	chr3_UBE2E2+:E007:upstream	chr3	23315799	23315800	3-23357291
chr3	23271165	23332170	chr3_UBE2E2+:E007:upstream	chr3	23318593	23318594	3-23360085
chr3	23271165	23332170	chr3_UBE2E2+:E007:upstream	chr3	23319135	23319136	3-23360627
chr3	23271165	23332170	chr3_UBE2E2+:E007:upstream	chr3	23319971	23319972	3-23361463
chr3	23271165	23332170	chr3_UBE2E2+:E007:upstream	chr3	23322366	23322367	3-23363858
chr3	23271165	23332170	chr3_UBE2E2+:E007:upstream	chr3	23327848	23327849	3-23369340
chr3	23271165	23332170	chr3_UBE2E2+:E007:upstream	chr3	23327868	23327869	3-23369360
chr3	23271165	23332170	chr3_UBE2E2+:E007:upstream	chr3	23328252	23328253	3-23369744
chr3	23271165	23332170	chr3_UBE2E2+:E007:upstream	chr3	23330144	23330145	3-23371636
chr3	23271165	23332170	chr3_UBE2E2+:E007:upstream	chr3	23332154	23332155	3-23373646
chr4	103153249	103158301	chr4_CENPE-:E028:upstream	chr4	103158266	103158267	4-104079424
chr4	88805051	88822977	chr4_FAM13A-:E020:upstream	chr4	88819742	88819743	4-89740894
chr5	102974435	102987519	chr5_PAM+:E024:upstream	chr5	102974461	102974462	5-102310166
chr5	102974435	102987519	chr5_PAM+:E024:upstream	chr5	102976833	102976834	5-102312538
chr5	102974435	102987519	chr5_PAM+:E024:upstream	chr5	102977978	102977979	5-102313683
chr5	102974435	102987519	chr5_PAM+:E024:upstream	chr5	102978234	102978235	5-102313939
chr5	102974435	102987519	chr5_PAM+:E024:upstream	chr5	102978352	102978353	5-102314057
chr5	102974435	102987519	chr5_PAM+:E024:upstream	chr5	102978522	102978523	5-102314227
chr5	102974435	102987519	chr5_PAM+:E024:upstream	chr5	102980901	102980902	5-102316606
chr5	102974435	102987519	chr5_PAM+:E024:upstream	chr5	102981337	102981338	5-102317042
chr5	102974435	102987519	chr5_PAM+:E024:upstream	chr5	102981412	102981413	5-102317117
chr5	102974435	102987519	chr5_PAM+:E024:upstream	chr5	102981713	102981714	5-102317418
chr5	102974435	102987519	chr5_PAM+:E024:upstream	chr5	102983269	102983270	5-102318974
chr5	102974435	102987519	chr5_PAM+:E024:upstream	chr5	102983332	102983333	5-102319037
chr5	102974435	102987519	chr5_PAM+:E024:upstream	chr5	102986200	102986201	5-102321905
chr5	102974435	102987519	chr5_PAM+:E024:upstream	chr5	102986743	102986744	5-102322448
chr8	94726440	94734631	chr8_DPY19L4+:E011:upstream	chr8	94727413	94727414	8-95739642
chr8	94726440	94734631	chr8_DPY19L4+:E011:upstream	chr8	94730066	94730067	8-95742295
chr11	72695864	72696550	chr11_ARAP1-:E012:downstream	chr11	72696116	72696117	11-72407162
chr11	72695864	72696550	chr11_ARAP1-:E012:downstream	chr11	72696223	72696224	11-72407269
chr11	65444456	65444559	chr11_NEAT1+:E002:downstream	chr11	65444507	65444508	11-65211979
chr1	39084437	39105380	chr1_MACF1+:E006:downstream	chr1	39084948	39084949	1-39550621
chr1	39084437	39105380	chr1_MACF1+:E006:downstream	chr1	39085815	39085816	1-39551488
chr1	39084437	39105380	chr1_MACF1+:E006:downstream	chr1	39087290	39087291	1-39552963
chr1	39084437	39105380	chr1_MACF1+:E006:downstream	chr1	39088361	39088362	1-39554034
chr1	39084437	39105380	chr1_MACF1+:E006:downstream	chr1	39094577	39094578	1-39560250
chr1	39084437	39105380	chr1_MACF1+:E006:downstream	chr1	39096954	39096955	1-39562627
chr1	39084437	39105380	chr1_MACF1+:E006:downstream	chr1	39099257	39099258	1-39564930
chr1	39084437	39105380	chr1_MACF1+:E006:downstream	chr1	39101093	39101094	1-39566766
chr1	39084437	39105380	chr1_MACF1+:E006:downstream	chr1	39103898	39103899	1-39569571
chr1	39105716	39157947	chr1_MACF1+:E007:downstream	chr1	39106319	39106320	1-39571992
chr1	39105716	39157947	chr1_MACF1+:E007:downstream	chr1	39107546	39107547	1-39573219
chr1	39105716	39157947	chr1_MACF1+:E007:downstream	chr1	39110309	39110310	1-39575982
chr1	39105716	39157947	chr1_MACF1+:E007:downstream	chr1	39110948	39110949	1-39576621
chr1	39105716	39157947	chr1_MACF1+:E007:downstream	chr1	39112859	39112860	1-39578532
chr1	39105716	39157947	chr1_MACF1+:E007:downstream	chr1	39113313	39113314	1-39578986
chr1	39105716	39157947	chr1_MACF1+:E007:downstream	chr1	39121605	39121606	1-39587278
chr1	39105716	39157947	chr1_MACF1+:E007:downstream	chr1	39121715	39121716	1-39587388
chr1	39105716	39157947	chr1_MACF1+:E007:downstream	chr1	39123294	39123295	1-39588967
chr1	39105716	39157947	chr1_MACF1+:E007:downstream	chr1	39124736	39124737	1-39590409
chr1	39105716	39157947	chr1_MACF1+:E007:downstream	chr1	39126106	39126107	1-39591779
chr1	39105716	39157947	chr1_MACF1+:E007:downstream	chr1	39128429	39128430	1-39594102
chr1	39105716	39157947	chr1_MACF1+:E007:downstream	chr1	39130464	39130465	1-39596137
chr1	39105716	39157947	chr1_MACF1+:E007:downstream	chr1	39137082	39137083	1-39602755
chr1	39105716	39157947	chr1_MACF1+:E007:downstream	chr1	39137541	39137542	1-39603214
chr1	39105716	39157947	chr1_MACF1+:E007:downstream	chr1	39139418	39139419	1-39605091
chr1	39105716	39157947	chr1_MACF1+:E007:downstream	chr1	39144111	39144112	1-39609784
chr1	39105716	39157947	chr1_MACF1+:E007:downstream	chr1	39146567	39146568	1-39612240
chr1	39105716	39157947	chr1_MACF1+:E007:downstream	chr1	39146820	39146821	1-39612493
chr1	39105716	39157947	chr1_MACF1+:E007:downstream	chr1	39146884	39146885	1-39612557
chr1	39105716	39157947	chr1_MACF1+:E007:downstream	chr1	39148139	39148140	1-39613812
chr1	39105716	39157947	chr1_MACF1+:E007:downstream	chr1	39150609	39150610	1-39616282
chr1	39105716	39157947	chr1_MACF1+:E007:downstream	chr1	39151017	39151018	1-39616690
chr1	39105716	39157947	chr1_MACF1+:E007:downstream	chr1	39151407	39151408	1-39617080
chr1	39105716	39157947	chr1_MACF1+:E007:downstream	chr1	39152883	39152884	1-39618556
chr1	39105716	39157947	chr1_MACF1+:E007:downstream	chr1	39155284	39155285	1-39620957
chr1	39105716	39157947	chr1_MACF1+:E007:downstream	chr1	39155879	39155880	1-39621552
chr1	39105716	39157947	chr1_MACF1+:E007:downstream	chr1	39156915	39156916	1-39622588
chr1	39105716	39157947	chr1_MACF1+:E007:downstream	chr1	39157150	39157151	1-39622823
chr1	39105716	39157947	chr1_MACF1+:E007:downstream	chr1	39157634	39157635	1-39623307
chr1	39205130	39213762	chr1_MACF1+:E009:downstream	chr1	39205819	39205820	1-39671492
chr1	39205130	39213762	chr1_MACF1+:E009:downstream	chr1	39206872	39206873	1-39672545
chr1	39205130	39213762	chr1_MACF1+:E009:downstream	chr1	39208915	39208916	1-39674588
chr1	39205130	39213762	chr1_MACF1+:E009:downstream	chr1	39209649	39209650	1-39675322
chr1	39205130	39213762	chr1_MACF1+:E009:downstream	chr1	39213317	39213318	1-39678990
chr1	39205130	39213762	chr1_MACF1+:E009:downstream	chr1	39213729	39213730	1-39679402
chr1	39258027	39268466	chr1_MACF1+:E018:downstream	chr1	39260509	39260510	1-39726182
chr1	39258027	39268466	chr1_MACF1+:E018:downstream	chr1	39263934	39263935	1-39729607
chr1	39258027	39268466	chr1_MACF1+:E018:downstream	chr1	39264499	39264500	1-39730172
chr1	39258027	39268466	chr1_MACF1+:E018:downstream	chr1	39265877	39265878	1-39731550
chr1	39258027	39268466	chr1_MACF1+:E018:downstream	chr1	39267826	39267827	1-39733499
chr1	39258027	39268466	chr1_MACF1+:E018:downstream	chr1	39268060	39268061	1-39733733
chr1	39269719	39282209	chr1_MACF1+:E019:downstream	chr1	39270661	39270662	1-39736334
chr1	39269719	39282209	chr1_MACF1+:E019:downstream	chr1	39275847	39275848	1-39741520
chr1	39269719	39282209	chr1_MACF1+:E019:downstream	chr1	39277196	39277197	1-39742869
chr1	39269719	39282209	chr1_MACF1+:E019:downstream	chr1	39278945	39278946	1-39744618
chr1	39269719	39282209	chr1_MACF1+:E019:downstream	chr1	39279935	39279936	1-39745608
chr1	39282373	39283190	chr1_MACF1+:E020:downstream	chr1	39282598	39282599	1-39748271
chr1	39282373	39283190	chr1_MACF1+:E020:downstream	chr1	39282866	39282867	1-39748539
chr1	39282373	39283190	chr1_MACF1+:E020:downstream	chr1	39282989	39282990	1-39748662
chr1	39287561	39291911	chr1_MACF1+:E028:downstream	chr1	39290644	39290645	1-39756317
chr1	39303077	39309571	chr1_MACF1+:E036:downstream	chr1	39303327	39303328	1-39769000
chr1	39303077	39309571	chr1_MACF1+:E036:downstream	chr1	39304554	39304555	1-39770227
chr1	39303077	39309571	chr1_MACF1+:E036:downstream	chr1	39304605	39304606	1-39770278
chr1	39303077	39309571	chr1_MACF1+:E036:downstream	chr1	39306397	39306398	1-39772070
chr1	39324733	39327219	chr1_MACF1+:E048:downstream	chr1	39326203	39326204	1-39791876
chr1	39340952	39346978	chr1_MACF1+:E054:downstream	chr1	39341345	39341346	1-39807018
chr1	39340952	39346978	chr1_MACF1+:E054:downstream	chr1	39341785	39341786	1-39807458
chr1	39340952	39346978	chr1_MACF1+:E054:downstream	chr1	39343611	39343612	1-39809284
chr1	39340952	39346978	chr1_MACF1+:E054:downstream	chr1	39345532	39345533	1-39811205
chr1	39340952	39346978	chr1_MACF1+:E054:downstream	chr1	39346761	39346762	1-39812434
chr1	39340952	39346978	chr1_MACF1+:E054:downstream	chr1	39346845	39346846	1-39812518
chr1	39347209	39349479	chr1_MACF1+:E056:downstream	chr1	39349287	39349288	1-39814960
chr1	39347209	39349479	chr1_MACF1+:E056:downstream	chr1	39349470	39349471	1-39815143
chr1	39349626	39350786	chr1_MACF1+:E057:downstream	chr1	39349671	39349672	1-39815344
chr1	39353230	39357376	chr1_MACF1+:E059:downstream	chr1	39353830	39353831	1-39819503
chr1	39353230	39357376	chr1_MACF1+:E059:downstream	chr1	39354465	39354466	1-39820138
chr1	39353230	39357376	chr1_MACF1+:E059:downstream	chr1	39354637	39354638	1-39820310
chr1	39353230	39357376	chr1_MACF1+:E059:downstream	chr1	39355253	39355254	1-39820926
chr1	39353230	39357376	chr1_MACF1+:E059:downstream	chr1	39355290	39355291	1-39820963
chr1	39353230	39357376	chr1_MACF1+:E059:downstream	chr1	39356008	39356009	1-39821681
chr1	39353230	39357376	chr1_MACF1+:E059:downstream	chr1	39356064	39356065	1-39821737
chr1	39358872	39359142	chr1_MACF1+:E061:downstream	chr1	39359045	39359046	1-39824718
chr1	39361676	39368149	chr1_MACF1+:E064:downstream	chr1	39366095	39366096	1-39831768
chr1	39361676	39368149	chr1_MACF1+:E064:downstream	chr1	39366734	39366735	1-39832407
chr1	39361676	39368149	chr1_MACF1+:E064:downstream	chr1	39367800	39367801	1-39833473
chr1	39361676	39368149	chr1_MACF1+:E064:downstream	chr1	39367830	39367831	1-39833503
chr1	39361676	39368149	chr1_MACF1+:E064:downstream	chr1	39367862	39367863	1-39833535
chr1	39368313	39370031	chr1_MACF1+:E065:downstream	chr1	39368944	39368945	1-39834617
chr1	39368313	39370031	chr1_MACF1+:E065:downstream	chr1	39369867	39369868	1-39835540
chr1	39370185	39372480	chr1_MACF1+:E066:downstream	chr1	39371429	39371430	1-39837102
chr1	39370185	39372480	chr1_MACF1+:E066:downstream	chr1	39371671	39371672	1-39837344
chr1	39370185	39372480	chr1_MACF1+:E066:downstream	chr1	39371954	39371955	1-39837627
chr1	39372595	39378462	chr1_MACF1+:E067:downstream	chr1	39374631	39374632	1-39840304
chr1	39372595	39378462	chr1_MACF1+:E067:downstream	chr1	39375095	39375096	1-39840768
chr1	39372595	39378462	chr1_MACF1+:E067:downstream	chr1	39376770	39376771	1-39842443
chr1	39372595	39378462	chr1_MACF1+:E067:downstream	chr1	39377017	39377018	1-39842690
chr1	39372595	39378462	chr1_MACF1+:E067:downstream	chr1	39378285	39378286	1-39843958
chr1	39380372	39381954	chr1_MACF1+:E070:downstream	chr1	39380594	39380595	1-39846267
chr1	39380372	39381954	chr1_MACF1+:E070:downstream	chr1	39380816	39380817	1-39846489
chr1	39380372	39381954	chr1_MACF1+:E070:downstream	chr1	39380917	39380918	1-39846590
chr1	39382151	39385435	chr1_MACF1+:E071:downstream	chr1	39382674	39382675	1-39848347
chr1	39385928	39387188	chr1_MACF1+:E073:downstream	chr1	39386469	39386470	1-39852142
chr1	39388657	39422375	chr1_MACF1+:E074:downstream	chr1	39389504	39389505	1-39855177
chr1	39388657	39422375	chr1_MACF1+:E074:downstream	chr1	39391519	39391520	1-39857192
chr1	39388657	39422375	chr1_MACF1+:E074:downstream	chr1	39393121	39393122	1-39858794
chr1	39388657	39422375	chr1_MACF1+:E074:downstream	chr1	39393274	39393275	1-39858947
chr1	39388657	39422375	chr1_MACF1+:E074:downstream	chr1	39394265	39394266	1-39859938
chr1	39388657	39422375	chr1_MACF1+:E074:downstream	chr1	39397542	39397543	1-39863215
chr1	39388657	39422375	chr1_MACF1+:E074:downstream	chr1	39401382	39401383	1-39867055
chr1	39388657	39422375	chr1_MACF1+:E074:downstream	chr1	39405120	39405121	1-39870793
chr1	39388657	39422375	chr1_MACF1+:E074:downstream	chr1	39408866	39408867	1-39874539
chr1	39388657	39422375	chr1_MACF1+:E074:downstream	chr1	39414646	39414647	1-39880319
chr1	39388657	39422375	chr1_MACF1+:E074:downstream	chr1	39415367	39415368	1-39881040
chr1	39388657	39422375	chr1_MACF1+:E074:downstream	chr1	39415795	39415796	1-39881468
chr1	39388657	39422375	chr1_MACF1+:E074:downstream	chr1	39418760	39418761	1-39884433
chr1	39388657	39422375	chr1_MACF1+:E074:downstream	chr1	39420090	39420091	1-39885763
chr1	39388657	39422375	chr1_MACF1+:E074:downstream	chr1	39421100	39421101	1-39886773
chr1	39422899	39424029	chr1_MACF1+:E076:downstream	chr1	39424004	39424005	1-39889677
chr1	39424193	39427456	chr1_MACF1+:E077:downstream	chr1	39427101	39427102	1-39892774
chr1	39424193	39427456	chr1_MACF1+:E077:downstream	chr1	39427420	39427421	1-39893093
chr1	39429325	39429828	chr1_MACF1+:E080:downstream	chr1	39429787	39429788	1-39895460
chr1	39438007	39439275	chr1_MACF1+:E088:downstream	chr1	39438939	39438940	1-39904612
chr1	39439499	39441004	chr1_MACF1+:E089:downstream	chr1	39439915	39439916	1-39905588
chr1	39439499	39441004	chr1_MACF1+:E089:downstream	chr1	39440200	39440201	1-39905873
chr1	39442910	39443447	chr1_MACF1+:E095:downstream	chr1	39443053	39443054	1-39908726
chr1	39444834	39447433	chr1_MACF1+:E097:downstream	chr1	39445328	39445329	1-39911001
chr1	39447586	39447693	chr1_MACF1+:E098:downstream	chr1	39447678	39447679	1-39913351
chr1	39448151	39448595	chr1_MACF1+:E100:downstream	chr1	39448417	39448418	1-39914090
chr1	39448762	39451053	chr1_MACF1+:E101:downstream	chr1	39449536	39449537	1-39915209
chr1	39455096	39458371	chr1_MACF1+:E106:downstream	chr1	39456138	39456139	1-39921811
chr1	39455096	39458371	chr1_MACF1+:E106:downstream	chr1	39456753	39456754	1-39922426
chr1	39455096	39458371	chr1_MACF1+:E106:downstream	chr1	39457211	39457212	1-39922884
chr1	39455096	39458371	chr1_MACF1+:E106:downstream	chr1	39458059	39458060	1-39923732
chr1	39458489	39459087	chr1_MACF1+:E107:downstream	chr1	39458725	39458726	1-39924398
chr1	39462036	39463613	chr1_MACF1+:E110:downstream	chr1	39463311	39463312	1-39928984
chr1	39462036	39463613	chr1_MACF1+:E110:downstream	chr1	39463567	39463568	1-39929240
chr1	39468731	39469548	chr1_MACF1+:E113:downstream	chr1	39469103	39469104	1-39934776
chr3	23343231	23345867	chr3_UBE2E2+:E007:downstream	chr3	23343716	23343717	3-23385208
chr3	23343231	23345867	chr3_UBE2E2+:E007:downstream	chr3	23344385	23344386	3-23385877
chr3	23343231	23345867	chr3_UBE2E2+:E007:downstream	chr3	23344450	23344451	3-23385942
chr3	23343231	23345867	chr3_UBE2E2+:E007:downstream	chr3	23344804	23344805	3-23386296
chr3	23343231	23345867	chr3_UBE2E2+:E007:downstream	chr3	23345079	23345080	3-23386571
chr3	23343231	23345867	chr3_UBE2E2+:E007:downstream	chr3	23345388	23345389	3-23386880
chr3	23343231	23345867	chr3_UBE2E2+:E007:downstream	chr3	23345453	23345454	3-23386945
chr3	23343231	23345867	chr3_UBE2E2+:E007:downstream	chr3	23345464	23345465	3-23386956
chr3	23343231	23345867	chr3_UBE2E2+:E007:downstream	chr3	23345521	23345522	3-23387013
chr5	102987570	102990273	chr5_PAM+:E024:downstream	chr5	102988061	102988062	5-102323766
chr5	102987570	102990273	chr5_PAM+:E024:downstream	chr5	102989913	102989914	5-102325618
chr5	102987570	102990273	chr5_PAM+:E024:downstream	chr5	102989987	102989988	5-102325692
chr5	102987570	102990273	chr5_PAM+:E024:downstream	chr5	102990173	102990174	5-102325878
chr5	52788300	52799886	chr5_PELO+:E001:downstream	chr5	52788530	52788531	5-52084365
chr5	52788300	52799886	chr5_PELO+:E001:downstream	chr5	52788665	52788666	5-52084500
chr5	52788300	52799886	chr5_PELO+:E001:downstream	chr5	52789568	52789569	5-52085403
chr5	52788300	52799886	chr5_PELO+:E001:downstream	chr5	52790144	52790145	5-52085979

[truncated: 2 more sheets: BMI obese T2D day 3 vs day 15, T2D obese T2D day 3 vs day 15]
